# Supplementary material for: CaV1 and CaV2 calcium channels mediate the release of distinct pools of synaptic vesicles
Source: eLife journal article supplement (doi:10.7554/elife.81407), 2023-02-23
Supplement: fig1-data2 [file figure 1 source data 2.xlsx]

## Sheet: Sheet1
Viability	+	+	-	+	+	-	+	-	+	+
Genotype
CaV2	+	CaV2(-)	+	+	+	CaV2(-)	CaV2(nmj-)	CaV2(-)	CaV2(nmj-)	+
CaV1	+	+	CaV1(-)	CaV(ns-)	+	+	+	CaV(ns-)	CaV(ns-)	CaV(ns-)
RyR	+	+	+	+	RyR(-)	RyR(-)	RyR(-)	+	+	RyR(-)
Strain	N2	AQ130	RW3563	EG9034	CB540	n/a	EG9405	n/a	EG9406	EG8827
