# Supplementary material for: CaV1 and CaV2 calcium channels mediate the release of distinct pools of synaptic vesicles
Source: eLife journal article supplement (doi:10.7554/elife.81407), 2023-02-23
Supplement: fig2-data1 [file data_excel_file.xlsx]

## Sheet: Data
wt				unc-68(ns-)				wt(Dantrolene_10µM)				wt(Nemadipine_10µM)				wt(Dan+Nema 10µM)
Filename	minis(HZ)	minis(amp)		Filename	minis(HZ)	minis(amp)		Filename	minis(HZ)	minis(amp)		Filename	minis(HZ)	minis(amp)		Filename	minis(HZ)	minis(amp)
2022_09_06_0020	26.28	12.09		2022_09_06_0001	14.83	7.03		2022_09_09_0009	9.77	6.53		2022_09_06_0027	14.43	10.34		2022_09_13_0001	9.27	7.62
2022_09_07_0000	19.61	12.27		2022_09_06_0002	13.91	8.98		2022_09_09_0011	12.04	6.84		2022_09_06_0028	15.57	10.25		2022_09_13_0003	6.81	7.86
2022_09_07_0018	24.7	14.63		2022_09_06_0003	14.96	9.32		2022_09_07_0006	13.12	6.98		2022_09_06_0029	16.96	10.48		2022_09_13_0004	12.46	8.51
2022_09_08_0000	25.9	15.9		2022_09_06_0004	16.96	10.45		2022_09_07_0007	15.18	7.78		2022_09_08_0000	18.23	12.79		2022_09_13_0005	11.25	7.61
2022_09_09_0000	18.66	11.91		2022_09_06_0005	17.16	11.45		2022_09_07_0008	14.5	9.15		2022_09_07_0027	15.8	7.98		2022_09_06_0030	13.75	8.24
2022_09_09_0001	21.89	11.44		2022_09_06_0006	15.4	11.04		2022_09_07_0009	11.13	9.3		2022_09_06_0025	18.74	11.61		2022_09_06_0033	13.72	9.01
2022_09_09_0009	18.47	9.89		2022_09_06_0007	17.96	8.52		2022_09_07_0010	12.98	9.81		2022_09_07_0029	13.96	7.68		2022_09_06_0035	16.92	9.48
2022_09_09_0010	20.07	16.33		2022_09_06_0008	17.23	8.91		2022_09_07_0011	9.44	7.33		2022_09_07_0030	18.45	7.07		2022_09_08_0006	11.04	8.05
2022_09_09_0011	22.71	8.61		2022_09_06_0009	14.54	9.05		2022_09_07_0012	10.47	7.68		2022_09_07_0031	16.47	11.95		2022_09_08_0010	13.94	6.98
2022_09_13_0001	20.94	11.58		2022_09_06_0010	13.38	8.48		2022_09_07_0013	13.98	7.86		2022_09_07_0032	12.58	8.31		2022_09_08_0016	14.83	9.45
2022_09_13_0003	14.59	12.23		2022_09_06_0011	19.23	11.22		2022_09_07_0014	11.34	8.04		2022_09_07_0021	12.26	12.16		2022_09_08_0022	10.18	7.88
2022_09_13_0004	27.83	12.18		2022_09_06_0012	12.65	7.95		2022_09_07_0016	14.36	8.43
2022_09_13_0005	20.63	11.69		2022_09_06_0013	18.75	10.65
mean	21.7138	12.3654			15.92	9.46538			12.3592	7.9775			15.7682	10.0564			12.1973	8.24455
			wt vs unc-68(ns)	T.test---P value	5.36401e-05	0.000422843
wt(DMSO)					0.001
Filename	minis(HZ)	minis(amp)
2022_09_13_0006	22.33	12.15
2022_09_07_0003	25.97	10.55
2022_09_07_0004	20.26	10.23
2022_09_07_0005	12.9	10.51
2022_09_07_0006	21.42	11.59
mean	20.576	11.006

## Sheet: wt
2022_09_06_0020	2022_09_07_0000	2022_09_07_0018	2022_09_08_0000	2022_09_09_0000	2022_09_09_0001	2022_09_09_0009	2022_09_09_0010	2022_09_09_0011	2022_09_13_0001	2022_09_13_0003	2022_09_13_0004	2022_09_13_0005
70-100	30-60	20-50	30-60	30-60	30-60	35s-65s	50s-80s	20-50	60-90	50-80	40-70	20-50
-7.09958	-15.8377	-13.7667	-15.0965	-15.4324	-7.07854	-7.41474	-16.2222	-18.867	-8.23856	-6.92911	-13.4293	-7.73231		7.09958	15.8377	13.7667	15.0965	15.4324	7.07854	7.41474	16.2222	18.867	8.23856	6.92911	13.4293	7.73231
-12.5932	-8.02457	-15.9036	-12.2688	-12.6794	-9.64298	-6.25374	-20.3711	-7.59047	-7.03326	-8.68311	-7.32576	-7.21228		12.5932	8.02457	15.9036	12.2688	12.6794	9.64298	6.25374	20.3711	7.59047	7.03326	8.68311	7.32576	7.21228
-8.56556	-8.20665	-18.5894	-21.2278	-7.79465	-9.65345	-7.59472	-9.13768	-5.45375	-7.03349	-7.86949	-7.08161	-8.92088		8.56556	8.20665	18.5894	21.2278	7.79465	9.65345	7.59472	9.13768	5.45375	7.03349	7.86949	7.08161	8.92088
-7.71121	-6.37435	-10.2888	-8.46426	-10.2793	-7.16094	-6.80121	-11.5155	-5.26935	-8.13228	-6.66399	-10.2554	-11.6048		7.71121	6.37435	10.2888	8.46426	10.2793	7.16094	6.80121	11.5155	5.26935	8.13228	6.66399	10.2554	11.6048
-11.313	-14.7964	-10.8992	-7.17889	-8.2025	-8.3259	-15.1621	-31.1063	-6.91661	-16.1936	-7.11539	-12.9409	-10.5049		11.313	14.7964	10.8992	7.17889	8.2025	8.3259	15.1621	31.1063	6.91661	16.1936	7.11539	12.9409	10.5049
-9.48287	-7.41031	-8.51891	-9.74161	-10.0922	-12.0605	-8.32426	-10.84	-5.32915	-9.23764	-11.7472	-14.2836	-7.42775		9.48287	7.41031	8.51891	9.74161	10.0922	12.0605	8.32426	10.84	5.32915	9.23764	11.7472	14.2836	7.42775
-12.2299	-7.34913	-10.7162	-23.402	-7.64992	-7.97727	-6.98071	-10.8383	-5.08419	-15.6007	-15.8938	-14.8938	-8.87448		12.2299	7.34913	10.7162	23.402	7.64992	7.97727	6.98071	10.8383	5.08419	15.6007	15.8938	14.8938	8.87448
-25.2306	-19.678	-8.15278	-15.5266	-7.22132	-8.10743	-8.38281	-16.6339	-5.00883	-7.70332	-11.978	-17.5793	-9.23175		25.2306	19.678	8.15278	15.5266	7.22132	8.10743	8.38281	16.6339	5.00883	7.70332	11.978	17.5793	9.23175
-7.83576	-17.4806	-20.0549	-66.9589	-24.9784	-9.51668	-12.8961	-9.85769	-5.63491	-15.2787	-10.8666	-20.9971	-9.0938		7.83576	17.4806	20.0549	66.9589	24.9784	9.51668	12.8961	9.85769	5.63491	15.2787	10.8666	20.9971	9.0938
-7.95805	-6.92115	-15.5385	-11.524	-15.398	-9.58324	-8.50018	-14.1282	-20.9433	-12.3524	-7.81187	-8.30178	-12.4988		7.95805	6.92115	15.5385	11.524	15.398	9.58324	8.50018	14.1282	20.9433	12.3524	7.81187	8.30178	12.4988
-8.14173	-15.0997	-8.21432	-7.92113	-14.5935	-24.6063	-15.0297	-10.2217	-18.0437	-16.3911	-6.74429	-8.54589	-8.09557		8.14173	15.0997	8.21432	7.92113	14.5935	24.6063	15.0297	10.2217	18.0437	16.3911	6.74429	8.54589	8.09557
-12.8418	-7.77547	-9.07006	-11.7609	-11.7821	-9.65314	-10.7542	-41.5323	-5.5065	-12.9741	-8.08597	-7.93553	-7.33511		12.8418	7.77547	9.07006	11.7609	11.7821	9.65314	10.7542	41.5323	5.5065	12.9741	8.08597	7.93553	7.33511
-16.1994	-20.4094	-10.4142	-14.6193	-38.6914	-11.4249	-6.96798	-26.5162	-5.19488	-19.8142	-7.61822	-9.03406	-14.7768		16.1994	20.4094	10.4142	14.6193	38.6914	11.4249	6.96798	26.5162	5.19488	19.8142	7.61822	9.03406	14.7768
-20.4719	-6.55435	-8.40049	-7.64295	-12.8119	-14.9713	-6.65163	-10.0358	-5.31647	-14.2186	-10.1933	-8.30158	-10.2565		20.4719	6.55435	8.40049	7.64295	12.8119	14.9713	6.65163	10.0358	5.31647	14.2186	10.1933	8.30158	10.2565
-10.0354	-9.60402	-15.481	-7.94499	-7.23192	-9.72288	-8.29501	-14.9152	-6.64328	-12.8807	-10.9239	-8.05741	-16.4576		10.0354	9.60402	15.481	7.94499	7.23192	9.72288	8.29501	14.9152	6.64328	12.8807	10.9239	8.05741	16.4576
-19.7404	-9.11507	-17.2515	-22.9989	-12.1229	-7.84141	-10.6066	-16.1293	-10.1583	-7.14632	-14.9939	-9.64429	-13.2783		19.7404	9.11507	17.2515	22.9989	12.1229	7.84141	10.6066	16.1293	10.1583	7.14632	14.9939	9.64429	13.2783
-16.3839	-8.74883	-12.4299	-38.3157	-10.9292	-7.41775	-6.69869	-8.25432	-5.03721	-11.6666	-8.52703	-15.5036	-17.1829		16.3839	8.74883	12.4299	38.3157	10.9292	7.41775	6.69869	8.25432	5.03721	11.6666	8.52703	15.5036	17.1829
-8.57167	-11.8004	-9.25652	-15.7921	-13.1661	-13.708	-5.47467	-18.7486	-5.15383	-9.83764	-17.3992	-9.0339	-15.2231		8.57167	11.8004	9.25652	15.7921	13.1661	13.708	5.47467	18.7486	5.15383	9.83764	17.3992	9.0339	15.2231
-17.3	-6.4286	-25.5534	-14.0376	-7.10474	-10.3525	-7.42712	-23.7533	-6.93561	-7.88681	-16.4137	-8.66764	-15.2077		17.3	6.4286	25.5534	14.0376	7.10474	10.3525	7.42712	23.7533	6.93561	7.88681	16.4137	8.66764	15.2077
-18.5828	-20.7103	-8.52478	-7.44472	-13.6144	-14.5674	-7.05331	-28.512	-6.57443	-13.7483	-14.8111	-10.3765	-8.84967		18.5828	20.7103	8.52478	7.44472	13.6144	14.5674	7.05331	28.512	6.57443	13.7483	14.8111	10.3765	8.84967
-7.9631	-9.66231	-14.0183	-24.8977	-8.64829	-16.8878	-22.1244	-33.3292	-10.2896	-14.9727	-7.11773	-8.78955	-11.1527		7.9631	9.66231	14.0183	24.8977	8.64829	16.8878	22.1244	33.3292	10.2896	14.9727	7.11773	8.78955	11.1527
-19.0111	-10.0284	-17.376	-7.803	-8.00941	-9.2654	-6.30622	-10.0725	-15.8937	-9.84683	-7.36425	-7.32466	-7.97032		19.0111	10.0284	17.376	7.803	8.00941	9.2654	6.30622	10.0725	15.8937	9.84683	7.36425	7.32466	7.97032
-6.01063	-10.1487	-9.87008	-7.43476	-13.3511	-12.6294	-7.21956	-23.803	-5.21103	-21.5665	-21.778	-7.20239	-7.35269		6.01063	10.1487	9.87008	7.43476	13.3511	12.6294	7.21956	23.803	5.21103	21.5665	21.778	7.20239	7.35269
-14.7392	-7.52113	-9.93177	-8.8976	-16.4465	-10.0051	-6.60808	-21.8493	-5.12847	-14.1212	-11.5619	-9.15549	-9.41762		14.7392	7.52113	9.93177	8.8976	16.4465	10.0051	6.60808	21.8493	5.12847	14.1212	11.5619	9.15549	9.41762
-6.25542	-9.47341	-17.6834	-7.84166	-12.7135	-12.8773	-8.13163	-22.0306	-5.53934	-8.14497	-7.55622	-7.81271	-11.8573		6.25542	9.47341	17.6834	7.84166	12.7135	12.8773	8.13163	22.0306	5.53934	8.14497	7.55622	7.81271	11.8573
-6.98787	-21.0696	-13.7772	-7.78038	-7.30575	-9.40118	-11.6709	-19.7034	-5.96244	-7.29058	-11.3271	-7.8127	-8.55862		6.98787	21.0696	13.7772	7.78038	7.30575	9.40118	11.6709	19.7034	5.96244	7.29058	11.3271	7.8127	8.55862
-8.39259	-11.1817	-15.9136	-8.92419	-7.1139	-11.4216	-5.13785	-11.948	-5.04486	-10.0992	-7.06545	-8.78926	-15.009		8.39259	11.1817	15.9136	8.92419	7.1139	11.4216	5.13785	11.948	5.04486	10.0992	7.06545	8.78926	15.009
-18.5868	-6.66488	-26.2898	-14.3552	-7.54101	-9.29413	-5.25931	-19.1481	-13.3378	-12.6679	-8.64368	-21.7287	-8.29432		18.5868	6.66488	26.2898	14.3552	7.54101	9.29413	5.25931	19.1481	13.3378	12.6679	8.64368	21.7287	8.29432
-6.13578	-6.11543	-8.83451	-10.8756	-24.6854	-8.19609	-5.25558	-13.6545	-8.87246	-12.1831	-7.0512	-8.54509	-7.63921		6.13578	6.11543	8.83451	10.8756	24.6854	8.19609	5.25558	13.6545	8.87246	12.1831	7.0512	8.54509	7.63921
-9.43198	-7.27467	-15.061	-7.60482	-8.99629	-10.3336	-19.1714	-12.6165	-7.75601	-7.54453	-8.50074	-8.545	-16.2967		9.43198	7.27467	15.061	7.60482	8.99629	10.3336	19.1714	12.6165	7.75601	7.54453	8.50074	8.545	16.2967
-10.5308	-6.78425	-11.7044	-8.11899	-12.3459	-23.7617	-7.32894	-10.785	-18.0671	-9.02489	-9.84008	-10.0097	-8.74198		10.5308	6.78425	11.7044	8.11899	12.3459	23.7617	7.32894	10.785	18.0671	9.02489	9.84008	10.0097	8.74198
-11.0815	-8.43172	-14.3296	-8.291	-8.36387	-13.7599	-5.00958	-8.89026	-9.12102	-15.4981	-20.4586	-10.6201	-14.8393		11.0815	8.43172	14.3296	8.291	8.36387	13.7599	5.00958	8.89026	9.12102	15.4981	20.4586	10.6201	14.8393
-17.8565	-6.84479	-10.1185	-17.75	-10.7681	-7.96376	-6.89882	-25.9123	-6.67502	-7.07821	-6.90373	-8.05646	-10.4351		17.8565	6.84479	10.1185	17.75	10.7681	7.96376	6.89882	25.9123	6.67502	7.07821	6.90373	8.05646	10.4351
-6.13778	-9.40807	-9.2032	-15.8566	-27.7304	-10.7721	-12.2685	-11.6812	-5.02584	-31.9825	-19.3534	-14.16	-9.92579		6.13778	9.40807	9.2032	15.8566	27.7304	10.7721	12.2685	11.6812	5.02584	31.9825	19.3534	14.16	9.92579
-14.6223	-25.3366	-18.908	-13.1705	-7.58567	-12.055	-5.06391	-10.5819	-29.9798	-12.6965	-12.8655	-8.30057	-7.70585		14.6223	25.3366	18.908	13.1705	7.58567	12.055	5.06391	10.5819	29.9798	12.6965	12.8655	8.30057	7.70585
-6.01637	-10.8712	-8.41003	-8.16465	-9.78274	-10.8958	-5.30392	-13.4492	-5.25641	-9.66177	-7.61467	-15.3806	-14.6609		6.01637	10.8712	8.41003	8.16465	9.78274	10.8958	5.30392	13.4492	5.25641	9.66177	7.61467	15.3806	14.6609
-6.19978	-20.696	-8.71661	-7.3689	-7.81304	-11.5077	-20.1945	-10.0285	-6.59775	-13.4549	-32.9999	-9.15502	-12.6871		6.19978	20.696	8.71661	7.3689	7.81304	11.5077	20.1945	10.0285	6.59775	13.4549	32.9999	9.15502	12.6871
-13.0979	-7.20613	-19.9473	-7.12389	-9.45371	-15.7221	-21.9618	-16.131	-5.47711	-13.4681	-6.7544	-7.81202	-16.0741		13.0979	7.20613	19.9473	7.12389	9.45371	15.7221	21.9618	16.131	5.47711	13.4681	6.7544	7.81202	16.0741
-11.3283	-26.8594	-14.5153	-9.18824	-11.8893	-8.94786	-5.70958	-12.2855	-6.07403	-8.46345	-8.82884	-8.30027	-10.1884		11.3283	26.8594	14.5153	9.18824	11.8893	8.94786	5.70958	12.2855	6.07403	8.46345	8.82884	8.30027	10.1884
-7.8501	-12.2715	-10.6703	-18.7006	-15.1249	-11.4507	-10.345	-14.9671	-5.44833	-8.34944	-10.7764	-14.2816	-11.642		7.8501	12.2715	10.6703	18.7006	15.1249	11.4507	10.345	14.9671	5.44833	8.34944	10.7764	14.2816	11.642
-12.7942	-8.05802	-8.29009	-17.4142	-7.73615	-9.13403	-11.9889	-28.7589	-6.76786	-10.9146	-8.32306	-12.8168	-9.4441		12.7942	8.05802	8.29009	17.4142	7.73615	9.13403	11.9889	28.7589	6.76786	10.9146	8.32306	12.8168	9.4441
-18.8979	-9.82604	-13.3562	-8.37822	-8.04108	-11.0873	-9.48381	-11.6685	-9.96681	-11.8917	-8.4438	-14.6478	-7.84446		18.8979	9.82604	13.3562	8.37822	8.04108	11.0873	9.48381	11.6685	9.96681	11.8917	8.4438	14.6478	7.84446
-11.6961	-7.01724	-12.4408	-7.94553	-9.31279	-15.4226	-5.27051	-8.42853	-5.68784	-17.8863	-8.55309	-8.30013	-7.96625		11.6961	7.01724	12.4408	7.94553	9.31279	15.4226	5.27051	8.42853	5.68784	17.8863	8.55309	8.30013	7.96625
-14.3822	-16.6598	-10.1831	-7.94407	-11.2654	-15.6081	-5.20721	-30.3964	-5.3023	-9.46671	-23.4286	-13.9153	-7.71924		14.3822	16.6598	10.1831	7.94407	11.2654	15.6081	5.20721	30.3964	5.3023	9.46671	23.4286	13.9153	7.71924
-6.50971	-6.83315	-10.7324	-15.8023	-14.9261	-8.77295	-11.369	-10.6766	-7.54436	-36.0806	-12.5549	-14.7697	-7.09572		6.50971	6.83315	10.7324	15.8023	14.9261	8.77295	11.369	10.6766	7.54436	36.0806	12.5549	14.7697	7.09572
-10.8435	-10.0068	-26.237	-11.7726	-7.05218	-9.44458	-24.9791	-18.1797	-7.12551	-21.6814	-14.1356	-9.03244	-21.345		10.8435	10.0068	26.237	11.7726	7.05218	9.44458	24.9791	18.1797	7.12551	21.6814	14.1356	9.03244	21.345
-6.08284	-14.9501	-9.63583	-13.646	-8.62879	-28.8541	-9.41393	-13.9663	-6.79628	-15.9452	-6.93122	-12.4503	-7.39657		6.08284	14.9501	9.63583	13.646	8.62879	28.8541	9.41393	13.9663	6.79628	15.9452	6.93122	12.4503	7.39657
-7.79194	-9.21223	-18.7914	-25.9128	-8.22946	-7.73914	-6.9723	-54.1883	-11.0221	-8.74429	-17.0534	-7.81162	-16.91		7.79194	9.21223	18.7914	25.9128	8.22946	7.73914	6.9723	54.1883	11.0221	8.74429	17.0534	7.81162	16.91
-14.9951	-28.7431	-11.2842	-48.4937	-10.3572	-12.3192	-5.3829	-21.4727	-11.5	-7.66145	-31.8037	-11.9618	-7.74659		14.9951	28.7431	11.2842	48.4937	10.3572	12.3192	5.3829	21.4727	11.5	7.66145	31.8037	11.9618	7.74659
-7.73251	-9.76099	-37.1021	-11.5009	-9.13352	-19.1588	-8.67753	-10.1805	-18.2322	-12.9113	-7.50113	-8.29966	-7.13611		7.73251	9.76099	37.1021	11.5009	9.13352	19.1588	8.67753	10.1805	18.2322	12.9113	7.50113	8.29966	7.13611
-22.5655	-6.89199	-10.7969	-24.68	-16.3839	-13.6661	-11.1673	-10.6666	-11.6396	-9.73816	-9.19794	-12.9383	-8.06237		22.5655	6.89199	10.7969	24.68	16.3839	13.6661	11.1673	10.6666	11.6396	9.73816	9.19794	12.9383	8.06237
-8.46691	-41.5599	-12.14	-19.0633	-8.06802	-7.25789	-13.6085	-9.38458	-16.1354	-17.0658	-26.8953	-9.27617	-14.0291		8.46691	41.5599	12.14	19.0633	8.06802	7.25789	13.6085	9.38458	16.1354	17.0658	26.8953	9.27617	14.0291
-7.30835	-21.1126	-39.545	-10.8801	-23.4253	-9.33526	-19.8307	-17.6848	-5.0873	-22.4465	-14.198	-7.81131	-9.49817		7.30835	21.1126	39.545	10.8801	23.4253	9.33526	19.8307	17.6848	5.0873	22.4465	14.198	7.81131	9.49817
-6.02663	-7.01336	-8.23425	-12.8853	-14.4942	-21.301	-9.1471	-14.2625	-5.38747	-8.28762	-17.4923	-12.4498	-15.3487		6.02663	7.01336	8.23425	12.8853	14.4942	21.301	9.1471	14.2625	5.38747	8.28762	17.4923	12.4498	15.3487
-6.2122	-8.72228	-10.0656	-21.0025	-18.5441	-8.606	-23.7319	-27.6257	-7.63348	-37.5901	-36.6568	-8.78767	-7.04385		6.2122	8.72228	10.0656	21.0025	18.5441	8.606	23.7319	27.6257	7.63348	37.5901	36.6568	8.78767	7.04385
-6.88425	-8.29496	-16.3525	-13.6774	-8.26421	-13.4303	-7.31322	-29.4532	-5.30461	-18.3038	-6.87135	-15.3795	-8.34076		6.88425	8.29496	16.3525	13.6774	8.26421	13.4303	7.31322	29.4532	5.30461	18.3038	6.87135	15.3795	8.34076
-7.92244	-6.58586	-9.51666	-15.1403	-8.50525	-8.73066	-12.3118	-11.5607	-5.32621	-10.13	-19.5625	-8.29938	-22.4947		7.92244	6.58586	9.51666	15.1403	8.50525	8.73066	12.3118	11.5607	5.32621	10.13	19.5625	8.29938	22.4947
-9.75439	-7.25629	-12.0814	-13.9788	-7.10066	-7.15281	-8.5844	-12.2904	-6.2161	-9.89139	-8.08421	-22.8257	-12.8343		9.75439	7.25629	12.0814	13.9788	7.10066	7.15281	8.5844	12.2904	6.2161	9.89139	8.08421	22.8257	12.8343
-8.71695	-13.7867	-10.1288	-9.58306	-16.7368	-7.40163	-8.70266	-10.2702	-6.21021	-11.4787	-27.4887	-8.42137	-15.03		8.71695	13.7867	10.1288	9.58306	16.7368	7.40163	8.70266	10.2702	6.21021	11.4787	27.4887	8.42137	15.03
-10.9144	-6.94866	-14.219	-8.03121	-14.9047	-12.6522	-15.6543	-23.5144	-10.9051	-12.7134	-11.9801	-7.32268	-9.65213		10.9144	6.94866	14.219	8.03121	14.9047	12.6522	15.6543	23.5144	10.9051	12.7134	11.9801	7.32268	9.65213
-57.4233	-6.15514	-24.4733	-12.4252	-13.8659	-18.8181	-5.76646	-9.90005	-8.45953	-9.41653	-26.626	-10.4964	-10.4986		57.4233	6.15514	24.4733	12.4252	13.8659	18.8181	5.76646	9.90005	8.45953	9.41653	26.626	10.4964	10.4986
-8.35172	-12.5624	-13.6708	-10.3476	-8.84234	-20.5919	-12.5381	-8.91724	-22.8722	-8.67118	-8.07072	-10.7406	-7.31679		8.35172	12.5624	13.6708	10.3476	8.84234	20.5919	12.5381	8.91724	22.8722	8.67118	8.07072	10.7406	7.31679
-7.74203	-16.7128	-9.39865	-11.6837	-9.56484	-7.28752	-6.73553	-21.6121	-5.17779	-9.52456	-9.16571	-28.3187	-19.5231		7.74203	16.7128	9.39865	11.6837	9.56484	7.28752	6.73553	21.6121	5.17779	9.52456	9.16571	28.3187	19.5231
-24.9543	-8.5325	-14.2816	-9.11956	-19.0461	-8.93728	-8.31745	-19.8415	-6.09057	-18.0687	-6.72098	-15.0128	-8.6435		24.9543	8.5325	14.2816	9.11956	19.0461	8.93728	8.31745	19.8415	6.09057	18.0687	6.72098	15.0128	8.6435
-10.5505	-6.88423	-29.6631	-8.63712	-13.9767	-12.7839	-5.3853	-10.5596	-5.59976	-9.76393	-7.81788	-13.67	-11.4486		10.5505	6.88423	29.6631	8.63712	13.9767	12.7839	5.3853	10.5596	5.59976	9.76393	7.81788	13.67	11.4486
-12.8095	-35.9359	-9.58255	-8.26143	-11.9436	-12.7284	-9.16503	-23.925	-6.68797	-14.0344	-15.3793	-7.32231	-10.3192		12.8095	35.9359	9.58255	8.26143	11.9436	12.7284	9.16503	23.925	6.68797	14.0344	15.3793	7.32231	10.3192
-7.56082	-10.2391	-17.3341	-18.6351	-10.3896	-7.72824	-5.80299	-15.8019	-5.63996	-15.863	-13.9061	-10.496	-8.45452		7.56082	10.2391	17.3341	18.6351	10.3896	7.72824	5.80299	15.8019	5.63996	15.863	13.9061	10.496	8.45452
-6.46221	-6.81778	-12.3294	-18.7437	-12.368	-14.3812	-5.55478	-9.50793	-6.29702	-9.63672	-8.7753	-11.1064	-10.627		6.46221	6.81778	12.3294	18.7437	12.368	14.3812	5.55478	9.50793	6.29702	9.63672	8.7753	11.1064	10.627
-6.95052	-8.6473	-33.4476	-15.8738	-7.29748	-10.4179	-5.00209	-19.6364	-8.41899	-12.1999	-6.94307	-11.2284	-13.6483		6.95052	8.6473	33.4476	15.8738	7.29748	10.4179	5.00209	19.6364	8.41899	12.1999	6.94307	11.2284	13.6483
-18.121	-12.7971	-8.48441	-11.7134	-13.6963	-8.03872	-9.94356	-8.58272	-5.27992	-10.9756	-14.022	-7.32215	-12.7339		18.121	12.7971	8.48441	11.7134	13.6963	8.03872	9.94356	8.58272	5.27992	10.9756	14.022	7.32215	12.7339
-10.6141	-6.32733	-21.241	-7.11778	-11.488	-7.80049	-9.37976	-19.2006	-5.09661	-11.7071	-6.94126	-13.3035	-7.1053		10.6141	6.32733	21.241	7.11778	11.488	7.80049	9.37976	19.2006	5.09661	11.7071	6.94126	13.3035	7.1053
-8.60016	-11.2097	-9.09521	-14.4757	-9.59394	-7.68013	-6.14194	-19.3831	-5.70298	-14.6351	-15.8456	-9.64135	-8.79929		8.60016	11.2097	9.09521	14.4757	9.59394	7.68013	6.14194	19.3831	5.70298	14.6351	15.8456	9.64135	8.79929
-13.3609	-18.2895	-9.64464	-57.5824	-9.37318	-7.06984	-8.27779	-41.4164	-12.46	-8.76626	-7.17637	-14.28	-11.606		13.3609	18.2895	9.64464	57.5824	9.37318	7.06984	8.27779	41.4164	12.46	8.76626	7.17637	14.28	11.606
-6.15919	-12.3076	-9.2175	-60.9796	-13.9892	-15.1301	-6.13825	-27.3166	-5.42567	-8.13192	-9.12359	-9.39716	-17.9324		6.15919	12.3076	9.2175	60.9796	13.9892	15.1301	6.13825	27.3166	5.42567	8.13192	9.12359	9.39716	17.9324
-20.2602	-6.32616	-11.7817	-16.9033	-9.30726	-12.2011	-12.2398	-9.42942	-7.00367	-7.38689	-27.9202	-8.29853	-10.0796		20.2602	6.32616	11.7817	16.9033	9.30726	12.2011	12.2398	9.42942	7.00367	7.38689	27.9202	8.29853	10.0796
-16.6593	-8.278	-9.2185	-33.5033	-7.65274	-14.5206	-11.503	-35.4249	-6.60703	-7.87455	-10.5839	-7.19988	-7.74741		16.6593	8.278	9.2185	33.5033	7.65274	14.5206	11.503	35.4249	6.60703	7.87455	10.5839	7.19988	7.74741
-12.021	-6.14153	-19.3507	-7.68378	-13.7525	-7.99008	-8.67352	-13.0836	-5.13581	-13.8525	-14.8437	-32.7125	-8.23547		12.021	6.14153	19.3507	7.68378	13.7525	7.99008	8.67352	13.0836	5.13581	13.8525	14.8437	32.7125	8.23547
-16.4163	-7.48303	-17.947	-10.6373	-12.15	-7.25855	-5.67528	-22.2931	-15.5034	-10.6731	-9.09898	-7.32191	-8.3256		16.4163	7.48303	17.947	10.6373	12.15	7.25855	5.67528	22.2931	15.5034	10.6731	9.09898	7.32191	8.3256
-9.70306	-10.4125	-12.0266	-13.504	-7.1358	-19.7711	-14.9492	-54.3974	-6.69377	-13.3557	-13.1271	-7.68807	-7.10467		9.70306	10.4125	12.0266	13.504	7.1358	19.7711	14.9492	54.3974	6.69377	13.3557	13.1271	7.68807	7.10467
-6.52937	-7.11559	-23.5628	-40.6026	-8.22527	-7.50373	-16.9016	-9.22809	-26.7302	-7.12605	-7.50921	-11.2281	-9.90735		6.52937	7.11559	23.5628	40.6026	8.22527	7.50373	16.9016	9.22809	26.7302	7.12605	7.50921	11.2281	9.90735
-12.8772	-19.7497	-17.4594	-11.3572	-18.0479	-11.0487	-5.54865	-10.3848	-5.73548	-25.5582	-7.4874	-9.03074	-18.3084		12.8772	19.7497	17.4594	11.3572	18.0479	11.0487	5.54865	10.3848	5.73548	25.5582	7.4874	9.03074	18.3084
-6.77423	-14.8043	-8.18228	-19.7162	-10.9963	-8.54737	-23.3021	-26.4364	-12.3922	-10.2928	-11.3934	-9.51897	-13.4233		6.77423	14.8043	8.18228	19.7162	10.9963	8.54737	23.3021	26.4364	12.3922	10.2928	11.3934	9.51897	13.4233
-6.16553	-10.1039	-15.8121	-36.9149	-15.8616	-23.8065	-7.3712	-33.4503	-12.471	-14.9243	-7.48257	-7.19959	-8.15672		6.16553	10.1039	15.8121	36.9149	15.8616	23.8065	7.3712	33.4503	12.471	14.9243	7.48257	7.19959	8.15672
-7.8746	-9.18804	-9.9528	-7.84255	-10.4233	-8.30506	-32.6982	-16.4707	-8.45119	-10.4054	-9.41492	-12.4486	-12.2974		7.8746	9.18804	9.9528	7.84255	10.4233	8.30506	32.6982	16.4707	8.45119	10.4054	9.41492	12.4486	12.2974
-6.532	-6.197	-10.9904	-32.5942	-27.8438	-8.30568	-7.36807	-8.16976	-8.37796	-7.22287	-7.70153	-7.56578	-7.76452		6.532	6.197	10.9904	32.5942	27.8438	8.30568	7.36807	8.16976	8.37796	7.22287	7.70153	7.56578	7.76452
-14.225	-6.37991	-9.46468	-25.253	-9.01127	-9.77151	-11.578	-8.04582	-6.15979	-7.58896	-6.84605	-7.56577	-11.7922		14.225	6.37991	9.46468	25.253	9.01127	9.77151	11.578	8.04582	6.15979	7.58896	6.84605	7.56577	11.7922
-24.2964	-6.62403	-16.667	-7.00031	-15.2855	-9.6516	-5.89879	-10.7265	-11.5785	-8.19187	-7.57802	-7.4437	-13.8559		24.2964	6.62403	16.667	7.00031	15.2855	9.6516	5.89879	10.7265	11.5785	8.19187	7.57802	7.4437	13.8559
-6.53551	-14.5581	-19.4137	-16.4532	-10.3373	-12.4607	-16.333	-18.4668	-5.65575	-8.78871	-12.8235	-13.5471	-40.6881		6.53551	14.5581	19.4137	16.4532	10.3373	12.4607	16.333	18.4668	5.65575	8.78871	12.8235	13.5471	40.6881
-15.9352	-6.56235	-33.3909	-19.1991	-8.25967	-10.9971	-5.10135	-11.5664	-5.62388	-7.3227	-9.76953	-10.3733	-17.3455		15.9352	6.56235	33.3909	19.1991	8.25967	10.9971	5.10135	11.5664	5.62388	7.3227	9.76953	10.3733	17.3455
-6.41382	-6.31818	-8.24449	-20.8287	-13.8615	-10.1483	-9.48789	-19.0058	-8.3438	-12.6906	-9.64631	-8.90843	-16.9709		6.41382	6.31818	8.24449	20.8287	13.8615	10.1483	9.48789	19.0058	8.3438	12.6906	9.64631	8.90843	16.9709
-10.5654	-7.72197	-10.2591	-23.9916	-7.36708	-12.5323	-11.9239	-8.74939	-8.73863	-11.7131	-23.44	-15.6222	-11.0942		10.5654	7.72197	10.2591	23.9916	7.36708	12.5323	11.9239	8.74939	8.73863	11.7131	23.44	15.6222	11.0942
-12.3975	-6.31806	-13.1892	-10.99	-15.1158	-10.0915	-11.0688	-13.9975	-6.34654	-16.4637	-10.9865	-10.3731	-8.57344		12.3975	6.31806	13.1892	10.99	15.1158	10.0915	11.0688	13.9975	6.34654	16.4637	10.9865	10.3731	8.57344
-18.9286	-6.1344	-12.824	-23.0079	-23.816	-19.437	-6.79438	-22.8469	-24.0035	-10.9634	-16.8262	-8.17581	-7.35195		18.9286	6.1344	12.824	23.0079	23.816	19.437	6.79438	22.8469	24.0035	10.9634	16.8262	8.17581	7.35195
-7.88136	-6.56163	-14.3505	-17.6806	-18.2541	-11.5031	-5.9975	-8.07011	-12.3796	-7.89611	-10.7133	-8.66408	-7.3368		7.88136	6.56163	14.3505	17.6806	18.2541	11.5031	5.9975	8.07011	12.3796	7.89611	10.7133	8.66408	7.3368
-13.8019	-16.0824	-22.6514	-15.4206	-11.9012	-11.8109	-8.67866	-24.9765	-5.28681	-13.3885	-7.88952	-7.44327	-14.8985		13.8019	16.0824	22.6514	15.4206	11.9012	11.8109	8.67866	24.9765	5.28681	13.3885	7.88952	7.44327	14.8985
-11.6057	-13.2136	-8.49139	-10.1705	-9.44554	-11.7501	-14.4116	-11.0506	-12.7579	-24.9826	-19.3635	-8.78601	-7.19453		11.6057	13.2136	8.49139	10.1705	9.44554	11.7501	14.4116	11.0506	12.7579	24.9826	19.3635	8.78601	7.19453
-8.43192	-6.68207	-11.3601	-14.8063	-10.0391	-8.0915	-7.26987	-9.45472	-6.9583	-14.846	-22.8908	-11.3495	-8.28154		8.43192	6.68207	11.3601	14.8063	10.0391	8.0915	7.26987	9.45472	6.9583	14.846	22.8908	11.3495	8.28154
-14.4748	-6.86475	-10.6888	-10.3922	-7.89831	-7.35989	-71.3498	-15.6783	-5.06018	-19.2026	-13.3426	-25.7537	-9.00669		14.4748	6.86475	10.6888	10.3922	7.89831	7.35989	71.3498	15.6783	5.06018	19.2026	13.3426	25.7537	9.00669
-12.8882	-17.4836	-10.5058	-33.9868	-16.3145	-13.525	-16.6594	-17.0795	-5.34678	-11.6298	-11.2673	-13.7908	-7.41952		12.8882	17.4836	10.5058	33.9868	16.3145	13.525	16.6594	17.0795	5.34678	11.6298	11.2673	13.7908	7.41952
-8.98465	-6.12909	-14.5953	-13.1617	-18.1398	-7.60544	-7.99046	-14.5158	-5.1451	-10.529	-6.62337	-12.448	-7.4188		8.98465	6.12909	14.5953	13.1617	18.1398	7.60544	7.99046	14.5158	5.1451	10.529	6.62337	12.448	7.4188
-6.60489	-13.5753	-10.2009	-8.21251	-18.0685	-7.97197	-11.8355	-18.2996	-6.04696	-7.96076	-6.86708	-10.0066	-32.4914		6.60489	13.5753	10.2009	8.21251	18.0685	7.97197	11.8355	18.2996	6.04696	7.96076	6.86708	10.0066	32.4914
-12.7085	-10.5843	-15.2674	-22.5944	-8.11723	-7.97288	-5.36494	-15.7911	-5.67855	-14.6798	-6.86705	-7.68718	-9.3753		12.7085	10.5843	15.2674	22.5944	8.11723	7.97288	5.36494	15.7911	5.67855	14.6798	6.86705	7.68718	9.3753
-8.92598	-8.26288	-14.535	-7.9672	-9.06518	-11.8187	-5.24284	-9.13535	-12.6344	-7.40259	-7.59939	-9.76232	-8.39193		8.92598	8.26288	14.535	7.9672	9.06518	11.8187	5.24284	9.13535	12.6344	7.40259	7.59939	9.76232	8.39193
-11.3686	-12.9013	-8.37113	-38.6484	-16.1923	-7.00099	-6.09729	-21.0977	-5.67194	-12.7012	-26.8824	-9.64021	-9.9728		11.3686	12.9013	8.37113	38.6484	16.1923	7.00099	6.09729	21.0977	5.67194	12.7012	26.8824	9.64021	9.9728
-6.54777	-15.4645	-11.301	-20.0873	-9.71584	-9.9335	-9.44988	-14.8718	-11.0948	-12.3618	-7.71639	-8.54157	-11.0656		6.54777	15.4645	11.301	20.0873	9.71584	9.9335	9.44988	14.8718	11.0948	12.3618	7.71639	8.54157	11.0656
-16.741	-12.9614	-15.0855	-27.573	-9.19786	-7.1882	-27.0209	-20.3038	-6.37599	-7.33489	-7.34731	-16.3541	-8.61311		16.741	12.9614	15.0855	27.573	9.19786	7.1882	27.0209	20.3038	6.37599	7.33489	7.34731	16.3541	8.61311
-41.9495	-6.85739	-10.5691	-21.7728	-18.7996	-7.18891	-9.19546	-32.8092	-5.7934	-7.70897	-11.7311	-7.19872	-15.4273		41.9495	6.85739	10.5691	21.7728	18.7996	7.18891	9.19546	32.8092	5.7934	7.70897	11.7311	7.19872	15.4273
-6.85481	-6.36831	-11.7905	-11.8802	-7.0178	-11.1608	-12.2991	-24.0804	-7.47048	-18.7069	-9.03513	-7.93114	-7.19449		6.85481	6.36831	11.7905	11.8802	7.0178	11.1608	12.2991	24.0804	7.47048	18.7069	9.03513	7.93114	7.19449
-8.07578	-6.00206	-15.6969	-19.4222	-12.5098	-10.8585	-8.45231	-15.1071	-8.26229	-7.47914	-12.8171	-12.5698	-7.68018		8.07578	6.00206	15.6969	19.4222	12.5098	10.8585	8.45231	15.1071	8.26229	7.47914	12.8171	12.5698	7.68018
-6.73368	-6.36784	-11.1193	-11.2362	-15.9883	-16.2911	-8.56296	-14.9233	-6.96225	-12.8752	-6.71282	-10.4946	-9.01549		6.73368	6.36784	11.1193	11.2362	15.9883	16.2911	8.56296	14.9233	6.96225	12.8752	6.71282	10.4946	9.01549
-6.00127	-8.25898	-12.7062	-12.4532	-7.99219	-8.9678	-19.8542	-12.1155	-5.67996	-7.06036	-6.70501	-9.51798	-11.9363		6.00127	8.25898	12.7062	12.4532	7.99219	8.9678	19.8542	12.1155	5.67996	7.06036	6.70501	9.51798	11.9363
-6.00129	-29.4377	-11.9741	-13.4744	-10.5987	-7.19808	-17.654	-8.51258	-5.10166	-9.71898	-6.70181	-12.2034	-9.24687		6.00129	29.4377	11.9741	13.4744	10.5987	7.19808	17.654	8.51258	5.10166	9.71898	6.70181	12.2034	9.24687
-16.0738	-6.67132	-23.693	-13.2804	-15.4719	-10.0693	-5.26187	-9.91503	-8.45713	-11.229	-10.3556	-11.1048	-13.999		16.0738	6.67132	23.693	13.2804	15.4719	10.0693	5.26187	9.91503	8.45713	11.229	10.3556	11.1048	13.999
-12.4124	-8.256	-14.6599	-9.06443	-16.2602	-9.88638	-5.44185	-17.3595	-5.28284	-14.6842	-53.1996	-11.1048	-8.42202		12.4124	8.256	14.6599	9.06443	16.2602	9.88638	5.44185	17.3595	5.28284	14.6842	53.1996	11.1048	8.42202
-6.06478	-15.2126	-8.67877	-13.08	-7.21904	-11.4132	-9.16284	-13.2657	-6.97964	-7.60584	-7.05227	-14.4007	-9.78286		6.06478	15.2126	8.67877	13.08	7.21904	11.4132	9.16284	13.2657	6.97964	7.60584	7.05227	14.4007	9.78286
-6.55345	-13.8695	-12.8911	-10.1468	-7.15444	-20.4479	-33.1477	-9.47638	-5.75353	-12.9193	-6.80058	-23.4339	-13.8623		6.55345	13.8695	12.8911	10.1468	7.15444	20.4479	33.1477	9.47638	5.75353	12.9193	6.80058	23.4339	13.8623
-10.338	-12.0379	-21.6199	-15.5595	-10.9054	-25.4533	-7.31605	-16.6155	-5.80133	-9.23093	-14.6075	-10.8606	-17.1069		10.338	12.0379	21.6199	15.5595	10.9054	25.4533	7.31605	16.6155	5.80133	9.23093	14.6075	10.8606	17.1069
-13.3907	-6.42263	-9.7198	-18.1781	-7.72697	-13.3687	-11.2827	-9.96134	-5.7399	-17.9633	-12.1581	-12.6917	-7.07406		13.3907	6.42263	9.7198	18.1781	7.72697	13.3687	11.2827	9.96134	5.7399	17.9633	12.1581	12.6917	7.07406
-7.16538	-6.30049	-17.7155	-20.4354	-7.5427	-9.8933	-5.84904	-8.11713	-8.36148	-28.1279	-30.0989	-7.1985	-7.72806		7.16538	6.30049	17.7155	20.4354	7.5427	9.8933	5.84904	8.11713	8.36148	28.1279	30.0989	7.1985	7.72806
-12.6609	-20.9489	-20.279	-9.85761	-11.5526	-14.8379	-6.70283	-8.11632	-33.3203	-10.7338	-7.87763	-8.90737	-8.76855		12.6609	20.9489	20.279	9.85761	11.5526	14.8379	6.70283	8.11632	33.3203	10.7338	7.87763	8.90737	8.76855
-8.93872	-17.7132	-9.72006	-8.99625	-7.76181	-8.12506	-11.6463	-15.2552	-10.7844	-13.9916	-7.63345	-10.2501	-35.416		8.93872	17.7132	9.72006	8.99625	7.76181	8.12506	11.6463	15.2552	10.7844	13.9916	7.63345	10.2501	35.416
-17.9733	-9.41196	-8.49948	-8.1318	-9.52711	-7.8225	-6.51702	-14.8247	-5.35203	-19.1947	-9.58619	-17.086	-9.72159		17.9733	9.41196	8.49948	8.1318	9.52711	7.8225	6.51702	14.8247	5.35203	19.1947	9.58619	17.086	9.72159
-10.9573	-6.237	-22.843	-10.5072	-21.3502	-10.7529	-7.18809	-10.1806	-5.39821	-9.31765	-31.6747	-9.15121	-7.31008		10.9573	6.237	22.843	10.5072	21.3502	10.7529	7.18809	10.1806	5.39821	9.31765	31.6747	9.15121	7.31008
-28.109	-7.03042	-24.43	-11.1512	-27.4998	-7.27554	-8.8956	-27.814	-5.33709	-14.6387	-9.69903	-23.0671	-14.9054		28.109	7.03042	24.43	11.1512	27.4998	7.27554	8.8956	27.814	5.33709	14.6387	9.69903	23.0671	14.9054
-6.62497	-9.53273	-13.3216	-24.3953	-16.0799	-8.8628	-31.4127	-19.8164	-5.0875	-11.8828	-9.08799	-7.19797	-30.8103		6.62497	9.53273	13.3216	24.3953	16.0799	8.8628	31.4127	19.8164	5.0875	11.8828	9.08799	7.19797	30.8103
-12.1794	-8.55489	-10.5751	-18.3448	-8.0823	-19.2407	-13.9543	-19.9927	-6.61205	-14.5301	-7.25628	-8.66278	-8.24164		12.1794	8.55489	10.5751	18.3448	8.0823	19.2407	13.9543	19.9927	6.61205	14.5301	7.25628	8.66278	8.24164
-12.2409	-6.05244	-10.637	-11.0173	-7.40759	-14.9686	-14.0106	-8.88047	-5.45053	-22.1862	-9.08291	-8.66268	-11.9514		12.2409	6.05244	10.637	11.0173	7.40759	14.9686	14.0106	8.88047	5.45053	22.1862	9.08291	8.66268	11.9514
-7.17552	-22.9566	-8.07447	-15.994	-31.2534	-15.4597	-8.08805	-21.0859	-35.8448	-9.46285	-6.88351	-13.5455	-8.55596		7.17552	22.9566	8.07447	15.994	31.2534	15.4597	8.08805	21.0859	35.8448	9.46285	6.88351	13.5455	8.55596
-9.617	-10.5049	-13.019	-12.2685	-26.4256	-9.78476	-5.82676	-16.3835	-5.85746	-8.17373	-6.88347	-51.6314	-19.1797		9.617	10.5049	13.019	12.2685	26.4256	9.78476	5.82676	16.3835	5.85746	8.17373	6.88347	51.6314	19.1797
-6.99275	-7.94139	-9.05192	-8.96599	-8.16869	-7.77075	-9.36002	-17.4768	-6.77253	-11.0389	-6.87781	-18.1841	-7.14663		6.99275	7.94139	9.05192	8.96599	8.16869	7.77075	9.36002	17.4768	6.77253	11.0389	6.87781	18.1841	7.14663
-11.9982	-14.7773	-23.5784	-22.1425	-7.62645	-9.29964	-13.7541	-28.5832	-6.03996	-15.7201	-15.2944	-22.9447	-9.85225		11.9982	14.7773	23.5784	22.1425	7.62645	9.29964	13.7541	28.5832	6.03996	15.7201	15.2944	22.9447	9.85225
-8.88568	-13.3119	-19.6723	-9.53614	-12.4394	-17.6619	-5.8151	-21.8692	-5.36797	-10.6028	-6.74549	-24.5316	-7.0538		8.88568	13.3119	19.6723	9.53614	12.4394	17.6619	5.8151	21.8692	5.36797	10.6028	6.74549	24.5316	7.0538
-7.7876	-6.04708	-18.9404	-27.6617	-9.72798	-9.48573	-9.41325	-12.2863	-5.85508	-13.3303	-7.23372	-21.6018	-11.0849		7.7876	6.04708	18.9404	27.6617	9.72798	9.48573	9.41325	12.2863	5.85508	13.3303	7.23372	21.6018	11.0849
-6.01806	-6.28739	-8.99255	-11.7727	-10.8853	-16.5682	-10.2668	-8.13409	-5.85065	-7.09938	-6.62094	-9.51681	-10.1686		6.01806	6.28739	8.99255	11.7727	10.8853	16.5682	10.2668	8.13409	5.85065	7.09938	6.62094	9.51681	10.1686
-7.11797	-7.5679	-12.8378	-20.0046	-10.6957	-10.1646	-11.0565	-21.4361	-6.9488	-9.28644	-19.6811	-11.4699	-9.32319		7.11797	7.5679	12.8378	20.0046	10.6957	10.1646	11.0565	21.4361	6.9488	9.28644	19.6811	11.4699	9.32319
-11.8189	-7.92161	-14.9743	-15.0362	-24.2299	-12.3071	-16.9668	-18.0785	-9.20344	-7.33215	-6.6166	-14.5217	-10.7764		11.8189	7.92161	14.9743	15.0362	24.2299	12.3071	16.9668	18.0785	9.20344	7.33215	6.6166	14.5217	10.7764
-12.4319	-12.6665	-11.6787	-31.9422	-7.25342	-16.8238	-5.11707	-14.5372	-7.29705	-8.3085	-13.574	-7.31925	-8.4568		12.4319	12.6665	11.6787	31.9422	7.25342	16.8238	5.11707	14.5372	7.29705	8.3085	13.574	7.31925	8.4568
-6.63502	-6.86531	-11.6178	-13.9316	-31.4727	-7.66941	-5.05601	-12.6447	-14.1875	-55.305	-11.4934	-7.5633	-19.0713		6.63502	6.86531	11.6178	13.9316	31.4727	7.66941	5.05601	12.6447	14.1875	55.305	11.4934	7.5633	19.0713
-26.4715	-26.3887	-11.4351	-10.3239	-11.5649	-10.4778	-5.60237	-26.8634	-5.27499	-22.7122	-6.60867	-9.76056	-9.18226		26.4715	26.3887	11.4351	10.3239	11.5649	10.4778	5.60237	26.8634	5.27499	22.7122	6.60867	9.76056	9.18226
-6.26889	-6.61259	-14.3038	-25.3772	-7.83742	-11.8834	-14.4496	-9.03589	-8.99762	-7.57493	-15.7621	-8.29564	-9.77656		6.26889	6.61259	14.3038	25.3772	7.83742	11.8834	14.4496	9.03589	8.99762	7.57493	15.7621	8.29564	9.77656
-8.40691	-9.72322	-12.7783	-13.1434	-17.0011	-11.6394	-6.56972	-24.2932	-5.09087	-10.9925	-14.0497	-7.19698	-17.0848		8.40691	9.72322	12.7783	13.1434	17.0011	11.6394	6.56972	24.2932	5.09087	10.9925	14.0497	7.19698	17.0848
-10.1165	-11.1105	-13.4499	-10.7594	-7.41602	-7.30734	-15.5383	-13.3063	-5.33489	-11.2355	-10.263	-10.859	-9.37784		10.1165	11.1105	13.4499	10.7594	7.41602	7.30734	15.5383	13.3063	5.33489	11.2355	10.263	10.859	9.37784
-84.6408	-7.98299	-9.05572	-16.2987	-9.77941	-10.4857	-17.3666	-16.9646	-5.1483	-11.7236	-56.8917	-9.39405	-12.4117		84.6408	7.98299	9.05572	16.2987	9.77941	10.4857	17.3666	16.9646	5.1483	11.7236	56.8917	9.39405	12.4117
-8.04224	-7.61669	-8.44554	-16.7151	-8.04812	-17.8712	-9.1258	-22.8796	-5.08675	-15.5077	-6.83935	-11.8353	-14.7284		8.04224	7.61669	8.44554	16.7151	8.04812	17.8712	9.1258	22.8796	5.08675	15.5077	6.83935	11.8353	14.7284
-10.9121	-7.00583	-19.5541	-7.79586	-30.203	-14.5754	-12.1093	-33.0093	-5.44992	-7.93887	-7.81359	-8.78355	-7.88702		10.9121	7.00583	19.5541	7.79586	30.203	14.5754	12.1093	33.0093	5.44992	7.93887	7.81359	8.78355	7.88702
-8.71579	-6.30891	-13.2067	-14.9939	-8.83997	-7.56321	-5.88349	-18.177	-5.32696	-8.79267	-7.93268	-9.88217	-8.97627		8.71579	6.30891	13.2067	14.9939	8.83997	7.56321	5.88349	18.177	5.32696	8.79267	7.93268	9.88217	8.97627
-6.76297	-29.3046	-10.2164	-17.2468	-19.0875	-8.96772	-8.81224	-14.3911	-6.18029	-12.9421	-9.15163	-11.4691	-32.5347		6.76297	29.3046	10.2164	17.2468	19.0875	8.96772	8.81224	14.3911	6.18029	12.9421	9.15163	11.4691	32.5347
-7.19043	-24.6039	-9.72825	-8.18309	-10.2365	-12.8779	-5.57494	-13.9023	-5.50873	-16.4803	-24.4095	-9.88216	-10.9075		7.19043	24.6039	9.72825	8.18309	10.2365	12.8779	5.57494	13.9023	5.50873	16.4803	24.4095	9.88216	10.9075
-7.25183	-6.83266	-8.20239	-55.7244	-18.1704	-7.20588	-19.9153	-12.979	-5.93478	-7.32449	-33.6866	-7.1966	-9.07087		7.25183	6.83266	8.20239	55.7244	18.1704	7.20588	19.9153	12.979	5.93478	7.32449	33.6866	7.1966	9.07087
-6.70275	-8.23157	-8.93567	-25.3256	-26.2202	-9.77175	-5.87443	-10.5372	-5.56528	-12.8167	-10.1261	-8.53936	-8.582		6.70275	8.23157	8.93567	25.3256	26.2202	9.77175	5.87443	10.5372	5.56528	12.8167	10.1261	8.53936	8.582
-9.14514	-9.93144	-12.5391	-8.04452	-25.1813	-7.94526	-9.96284	-26.2754	-5.38159	-15.1355	-7.07417	-8.53932	-10.2885		9.14514	9.93144	12.5391	8.04452	25.1813	7.94526	9.96284	26.2754	5.38159	15.1355	7.07417	8.53932	10.2885
-6.3394	-8.87624	-11.1963	-23.1756	-7.96771	-9.65497	-7.82366	-20.3544	-5.3181	-7.68901	-6.7063	-7.31861	-8.08585		6.3394	8.87624	11.1963	23.1756	7.96771	9.65497	7.82366	20.3544	5.3181	7.68901	6.7063	7.31861	8.08585
-6.15669	-10.7657	-11.8678	-42.4621	-7.05137	-16.9801	-5.38219	-13.6404	-6.6587	-16.4776	-16.2262	-10.8586	-20.7366		6.15669	10.7657	11.8678	42.4621	7.05137	16.9801	5.38219	13.6404	6.6587	16.4776	16.2262	10.8586	20.7366
-6.1567	-10.8134	-27.8591	-17.0662	-9.37035	-17.469	-8.92124	-11.4991	-6.96226	-13.5468	-6.94714	-11.7131	-11.4465		6.1567	10.8134	27.8591	17.0662	9.37035	17.469	8.92124	11.4991	6.96226	13.5468	6.94714	11.7131	11.4465
-6.09571	-21.0658	-30.1175	-30.4775	-8.87935	-8.43695	-8.42973	-8.26333	-5.00801	-23.4336	-6.82297	-14.5206	-10.9487		6.09571	21.0658	30.1175	30.4775	8.87935	8.43695	8.42973	8.26333	5.00801	23.4336	6.82297	14.5206	10.9487
-6.64563	-24.1076	-26.0892	-21.1305	-11.991	-14.9684	-5.74158	-18.944	-5.2486	-9.88281	-6.8229	-7.31848	-13.363		6.64563	24.1076	26.0892	21.1305	11.991	14.9684	5.74158	18.944	5.2486	9.88281	6.8229	7.31848	13.363
-6.52404	-8.9913	-13.2113	-15.145	-10.0883	-10.6988	-9.22045	-11.3752	-8.66616	-7.19724	-21.7088	-7.07433	-12.99		6.52404	8.9913	13.2113	15.145	10.0883	10.6988	9.22045	11.3752	8.66616	7.19724	21.7088	7.07433	12.99
-15.4357	-7.52333	-10.0987	-11.0043	-21.8585	-17.0471	-6.41273	-21.1991	-6.09797	-13.7886	-7.30071	-10.4923	-7.24151		15.4357	7.52333	10.0987	11.0043	21.8585	17.0471	6.41273	21.1991	6.09797	13.7886	7.30071	10.4923	7.24151
-12.8725	-23.5467	-15.5313	-14.0496	-10.9236	-10.9445	-9.70721	-16.6821	-5.1213	-14.3979	-6.81174	-10.1261	-12.2425		12.8725	23.5467	15.5313	14.0496	10.9236	10.9445	9.70721	16.6821	5.1213	14.3979	6.81174	10.1261	12.2425
-13.2999	-14.0163	-9.55025	-13.3623	-7.32225	-11.2533	-8.30309	-11.8598	-9.3912	-9.39289	-6.93379	-14.3985	-13.6993		13.2999	14.0163	9.55025	13.3623	7.32225	11.2533	8.30309	11.8598	9.3912	9.39289	6.93379	14.3985	13.6993
-6.40314	-6.78876	-13.8228	-11.3472	-10.3565	-8.14541	-5.37315	-16.7424	-5.1182	-18.791	-8.63628	-7.19636	-18.0897		6.40314	6.78876	13.8228	11.3472	10.3565	8.14541	5.37315	16.7424	5.1182	18.791	8.63628	7.19636	18.0897
-49.7995	-7.69032	-9.85555	-18.3037	-14.3589	-12.1145	-7.6892	-18.085	-5.36224	-12.9315	-6.6699	-8.29498	-7.21141		49.7995	7.69032	9.85555	18.3037	14.3589	12.1145	7.6892	18.085	5.36224	12.9315	6.6699	8.29498	7.21141
-19.2218	-8.96694	-9.12326	-8.27874	-10.4789	-31.4053	-6.64803	-17.1561	-5.23997	-7.43831	-7.64278	-8.05083	-30.0298		19.2218	8.96694	9.12326	8.27874	10.4789	31.4053	6.64803	17.1561	5.23997	7.43831	7.64278	8.05083	30.0298
-23.3131	-26.2869	-11.5047	-20.786	-19.6649	-8.33654	-6.64468	-9.70752	-5.48256	-7.31624	-20.7035	-18.5489	-7.06893		23.3131	26.2869	11.5047	20.786	19.6649	8.33654	6.64468	9.70752	5.48256	7.31624	20.7035	18.5489	7.06893
-6.46768	-8.64684	-9.73473	-14.6129	-9.63807	-7.97151	-8.28591	-11.4761	-24.9508	-9.99859	-9.58283	-7.92873	-10.2078		6.46768	8.64684	9.73473	14.6129	9.63807	7.97151	8.28591	11.4761	24.9508	9.99859	9.58283	7.92873	10.2078
-6.46813	-9.06085	-11.9934	-7.0362	-16.5214	-7.9776	-11.3362	-10.1918	-5.66238	-8.28811	-6.65014	-12.3232	-7.1558		6.46813	9.06085	11.9934	7.0362	16.5214	7.9776	11.3362	10.1918	5.66238	8.28811	6.65014	12.3232	7.1558
-41.3193	-16.9068	-16.3269	-20.5459	-9.62025	-15.8517	-7.73408	-21.7858	-9.0109	-17.4432	-27.0304	-10.8583	-9.09356		41.3193	16.9068	16.3269	20.5459	9.62025	15.8517	7.73408	21.7858	9.0109	17.4432	27.0304	10.8583	9.09356
-7.99474	-12.0191	-8.0267	-11.9215	-18.4691	-13.594	-12.8593	-14.3982	-5.82987	-8.04373	-10.5498	-29.9012	-14.5849		7.99474	12.0191	8.0267	11.9215	18.4691	13.594	12.8593	14.3982	5.82987	8.04373	10.5498	29.9012	14.5849
-6.2868	-7.47649	-9.00337	-11.5517	-7.41132	-7.55329	-7.11589	-17.0814	-5.09736	-15.4897	-7.86388	-8.41685	-14.2085		6.2868	7.47649	9.00337	11.5517	7.41132	7.55329	7.11589	17.0814	5.09736	15.4897	7.86388	8.41685	14.2085
-23.5613	-12.4796	-13.8871	-7.0343	-9.72523	-8.71318	-10.5947	-12.0739	-5.21785	-25.132	-12.6231	-11.2244	-9.20339		23.5613	12.4796	13.8871	7.0343	9.72523	8.71318	10.5947	12.0739	5.21785	25.132	12.6231	11.2244	9.20339
-12.392	-10.7641	-11.934	-13.4987	-11.6125	-10.6674	-15.9573	-31.7188	-6.60292	-14.0233	-8.22605	-7.44017	-13.7192		12.392	10.7641	11.934	13.4987	11.6125	10.6674	15.9573	31.7188	6.60292	14.0233	8.22605	7.44017	13.7192
-7.26778	-7.03552	-8.63812	-8.82656	-14.4763	-7.8032	-10.8288	-20.6712	-5.01583	-8.04184	-8.83634	-16.5954	-7.49309		7.26778	7.03552	8.63812	8.82656	14.4763	7.8032	10.8288	20.6712	5.01583	8.04184	8.83634	16.5954	7.49309
-9.77048	-16.1283	-24.6925	-11.9287	-11.485	-35.3345	-8.99489	-15.9032	-5.99195	-7.55355	-6.6347	-11.5904	-7.49297		9.77048	16.1283	24.6925	11.9287	11.485	35.3345	8.99489	15.9032	5.99195	7.55355	6.6347	11.5904	7.49297
-7.39092	-50.547	-13.4631	-10.2785	-7.27292	-9.51748	-7.89414	-8.14871	-5.25928	-27.939	-9.68281	-21.4781	-15.2971		7.39092	50.547	13.4631	10.2785	7.27292	9.51748	7.89414	8.14871	5.25928	27.939	9.68281	21.4781	15.2971
-12.6405	-7.93494	-13.0366	-16.2545	-8.61146	-8.48059	-6.48701	-8.33178	-5.44224	-8.16364	-12.123	-23.4311	-7.97132		12.6405	7.93494	13.0366	16.2545	8.61146	8.48059	6.48701	8.33178	5.44224	8.16364	12.123	23.4311	7.97132
-10.5661	-22.2474	-10.9007	-9.96455	-7.57114	-10.4347	-5.38574	-16.3263	-6.96796	-9.2614	-21.3915	-10.1255	-7.36085		10.5661	22.2474	10.9007	9.96455	7.57114	10.4347	5.38574	16.3263	6.96796	9.2614	21.3915	10.1255	7.36085
-6.29373	-22.847	-22.8636	-8.84744	-13.0597	-8.0553	-6.66616	-13.5754	-6.5405	-10.9699	-12.1098	-9.14886	-7.59713		6.29373	22.847	22.8636	8.84744	13.0597	8.0553	6.66616	13.5754	6.5405	10.9699	12.1098	9.14886	7.59713
-7.57554	-6.73354	-20.2392	-15.7327	-7.25464	-14.7086	-9.59505	-17.4741	-6.23508	-10.2368	-14.6628	-11.3461	-7.83989		7.57554	6.73354	20.2392	15.7327	7.25464	14.7086	9.59505	17.4741	6.23508	10.2368	14.6628	11.3461	7.83989
-6.17177	-9.72295	-11.023	-7.71905	-24.5067	-8.85109	-6.11429	-29.3737	-8.43033	-7.42905	-33.5833	-11.8344	-7.59565		6.17177	9.72295	11.023	7.71905	24.5067	8.85109	6.11429	29.3737	8.43033	7.42905	33.5833	11.8344	7.59565
-6.90453	-7.46401	-15.1124	-7.43635	-15.5329	-10.8053	-19.6613	-11.7906	-8.85722	-7.42814	-10.8716	-10.1253	-8.45002		6.90453	7.46401	15.1124	7.43635	15.5329	10.8053	19.6613	11.7906	8.85722	7.42814	10.8716	10.1253	8.45002
-9.04135	-7.2141	-25.3668	-17.4456	-10.2221	-13.674	-11.6043	-12.7008	-5.13394	-13.5305	-9.89094	-8.53829	-12.5807		9.04135	7.2141	25.3668	17.4456	10.2221	13.674	11.6043	12.7008	5.13394	13.5305	9.89094	8.53829	12.5807
-6.78308	-7.14819	-8.15573	-7.24448	-7.10792	-11.9071	-10.3191	-21.9155	-5.19474	-10.1125	-23.5583	-27.3371	-17.3331		6.78308	7.14819	8.15573	7.24448	7.10792	11.9071	10.3191	21.9155	5.19474	10.1125	23.5583	27.3371	17.3331
-6.35585	-15.075	-9.55961	-10.288	-10.2176	-8.67276	-5.61798	-15.1398	-5.56026	-9.1355	-7.43692	-13.421	-19.1607		6.35585	15.075	9.55961	10.288	10.2176	8.67276	5.61798	15.1398	5.56026	9.1355	7.43692	13.421	19.1607
-61.5319	-7.13898	-11.3301	-14.2467	-15.6447	-14.0441	-5.79824	-23.8664	-6.10943	-7.67044	-7.18796	-12.4443	-21.6014		61.5319	7.13898	11.3301	14.2467	15.6447	14.0441	5.79824	23.8664	6.10943	7.67044	7.18796	12.4443	21.6014
-9.65521	-7.1305	-13.2835	-11.4879	-8.18846	-7.45809	-10.065	-29.8402	-8.55027	-15.1163	-7.78552	-57.9765	-11.9521		9.65521	7.1305	13.2835	11.4879	8.18846	7.45809	10.065	29.8402	8.55027	15.1163	7.78552	57.9765	11.9521
-7.09466	-14.9397	-8.27876	-8.85628	-11.2916	-7.33696	-12.5017	-29.2296	-6.65795	-11.088	-6.91994	-18.3035	-9.14062		7.09466	14.9397	8.27876	8.85628	11.2916	7.33696	12.5017	29.2296	6.65795	11.088	6.91994	18.3035	9.14062
-20.0368	-7.00303	-9.92732	-8.73272	-16.5548	-14.481	-4.99427	-13.7261	-7.2068	-7.66929	-10.2157	-10.0026	-15.7266		20.0368	7.00303	9.92732	8.73272	16.5548	14.481	4.99427	13.7261	7.2068	7.66929	10.2157	10.0026	15.7266
-21.0144	-6.38335	-10.2939	-12.0806	-12.3382	-7.64524	-5.9092	-8.17115	-5.13088	-7.91211	-19.9781	-15.0074	-9.1336		21.0144	6.38335	10.2939	12.0806	12.3382	7.64524	5.9092	8.17115	5.13088	7.91211	19.9781	15.0074	9.1336
-6.24421	-6.86297	-12.614	-31.7674	-7.14959	-7.15785	-14.9414	-12.015	-5.55638	-11.208	-12.7493	-7.43906	-20.9742		6.24421	6.86297	12.614	31.7674	7.14959	7.15785	14.9414	12.015	5.55638	11.208	12.7493	7.43906	20.9742
-6.12396	-12.105	-16.0932	-30.7691	-12.3871	-7.21942	-8.46997	-8.5358	-5.31215	-7.30112	-9.57214	-7.31698	-11.555		6.12396	12.105	16.0932	30.7691	12.3871	7.21942	8.46997	8.5358	5.31215	7.30112	9.57214	7.31698	11.555
-7.04172	-6.18072	-12.5536	-11.4764	-13.6071	-7.15954	-4.99062	-19.6408	-7.92738	-8.27707	-7.25148	-10.4908	-7.15993		7.04172	6.18072	12.5536	11.4764	13.6071	7.15954	4.99062	19.6408	7.92738	8.27707	7.25148	10.4908	7.15993
-15.4046	-9.70591	-13.6523	-11.4674	-15.5579	-8.56364	-5.1737	-15.0601	-7.98382	-19.019	-22.0169	-11.9556	-11.7941		15.4046	9.70591	13.6523	11.4674	15.5579	8.56364	5.1737	15.0601	7.98382	19.019	22.0169	11.9556	11.7941
-8.45079	-8.5193	-8.22031	-12.0724	-12.3213	-7.10217	-19.5138	-16.2183	-10.729	-17.4307	-8.46514	-15.4956	-14.5991		8.45079	8.5193	8.22031	12.0724	12.3213	7.10217	19.5138	16.2183	10.729	17.4307	8.46514	15.4956	14.5991
-6.13297	-27.6728	-28.9139	-7.39085	-8.35049	-10.7045	-11.0903	-12.3674	-6.45538	-9.25123	-17.0096	-13.5425	-15.451		6.13297	27.6728	28.9139	7.39085	8.35049	10.7045	11.0903	12.3674	6.45538	9.25123	17.0096	13.5425	15.451
-17.2429	-16.986	-20.6761	-7.57228	-14.6266	-8.20239	-21.2193	-14.6848	-5.47808	-10.4717	-6.87257	-8.17135	-7.63821		17.2429	16.986	20.6761	7.57228	14.6266	8.20239	21.2193	14.6848	5.47808	10.4717	6.87257	8.17135	7.63821
-8.14907	-8.92898	-12.4368	-19.4062	-8.50302	-13.2089	-18.9569	-9.2503	-10.2925	-11.5676	-25.7905	-12.3216	-7.99418		8.14907	8.92898	12.4368	19.4062	8.50302	13.2089	18.9569	9.2503	10.2925	11.5676	25.7905	12.3216	7.99418
-8.51679	-18.6124	-25.9256	-8.45472	-11.3677	-25.5403	-8.45413	-17.9776	-6.69061	-13.2762	-28.2214	-7.68291	-15.0497		8.51679	18.6124	25.9256	8.45472	11.3677	25.5403	8.45413	17.9776	6.69061	13.2762	28.2214	7.68291	15.0497
-8.02873	-6.64428	-8.77485	-23.6519	-8.12983	-8.6357	-13.7576	-22.3618	-5.22022	-11.3229	-11.1136	-12.8099	-8.7007		8.02873	6.64428	8.77485	23.6519	8.12983	8.6357	13.7576	22.3618	5.22022	11.3229	11.1136	12.8099	8.7007
-6.13673	-26.6583	-12.01	-8.94157	-18.2498	-7.35402	-7.52772	-13.3274	-14.0649	-13.2757	-6.95542	-15.2512	-16.3776		6.13673	26.6583	12.01	8.94157	18.2498	7.35402	7.52772	13.3274	14.0649	13.2757	6.95542	15.2512	16.3776
-14.8652	-11.1903	-10.4844	-16.6283	-12.4476	-8.08721	-5.51336	-13.9371	-5.27533	-8.39261	-7.07739	-25.383	-11.7307		14.8652	11.1903	10.4844	16.6283	12.4476	8.08721	5.51336	13.9371	5.27533	8.39261	7.07739	25.383	11.7307
-6.01529	-6.00224	-13.354	-21.6219	-10.4733	-13.2754	-5.44845	-35.6039	-5.94658	-21.6982	-9.14551	-8.04902	-7.07213		6.01529	6.00224	13.354	21.6219	10.4733	13.2754	5.44845	35.6039	5.94658	21.6982	9.14551	8.04902	7.07213
-9.00868	-7.21447	-8.65467	-7.57966	-13.3973	-11.872	-6.72425	-8.2503	-11.6834	-9.49032	-28.3098	-16.2277	-7.17589		9.00868	7.21447	8.65467	7.57966	13.3973	11.872	6.72425	8.2503	11.6834	9.49032	28.3098	16.2277	7.17589
-7.91318	-6.11061	-13.1716	-8.67361	-9.29014	-9.67506	-11.5366	-17.6425	-5.09063	-10.9537	-22.9378	-30.0216	-9.92937		7.91318	6.11061	13.1716	8.67361	9.29014	9.67506	11.5366	17.6425	5.09063	10.9537	22.9378	30.0216	9.92937
-8.40156	-6.72092	-14.454	-10.1319	-7.14942	-7.05061	-23.9872	-12.4441	-5.74312	-14.6151	-9.74618	-22.2091	-7.95057		8.40156	6.72092	14.454	10.1319	7.14942	7.05061	23.9872	12.4441	5.74312	14.6151	9.74618	22.2091	7.95057
-6.63299	-16.5302	-16.163	-35.4564	-10.3696	-21.7044	-7.32324	-11.2836	-5.66935	-21.6947	-21.4594	-8.65928	-20.6441		6.63299	16.5302	16.163	35.4564	10.3696	21.7044	7.32324	11.2836	5.66935	21.6947	21.4594	8.65928	20.6441
-11.3341	-6.2135	-17.4457	-22.3302	-16.3339	-16.7634	-5.06479	-18.8439	-6.15687	-7.53422	-8.27239	-12.5655	-8.5557		11.3341	6.2135	17.4457	22.3302	16.3339	16.7634	5.06479	18.8439	6.15687	7.53422	8.27239	12.5655	8.5557
-6.02405	-18.1131	-19.2768	-10.7236	-26.6429	-11.9423	-12.2669	-21.9559	-6.27869	-7.41186	-6.92241	-20.5001	-10.5086		6.02405	18.1131	19.2768	10.7236	26.6429	11.9423	12.2669	21.9559	6.27869	7.41186	6.92241	20.5001	10.5086
-21.5277	-11.0831	-11.7087	-13.4026	-17.9088	-13.2863	-15.0127	-26.4112	-6.03069	-12.4165	-6.66741	-7.07227	-9.88295		21.5277	11.0831	11.7087	13.4026	17.9088	13.2863	15.0127	26.4112	6.03069	12.4165	6.66741	7.07227	9.88295
-9.32154	-6.20019	-17.3853	-8.76092	-19.172	-7.73235	-7.31804	-11.2009	-5.41415	-11.5616	-12.1601	-7.56055	-8.05073		9.32154	6.20019	17.3853	8.76092	19.172	7.73235	7.31804	11.2009	5.41415	11.5616	12.1601	7.56055	8.05073
-8.89585	-22.541	-8.90209	-14.7409	-23.1953	-8.89336	-7.85762	-11.5667	-18.5826	-8.74972	-7.51649	-8.9033	-8.65276		8.89585	22.541	8.90209	14.7409	23.1953	8.89336	7.85762	11.5667	18.5826	8.74972	7.51649	8.9033	8.65276
-6.51651	-6.05793	-9.87896	-28.4073	-27.7721	-11.458	-5.41618	-35.1233	-6.24257	-10.0909	-9.95668	-10.8564	-7.06575		6.51651	6.05793	9.87896	28.4073	27.7721	11.458	5.41618	35.1233	6.24257	10.0909	9.95668	10.8564	7.06575
-12.3786	-11.6688	-18.2411	-7.16242	-9.93539	-17.9899	-8.34514	-16.9342	-5.50035	-9.60177	-6.90193	-12.8095	-14.9942		12.3786	11.6688	18.2411	7.16242	9.93539	17.9899	8.34514	16.9342	5.50035	9.60177	6.90193	12.8095	14.9942
-23.9779	-7.56297	-10.6118	-7.62481	-8.15584	-8.22473	-6.38388	-13.6937	-28.5977	-10.5768	-7.87826	-8.4149	-15.9614		23.9779	7.56297	10.6118	7.62481	8.15584	8.22473	6.38388	13.6937	28.5977	10.5768	7.87826	8.4149	15.9614
-7.3789	-33.9034	-18.1234	-17.2786	-8.50094	-21.0427	-7.41914	-24.8003	-5.63342	-15.9475	-7.878	-7.43833	-22.6552		7.3789	33.9034	18.1234	17.2786	8.50094	21.0427	7.41914	24.8003	5.63342	15.9475	7.878	7.43833	22.6552
-10.2478	-7.77495	-9.57911	-7.81013	-10.4777	-17.9937	-9.31061	-20.8827	-5.08394	-11.675	-8.73242	-14.8846	-8.85912		10.2478	7.77495	9.57911	7.81013	10.4777	17.9937	9.31061	20.8827	5.08394	11.675	8.73242	14.8846	8.85912
-12.14	-7.64854	-8.60321	-10.5512	-8.42958	-14.3338	-7.7236	-30.8853	-7.88603	-9.59921	-7.38954	-16.2274	-8.23267		12.14	7.64854	8.60321	10.5512	8.42958	14.3338	7.7236	30.8853	7.88603	9.59921	7.38954	16.2274	8.23267
-18.489	-19.5468	-14.5847	-16.83	-9.57001	-8.41377	-6.80762	-13.7293	-5.49304	-14.2371	-8.60547	-9.63546	-11.6291		18.489	19.5468	14.5847	16.83	9.57001	8.41377	6.80762	13.7293	5.49304	14.2371	8.60547	9.63546	11.6291
-7.38432	-8.01007	-11.0456	-13.2621	-7.91834	-7.13228	-11.0165	-12.567	-15.8038	-9.59737	-12.388	-8.90302	-8.6901		7.38432	8.01007	11.0456	13.2621	7.91834	7.13228	11.0165	12.567	15.8038	9.59737	12.388	8.90302	8.6901
-9.94904	-14.9565	-8.91034	-8.86639	-18.1393	-11.5273	-10.6476	-14.8791	-9.87822	-13.5007	-13.2312	-37.9557	-11.1278		9.94904	14.9565	8.91034	8.86639	18.1393	11.5273	10.6476	14.8791	9.87822	13.5007	13.2312	37.9557	11.1278
-8.11989	-8.97375	-10.3759	-24.0377	-11.2954	-8.41688	-6.06598	-17.3196	-5.04565	-13.1305	-7.12244	-9.14713	-10.3834		8.11989	8.97375	10.3759	24.0377	11.2954	8.41688	6.06598	17.3196	5.04565	13.1305	7.12244	9.14713	10.3834
-9.58925	-7.62606	-12.5737	-18.2345	-17.2133	-13.8529	-16.8019	-20.3634	-6.32486	-9.34592	-23.1119	-16.5933	-7.08321		9.58925	7.62606	12.5737	18.2345	17.2133	13.8529	16.8019	20.3634	6.32486	9.34592	23.1119	16.5933	7.08321
-6.44313	-14.698	-15.3816	-7.20591	-15.6107	-13.2455	-5.62836	-13.5274	-6.1984	-30.9523	-12.8577	-17.936	-10.0126		6.44313	14.698	15.3816	7.20591	15.6107	13.2455	5.62836	13.5274	6.1984	30.9523	12.8577	17.936	10.0126
-13.598	-15.1251	-15.7501	-13.9728	-8.45639	-19.1075	-11.5483	-16.0253	-5.46583	-14.8387	-13.8324	-8.17027	-8.18124		13.598	15.1251	15.7501	13.9728	8.45639	19.1075	11.5483	16.0253	5.46583	14.8387	13.8324	8.17027	8.18124
-9.64723	-14.9404	-21.2437	-7.01447	-13.7731	-8.67172	-14.5979	-35.6727	-5.08642	-7.3919	-7.23675	-28.556	-7.69281		9.64723	14.9404	21.2437	7.01447	13.7731	8.67172	14.5979	35.6727	5.08642	7.3919	7.23675	28.556	7.69281
-6.24506	-15.7324	-9.6474	-15.5587	-11.8755	-7.21297	-18.6248	-17.3525	-6.5465	-9.22269	-6.86904	-8.0481	-7.44857		6.24506	15.7324	9.6474	15.5587	11.8755	7.21297	18.6248	17.3525	6.5465	9.22269	6.86904	8.0481	7.44857
-6.16569	-7.36648	-12.5773	-9.75594	-8.51159	-7.09462	-24.6038	-22.4764	-5.99704	-9.10058	-6.62434	-17.4475	-7.81425		6.16569	7.36648	12.5773	9.75594	8.51159	7.09462	24.6038	22.4764	5.99704	9.10058	6.62434	17.4475	7.81425
-13.8536	-6.55764	-15.141	-32.9921	-7.65533	-7.03615	-14.2873	-9.23171	-5.26412	-10.3213	-16.7507	-29.4103	-10.2511		13.8536	6.55764	15.141	32.9921	7.65533	7.03615	14.2873	9.23171	5.26412	10.3213	16.7507	29.4103	10.2511
-15.1313	-10.4631	-15.6298	-12.6622	-7.95605	-8.38056	-8.24254	-29.798	-14.6388	-12.2726	-6.74058	-9.14662	-7.56526		15.1313	10.4631	15.6298	12.6622	7.95605	8.38056	8.24254	29.798	14.6388	12.2726	6.74058	9.14662	7.56526
-6.1806	-13.7583	-13.2503	-7.28604	-8.86574	-14.79	-5.24982	-8.67838	-10.2408	-10.3194	-14.175	-12.8087	-11.2208		6.1806	13.7583	13.2503	7.28604	8.86574	14.79	5.24982	8.67838	10.2408	10.3194	14.175	12.8087	11.2208
-7.20242	-8.11068	-8.18446	-9.28353	-8.74274	-27.549	-30.8166	-10.9954	-5.47987	-13.6144	-11.977	-13.9073	-7.8026		7.20242	8.11068	8.18446	9.28353	8.74274	27.549	30.8166	10.9954	5.47987	13.6144	11.977	13.9073	7.8026
-9.45861	-6.70677	-12.397	-12.2738	-8.24199	-8.62959	-9.51504	-18.9279	-7.85822	-13.2478	-7.09036	-18.3019	-8.2526		9.45861	6.70677	12.397	12.2738	8.24199	8.62959	9.51504	18.9279	7.85822	13.2478	7.09036	18.3019	8.2526
-6.93861	-11.0978	-18.867	-8.36056	-31.125	-15.2226	-12.4433	-11.4163	-16.1558	-7.87657	-8.67308	-12.1983	-9.83567		6.93861	11.0978	18.867	8.36056	31.125	15.2226	12.4433	11.4163	16.1558	7.87657	8.67308	12.1983	9.83567
-26.074	-6.27552	-8.73605	-22.6156	-7.86127	-17.6032	-14.0292	-8.66933	-6.08146	-15.2007	-8.06183	-7.07136	-9.83346		26.074	6.27552	8.73605	22.6156	7.86127	17.6032	14.0292	8.66933	6.08146	15.2007	8.06183	7.07136	9.83346
-6.4772	-10.8889	-10.2619	-7.10788	-9.85959	-15.5993	-7.98089	-15.9324	-5.10123	-12.1486	-8.30303	-7.31539	-10.9312		6.4772	10.8889	10.2619	7.10788	9.85959	15.5993	7.98089	15.9324	5.10123	12.1486	8.30303	7.31539	10.9312
-25.4082	-18.0898	-14.9617	-10.1594	-10.2613	-17.3086	-7.00233	-35.4013	-16.0863	-17.1528	-14.1592	-12.1982	-9.22051		25.4082	18.0898	14.9617	10.1594	10.2613	17.3086	7.00233	35.4013	16.0863	17.1528	14.1592	12.1982	9.22051
-6.59442	-8.38331	-18.6867	-8.62975	-12.6862	-8.39854	-16.7043	-27.2692	-7.47986	-11.0488	-25.0216	-11.0996	-13.4905		6.59442	8.38331	18.6867	8.62975	12.6862	8.39854	16.7043	27.2692	7.47986	11.0488	25.0216	11.0996	13.4905
-16.5285	-12.0311	-13.9275	-17.9164	-25.9193	-16.4584	-7.36331	-11.637	-6.31902	-8.72886	-7.19911	-9.63466	-13.4893		16.5285	12.0311	13.9275	17.9164	25.9193	16.4584	7.36331	11.637	6.31902	8.72886	7.19911	9.63466	13.4893
-6.1503	-10.0754	-8.19138	-8.07607	-12.914	-7.61724	-5.7093	-14.3807	-5.28124	-7.26399	-6.82717	-10.6112	-7.24118		6.1503	10.0754	8.19138	8.07607	12.914	7.61724	5.7093	14.3807	5.28124	7.26399	6.82717	10.6112	7.24118
-6.03861	-17.392	-31.8746	-25.6952	-13.5569	-11.7071	-18.3376	-9.00774	-5.27562	-8.8509	-13.2806	-16.7147	-7.47141		6.03861	17.392	31.8746	25.6952	13.5569	11.7071	18.3376	9.00774	5.27562	8.8509	13.2806	16.7147	7.47141
-7.31357	-6.03904	-34.9264	-7.25626	-12.2691	-17.6923	-7.89943	-9.06706	-5.82216	-13.3668	-10.2246	-11.2215	-9.66858		7.31357	6.03904	34.9264	7.25626	12.2691	17.6923	7.89943	9.06706	5.82216	13.3668	10.2246	11.2215	9.66858
-8.20454	-7.89434	-26.5649	-8.16652	-18.9812	-13.3592	-9.8505	-16.5122	-7.16472	-10.1918	-7.6551	-19.156	-7.94043		8.20454	7.89434	26.5649	8.16652	18.9812	13.3592	9.8505	16.5122	7.16472	10.1918	7.6551	19.156	7.94043
-16.0126	-6.78671	-8.80396	-13.0424	-7.44458	-8.96509	-15.8928	-15.8999	-7.86952	-7.1387	-19.4837	-14.3953	-7.32996		16.0126	6.78671	8.80396	13.0424	7.44458	8.96509	15.8928	15.8999	7.86952	7.1387	19.4837	14.3953	7.32996
-9.45629	-14.2292	-16.6779	-10.108	-9.31537	-25.8731	-9.35836	-19.3787	-5.41273	-8.23727	-22.1678	-11.0993	-7.08117		9.45629	14.2292	16.6779	10.108	9.31537	25.8731	9.35836	19.3787	5.41273	8.23727	22.1678	11.0993	7.08117
-6.73273	-6.46469	-15.2753	-7.48252	-8.55847	-10.1873	-14.2951	-21.6946	-5.83918	-7.74864	-13.8547	-28.4333	-8.65519		6.73273	6.46469	15.2753	7.48252	8.55847	10.1873	14.2951	21.6946	5.83918	7.74864	13.8547	28.4333	8.65519
-9.38294	-13.5436	-23.6982	-8.26956	-10.871	-9.27257	-9.16589	-15.4644	-5.90003	-13.7297	-16.4165	-7.31503	-11.9499		9.38294	13.5436	23.6982	8.26956	10.871	9.27257	9.16589	15.4644	5.90003	13.7297	16.4165	7.31503	11.9499
-42.1631	-12.5038	-14.6651	-14.6118	-7.2055	-7.93706	-5.38086	-16.7454	-6.63221	-7.50335	-11.166	-13.9068	-9.49107		42.1631	12.5038	14.6651	14.6118	7.2055	7.93706	5.38086	16.7454	6.63221	7.50335	11.166	13.9068	9.49107
-16.6067	-7.55653	-21.0739	-7.70144	-7.02232	-7.9984	-11.2378	-20.2777	-5.47241	-8.35774	-7.25428	-8.41358	-8.26858		16.6067	7.55653	21.0739	7.70144	7.02232	7.9984	11.2378	20.2777	5.47241	8.35774	7.25428	8.41358	8.26858
-8.42422	-6.56341	-14.971	-19.8244	-7.06892	-7.32706	-9.95454	-10.4316	-5.95972	-12.8743	-13.3568	-12.1977	-7.90223		8.42422	6.56341	14.971	19.8244	7.06892	7.32706	9.95454	10.4316	5.95972	12.8743	13.3568	12.1977	7.90223
-12.7289	-10.2847	-10.2104	-12.7387	-15.4294	-14.3478	-12.5171	-15.7977	-6.87496	-8.84566	-8.70752	-7.31493	-14.3715		12.7289	10.2847	10.2104	12.7387	15.4294	14.3478	12.5171	15.7977	6.87496	8.84566	8.70752	7.31493	14.3715
-10.9368	-10.9417	-18.6335	-18.1071	-14.4387	-7.08487	-5.74115	-24.9489	-5.53133	-8.2353	-8.45668	-7.43698	-18.398		10.9368	10.9417	18.6335	18.1071	14.4387	7.08487	5.74115	24.9489	5.53133	8.2353	8.45668	7.43698	18.398
-11.5167	-6.11008	-21.7464	-7.72076	-8.07864	-8.18452	-5.3072	-18.3517	-5.71437	-7.86907	-9.18159	-7.1928	-13.1377		11.5167	6.11008	21.7464	7.72076	8.07864	8.18452	5.3072	18.3517	5.71437	7.86907	9.18159	7.1928	13.1377
-9.58138	-10.2588	-25.2254	-7.41434	-7.21795	-7.09002	-7.93056	-17.5577	-5.0427	-11.5309	-26.501	-14.639	-7.87092		9.58138	10.2588	25.2254	7.41434	7.21795	7.09002	7.93056	17.5577	5.0427	11.5309	26.501	14.639	7.87092
-10.109	-15.7477	-15.522	-7.71856	-31.506	-7.39742	-19.4659	-13.2222	-5.45891	-7.01424	-18.0699	-7.55889	-7.50408		10.109	15.7477	15.522	7.71856	31.506	7.39742	19.4659	13.2222	5.45891	7.01424	18.0699	7.55889	7.50408
-12.2355	-7.99577	-9.23551	-12.9494	-9.15882	-12.2844	-18.671	-10.3528	-5.69948	-7.62417	-6.83755	-12.1975	-16.2929		12.2355	7.99577	9.23551	12.9494	9.15882	12.2844	18.671	10.3528	5.69948	7.62417	6.83755	12.1975	16.2929
-7.26117	-7.38511	-15.4001	-8.05899	-14.7548	-13.3247	-5.05988	-35.0655	-5.57159	-7.13517	-7.56362	-7.925	-7.50209		7.26117	7.38511	15.4001	8.05899	14.7548	13.3247	5.05988	35.0655	5.57159	7.13517	7.56362	7.925	7.50209
-14.4215	-7.07809	-8.38134	-12.3148	-7.35427	-15.7067	-5.73121	-8.20764	-6.42374	-8.23354	-7.06135	-8.047	-7.00123		14.4215	7.07809	8.38134	12.3148	7.35427	15.7067	5.73121	8.20764	6.42374	8.23354	7.06135	8.047	7.00123
-6.9608	-6.52832	-23.5798	-12.1914	-7.21992	-16.0785	-9.45284	-21.8781	-8.97476	-15.5571	-19.6247	-7.55866	-7.48934		6.9608	6.52832	23.5798	12.1914	7.21992	16.0785	9.45284	21.8781	8.97476	15.5571	19.6247	7.55866	7.48934
-6.77236	-26.1075	-14.6089	-8.38348	-12.7668	-15.2902	-13.1758	-8.26	-29.0545	-11.2844	-11.567	-9.26764	-19.6788		6.77236	26.1075	14.6089	8.38348	12.7668	15.2902	13.1758	8.26	29.0545	11.2844	11.567	9.26764	19.6788
-6.46396	-9.07627	-9.78733	-10.2133	-8.43141	-10.0428	-15.0062	-9.05309	-12.2657	-14.5801	-12.7843	-9.2675	-13.6942		6.46396	9.07627	9.78733	10.2133	8.43141	10.0428	15.0062	9.05309	12.2657	14.5801	12.7843	9.2675	13.6942
-7.62843	-13.1614	-8.13949	-28.5557	-12.8699	-7.41868	-8.16775	-13.7477	-8.05063	-9.45284	-34.7526	-24.4042	-12.9615		7.62843	13.1614	8.13949	28.5557	12.8699	7.41868	8.16775	13.7477	8.05063	9.45284	34.7526	24.4042	12.9615
-6.58305	-7.60311	-14.2448	-45.5181	-13.4142	-14.8064	-5.84674	-8.9841	-14.9982	-8.59832	-10.3335	-15.3709	-11.1131		6.58305	7.60311	14.2448	45.5181	13.4142	14.8064	5.84674	8.9841	14.9982	8.59832	10.3335	15.3709	11.1131
-8.46425	-10.0233	-9.48414	-36.2358	-17.6168	-7.43027	-7.4915	-20.4557	-5.7063	-7.86521	-12.5287	-7.43627	-19.7758		8.46425	10.0233	9.48414	36.2358	17.6168	7.43027	7.4915	20.4557	5.7063	7.86521	12.5287	7.43627	19.7758
-7.2669	-15.679	-8.2643	-7.91402	-9.68171	-15.2465	-9.07829	-10.6883	-14.5271	-8.96282	-8.13378	-7.80241	-7.69012		7.2669	15.679	8.2643	7.91402	9.68171	15.2465	9.07829	10.6883	14.5271	8.96282	8.13378	7.80241	7.69012
-21.4914	-6.15667	-8.14226	-8.39495	-7.29414	-18.1794	-4.98178	-13.8005	-5.49193	-10.6718	-23.0229	-12.319	-10.7271		21.4914	6.15667	8.14226	8.39495	7.29414	18.1794	4.98178	13.8005	5.49193	10.6718	23.0229	12.319	10.7271
-9.69657	-8.04291	-20.5329	-15.2266	-7.22593	-15.129	-14.93	-25.8849	-16.5892	-8.59446	-7.14814	-14.272	-7.53046		9.69657	8.04291	20.5329	15.2266	7.22593	15.129	14.93	25.8849	16.5892	8.59446	7.14814	14.272	7.53046
-15.607	-7.73582	-22.9752	-7.52776	-31.0271	-11.4069	-9.61927	-17.7052	-5.65702	-7.49566	-14.8365	-9.87748	-13.7537		15.607	7.73582	22.9752	7.52776	31.0271	11.4069	9.61927	17.7052	5.65702	7.49566	14.8365	9.87748	13.7537
-14.6879	-9.31328	-22.5481	-14.6039	-10.3877	-9.88179	-5.71096	-10.3174	-5.51928	-7.12944	-6.77595	-16.5913	-13.1325		14.6879	9.31328	22.5481	14.6039	10.3877	9.88179	5.71096	10.3174	5.51928	7.12944	6.77595	16.5913	13.1325
-11.3252	-11.2618	-19.2526	-11.9497	-10.4948	-7.37942	-7.96137	-11.1718	-5.21394	-9.5707	-7.99198	-7.80225	-11.7691		11.3252	11.2618	19.2526	11.9497	10.4948	7.37942	7.96137	11.1718	5.21394	9.5707	7.99198	7.80225	11.7691
-6.05082	-6.62297	-13.6988	-8.02656	-13.7894	-16.5367	-6.19023	-24.9011	-5.0213	-7.98352	-6.64451	-7.43598	-7.0073		6.05082	6.62297	13.6988	8.02656	13.7894	16.5367	6.19023	24.9011	5.0213	7.98352	6.64451	7.43598	7.0073
-11.7007	-7.407	-15.164	-17.6453	-10.5301	-8.23601	-15.0398	-8.72357	-5.44433	-26.2938	-12.6227	-13.7835	-15.7717		11.7007	7.407	15.164	17.6453	10.5301	8.23601	15.0398	8.72357	5.44433	26.2938	12.6227	13.7835	15.7717
-11.4981	-21.2892	-40.982	-15.2028	-8.05984	-8.60226	-17.9082	-13.1146	-5.07771	-10.1802	-8.83602	-7.31375	-7.22028		11.4981	21.2892	40.982	15.2028	8.05984	8.60226	17.9082	13.1146	5.07771	10.1802	8.83602	7.31375	7.22028
-37.1251	-18.5312	-12.967	-47.1748	-16.48	-10.6176	-16.7468	-10.672	-5.62674	-12.3765	-14.3275	-9.75515	-18.199		37.1251	18.5312	12.967	47.1748	16.48	10.6176	16.7468	10.672	5.62674	12.3765	14.3275	9.75515	18.199
-6.28678	-27.3629	-13.3333	-12.8684	-7.75137	-18.2485	-11.0089	-17.8087	-5.3823	-16.893	-21.5293	-9.14478	-13.0701		6.28678	27.3629	13.3333	12.8684	7.75137	18.2485	11.0089	17.8087	5.3823	16.893	21.5293	9.14478	13.0701
-10.1008	-6.88307	-8.7562	-11.8765	-7.72972	-7.32371	-9.47919	-12.4956	-6.05354	-7.73766	-6.75427	-9.51096	-8.79662		10.1008	6.88307	8.7562	11.8765	7.72972	7.32371	9.47919	12.4956	6.05354	7.73766	6.75427	9.51096	8.79662
-6.67068	-10.9081	-20.9634	-18.2797	-21.606	-8.05903	-5.08267	-21.4671	-5.68707	-11.2754	-9.67055	-15.7365	-9.76896		6.67068	10.9081	20.9634	18.2797	21.606	8.05903	5.08267	21.4671	5.68707	11.2754	9.67055	15.7365	9.76896
-16.5236	-12.8609	-16.9352	-19.7388	-14.4516	-13.5523	-8.18461	-16.2742	-5.0741	-12.9844	-7.34783	-14.0274	-8.7856		16.5236	12.8609	16.9352	19.7388	14.4516	13.5523	8.18461	16.2742	5.0741	12.9844	7.34783	14.0274	8.7856
-9.39391	-17.4299	-10.2217	-39.5127	-8.59174	-12.0292	-24.2255	-30.7394	-5.19327	-12.0076	-8.44617	-7.43564	-10.5806		9.39391	17.4299	10.2217	39.5127	8.59174	12.0292	24.2255	30.7394	5.19327	12.0076	8.44617	7.43564	10.5806
-8.38004	-6.25423	-17.607	-14.3029	-10.4798	-7.20765	-6.21401	-27.8663	-5.31275	-11.519	-7.95543	-20.7413	-20.2117		8.38004	6.25423	17.607	14.3029	10.4798	7.20765	6.21401	27.8663	5.31275	11.519	7.95543	20.7413	20.2117
-30.7999	-15.6395	-16.0201	-7.40076	-7.85486	-10.8714	-10.3643	-14.8042	-6.47216	-10.5417	-8.92829	-25.0136	-8.35116		30.7999	15.6395	16.0201	7.40076	7.85486	10.8714	10.3643	14.8042	6.47216	10.5417	8.92829	25.0136	8.35116
-7.70067	-7.92445	-11.0771	-7.87629	-29.0322	-14.1705	-17.8692	-8.51687	-5.36446	-9.80912	-12.4676	-8.53411	-10.4051		7.70067	7.92445	11.0771	7.87629	29.0322	14.1705	17.8692	8.51687	5.36446	9.80912	12.4676	8.53411	10.4051
-11.9148	-7.23339	-9.49039	-52.5419	-7.17875	-19.2373	-5.11255	-14.0659	-5.36409	-21.5275	-7.0962	-8.90032	-8.20469		11.9148	7.23339	9.49039	52.5419	7.17875	19.2373	5.11255	14.0659	5.36409	21.5275	7.0962	8.90032	8.20469
-8.88071	-7.47141	-13.7639	-7.27146	-10.8926	-12.2815	-13.7784	-8.2035	-12.4328	-11.6388	-29.0671	-8.0458	-15.3953		8.88071	7.47141	13.7639	7.27146	10.8926	12.2815	13.7784	8.2035	12.4328	11.6388	29.0671	8.0458	15.3953
-11.3228	-6.41856	-15.5344	-7.68011	-17.3316	-15.4554	-5.41503	-21.5643	-5.34703	-9.07518	-6.95878	-8.28993	-7.70165		11.3228	6.41856	15.5344	7.68011	17.3316	15.4554	5.41503	21.5643	5.34703	9.07518	6.95878	8.28993	7.70165
-10.1779	-7.21085	-11.3843	-16.2103	-13.8388	-18.51	-7.55049	-21.8057	-5.11681	-8.09799	-9.51977	-7.31329	-11.0763		10.1779	7.21085	11.3843	16.2103	13.8388	18.51	7.55049	21.8057	5.11681	8.09799	9.51977	7.31329	11.0763
-32.9404	-16.6696	-9.00399	-27.9248	-14.4262	-7.34068	-10.0495	-8.61608	-5.22717	-10.2925	-15.0127	-13.1726	-12.7585		32.9404	16.6696	9.00399	27.9248	14.4262	7.34068	10.0495	8.61608	5.22717	10.2925	15.0127	13.1726	12.7585
-8.89541	-11.7193	-8.39366	-37.566	-12.0988	-7.58514	-7.36378	-9.0389	-6.00071	-14.564	-12.5707	-9.63257	-8.72261		8.89541	11.7193	8.39366	37.566	12.0988	7.58514	7.36378	9.0389	6.00071	14.564	12.5707	9.63257	8.72261
-17.5049	-6.46457	-9.37046	-35.1062	-7.20224	-8.3799	-10.7758	-26.6102	-5.07244	-10.9013	-6.95507	-7.4353	-8.22828		17.5049	6.46457	9.37046	35.1062	7.20224	8.3799	10.7758	26.6102	5.07244	10.9013	6.95507	7.4353	8.22828
-10.4262	-6.28139	-9.12635	-14.7695	-12.9319	-7.04116	-7.41594	-15.8066	-5.49945	-24.0849	-24.0397	-12.3181	-10.403		10.4262	6.28139	9.12635	14.7695	12.9319	7.04116	7.41594	15.8066	5.49945	24.0849	24.0397	12.3181	10.403
-6.77013	-15.2383	-17.1221	-26.4872	-9.26388	-8.32465	-15.8373	-10.74	-5.31427	-8.33777	-10.232	-19.5202	-7.47168		6.77013	15.2383	17.1221	26.4872	9.26388	8.32465	15.8373	10.74	5.31427	8.33777	10.232	19.5202	7.47168
-31.7472	-28.4736	-12.79	-10.9198	-10.7916	-8.57007	-5.51961	-10.6769	-5.84864	-15.5398	-8.76696	-7.55733	-7.21443		31.7472	28.4736	12.79	10.9198	10.7916	8.57007	5.51961	10.6769	5.84864	15.5398	8.76696	7.55733	7.21443
-6.43763	-7.17125	-12.7292	-45.5854	-13.0992	-10.0962	-12.4774	-23.0662	-13.0334	-22.0091	-10.9623	-9.02215	-9.40863		6.43763	7.17125	12.7292	45.5854	13.0992	10.0962	12.4774	23.0662	13.0334	22.0091	10.9623	9.02215	9.40863
-7.59834	-27.7992	-13.8889	-19.7649	-7.59727	-7.22762	-31.0316	-22.8199	-6.07297	-11.3887	-7.54411	-10.8531	-10.7439		7.59834	27.7992	13.8889	19.7649	7.59727	7.22762	31.0316	22.8199	6.07297	11.3887	7.54411	10.8531	10.7439
-6.26443	-11.5634	-8.51783	-17.8065	-7.35066	-11.867	-9.48454	-10.2436	-8.81362	-8.45606	-6.66634	-7.31304	-8.77948		6.26443	11.5634	8.51783	17.8065	7.35066	11.867	9.48454	10.2436	8.81362	8.45606	6.66634	7.31304	8.77948
-7.00069	-16.1321	-17.1852	-16.4589	-7.96082	-7.16982	-5.08757	-9.93447	-8.61387	-16.0241	-13.3721	-17.5669	-15.9467		7.00069	16.1321	17.1852	16.4589	7.96082	7.16982	5.08757	9.93447	8.61387	16.0241	13.3721	17.5669	15.9467
-7.65226	-19.2375	-9.13151	-7.40569	-14.7896	-7.47957	-6.24612	-9.93113	-8.73523	-7.47698	-8.12204	-12.0737	-10.9384		7.65226	19.2375	9.13151	7.40569	14.7896	7.47957	6.24612	9.93113	8.73523	7.47698	8.12204	12.0737	10.9384
-12.6626	-11.169	-9.19301	-9.17179	-8.17857	-8.21784	-12.0394	-17.1322	-7.26345	-10.1614	-7.99388	-8.5336	-20.4422		12.6626	11.169	9.19301	9.17179	8.17857	8.21784	12.0394	17.1322	7.26345	10.1614	7.99388	8.5336	20.4422
-6.20819	-11.029	-11.2687	-50.1232	-7.38218	-20.122	-12.3442	-10.0414	-5.06253	-11.0139	-16.5375	-10.2425	-7.13605		6.20819	11.029	11.2687	50.1232	7.38218	20.122	12.3442	10.0414	5.06253	11.0139	16.5375	10.2425	7.13605
-18.4444	-12.9637	-11.8801	-16.8485	-10.2939	-12.312	-10.3883	-19.5571	-5.97772	-9.30482	-6.64972	-11.8293	-8.47868		18.4444	12.9637	11.8801	16.8485	10.2939	12.312	10.3883	19.5571	5.97772	9.30482	6.64972	11.8293	8.47868
-12.1092	-23.9977	-8.64555	-68.4798	-9.06948	-10.2983	-7.21198	-16.1373	-5.18398	-12.1122	-7.50381	-8.53339	-12.75		12.1092	23.9977	8.64555	68.4798	9.06948	10.2983	7.21198	16.1373	5.18398	12.1122	7.50381	8.53339	12.75
-12.9861	-27.1602	-15.2995	-38.9891	-18.3879	-8.71172	-6.84321	-8.32154	-10.3686	-11.7458	-8.236	-7.06853	-7.61611		12.9861	27.1602	15.2995	38.9891	18.3879	8.71172	6.84321	8.32154	10.3686	11.7458	8.236	7.06853	7.61611
-6.3528	-16.0918	-11.2104	-24.9856	-7.37597	-13.3509	-23.0754	-15.3968	-10.1623	-14.7975	-7.62546	-13.9044	-7.8555		6.3528	16.0918	11.2104	24.9856	7.37597	13.3509	23.0754	15.3968	10.1623	14.7975	7.62546	13.9044	7.8555
-9.46639	-7.11887	-12.187	-9.95574	-9.42839	-7.00568	-6.16512	-31.2615	-16.6279	-11.5014	-10.6771	-26.4777	-14.6884		9.46639	7.11887	12.187	9.95574	9.42839	7.00568	6.16512	31.2615	16.6279	11.5014	10.6771	26.4777	14.6884
-6.10858	-8.64286	-8.34287	-7.1386	-9.66908	-14.3317	-5.85989	-30.8325	-17.9079	-7.22839	-8.10804	-7.43453	-7.18301		6.10858	8.64286	8.34287	7.1386	9.66908	14.3317	5.85989	30.8325	17.9079	7.22839	8.10804	7.43453	7.18301
-10.8219	-6.68788	-9.74746	-14.5615	-13.6969	-9.32803	-9.70461	-21.9796	-5.57578	-8.44897	-6.76453	-22.9375	-9.74097		10.8219	6.68788	9.74746	14.5615	13.6969	9.32803	9.70461	21.9796	5.57578	8.44897	6.76453	22.9375	9.74097
-11.6101	-8.07954	-11.0298	-10.7746	-12.8188	-7.62507	-22.8829	-12.9392	-18.8319	-13.4534	-7.61145	-28.6747	-15.2207		11.6101	8.07954	11.0298	10.7746	12.8188	7.62507	22.8829	12.9392	18.8319	13.4534	7.61145	28.6747	15.2207
-19.2544	-10.6395	-15.0586	-9.06185	-22.2204	-7.57733	-8.71974	-14.0378	-5.09032	-9.30298	-6.84916	-19.1532	-9.23604		19.2544	10.6395	15.0586	9.06185	22.2204	7.57733	8.71974	14.0378	5.09032	9.30298	6.84916	19.1532	9.23604
-6.07911	-19.6025	-14.266	-16.2004	-10.2507	-18.6275	-11.7098	-29.2945	-6.12137	-11.3772	-7.94546	-9.02134	-10.2109		6.07911	19.6025	14.266	16.2004	10.2507	18.6275	11.7098	29.2945	6.12137	11.3772	7.94546	9.02134	10.2109
-68.2277	-6.75337	-10.2989	-8.56167	-12.6271	-11.1211	-13.5392	-11.3456	-5.9325	-11.9874	-17.2223	-12.4393	-7.87721		68.2277	6.75337	10.2989	8.56167	12.6271	11.1211	13.5392	11.3456	5.9325	11.9874	17.2223	12.4393	7.87721
-6.28139	-9.68236	-16.5858	-17.9529	-8.84265	-7.15658	-10.2431	-15.0062	-6.23711	-15.2828	-9.64931	-9.02117	-7.86933		6.28139	9.68236	16.5858	17.9529	8.84265	7.15658	10.2431	15.0062	6.23711	15.2828	9.64931	9.02117	7.86933
-6.89486	-9.86412	-8.04177	-16.3636	-9.69206	-12.8337	-6.70274	-8.41411	-6.23604	-7.22613	-8.30286	-7.19011	-7.13514		6.89486	9.86412	8.04177	16.3636	9.69206	12.8337	6.70274	8.41411	6.23604	7.22613	8.30286	7.19011	7.13514
-9.23073	-11.0231	-14.2684	-10.1295	-8.46932	-11.8651	-6.33604	-10.8443	-5.25333	-8.4467	-17.8171	-8.65495	-7.01297		9.23073	11.0231	14.2684	10.1295	8.46932	11.8651	6.33604	10.8443	5.25333	8.4467	17.8171	8.65495	7.01297
-7.77523	-12.1138	-8.65356	-9.38696	-14.1417	-7.04383	-13.9036	-9.62217	-10.1903	-8.56789	-10.8579	-8.89902	-14.3261		7.77523	12.1138	8.65356	9.38696	14.1417	7.04383	13.9036	9.62217	10.1903	8.56789	10.8579	8.89902	14.3261
-14.9288	-7.53024	-11.767	-8.47114	-7.24394	-11.5605	-5.35824	-11.0236	-6.1349	-7.22485	-46.134	-7.1899	-12.9749		14.9288	7.53024	11.767	8.47114	7.24394	11.5605	5.35824	11.0236	6.1349	7.22485	46.134	7.1899	12.9749
-8.64515	-13.7251	-22.267	-7.30271	-13.4905	-10.4625	-5.7854	-15.6622	-12.3467	-12.4738	-77.2617	-8.28847	-7.10973		8.64515	13.7251	22.267	7.30271	13.4905	10.4625	5.7854	15.6622	12.3467	12.4738	77.2617	8.28847	7.10973
-6.99824	-9.44121	-8.47313	-15.9587	-7.13041	-14.9184	-5.23605	-14.8669	-6.72528	-10.3986	-11.8318	-9.14293	-7.461		6.99824	9.44121	8.47313	15.9587	7.13041	14.9184	5.23605	14.8669	6.72528	10.3986	11.8318	9.14293	7.461
-8.28445	-8.88926	-13.5392	-11.745	-8.04336	-9.97712	-6.1515	-15.2938	-11.6531	-11.4971	-23.6628	-7.18975	-9.77812		8.28445	8.88926	13.5392	11.745	8.04336	9.97712	6.1515	15.2938	11.6531	11.4971	23.6628	7.18975	9.77812
-29.2878	-18.7731	-11.5256	-14.4265	-11.0921	-7.04748	-4.99176	-16.2083	-5.91334	-8.56739	-10.3555	-8.89869	-9.16594		29.2878	18.7731	11.5256	14.4265	11.0921	7.04748	4.99176	16.2083	5.91334	8.56739	10.3555	8.89869	9.16594
-19.5378	-21.0304	-21.3523	-24.1812	-8.03974	-19.8061	-6.27092	-22.7997	-11.8331	-8.81152	-7.17994	-10.8518	-10.2582		19.5378	21.0304	21.3523	24.1812	8.03974	19.8061	6.27092	22.7997	11.8331	8.81152	7.17994	10.8518	10.2582
-22.6614	-14.132	-14.2762	-29.3656	-17.9605	-11.3837	-5.35531	-10.2257	-5.84736	-13.0833	-16.4567	-10.9737	-7.81044		22.6614	14.132	14.2762	29.3656	17.9605	11.3837	5.35531	10.2257	5.84736	13.0833	16.4567	10.9737	7.81044
-38.0066	-33.6792	-12.9367	-12.0154	-10.0807	-9.07137	-10.7848	-17.7311	-11.5135	-8.07747	-28.2851	-7.43353	-19.7557		38.0066	33.6792	12.9367	12.0154	10.0807	9.07137	10.7848	17.7311	11.5135	8.07747	28.2851	7.43353	19.7557
-6.86859	-8.64988	-47.2535	-37.7027	-7.86632	-7.05934	-7.6081	-14.4344	-8.76422	-21.3829	-6.91111	-16.955	-13.2836		6.86859	8.64988	47.2535	37.7027	7.86632	7.05934	7.6081	14.4344	8.76422	21.3829	6.91111	16.955	13.2836
-7.16577	-7.35823	-32.3008	-24.4424	-7.07112	-8.64636	-5.89861	-12.8465	-5.40316	-7.83251	-9.17476	-8.04384	-9.45473		7.16577	7.35823	32.3008	24.4424	7.07112	8.64636	5.89861	12.8465	5.40316	7.83251	9.17476	8.04384	9.45473
-8.42275	-14.4955	-26.1389	-9.66851	-8.33645	-15.5458	-11.5728	-13.4494	-14.1904	-8.80896	-7.29244	-13.1708	-7.62148		8.42275	14.4955	26.1389	9.66851	8.33645	15.5458	11.5728	13.4494	14.1904	8.80896	7.29244	13.1708	7.62148
-14.2679	-7.23214	-8.62399	-19.9822	-15.8883	-12.983	-11.6329	-9.29789	-11.0629	-18.8187	-7.67339	-12.9266	-7.00196		14.2679	7.23214	8.62399	19.9822	15.8883	12.983	11.6329	9.29789	11.0629	18.8187	7.67339	12.9266	7.00196
-10.4899	-23.3106	-10.0327	-10.2156	-9.11238	-7.31288	-6.32174	-10.5793	-6.77289	-22.4807	-11.9579	-14.1473	-8.46339		10.4899	23.3106	10.0327	10.2156	9.11238	7.31288	6.32174	10.5793	6.77289	22.4807	11.9579	14.1473	8.46339
-12.3441	-9.90492	-14.9158	-15.8911	-7.03123	-7.5044	-5.6497	-9.53992	-7.48433	-7.22172	-7.13896	-16.1004	-15.4084		12.3441	9.90492	14.9158	15.8911	7.03123	7.5044	5.6497	9.53992	7.48433	7.22172	7.13896	16.1004	15.4084
-11.7367	-6.05079	-10.9526	-12.7087	-13.1604	-18.7385	-9.0065	-29.005	-11.3678	-7.46586	-14.6481	-12.8045	-10.0315		11.7367	6.05079	10.9526	12.7087	13.1604	18.7385	9.0065	29.005	11.3678	7.46586	14.6481	12.8045	10.0315
-41.6599	-19.9641	-11.0172	-14.7586	-8.49533	-7.50857	-5.22093	-16.854	-5.40263	-9.29644	-9.69286	-12.9264	-15.9971		41.6599	19.9641	11.0172	14.7586	8.49533	7.50857	5.22093	16.854	5.40263	9.29644	9.69286	12.9264	15.9971
-13.6447	-6.81889	-38.4848	-12.307	-8.1289	-9.40092	-5.09844	-16.9753	-5.3547	-10.0288	-6.86093	-11.3394	-10.3799		13.6447	6.81889	38.4848	12.307	8.1289	9.40092	5.09844	16.9753	5.3547	10.0288	6.86093	11.3394	10.3799
-6.33415	-7.97845	-9.00663	-18.331	-12.1428	-9.78246	-5.52207	-8.97904	-8.20672	-9.17425	-6.97459	-13.1704	-7.32422		6.33415	7.97845	9.00663	18.331	12.1428	9.78246	5.52207	8.97904	8.20672	9.17425	6.97459	13.1704	7.32422
-9.87746	-17.7349	-8.6471	-23.0257	-10.0625	-23.4012	-7.22942	-15.1427	-9.40853	-7.09841	-7.39412	-8.65372	-7.75848		9.87746	17.7349	8.6471	23.0257	10.0625	23.4012	7.22942	15.1427	9.40853	7.09841	7.39412	8.65372	7.75848
-8.82349	-12.4807	-9.94033	-12.7689	-7.37262	-11.196	-13.8817	-26.7384	-14.4669	-15.0329	-8.05141	-11.5834	-8.36223		8.82349	12.4807	9.94033	12.7689	7.37262	11.196	13.8817	26.7384	14.4669	15.0329	8.05141	11.5834	8.36223
-10.6005	-19.1885	-8.54084	-13.1305	-18.8313	-7.23627	-5.45603	-12.9437	-15.87	-12.2242	-10.3438	-11.9495	-7.87304		10.6005	19.1885	8.54084	13.1305	18.8313	7.23627	5.45603	12.9437	15.87	12.2242	10.3438	11.9495	7.87304
-21.4071	-8.9893	-19.2862	-10.7422	-9.46143	-7.05342	-9.23574	-8.97372	-14.3408	-11.6136	-11.319	-11.4611	-11.5347		21.4071	8.9893	19.2862	10.7422	9.46143	7.05342	9.23574	8.97372	14.3408	11.6136	11.319	11.4611	11.5347
-6.34014	-16.8412	-23.5608	-9.14751	-7.49418	-11.326	-7.15985	-18.8598	-6.81836	-7.09699	-11.7289	-7.31067	-12.7032		6.34014	16.8412	23.5608	9.14751	7.49418	11.326	7.15985	18.8598	6.81836	7.09699	11.7289	7.31067	12.7032
-9.0976	-11.9476	-15.1608	-13.8266	-7.6821	-11.205	-12.3455	-15.8659	-6.44644	-8.68381	-6.91434	-8.04304	-37.7269		9.0976	11.9476	15.1608	13.8266	7.6821	11.205	12.3455	15.8659	6.44644	8.68381	6.91434	8.04304	37.7269
-24.7256	-6.08263	-27.1247	-9.24778	-7.36962	-16.8206	-10.7573	-17.8168	-7.3411	-8.92778	-14.3293	-13.1699	-16.3638		24.7256	6.08263	27.1247	9.24778	7.36962	16.8206	10.7573	17.8168	7.3411	8.92778	14.3293	13.1699	16.3638
-6.36388	-21.7657	-11.3225	-15.469	-7.02705	-7.48258	-5.62997	-10.1263	-11.3076	-15.1532	-20.7348	-11.583	-13.678		6.36388	21.7657	11.3225	15.469	7.02705	7.48258	5.62997	10.1263	11.3076	15.1532	20.7348	11.583	13.678
-9.33783	-6.01776	-25.666	-64.4172	-10.4408	-7.30104	-12.7707	-33.6221	-5.13811	-10.5136	-6.95676	-12.4375	-32.8404		9.33783	6.01776	25.666	64.4172	10.4408	7.30104	12.7707	33.6221	5.13811	10.5136	6.95676	12.4375	32.8404
-9.59084	-7.78767	-30.249	-13.9255	-23.2527	-7.61088	-6.54496	-33.4941	-5.56281	-7.21769	-8.98949	-14.1463	-22.8293		9.59084	7.78767	30.249	13.9255	23.2527	7.61088	6.54496	33.4941	5.56281	7.21769	8.98949	14.1463	22.8293
-8.50603	-6.44475	-22.7521	-8.85053	-19.0319	-14.1472	-6.48388	-8.65178	-5.85351	-18.3258	-9.50295	-10.8503	-20.9975		8.50603	6.44475	22.7521	8.85053	19.0319	14.1472	6.48388	8.65178	5.85351	18.3258	9.50295	10.8503	20.9975
-10.4619	-15.2937	-21.7196	-28.5379	-8.53348	-18.3622	-22.3513	-8.46856	-8.47605	-8.92625	-17.6263	-20.4935	-10.1297		10.4619	15.2937	21.7196	28.5379	8.53348	18.3622	22.3513	8.46856	8.47605	8.92625	17.6263	20.4935	10.1297
-18.1347	-14.9816	-14.9523	-14.5497	-9.67646	-13.6689	-5.07806	-20.4909	-5.11892	-11.0005	-7.1758	-10.972	-8.40712		18.1347	14.9816	14.9523	14.5497	9.67646	13.6689	5.07806	20.4909	5.11892	11.0005	7.1758	10.972	8.40712
-15.7511	-10.3996	-19.2368	-29.4107	-14.6713	-11.6657	-7.94388	-22.2598	-5.05681	-10.7556	-7.86991	-13.9015	-7.28994		15.7511	10.3996	19.2368	29.4107	14.6713	11.6657	7.94388	22.2598	5.05681	10.7556	7.86991	13.9015	7.28994
-6.39753	-6.60459	-9.76333	-9.80276	-32.9102	-18.5925	-9.03967	-22.3184	-6.93069	-9.53455	-23.4176	-8.77457	-21.8128		6.39753	6.60459	9.76333	9.80276	32.9102	18.5925	9.03967	22.3184	6.93069	9.53455	23.4176	8.77457	21.8128
-10.1457	-24.9067	-10.8044	-8.74482	-14.2287	-7.72927	-5.19056	-11.5761	-5.07306	-11.4874	-16.8119	-7.798	-8.01795		10.1457	24.9067	10.8044	8.74482	14.2287	7.72927	5.19056	11.5761	5.07306	11.4874	16.8119	7.798	8.01795
-6.11864	-8.54907	-9.01881	-12.9541	-9.57953	-7.6685	-9.1549	-16.3965	-14.039	-24.793	-20.5735	-7.55381	-9.35908		6.11864	8.54907	9.01881	12.9541	9.57953	7.6685	9.1549	16.3965	14.039	24.793	20.5735	7.55381	9.35908
-14.2839	-17.9424	-33.8611	-15.6314	-11.5114	-7.18042	-22.1539	-12.4889	-6.30146	-14.1726	-9.56912	-8.77449	-13.3717		14.2839	17.9424	33.8611	15.6314	11.5114	7.18042	22.1539	12.4889	6.30146	14.1726	9.56912	8.77449	13.3717
-9.34602	-14.6432	-8.17857	-10.0122	-8.09309	-9.92891	-5.79598	-19.9956	-13.2582	-11.1208	-7.34327	-9.62894	-16.5443		9.34602	14.6432	8.17857	10.0122	8.09309	9.92891	5.79598	19.9956	13.2582	11.1208	7.34327	9.62894	16.5443
-36.8122	-27.6417	-13.6544	-14.5264	-16.4277	-7.25349	-4.99852	-19.2016	-5.48163	-7.82488	-30.3927	-8.65237	-8.24317		36.8122	27.6417	13.6544	14.5264	16.4277	7.25349	4.99852	19.2016	5.48163	7.82488	30.3927	8.65237	8.24317
-16.7937	-43.9332	-12.9839	-11.2893	-23.5287	-12.9374	-8.28855	-9.49307	-5.20558	-21.3741	-8.9813	-7.6758	-14.9414		16.7937	43.9332	12.9839	11.2893	23.5287	12.9374	8.28855	9.49307	5.20558	21.3741	8.9813	7.6758	14.9414
-7.63911	-8.58955	-12.0675	-11.224	-10.4556	-14.5899	-7.7384	-16.8157	-9.28095	-7.57917	-7.13583	-7.30951	-11.4787		7.63911	8.58955	12.0675	11.224	10.4556	14.5899	7.7384	16.8157	9.28095	7.57917	7.13583	7.30951	11.4787
-20.5228	-7.17825	-12.8214	-9.083	-16.0083	-7.20644	-5.29577	-15.411	-18.2032	-16.4899	-23.3663	-8.89633	-7.53622		20.5228	7.17825	12.8214	9.083	16.0083	7.20644	5.29577	15.411	18.2032	16.4899	23.3663	8.89633	7.53622
-9.54079	-6.98814	-9.05538	-15.3644	-10.875	-7.52039	-5.96712	-11.7483	-7.94456	-7.21154	-6.63466	-8.40804	-10.3409		9.54079	6.98814	9.05538	15.3644	10.875	7.52039	5.96712	11.7483	7.94456	7.21154	6.63466	8.40804	10.3409
-6.55609	-8.26304	-23.1413	-12.9102	-8.11218	-11.1855	-5.11168	-42.876	-5.20951	-8.67629	-6.75653	-15.7322	-8.75292		6.55609	8.26304	23.1413	12.9102	8.11218	11.1855	5.11168	42.876	5.20951	8.67629	6.75653	15.7322	8.75292
-21.5714	-6.85308	-12.6128	-14.5393	-7.00664	-8.26242	-9.38194	-10.8904	-6.79219	-15.9999	-11.6302	-11.7039	-7.39064		21.5714	6.85308	12.6128	14.5393	7.00664	8.26242	9.38194	10.8904	6.79219	15.9999	11.6302	11.7039	7.39064
-6.00842	-6.77548	-9.14373	-40.5983	-7.46917	-16.6853	-9.44208	-19.3731	-6.35589	-17.7087	-6.68657	-7.06506	-7.02041		6.00842	6.77548	9.14373	40.5983	7.46917	16.6853	9.44208	19.3731	6.35589	17.7087	6.68657	7.06506	7.02041
-14.3109	-24.5964	-10.6218	-30.5201	-9.77614	-7.41007	-12.9813	-23.8858	-6.77355	-7.69847	-13.9298	-7.67541	-12.9898		14.3109	24.5964	10.6218	30.5201	9.77614	7.41007	12.9813	23.8858	6.77355	7.69847	13.9298	7.67541	12.9898
-6.74302	-12.1941	-10.07	-7.62483	-7.88353	-14.9188	-16.2748	-17.6588	-7.01751	-17.8298	-14.2916	-16.7086	-7.7389		6.74302	12.1941	10.07	7.62483	7.88353	14.9188	16.2748	17.6588	7.01751	17.8298	14.2916	16.7086	7.7389
-6.99115	-19.0865	-12.0405	-16.8353	-14.2005	-15.7126	-9.43455	-14.4827	-7.01484	-11.4819	-10.9005	-7.79745	-13.5876		6.99115	19.0865	12.0405	16.8353	14.2005	15.7126	9.43455	14.4827	7.01484	11.4819	10.9005	7.79745	13.5876
-6.44198	-10.4749	-42.2257	-14.8171	-7.7883	-7.84148	-12.1796	-8.19527	-14.3952	-10.6262	-8.54916	-14.2672	-9.55896		6.44198	10.4749	42.2257	14.8171	7.7883	7.84148	12.1796	8.19527	14.3952	10.6262	8.54916	14.2672	9.55896
-18.0402	-7.04123	-36.1041	-10.3605	-17.6997	-25.4862	-5.33746	-14.1128	-5.46102	-7.57269	-7.07549	-15.1216	-19.8033		18.0402	7.04123	36.1041	10.3605	17.6997	25.4862	5.33746	14.1128	5.46102	7.57269	7.07549	15.1216	19.8033
-6.13987	-20.954	-12.0859	-32.8808	-7.25323	-17.6269	-5.15394	-8.06971	-16.8051	-7.93792	-11.8692	-7.55326	-12.3512		6.13987	20.954	12.0859	32.8808	7.25323	17.6269	5.15394	8.06971	16.8051	7.93792	11.8692	7.55326	12.3512
-10.3526	-9.89165	-14.4614	-7.18222	-18.3449	-21.5986	-6.2493	-20.9467	-22.414	-8.67019	-7.62677	-10.8491	-12.2129		10.3526	9.89165	14.4614	7.18222	18.3449	21.5986	6.2493	20.9467	22.414	8.67019	7.62677	10.8491	12.2129
-6.50758	-10.0099	-14.2981	-16.8123	-11.1918	-8.04997	-16.4413	-10.689	-7.64303	-8.91432	-9.81604	-9.26214	-9.0315		6.50758	10.0099	14.2981	16.8123	11.1918	8.04997	16.4413	10.689	7.64303	8.91432	9.81604	9.26214	9.0315
-19.1451	-11.407	-12.6799	-7.59033	-7.03898	-7.13736	-5.33223	-17.3399	-14.4603	-11.9658	-20.0163	-10.727	-8.65834		19.1451	11.407	12.6799	7.59033	7.03898	7.13736	5.33223	17.3399	14.4603	11.9658	20.0163	10.727	8.65834
-12.1979	-13.1133	-23.5252	-22.0484	-8.00734	-7.20353	-5.13829	-13.9812	-8.03732	-15.0174	-6.89277	-7.67523	-7.9258		12.1979	13.1133	23.5252	22.0484	8.00734	7.20353	5.13829	13.9812	8.03732	15.0174	6.89277	7.67523	7.9258
-12.2607	-7.48735	-11.2448	-8.6808	-9.03583	-13.9191	-5.01582	-10.0733	-10.7194	-12.0868	-19.0607	-8.40764	-8.39684		12.2607	7.48735	11.2448	8.6808	9.03583	13.9191	5.01582	10.0733	10.7194	12.0868	19.0607	8.40764	8.39684
-9.02716	-6.98788	-10.1231	-23.2673	-7.92731	-13.2478	-5.01559	-18.0688	-5.33521	-9.1568	-10.5085	-12.436	-10.0964		9.02716	6.98788	10.1231	23.2673	7.92731	13.2478	5.01559	18.0688	5.33521	9.1568	10.5085	12.436	10.0964
-10.6753	-9.00079	-21.0228	-20.4237	-9.85544	-30.3993	-5.93109	-24.9646	-19.9752	-8.79058	-20.2155	-10.971	-11.1842		10.6753	9.00079	21.0228	20.4237	9.85544	30.3993	5.93109	24.9646	19.9752	8.79058	20.2155	10.971	11.1842
-10.7365	-6.37578	-35.2762	-28.2252	-8.3869	-15.8193	-7.82107	-9.88869	-6.29937	-9.64354	-19.0812	-7.431	-13.3738		10.7365	6.37578	35.2762	28.2252	8.3869	15.8193	7.82107	9.88869	6.29937	9.64354	19.0812	7.431	13.3738
-6.03688	-6.68087	-8.41915	-7.22674	-16.2577	-9.10714	-11.6512	-8.72869	-24.282	-7.81236	-12.3657	-9.99436	-19.3537		6.03688	6.68087	8.41915	7.22674	16.2577	9.10714	11.6512	8.72869	24.282	7.81236	12.3657	9.99436	19.3537
-6.03695	-33.4131	-16.5921	-12.6442	-7.64967	-7.03198	-5.11934	-11.5973	-5.04909	-8.66662	-6.84275	-7.06467	-9.22001		6.03695	33.4131	16.5921	12.6442	7.64967	7.03198	5.11934	11.5973	5.04909	8.66662	6.84275	7.06467	9.22001
-8.96932	-6.49361	-17.4796	-34.4325	-7.07378	-8.67998	-5.24124	-8.60633	-5.15117	-10.3752	-8.51736	-10.2385	-7.25154		8.96932	6.49361	17.4796	34.4325	7.07378	8.67998	5.24124	8.60633	5.15117	10.3752	8.51736	10.2385	7.25154
-10.5572	-6.67034	-28.8891	-7.81818	-15.6085	-10.0251	-9.63396	-9.58203	-5.02213	-10.3745	-18.1514	-13.9006	-8.35007		10.5572	6.67034	28.8891	7.81818	15.6085	10.0251	9.63396	9.58203	5.02213	10.3745	18.1514	13.9006	8.35007
-7.6298	-8.92749	-12.0742	-7.55802	-11.3823	-9.29309	-7.43532	-9.15364	-17.2706	-9.64203	-30.2251	-7.30863	-11.6434		7.6298	8.92749	12.0742	7.55802	11.3823	9.29309	7.43532	9.15364	17.2706	9.64203	30.2251	7.30863	11.6434
-12.6967	-6.60539	-11.2353	-13.5388	-7.16403	-12.8944	-6.15257	-9.51962	-5.41565	-47.8491	-8.48649	-9.01756	-28.7235		12.6967	6.60539	11.2353	13.5388	7.16403	12.8944	6.15257	9.51962	5.41565	47.8491	8.48649	9.01756	28.7235
-7.75296	-12.2759	-14.4159	-15.1253	-7.46853	-9.17408	-9.75331	-10.1286	-7.17553	-8.5416	-6.64925	-22.0791	-7.96174		7.75296	12.2759	14.4159	15.1253	7.46853	9.17408	9.75331	10.1286	7.17553	8.5416	6.64925	22.0791	7.96174
-7.26631	-8.29795	-19.3009	-7.61708	-12.5859	-15.4051	-6.63691	-25.9961	-16.1988	-15.2555	-6.74574	-12.4355	-16.259		7.26631	8.29795	19.3009	7.61708	12.5859	15.4051	6.63691	25.9961	16.1988	15.2555	6.74574	12.4355	16.259
-6.9619	-26.7289	-13.9919	-10.9735	-10.1285	-9.97803	-5.17073	-8.89962	-10.3539	-11.8374	-6.86767	-11.3368	-10.5148		6.9619	26.7289	13.9919	10.9735	10.1285	9.97803	5.17073	8.89962	10.3539	11.8374	6.86767	11.3368	10.5148
-16.1785	-16.0458	-17.3508	-12.1774	-7.23491	-7.9062	-5.10771	-14.0256	-10.2314	-7.56474	-7.96076	-8.77335	-17.5934		16.1785	16.0458	17.3508	12.1774	7.23491	7.9062	5.10771	14.0256	10.2314	7.56474	7.96076	8.77335	17.5934
-6.2337	-13.1133	-10.3961	-19.74	-7.05169	-15.9653	-6.20582	-18.9689	-10.9422	-10.0056	-6.73604	-59.9205	-34.4328		6.2337	13.1133	10.3961	19.74	7.05169	15.9653	6.20582	18.9689	10.9422	10.0056	6.73604	59.9205	34.4328
-7.70178	-16.8323	-8.20195	-14.8488	-11.8483	-13.3412	-5.10713	-8.95463	-6.5969	-9.63883	-10.0287	-10.8482	-12.337		7.70178	16.8323	8.20195	14.8488	11.8483	13.3412	5.10713	8.95463	6.5969	9.63883	10.0287	10.8482	12.337
-8.98819	-24.0918	-8.26356	-32.7141	-10.836	-7.17801	-5.2281	-10.0455	-5.11772	-14.8872	-7.34161	-8.89507	-11.1063		8.98819	24.0918	8.26356	32.7141	10.836	7.17801	5.2281	10.0455	5.11772	14.8872	7.34161	8.89507	11.1063
-7.64723	-9.18677	-12.2977	-8.77317	-12.5202	-13.408	-5.28905	-11.1415	-9.0068	-10.6147	-7.69064	-27.0835	-19.3958		7.64723	9.18677	12.2977	8.77317	12.5202	13.408	5.28905	11.1415	9.0068	10.6147	7.69064	27.0835	19.3958
-36.3353	-21.936	-14.9842	-9.84459	-11.4818	-8.83166	-5.22767	-13.7024	-5.46038	-8.05072	-9.39304	-12.0689	-14.489		36.3353	21.936	14.9842	9.84459	11.4818	8.83166	5.22767	13.7024	5.46038	8.05072	9.39304	12.0689	14.489
-15.9504	-11.4797	-8.81999	-7.50496	-17.474	-18.541	-5.28538	-16.6905	-7.74137	-7.19622	-21.8311	-8.40672	-7.15757		15.9504	11.4797	8.81999	7.50496	17.474	18.541	5.28538	16.6905	7.74137	7.19622	21.8311	8.40672	7.15757
-12.2279	-11.3512	-13.7642	-8.84381	-15.4409	-8.65493	-10.4726	-12.2339	-25.4247	-7.9283	-17.0624	-10.3597	-8.25606		12.2279	11.3512	13.7642	8.84381	15.4409	8.65493	10.4726	12.2339	25.4247	7.9283	17.0624	10.3597	8.25606
-9.11831	-10.9191	-17.7932	-9.10144	-13.9744	-7.31318	-6.68577	-10.2182	-9.97112	-9.39307	-12.5433	-7.18586	-14.7066		9.11831	10.9191	17.7932	9.10144	13.9744	7.31318	6.68577	10.2182	9.97112	9.39307	12.5433	7.18586	14.7066
-7.65473	-13.2352	-17.8691	-8.08781	-10.8383	-11.4115	-6.56341	-8.14295	-6.09293	-15.8627	-6.83287	-8.40653	-10.4254		7.65473	13.2352	17.8691	8.08781	10.8383	11.4115	6.56341	8.14295	6.09293	15.8627	6.83287	8.40653	10.4254
-6.18995	-6.32986	-10.1809	-20.1643	-11.4409	-18.2488	-5.40367	-15.5887	-5.54351	-7.31766	-11.6897	-13.4114	-10.0315		6.18995	6.32986	10.1809	20.1643	11.4409	18.2488	5.40367	15.5887	5.54351	7.31766	11.6897	13.4114	10.0315
-11.077	-10.2315	-13.4807	-7.08966	-19.9354	-7.01852	-7.11247	-14.0623	-5.72652	-7.92692	-11.1637	-10.3596	-11.7392		11.077	10.2315	13.4807	7.08966	19.9354	7.01852	7.11247	14.0623	5.72652	7.92692	11.1637	10.3596	11.7392
-6.07462	-8.08929	-10.8587	-9.80756	-7.29994	-7.68995	-8.08897	-12.4748	-5.10267	-14.7625	-8.34355	-13.6554	-9.41826		6.07462	8.08929	10.8587	9.80756	7.29994	7.68995	8.08897	12.4748	5.10267	14.7625	8.34355	13.6554	9.41826
-6.25846	-20.0433	-11.1117	-67.0407	-7.10958	-26.1228	-5.464	-8.38534	-5.70262	-7.19396	-12.9466	-15.3642	-10.7587		6.25846	20.0433	11.1117	67.0407	7.10958	26.1228	5.464	8.38534	5.70262	7.19396	12.9466	15.3642	10.7587
-6.74862	-10.148	-25.0439	-9.4576	-7.29244	-9.15514	-6.25736	-28.0967	-6.29742	-7.07188	-6.96493	-12.3124	-10.265		6.74862	10.148	25.0439	9.4576	7.29244	9.15514	6.25736	28.0967	6.29742	7.07188	6.96493	12.3124	10.265
-11.1462	-6.05348	-15.4035	-31.4217	-12.1721	-7.63088	-7.23274	-22.9085	-5.07661	-7.07186	-8.91376	-10.4813	-14.0177		11.1462	6.05348	15.4035	31.4217	12.1721	7.63088	7.23274	22.9085	5.07661	7.07186	8.91376	10.4813	14.0177
-16.3349	-8.12458	-15.0425	-14.8587	-7.7391	-21.9782	-5.27955	-13.5088	-18.1299	-7.19376	-14.5183	-24.2752	-19.6315		16.3349	8.12458	15.0425	14.8587	7.7391	21.9782	5.27955	13.5088	18.1299	7.19376	14.5183	24.2752	19.6315
-14.0773	-12.8226	-15.7788	-12.8247	-14.5701	-7.27164	-11.8704	-13.6907	-6.64464	-7.55995	-10.0992	-12.4344	-12.6635		14.0773	12.8226	15.7788	12.8247	14.5701	7.27164	11.8704	13.6907	6.64464	7.55995	10.0992	12.4344	12.6635
-11.1488	-7.32434	-14.0104	-7.75027	-8.22989	-7.58271	-8.14133	-13.0767	-15.2328	-7.68194	-6.76475	-7.91757	-9.22628		11.1488	7.32434	14.0104	7.75027	8.22989	7.58271	8.14133	13.0767	15.2328	7.68194	6.76475	7.91757	9.22628
-7.18594	-15.7434	-12.3105	-24.7778	-10.9702	-7.94988	-5.02607	-8.19369	-9.73584	-10.001	-10.5117	-11.0914	-11.2672		7.18594	15.7434	12.3105	24.7778	10.9702	7.94988	5.02607	8.19369	9.73584	10.001	10.5117	11.0914	11.2672
-12.3746	-6.69536	-22.0881	-22.3186	-7.84351	-13.6912	-5.27008	-26.4407	-7.71757	-7.55954	-10.5866	-9.01618	-8.32171		12.3746	6.69536	22.0881	22.3186	7.84351	13.6912	5.27008	26.4407	7.71757	7.55954	10.5866	9.01618	8.32171
-6.08802	-6.2617	-8.97148	-10.477	-12.8794	-7.95636	-10.0897	-10.6299	-5.70172	-8.65795	-6.72683	-7.67324	-9.3945		6.08802	6.2617	8.97148	10.477	12.8794	7.95636	10.0897	10.6299	5.70172	8.65795	6.72683	7.67324	9.3945
-6.46032	-6.68554	-16.9265	-13.7564	-8.23919	-9.66689	-16.9239	-21.7381	-5.07283	-7.19266	-10.872	-12.0678	-11.5915		6.46032	6.68554	16.9265	13.7564	8.23919	9.66689	16.9239	21.7381	5.07283	7.19266	10.872	12.0678	11.5915
-29.7875	-12.178	-14.6125	-39.0026	-7.1302	-9.42477	-9.11128	-12.4593	-7.08644	-7.3142	-7.5706	-14.1429	-13.782		29.7875	12.178	14.6125	39.0026	7.1302	9.42477	9.11128	12.4593	7.08644	7.3142	7.5706	14.1429	13.782
-10.5018	-6.37861	-38.1725	-29.7216	-14.2609	-8.26647	-15.7022	-33.2094	-5.37643	-8.41283	-8.42004	-13.7767	-7.3027		10.5018	6.37861	38.1725	29.7216	14.2609	8.26647	15.7022	33.2094	5.37643	8.41283	8.42004	13.7767	7.3027
-13.981	-8.5626	-17.4329	-15.4984	-8.76641	-10.957	-5.26457	-16.849	-5.98665	-7.19212	-10.2444	-11.9456	-8.75165		13.981	8.5626	17.4329	15.4984	8.76641	10.957	5.26457	16.849	5.98665	7.19212	10.2444	11.9456	8.75165
-18.0713	-15.621	-13.8349	-11.039	-8.15576	-7.35905	-7.03266	-25.8207	-6.16946	-8.29074	-6.66752	-18.0491	-7.04254		18.0713	15.621	13.8349	11.039	8.15576	7.35905	7.03266	25.8207	6.16946	8.29074	6.66752	18.0491	7.04254
-8.30722	-6.03709	-18.7912	-7.46656	-14.495	-12.6088	-5.38464	-8.60834	-7.38742	-12.1962	-18.6811	-7.30687	-8.23807		8.30722	6.03709	18.7912	7.46656	14.495	12.6088	5.38464	8.60834	7.38742	12.1962	18.6811	7.30687	8.23807
-13.7412	-9.08836	-11.2254	-14.5306	-7.82225	-7.54303	-5.20097	-9.9509	-5.92229	-7.67932	-8.86615	-10.2363	-7.98693		13.7412	9.08836	11.2254	14.5306	7.82225	7.54303	5.20097	9.9509	5.92229	7.67932	8.86615	10.2363	7.98693
-8.18782	-14.031	-10.1909	-9.82694	-8.85487	-11.8767	-12.5781	-9.15568	-5.06611	-16.8343	-20.8567	-8.8934	-7.01026		8.18782	14.031	10.1909	9.82694	8.85487	11.8767	12.5781	9.15568	5.06611	16.8343	20.8567	8.8934	7.01026
-9.46964	-8.03927	-13.0122	-18.1851	-7.17467	-7.05529	-7.57314	-19.7112	-25.2655	-11.0963	-7.15319	-11.2126	-11.1332		9.46964	8.03927	13.0122	18.1851	7.17467	7.05529	7.57314	19.7112	25.2655	11.0963	7.15319	11.2126	11.1332
-8.86132	-6.45208	-22.7791	-63.1625	-9.41604	-12.9783	-9.46477	-10.9828	-5.36673	-7.79999	-18.0166	-19.5133	-35.1683		8.86132	6.45208	22.7791	63.1625	9.41604	12.9783	9.46477	10.9828	5.36673	7.79999	18.0166	19.5133	35.1683
-10.8773	-28.2974	-20.1013	-29.5836	-7.88989	-10.7816	-25.5103	-10.1883	-13.6501	-7.18814	-44.1297	-8.64891	-8.77589		10.8773	28.2974	20.1013	29.5836	7.88989	10.7816	25.5103	10.1883	13.6501	7.18814	44.1297	8.64891	8.77589
-6.23907	-24.1369	-9.6114	-11.88	-7.97702	-7.36593	-12.8757	-18.1226	-5.83234	-18.4182	-12.4888	-7.91647	-7.79545		6.23907	24.1369	9.6114	11.88	7.97702	7.36593	12.8757	18.1226	5.83234	18.4182	12.4888	7.91647	7.79545
-10.2685	-11.1936	-13.5218	-35.8016	-17.4911	-7.18662	-5.3064	-15.7412	-6.0594	-10.9705	-8.33759	-9.74745	-16.3399		10.2685	11.1936	13.5218	35.8016	17.4911	7.18662	5.3064	15.7412	6.0594	10.9705	8.33759	9.74745	16.3399
-16.9261	-9.48001	-23.4198	-7.89166	-9.79875	-7.12561	-9.08955	-23.0043	-18.6866	-8.8952	-6.75042	-8.64882	-14.1345		16.9261	9.48001	23.4198	7.89166	9.79875	7.12561	9.08955	23.0043	18.6866	8.8952	6.75042	8.64882	14.1345
-9.29779	-8.98256	-15.0033	-9.41719	-7.72299	-7.06538	-21.9637	-11.2854	-6.00387	-18.1722	-6.62813	-8.03846	-7.53921		9.29779	8.98256	15.0033	9.41719	7.72299	7.06538	21.9637	11.2854	6.00387	18.1722	6.62813	8.03846	7.53921
-19.8581	-6.29056	-19.0386	-7.0218	-7.10769	-7.74177	-7.19102	-9.39208	-8.80156	-7.67407	-19.9333	-17.3154	-43.0205		19.8581	6.29056	19.0386	7.0218	7.10769	7.74177	7.19102	9.39208	8.80156	7.67407	19.9333	17.3154	43.0205
-51.2331	-6.16323	-18.3101	-8.2843	-7.77734	-13.116	-10.3026	-11.7675	-6.29898	-7.18552	-7.11485	-12.1885	-11.0083		51.2331	6.16323	18.3101	8.2843	7.77734	13.116	10.3026	11.7675	6.29898	7.18552	7.11485	12.1885	11.0083
-6.49576	-11.9904	-16.9694	-8.34096	-14.3513	-14.338	-17.3194	-9.50889	-5.13252	-8.52808	-36.166	-9.01463	-16.1295		6.49576	11.9904	16.9694	8.34096	14.3513	14.338	17.3194	9.50889	5.13252	8.52808	36.166	9.01463	16.1295
-13.5774	-13.2708	-14.3479	-25.9788	-16.6449	-7.93119	-6.27173	-15.1188	-8.05545	-7.55152	-7.60031	-8.03798	-11.5959		13.5774	13.2708	14.3479	25.9788	16.6449	7.93119	6.27173	15.1188	8.05545	7.55152	7.60031	8.03798	11.5959
-7.65795	-12.4736	-21.918	-13.0723	-10.7808	-8.67016	-5.60028	-9.07595	-5.34283	-8.03979	-13.9429	-9.86903	-10.3746		7.65795	12.4736	21.918	13.0723	10.7808	8.67016	5.60028	9.07595	5.34283	8.03979	13.9429	9.86903	10.3746
-14.128	-14.4871	-12.2786	-20.3265	-8.3281	-9.58617	-8.70849	-18.9611	-39.9424	-7.67357	-26.2645	-11.2117	-8.66333		14.128	14.4871	12.2786	20.3265	8.3281	9.58617	8.70849	18.9611	39.9424	7.67357	26.2645	11.2117	8.66333
-17.4875	-6.67259	-8.63449	-12.3275	-7.96089	-8.73748	-9.92841	-14.6256	-6.06567	-8.40575	-11.5902	-10.7234	-33.6741		17.4875	6.67259	8.63449	12.3275	7.96089	8.73748	9.92841	14.6256	6.06567	8.40575	11.5902	10.7234	33.6741
-7.23412	-6.30623	-8.26889	-17.4488	-7.89773	-18.8103	-5.96075	-9.55943	-18.2715	-7.79538	-7.68343	-8.89233	-13.4083		7.23412	6.30623	8.26889	17.4488	7.89773	18.8103	5.96075	9.55943	18.2715	7.79538	7.68343	8.89233	13.4083
-7.23436	-35.7816	-8.88624	-20.2525	-8.61613	-20.7666	-5.7165	-10.719	-13.447	-7.18471	-7.52452	-19.2683	-11.6933		7.23436	35.7816	8.88624	20.2525	8.61613	20.7666	5.7165	10.719	13.447	7.18471	7.52452	19.2683	11.6933
-11.324	-6.11517	-17.7375	-12.1329	-7.75993	-7.70519	-7.3026	-11.8784	-5.61869	-7.30677	-7.64275	-7.18332	-8.15129		11.324	6.11517	17.7375	12.1329	7.75993	7.70519	7.3026	11.8784	5.61869	7.30677	7.64275	7.18332	8.15129
-9.92248	-7.32576	-9.56474	-11.749	-10.4446	-7.88835	-7.05838	-8.45932	-5.06913	-13.6541	-6.66585	-9.38055	-11.676		9.92248	7.32576	9.56474	11.749	10.4446	7.88835	7.05838	8.45932	5.06913	13.6541	6.66585	9.38055	11.676
-8.88598	-14.6413	-17.8159	-8.44995	-7.02607	-17.7155	-10.8424	-11.8742	-8.04673	-7.42825	-6.66556	-7.42742	-7.88685		8.88598	14.6413	17.8159	8.44995	7.02607	17.7155	10.8424	11.8742	8.04673	7.42825	6.66556	7.42742	7.88685
-7.78921	-14.0271	-10.9276	-13.9948	-7.51416	-16.1953	-7.54508	-15.3523	-8.46166	-33.1851	-6.65632	-8.52604	-10.4438		7.78921	14.0271	10.9276	13.9948	7.51416	16.1953	7.54508	15.3523	8.46166	33.1851	6.65632	8.52604	10.4438
-9.98656	-10.1669	-10.9897	-8.04172	-7.88015	-7.71149	-4.98148	-18.465	-15.8294	-8.03856	-7.0164	-9.01431	-7.37078		9.98656	10.1669	10.9897	8.04172	7.88015	7.71149	4.98148	18.465	15.8294	8.03856	7.0164	9.01431	7.37078
-20.9123	-34.5727	-8.61031	-7.91689	-21.2969	-28.7208	-7.17859	-27.742	-5.51403	-7.06195	-6.77175	-7.54947	-23.3612		20.9123	34.5727	8.61031	7.91689	21.2969	28.7208	7.17859	27.742	5.51403	7.06195	6.77175	7.54947	23.3612
-17.9259	-6.30268	-16.0045	-7.42195	-8.27093	-7.41968	-9.61737	-8.8812	-20.4672	-9.74748	-7.6259	-8.03775	-19.0851		17.9259	6.30268	16.0045	7.42195	8.27093	7.41968	9.61737	8.8812	20.4672	9.74748	7.6259	8.03775	19.0851
-10.2985	-18.5439	-22.0482	-8.6403	-14.9699	-34.5823	-5.28153	-12.5995	-5.18628	-12.921	-7.98482	-14.1412	-10.7789		10.2985	18.5439	22.0482	8.6403	14.9699	34.5823	5.28153	12.5995	5.18628	12.921	7.98482	14.1412	10.7789
-10.5428	-12.0724	-11.1268	-9.94038	-19.0752	-23.4176	-6.7462	-8.93728	-7.38042	-10.7236	-8.34617	-11.8219	-9.78608		10.5428	12.0724	11.1268	9.94038	19.0752	23.4176	6.7462	8.93728	7.38042	10.7236	8.34617	11.8219	9.78608
-8.34564	-38.0661	-13.3943	-17.6841	-13.4421	-20.7342	-5.83056	-14.8576	-5.09875	-10.8454	-8.45817	-7.67146	-11.7389		8.34564	38.0661	13.3943	17.6841	13.4421	20.7342	5.83056	14.8576	5.09875	10.8454	8.45817	7.67146	11.7389
-9.81057	-14.244	-17.1791	-7.66116	-10.1413	-9.63253	-6.07402	-13.0868	-6.13624	-7.30534	-6.60781	-13.7749	-8.18082		9.81057	14.244	17.1791	7.66116	10.1413	9.63253	6.07402	13.0868	6.13624	7.30534	6.60781	13.7749	8.18082
-9.93343	-9.78738	-26.0435	-8.56043	-15.3581	-7.13015	-5.03427	-24.0115	-6.25808	-8.15982	-6.83606	-24.6392	-8.78808		9.93343	9.78738	26.0435	8.56043	15.3581	7.13015	5.03427	24.0115	6.25808	8.15982	6.83606	24.6392	8.78808
-21.3472	-8.31472	-17.7434	-7.155	-11.9974	-7.31954	-6.68149	-22.1802	-7.28955	-13.7742		-7.5492	-14.9973		21.3472	8.31472	17.7434	7.155	11.9974	7.31954	6.68149	22.1802	7.28955	13.7742		7.5492	14.9973
-6.39418	-9.52355	-8.58955	-10.5381	-8.55996	-7.99147	-5.9468	-10.5221	-12.4701	-10.356		-9.74643	-8.28025		6.39418	9.52355	8.58955	10.5381	8.55996	7.99147	5.9468	10.5221	12.4701	10.356		9.74643	8.28025
-6.27215	-6.04362	-9.32693	-37.5006	-35.0961	-22.519	-5.82459	-20.6515	-10.1467	-10.3558		-7.67114	-7.54669		6.27215	6.04362	9.32693	37.5006	35.0961	22.519	5.82459	20.6515	10.1467	10.3558		7.67114	7.54669
-11.3996	-31.7965	-12.3228	-22.4157	-11.8645	-8.48623	-6.54606	-14.299	-5.18553	-7.05888		-8.28148	-15.8408		11.3996	31.7965	12.3228	22.4157	11.8645	8.48623	6.54606	14.299	5.18553	7.05888		8.28148	15.8408
-9.7552	-8.52248	-25.9401	-17.2802	-11.8027	-29.9825	-19.4764	-14.9074	-5.47996	-9.74437		-8.76975	-8.13575		9.7552	8.52248	25.9401	17.2802	11.8027	29.9825	19.4764	14.9074	5.47996	9.74437		8.76975	8.13575
-7.25534	-30.823	-12.5837	-15.4406	-9.78089	-12.0395	-7.86498	-18.5693	-13.0296	-7.42483		-16.216	-7.64199		7.25534	30.823	12.5837	15.4406	9.78089	12.0395	7.86498	18.5693	13.0296	7.42483		16.216	7.64199
-13.5421	-16.3456	-21.1901	-7.19349	-13.5347	-7.64539	-5.29486	-9.59634	-25.4653	-20.8524		-17.8029	-9.46821		13.5421	16.3456	21.1901	7.19349	13.5347	7.64539	5.29486	9.59634	25.4653	20.8524		17.8029	9.46821
-7.80616	-8.39477	-9.71716	-18.3454	-8.15321	-15.6469	-5.78112	-16.9803	-5.13759	-7.91288		-8.52551	-16.3036		7.80616	8.39477	9.71716	18.3454	8.15321	15.6469	5.78112	16.9803	5.13759	7.91288		8.52551	16.3036
-10.4919	-6.5004	-8.37818	-8.94129	-8.03063	-7.60299	-7.97196	-23.5715	-6.35808	-7.18032		-11.3331	-9.79464		10.4919	6.5004	8.37818	8.94129	8.03063	7.60299	7.97196	23.5715	6.35808	7.18032		11.3331	9.79464
-6.64709	-25.9085	-20.8951	-27.3673	-17.2425	-8.40767	-5.58916	-14.3546	-5.99155	-10.2314		-17.4366	-9.91616		6.64709	25.9085	20.8951	27.3673	17.2425	8.40767	5.58916	14.3546	5.99155	10.2314		17.4366	9.91616
-24.6525	-25.4182	-10.2285	-26.928	-10.5251	-8.591	-7.29782	-19.5419	-5.62178	-8.15568		-7.54888	-11.3632		24.6525	25.4182	10.2285	26.928	10.5251	8.591	7.29782	19.5419	5.62178	8.15568		7.54888	11.3632
-6.5866	-9.36291	-15.909	-7.61727	-13.0853	-8.16546	-5.71084	-14.0483	-6.5942	-7.30118		-8.28126	-7.08676		6.5866	9.36291	15.909	7.61727	13.0853	8.16546	5.71084	14.0483	6.5942	7.30118		8.28126	7.08676
-7.74665	-6.98221	-29.5215	-21.4018	-9.29416	-8.5347	-8.33322	-13.3155	-12.6188	-17.3108		-22.8075	-7.92842		7.74665	6.98221	29.5215	21.4018	9.29416	8.5347	8.33322	13.3155	12.6188	17.3108		22.8075	7.92842
-16.1713	-7.40567	-14.9391	-18.4665	-7.46085	-25.9944	-8.82079	-8.06466	-6.81115	-7.05689		-8.89148	-7.53893		16.1713	7.40567	14.9391	18.4665	7.46085	25.9944	8.82079	8.06466	6.81115	7.05689		8.89148	7.53893
-9.2744	-6.54995	-25.4996	-13.3458	-7.32221	-10.9854	-11.2599	-13.7402	-5.43915	-7.78846		-10.8446	-7.41375		9.2744	6.54995	25.4996	13.3458	7.32221	10.9854	11.2599	13.7402	5.43915	7.78846		10.8446	7.41375
-6.83338	-16.5485	-8.35002	-7.2955	-16.4641	-13.6133	-17.4842	-12.2749	-5.31445	-14.6243		-7.06036	-7.03897		6.83338	16.5485	8.35002	7.2955	16.4641	13.6133	17.4842	12.2749	5.31445	14.6243		7.06036	7.03897
-16.4183	-13.9128	-18.7277	-23.4667	-24.9467	-17.154	-5.15004	-17.0958	-5.55852	-16.3328		-14.6287	-10.5737		16.4183	13.9128	18.7277	23.4667	24.9467	17.154	5.15004	17.0958	5.55852	16.3328		14.6287	10.5737
-8.85041	-6.3376	-11.7229	-11.6726	-10.3389	-10.4417	-5.6383	-13.6162	-6.70079	-7.29867		-7.18236	-16.7831		8.85041	6.3376	11.7229	11.6726	10.3389	10.4417	5.6383	13.6162	6.70079	7.29867		7.18236	16.7831
-8.24014	-8.89995	-8.79582	-15.8087	-7.71	-7.02804	-10.153	-10.1962	-11.5135	-8.39707		-9.37962	-7.8645		8.24014	8.89995	8.79582	15.8087	7.71	7.02804	10.153	10.1962	11.5135	8.39707		9.37962	7.8645
-6.16864	-14.2676	-31.1376	-7.3762	-7.64801	-13.135	-5.14683	-9.28018	-9.92099	-7.54257		-9.98993	-13.2351		6.16864	14.2676	31.1376	7.3762	7.64801	13.135	5.14683	9.28018	9.92099	7.54257		9.98993	13.2351
-12.7617	-8.70453	-18.2081	-9.44525	-7.89156	-14.1739	-5.56686	-15.6839	-8.38636	-10.3502		-7.06015	-7.23506		12.7617	8.70453	18.2081	9.44525	7.89156	14.1739	5.56686	15.6839	8.38636	10.3502		7.06015	7.23506
-12.2739	-6.43537	-12.8995	-9.92996	-11.1185	-22.9636	-33.886	-15.0108	-5.61364	-16.4528		-7.67047	-10.7682		12.2739	6.43537	12.8995	9.92996	11.1185	22.9636	33.886	15.0108	5.61364	16.4528		7.67047	10.7682
-9.95585	-17.482	-9.133	-7.0595	-8.72999	-7.70917	-9.04422	-17.2071	-7.99043	-14.8657		-10.4781	-11.1251		9.95585	17.482	9.133	7.0595	8.72999	7.70917	9.04422	17.2071	7.99043	14.8657		10.4781	11.1251
-6.11186	-8.06624	-17.7394	-13.8821	-7.80531	-10.9455	-5.0152	-21.5403	-15.353	-29.514		-12.6753	-9.89511		6.11186	8.06624	17.7394	13.8821	7.80531	10.9455	5.0152	21.5403	15.353	29.514		12.6753	9.89511
-25.5214	-21.6084	-26.9566	-19.0035	-8.22258	-7.89377	-12.2155	-12.751	-6.11273	-7.17466		-9.62347	-7.45024		25.5214	21.6084	26.9566	19.0035	8.22258	7.89377	12.2155	12.751	6.11273	7.17466		9.62347	7.45024
-7.27205	-8.30088	-10.1727	-10.4517	-9.99086	-13.5705	-16.9755	-12.9337	-5.73551	-21.2115		-9.98965	-11.4774		7.27205	8.30088	10.1727	10.4517	9.99086	13.5705	16.9755	12.9337	5.73551	21.2115		9.98965	11.4774
-11.0567	-9.64314	-11.4572	-8.4979	-8.81747	-8.81023	-8.55202	-31.7324	-5.91838	-8.14972		-32.0844	-16.705		11.0567	9.64314	11.4572	8.4979	8.81747	8.81023	8.55202	31.7324	5.91838	8.14972		32.0844	16.705
-6.296	-9.14431	-10.2426	-15.9994	-16.1899	-7.22524	-12.8205	-55.8386	-6.16227	-7.05108		-18.1683	-7.54927		6.296	9.14431	10.2426	15.9994	16.1899	7.22524	12.8205	55.8386	6.16227	7.05108		18.1683	7.54927
-40.3544	-10.0494	-12.2593	-10.4296	-10.5727	-10.7657	-10.1337	-8.2295	-14.3163	-29.6528		-8.15854	-7.54504		40.3544	10.0494	12.2593	10.4296	10.5727	10.7657	10.1337	8.2295	14.3163	29.6528		8.15854	7.54504
-9.22688	-10.3524	-17.1428	-9.74052	-9.2842	-14.4903	-7.99608	-25.0746	-5.09766	-25.6362		-24.1497	-22.311		9.22688	10.3524	17.1428	9.74052	9.2842	14.4903	7.99608	25.0746	5.09766	25.6362		24.1497	22.311
-13.6833	-12.055	-8.66326	-17.0597	-7.45282	-18.0343	-5.5546	-23.8537	-27.98	-11.8696		-10.2337	-31.3368		13.6833	12.055	8.66326	17.0597	7.45282	18.0343	5.5546	23.8537	27.98	11.8696		10.2337	31.3368
-6.24124	-16.1926	-23.5562	-10.5807	-11.1135	-7.05071	-5.79509	-19.8862	-5.80953	-17.6408		-10.7219	-7.88162		6.24124	16.1926	23.5562	10.5807	11.1135	7.05071	5.79509	19.8862	5.80953	17.6408		10.7219	7.88162
-6.06428	-23.0533	-16.0496	-13.6281	-7.96451	-34.0918	-4.99027	-22.8764	-9.40563	-7.73974		-7.79223	-8.36976		6.06428	23.0533	16.0496	13.6281	7.96451	34.0918	4.99027	22.8764	9.40563	7.73974		7.79223	8.36976
-28.7091	-9.43799	-24.8409	-8.52552	-8.86917	-8.02998	-14.2675	-17.7477	-14.5669	-14.1933		-7.91426	-7.38564		28.7091	9.43799	24.8409	8.52552	8.86917	8.02998	14.2675	17.7477	14.5669	14.1933		7.91426	7.38564
-6.18768	-14.4825	-14.4047	-8.46378	-11.7826	-15.111	-9.31967	-15.0591	-25.1643	-17.9781		-7.79215	-9.81562		6.18768	14.4825	14.4047	8.46378	11.7826	15.111	9.31967	15.0591	25.1643	17.9781		7.79215	9.81562
-9.05767	-6.23895	-8.11852	-8.93734	-7.61213	-8.46	-9.56269	-13.289	-10.3289	-8.05774		-11.3322	-11.7622		9.05767	6.23895	8.11852	8.93734	7.61213	8.46	9.56269	13.289	10.3289	8.05774		11.3322	11.7622
-15.7716	-6.2956	-9.09616	-8.19764	-30.8576	-14.8078	-5.35096	-15.7868	-19.1754	-8.28178		-12.0646	-16.2781		15.7716	6.2956	9.09616	8.19764	30.8576	14.8078	5.35096	15.7868	19.1754	8.28178		12.0646	16.2781
-7.22732	-8.11007	-11.7236	-53.2167	-18.6739	-8.036	-5.22873	-10.232	-8.79804	-7.08263		-14.8722	-12.6105		7.22732	8.11007	11.7236	53.2167	18.6739	8.036	5.22873	10.232	8.79804	7.08263		14.8722	12.6105
-6.06816	-9.19832	-8.55055	-12.3179	-10.909	-9.62301	-15.0536	-8.7668	-6.17049	-14.2781		-7.18173	-7.47952		6.06816	9.19832	8.55055	12.3179	10.909	9.62301	15.0536	8.7668	6.17049	14.2781		7.18173	7.47952
-12.906	-20.669	-10.2621	-9.02118	-7.69272	-28.1814	-5.77284	-41.9671	-17.5214	-7.9212		-7.54778	-11.6268		12.906	20.669	10.2621	9.02118	7.69272	28.1814	5.77284	41.9671	17.5214	7.9212		7.54778	11.6268
-9.4905	-6.4465	-13.3147	-23.1629	-10.7774	-12.7456	-25.6076	-14.4384	-11.722	-13.7345		-10.4774	-10.365		9.4905	6.4465	13.3147	23.1629	10.7774	12.7456	25.6076	14.4384	11.722	13.7345		10.4774	10.365
-6.68388	-10.2254	-10.8136	-9.54855	-10.7703	-7.4977	-11.9925	-9.43179	-11.5712	-9.70679		-13.8954	-16.7027		6.68388	10.2254	10.8136	9.54855	10.7703	7.4977	11.9925	9.43179	11.5712	9.70679		13.8954	16.7027
-15.9027	-28.7056	-15.1541	-36.3414	-13.3921	-7.19257	-5.27692	-11.7509	-8.07908	-9.07718		-17.4354	-13.1619		15.9027	28.7056	15.1541	36.3414	13.3921	7.19257	5.27692	11.7509	8.07908	9.07718		17.4354	13.1619
-11.0209	-11.1196	-19.9776	-22.5768	-20.1982	-12.2617	-5.09301	-25.9099	-5.08106	-7.47099		-9.01251	-7.39803		11.0209	11.1196	19.9776	22.5768	20.1982	12.2617	5.09301	25.9099	5.08106	7.47099		9.01251	7.39803
-11.266	-6.8294	-16.9877	-9.69308	-9.74421	-15.1944	-5.09067	-8.94165	-9.16858	-8.32046		-7.18142	-9.22882		11.266	6.8294	16.9877	9.69308	9.74421	15.1944	5.09067	8.94165	9.16858	8.32046		7.18142	9.22882
-12.0603	-24.8948	-9.00527	-15.7271	-11.8232	-7.75209	-11.8608	-8.69693	-9.51388	-10.8571		-21.0974	-20.4423		12.0603	24.8948	9.00527	15.7271	11.8232	7.75209	11.8608	8.69693	9.51388	10.8571		21.0974	20.4423
-7.60492	-6.15676	-11.9407	-18.101	-17.2495	-13.7956	-12.5868	-8.08607	-10.4861	-16.3243		-7.79165	-7.38051		7.60492	6.15676	11.9407	18.101	17.2495	13.7956	12.5868	8.08607	10.4861	16.3243		7.79165	7.38051
-11.146	-12.2388	-11.3369	-9.36179	-12.5338	-21.6737	-15.3936	-9.72666	-5.29783	-10.0522		-24.2711	-10.6642		11.146	12.2388	11.3369	9.36179	12.5338	21.6737	15.3936	9.72666	5.29783	10.0522		24.2711	10.6642
-17.3727	-8.19763	-15.3661	-9.71861	-12.1658	-16.4947	-9.34918	-23.3978	-5.28328	-7.10493		-11.2096	-9.80793		17.3727	8.19763	15.3661	9.71861	12.1658	16.4947	9.34918	23.3978	5.28328	7.10493		11.2096	9.80793
-23.4162	-8.12963	-8.05733	-11.7254	-10.4841	-8.75406	-9.27449	-10.5193	-5.83249	-21.6493		-9.01224	-7.96896		23.4162	8.12963	8.05733	11.7254	10.4841	8.75406	9.27449	10.5193	5.83249	21.6493		9.01224	7.96896
-13.6509	-17.2126	-11.4147	-15.8065	-11.2119	-7.10657	-5.24297	-8.6236	-5.82797	-9.65036		-9.86672	-7.8409		13.6509	17.2126	11.4147	15.8065	11.2119	7.10657	5.24297	8.6236	5.82797	9.65036		9.86672	7.8409
-11.8822	-16.354	-11.2948	-7.86034	-7.25907	-22.5488	-29.5334	-12.1624	-5.18749	-22.2879		-7.30309	-7.95635		11.8822	16.354	11.2948	7.86034	7.25907	22.5488	29.5334	12.1624	5.18749	22.2879		7.30309	7.95635
-6.26708	-22.6362	-25.4587	-11.2042	-12.7428	-8.20712	-8.34433	-11.0595	-5.24078	-7.01233		-7.79135	-19.1391		6.26708	22.6362	25.4587	11.2042	12.7428	8.20712	8.34433	11.0595	5.24078	7.01233		7.79135	19.1391
-18.2313	-6.27842	-15.3287	-16.0689	-7.66842	-11.6864	-7.24378	-9.71399	-10.287	-10.3209		-8.27959	-8.87309		18.2313	6.27842	15.3287	16.0689	7.66842	11.6864	7.24378	9.71399	10.287	10.3209		8.27959	8.87309
-36.6647	-8.23107	-10.6926	-13.7481	-12.5465	-10.3467	-8.83053	-9.40876	-15.9352	-13.6473		-8.64579	-11.0694		36.6647	8.23107	10.6926	13.7481	12.5465	10.3467	8.83053	9.40876	15.9352	13.6473		8.64579	11.0694
-6.87983	-87.6972	-9.30375	-12.7081	-8.81192	-12.7295	-12.0009	-10.6268	-15.802	-11.7046		-7.91337	-7.40139		6.87983	87.6972	9.30375	12.7081	8.81192	12.7295	12.0009	10.6268	15.802	11.7046		7.91337	7.40139
-7.00194	-11.6464	-29.6903	-7.94675	-7.83503	-9.37263	-10.2287	-17.5845	-7.00681	-8.50508		-17.9231	-10.9221		7.00194	11.6464	29.6903	7.94675	7.83503	9.37263	10.2287	17.5845	7.00681	8.50508		17.9231	10.9221
-10.6035	-12.8664	-9.0044	-23.253	-9.23848	-8.09276	-8.33295	-26.006	-5.23661	-12.7873		-7.42505	-7.01522		10.6035	12.8664	9.0044	23.253	9.23848	8.09276	8.33295	26.006	5.23661	12.7873		7.42505	7.01522
-6.94159	-10.8513	-21.9505	-7.38065	-14.3369	-10.7179	-9.79601	-8.42678	-5.23072	-8.13498		-9.01195	-20.9181		6.94159	10.8513	21.9505	7.38065	14.3369	10.7179	9.79601	8.42678	5.23072	8.13498		9.01195	20.9181
-58.4562	-8.16324	-10.7209	-8.5239	-15.7981	-8.40111	-14.6167	-8.24219	-9.13594	-11.8627		-17.0685	-15.2995		58.4562	8.16324	10.7209	8.5239	15.7981	8.40111	14.6167	8.24219	9.13594	11.8627		17.0685	15.2995
-6.45694	-6.75929	-10.6664	-10.7757	-7.55755	-9.62468	-15.164	-8.05452	-5.65589	-7.59224		-7.91324	-12.8559		6.45694	6.75929	10.6664	10.7757	7.55755	9.62468	15.164	8.05452	5.65589	7.59224		7.91324	12.8559
-7.61818	-8.4069	-30.6287	-7.53394	-7.00799	-7.43076	-6.67538	-10.8618	-9.37759	-25.3461		-20.3644	-9.19066		7.61818	8.4069	30.6287	7.53394	7.00799	7.43076	6.67538	10.8618	9.37759	25.3461		20.3644	9.19066
-9.44953	-6.7585	-12.7463	-12.5295	-9.68533	-7.12562	-9.05347	-10.1292	-5.34646	-10.5835		-7.54686	-7.10962		9.44953	6.7585	12.7463	12.5295	9.68533	7.12562	9.05347	10.1292	5.34646	10.5835		7.54686	7.10962
-6.21518	-16.7065	-14.8233	-7.20699	-13.1008	-8.16646	-5.3913	-16.0483	-8.08993	-7.95341		-14.9931	-12.929		6.21518	16.7065	14.8233	7.20699	13.1008	8.16646	5.3913	16.0483	8.08993	7.95341		14.9931	12.929
-9.08432	-31.9643	-11.9571	-12.2666	-17.4226	-7.06845	-21.6255	-10.3086	-5.52603	-7.07716		-10.5985	-12.9243		9.08432	31.9643	11.9571	12.2666	17.4226	7.06845	21.6255	10.3086	5.52603	7.07716		10.5985	12.9243
-12.1371	-7.06156	-16.9717	-8.96321	-14.8323	-23.4881	-9.53639	-14.5804	-5.22069	-8.57941		-7.91296	-10.5982		12.1371	7.06156	16.9717	8.96321	14.8323	23.4881	9.53639	14.5804	5.22069	8.57941		7.91296	10.5982
-6.03396	-6.32873	-9.86007	-28.4327	-7.60715	-7.19336	-5.68574	-17.629	-5.09852	-7.76852		-7.54675	-14.6237		6.03396	6.32873	9.86007	28.4327	7.60715	7.19336	5.68574	17.629	5.09852	7.76852		7.54675	14.6237
-8.41644	-9.19727	-12.4246	-7.37272	-15.4092	-11.3479	-10.9896	-11.1591	-5.82702	-10.2187		-7.18053	-26.0777		8.41644	9.19727	12.4246	7.37272	15.4092	11.3479	10.9896	11.1591	5.82702	10.2187		7.18053	26.0777
-29.2298	-7.36597	-26.3414	-7.43354	-9.24668	-11.1079	-15.6253	-19.7039	-6.61701	-7.41275		-7.30255	-11.8877		29.2298	7.36597	26.3414	7.43354	9.24668	11.1079	15.6253	19.7039	6.61701	7.41275		7.30255	11.8877
-7.4414	-7.54274	-15.3032	-20.0063	-8.73889	-19.2311	-14.3993	-12.8067	-6.73882	-16.814		-7.66875	-9.92193		7.4414	7.54274	15.3032	20.0063	8.73889	19.2311	14.3993	12.8067	6.73882	16.814		7.66875	9.92193
-51.2058	-13.0327	-17.0762	-8.8966	-12.1333	-8.18641	-8.41761	-23.2419	-9.05393	-10.2254		-17.5564	-12.1145		51.2058	13.0327	17.0762	8.8966	12.1333	8.18641	8.41761	23.2419	9.05393	10.2254		17.5564	12.1145
-17.3971	-12.6645	-8.77732	-33.2465	-11.5764	-10.949	-8.23378	-9.1414	-5.51368	-7.4288		-8.5232	-12.8398		17.3971	12.6645	8.77732	33.2465	11.5764	10.949	8.23378	9.1414	5.51368	7.4288		8.5232	12.8398
-6.71755	-9.97651	-9.10591	-16.452	-23.6602	-8.39226	-7.00712	-20.246	-6.12379	-7.67423		-10.1101	-45.9068		6.71755	9.97651	9.10591	16.452	23.6602	8.39226	7.00712	20.246	6.12379	7.67423		10.1101	45.9068
-8.4296	-7.71751	-17.9607	-15.0157	-9.88572	-12.1769	-9.3826	-38.6169	-6.36209	-8.53916		-25.491	-46.272		8.4296	7.71751	17.9607	15.0157	9.88572	12.1769	9.3826	38.6169	6.36209	8.53916		25.491	46.272
-13.1314	-6.19103	-10.3953	-12.0224	-12.2038	-8.46542	-8.95447	-21.4646	-5.07877	-9.8864		-7.79076	-13.6774		13.1314	6.19103	10.3953	12.0224	12.2038	8.46542	8.95447	21.4646	5.07877	9.8864		7.79076	13.6774
-12.2822	-13.3291	-8.08388	-17.2071	-7.86015	-9.14196	-9.92399	-37.9415	-27.5878	-10.7536		-9.37767	-7.4515		12.2822	13.3291	8.08388	17.2071	7.86015	9.14196	9.92399	37.9415	27.5878	10.7536		9.37767	7.4515
-6.05789	-10.6432	-19.745	-9.51447	-7.20713	-16.7752	-12.4235	-17.9799	-9.45407	-21.252		-8.88934	-7.81755		6.05789	10.6432	19.745	9.51447	7.20713	16.7752	12.4235	17.9799	9.45407	21.252		8.88934	7.81755
-9.78167	-6.00018	-19.3273	-9.97823	-10.9489	-7.01233	-24.0752	-14.4392	-9.94172	-7.61027		-10.9645	-8.77454		9.78167	6.00018	19.3273	9.97823	10.9489	7.01233	24.0752	14.4392	9.94172	7.61027		10.9645	8.77454
-9.05243	-22.2275	-17.9959	-23.8169	-17.0904	-13.849	-5.51768	-22.8009	-23.6076	-7.48901		-11.4528	-9.5066		9.05243	22.2275	17.9959	23.8169	17.0904	13.849	5.51768	22.8009	23.6076	7.48901		11.4528	9.5066
-28.5843	-6.41839	-11.1006	-8.25136	-7.50715	-7.07458	-10.6441	-22.8008	-7.72956	-15.5678		-22.4391	-10.109		28.5843	6.41839	11.1006	8.25136	7.50715	7.07458	10.6441	22.8008	7.72956	15.5678		22.4391	10.109
-20.7116	-21.4317	-14.7666	-16.1843	-11.1871	-12.8735	-9.60043	-8.8841	-28.1756	-13.9842		-15.9694	-13.0378		20.7116	21.4317	14.7666	16.1843	11.1871	12.8735	9.60043	8.8841	28.1756	13.9842		15.9694	13.0378
-8.38291	-10.5659	-21.7316	-13.558	-8.33853	-14.1561	-12.9476	-9.67684	-8.58053	-8.49148		-16.7018	-8.03248		8.38291	10.5659	21.7316	13.558	8.33853	14.1561	12.9476	9.67684	8.58053	8.49148		16.7018	8.03248
-8.26424	-13.7391	-10.0746	-10.7969	-11.1423	-8.12444	-29.7921	-10.4694	-5.63772	-8.50693		-15.8472	-11.9378		8.26424	13.7391	10.0746	10.7969	11.1423	8.12444	29.7921	10.4694	5.63772	8.50693		15.8472	11.9378
-8.81365	-14.9495	-8.99432	-9.62825	-12.5598	-21.0094	-5.4999	-25.2396	-9.31814	-11.8207		-8.15673	-7.29876		8.81365	14.9495	8.99432	9.62825	12.5598	21.0094	5.4999	25.2396	9.31814	11.8207		8.15673	7.29876
-11.134	-7.01343	-18.1538	-14.2035	-14.429	-10.6407	-17.2795	-9.18669	-6.44209	-9.50856		-9.01118	-7.17602		11.134	7.01343	18.1538	14.2035	14.429	10.6407	17.2795	9.18669	6.44209	9.50856		9.01118	7.17602
-14.2511	-6.33943	-11.2631	-13.2263	-11.9799	-14.2564	-5.13297	-14.9801	-7.72272	-8.78598		-11.2084	-18.6296		14.2511	6.33943	11.2631	13.2263	11.9799	14.2564	5.13297	14.9801	7.72272	8.78598		11.2084	18.6296
-6.07242	-12.2576	-8.70189	-71.7944	-13.869	-20.1827	-5.07098	-28.1619	-13.0217	-11.3514		-15.847	-8.59506		6.07242	12.2576	8.70189	71.7944	13.869	20.1827	5.07098	28.1619	13.0217	11.3514		15.847	8.59506
-6.25628	-31.7252	-12.3052	-22.1044	-7.44533	-9.46108	-11.4124	-16.8092	-5.01589	-14.5286		-15.7249	-26.2881		6.25628	31.7252	12.3052	22.1044	7.44533	9.46108	11.4124	16.8092	5.01589	14.5286		15.7249	26.2881
-6.68636	-21.4696	-14.5039	-11.5916	-11.756	-8.37024	-6.39794	-13.4491	-27.2309	-10.6297		-9.86546	-12.7365		6.68636	21.4696	14.5039	11.5916	11.756	8.37024	6.39794	13.4491	27.2309	10.6297		9.86546	12.7365
-24.3872	-18.2299	-45.3392	-8.40532	-29.8446	-7.02749	-15.6713	-13.1438	-17.3347	-12.3578		-12.4289	-7.73093		24.3872	18.2299	45.3392	8.40532	29.8446	7.02749	15.6713	13.1438	17.3347	12.3578		12.4289	7.73093
-13.28	-16.6336	-8.35269	-30.1216	-10.7762	-9.34891	-4.99	-22.9699	-5.30657	-10.1817		-19.631	-9.4163		13.28	16.6336	8.35269	30.1216	10.7762	9.34891	4.99	22.9699	5.30657	10.1817		19.631	9.4163
-15.5396	-12.2963	-12.4432	-19.439	-8.02854	-7.60262	-7.3697	-24.373	-5.36591	-7.01113		-7.42393	-11.6091		15.5396	12.2963	12.4432	19.439	8.02854	7.60262	7.3697	24.373	5.36591	7.01113		7.42393	11.6091
-6.93457	-6.49683	-9.14755	-10.3322	-14.4888	-8.64153	-7.61104	-10.7613	-5.05165	-9.57888		-9.37694	-18.4425		6.93457	6.49683	9.14755	10.3322	14.4888	8.64153	7.61104	10.7613	5.05165	9.57888		9.37694	18.4425
-6.5689	-17.9094	-23.187	-32.4724	-13.0135	-11.4598	-6.26062	-21.868	-5.11233	-7.0177		-7.42381	-7.55918		6.5689	17.9094	23.187	32.4724	13.0135	11.4598	6.26062	21.868	5.11233	7.0177		7.42381	7.55918
-7.37034	-13.9409	-8.42868	-41.2604	-10.983	-22.8169	-10.7771	-9.90506	-8.71235	-18.2536		-7.3017	-8.53112		7.37034	13.9409	8.42868	41.2604	10.983	22.8169	10.7771	9.90506	8.71235	18.2536		7.3017	8.53112
-17.0752	-10.0331	-12.0324	-9.02251	-12.2164	-22.2154	-8.39041	-8.31799	-5.41612	-15.6928		-12.5507	-10.8498		17.0752	10.0331	12.0324	9.02251	12.2164	22.2154	8.39041	8.31799	5.41612	15.6928		12.5507	10.8498
-29.3467	-7.2787	-22.8413	-14.5633	-7.50965	-16.1154	-20.2309	-13.5039	-10.3596	-7.64708		-15.9686	-9.98313		29.3467	7.2787	22.8413	14.5633	7.50965	16.1154	20.2309	13.5039	10.3596	7.64708		15.9686	9.98313
-6.03353	-14.8461	-9.35406	-9.82966	-10.4717	-10.6841	-8.08176	-14.3577	-5.10786	-17.5349		-16.8231	-8.25742		6.03353	14.8461	9.35406	9.82966	10.4717	10.6841	8.08176	14.3577	5.10786	17.5349		16.8231	8.25742
-7.19323	-6.41822	-18.8776	-14.0978	-7.04683	-9.3459	-5.21306	-29.4317	-8.80895	-13.385		-22.9266	-9.72058		7.19323	6.41822	18.8776	14.0978	7.04683	9.3459	5.21306	29.4317	8.80895	13.385		22.9266	9.72058
-15.9829	-13.123	-10.8834	-15.6099	-7.83594	-9.10896	-11.7403	-8.67854	-5.31965	-7.89475		-11.0857	-7.39962		15.9829	13.123	10.8834	15.6099	7.83594	9.10896	11.7403	8.67854	5.31965	7.89475		11.0857	7.39962
-23.4303	-6.16482	-13.88	-12.2359	-8.9293	-7.09923	-10.2751	-19.5377	-10.369	-8.01885		-14.3816	-19.3274		23.4303	6.16482	13.88	12.2359	8.9293	7.09923	10.2751	19.5377	10.369	8.01885		14.3816	19.3274
-38.6285	-6.15658	-14.6752	-28.8346	-9.4087	-9.05666	-11.7279	-8.1208	-10.6553	-13.2733		-10.1091	-8.08596		38.6285	6.15658	14.6752	28.8346	9.4087	9.05666	11.7279	8.1208	10.6553	13.2733		10.1091	8.08596
-13.9714	-6.81638	-10.1593	-22.4843	-20.4956	-7.59186	-6.35322	-9.28021	-5.10088	-7.5371		-7.78974	-11.5948		13.9714	6.81638	10.1593	22.4843	20.4956	7.59186	6.35322	9.28021	5.10088	7.5371		7.78974	11.5948
-6.10165	-29.0328	-8.51344	-13.8734	-7.18891	-8.01927	-15.8119	-18.3734	-12.8462	-7.04905		-7.9118	-17.0705		6.10165	29.0328	8.51344	13.8734	7.18891	8.01927	15.8119	18.3734	12.8462	7.04905		7.9118	17.0705
-10.1916	-22.1346	-8.21267	-7.58404	-7.11986	-10.4013	-6.04363	-21.119	-5.88002	-9.61323		-8.76626	-7.05404		10.1916	22.1346	8.21267	7.58404	7.11986	10.4013	6.04363	21.119	5.88002	9.61323		8.76626	7.05404
-6.22688	-22.9854	-11.5699	-7.64413	-7.21987	-10.9531	-5.06557	-9.46036	-6.85611	-8.759		-7.66762	-12.6592		6.22688	22.9854	11.5699	7.64413	7.21987	10.9531	5.06557	9.46036	6.85611	8.759		7.66762	12.6592
-8.42495	-7.05356	-10.4143	-15.0896	-12.7964	-7.29155	-7.13893	-18.4321	-5.08018	-10.3492		-19.1422	-13.9909		8.42495	7.05356	10.4143	15.0896	12.7964	7.29155	7.13893	18.4321	5.08018	10.3492		19.1422	13.9909
-18.253	-7.5403	-18.9616	-8.98438	-8.84693	-7.65782	-10.6125	-9.2767	-17.1641	-12.7909		-7.91172	-7.75416		18.253	7.5403	18.9616	8.98438	8.84693	7.65782	10.6125	9.2767	17.1641	12.7909		7.91172	7.75416
-6.04747	-15.4738	-15.9139	-21.1845	-16.1569	-8.94098	-16.4088	-15.4972	-13.619	-11.2152		-11.818	-8.24224		6.04747	15.4738	15.9139	21.1845	16.1569	8.94098	16.4088	15.4972	13.619	11.2152		11.818	8.24224
-6.59722	-10.8945	-10.2442	-12.4551	-7.54272	-7.6622	-14.3271	-25.3824	-5.01226	-9.0197		-10.109	-7.99668		6.59722	10.8945	10.2442	12.4551	7.54272	7.6622	14.3271	25.3824	5.01226	9.0197		10.109	7.99668
-6.41489	-21.5754	-10.4307	-20.8141	-11.5266	-10.7164	-6.14766	-14.8826	-7.69722	-7.4348		-11.2076	-14.8127		6.41489	21.5754	10.4307	20.8141	11.5266	10.7164	6.14766	14.8826	7.69722	7.4348		11.2076	14.8127
-27.3527	-14.3724	-8.66477	-13.4264	-7.12654	-7.92234	-10.4728	-33.2507	-5.07171	-9.63281		-8.03375	-7.96219		27.3527	14.3724	8.66477	13.4264	7.12654	7.92234	10.4728	33.2507	5.07171	9.63281		8.03375	7.96219
-9.41234	-6.49843	-9.22025	-9.45662	-7.54971	-8.90858		-25.4971	-7.44849	-8.41448		-20.607	-11.3737		9.41234	6.49843	9.22025	9.45662	7.54971	8.90858		25.4971	7.44849	8.41448		20.607	11.3737
-7.90203	-7.10843	-8.50386	-11.2715	-7.28103	-10.7414		-8.04055	-7.13997	-7.43803		-8.03371	-13.8149		7.90203	7.10843	8.50386	11.2715	7.28103	10.7414		8.04055	7.13997	7.43803		8.03371	13.8149
-48.1421	-6.55169	-13.8784	-27.8713	-7.11701	-23.1952		-9.13911	-16.4745	-7.07269		-26.7104	-10.0169		48.1421	6.55169	13.8784	27.8713	7.11701	23.1952		9.13911	16.4745	7.07269		26.7104	10.0169
-76.526	-6.3074	-10.0951	-17.5534	-10.1071	-7.14657		-13.0446	-5.18263	-7.43898		-22.56	-12.5568		76.526	6.3074	10.0951	17.5534	10.1071	7.14657		13.0446	5.18263	7.43898		22.56	12.5568
-24.4633	-6.73176	-10.0975	-8.13911	-9.91898	-18.5126		-14.0819	-6.46425	-8.45834		-11.3295	-10.7022		24.4633	6.73176	10.0975	8.13911	9.91898	18.5126		14.0819	6.46425	8.45834		11.3295	10.7022
-11.8937	-9.22172	-12.2968	-14.7889	-9.71112	-12.471		-21.0992	-8.96	-10.5423		-14.0151	-8.37806		11.8937	9.22172	12.2968	14.7889	9.71112	12.471		21.0992	8.96	10.5423		14.0151	8.37806
-6.09671	-10.4814	-11.3826	-41.6792	-14.3462	-9.85075		-13.5305	-9.3804	-10.4352		-21.4613	-13.7302		6.09671	10.4814	11.3826	41.6792	14.3462	9.85075		13.5305	9.3804	10.4352		21.4613	13.7302
-8.3561	-18.1028	-13.4711	-9.26112	-11.33	-7.16805		-12.3649	-5.22055	-7.63883		-12.4281	-14.8253		8.3561	18.1028	13.4711	9.26112	11.33	7.16805		12.3649	5.22055	7.63883		12.4281	14.8253
-18.2498	-19.1315	-15.9149	-16.6422	-8.82626	-11.5682		-17.0636	-5.83054	-10.0855		-17.6771	-17.9895		18.2498	19.1315	15.9149	16.6422	8.82626	11.5682		17.0636	5.83054	10.0855		17.6771	17.9895
-31.7394	-13.4519	-8.9603	-11.993	-9.61333	-12.0593		-20.7856	-5.76001	-10.3765		-7.30108	-9.43827		31.7394	13.4519	8.9603	11.993	9.61333	12.0593		20.7856	5.76001	10.3765		7.30108	9.43827
-8.05901	-6.55472	-16.0421	-7.04007		-10.2988		-20.9072	-8.73769	-8.17961		-10.4749	-7.35036		8.05901	6.55472	16.0421	7.04007		10.2988		20.9072	8.73769	8.17961		10.4749	7.35036
-10.3235	-10.826	-9.26992	-9.23541		-16.4648		-10.531	-5.31876	-14.9114		-10.5969	-7.57715		10.3235	10.826	9.26992	9.23541		16.4648		10.531	5.31876	14.9114		10.5969	7.57715
-6.11478	-7.40428	-13.564	-11.1743		-9.95543		-8.21123	-9.71313	-12.3558		-10.2307	-11.1005		6.11478	7.40428	13.564	11.1743		9.95543		8.21123	9.71313	12.3558		10.2307	11.1005
-12.8904	-26.322	-13.019	-29.5942		-20.8222		-12.9106	-9.27984	-8.95693		-16.9445	-29.401		12.8904	26.322	13.019	29.5942		20.8222		12.9106	9.27984	8.95693		16.9445	29.401
-7.154	-13.5508	-15.7673	-12.3131		-13.8701		-10.649	-6.94736	-8.12125		-9.74229	-12.5527		7.154	13.5508	15.7673	12.3131		13.8701		10.649	6.94736	8.12125		9.74229	12.5527
-14.6614	-6.0349	-8.32134	-7.06366		-8.01136		-9.30559	-5.96271	-8.49954		-11.0851	-12.429		14.6614	6.0349	8.32134	7.06366		8.01136		9.30559	5.96271	8.49954		11.0851	12.429
-6.72822	-10.3666	-54.7327	-16.8835		-8.56908		-13.147	-5.96224	-22.2975		-8.64364	-9.37247		6.72822	10.3666	54.7327	16.8835		8.56908		13.147	5.96224	22.2975		8.64364	9.37247
-7.34526	-23.4885	-13.6657	-16.6325		-10.538		-19.921	-5.41163	-12.0445		-8.64351	-8.02004		7.34526	23.4885	13.6657	16.6325		10.538		19.921	5.41163	12.0445		8.64351	8.02004
-6.06357	-6.11645	-14.7752	-11.104		-8.82986		-9.90985	-20.1181	-11.5583		-8.64346	-12.5282		6.06357	6.11645	14.7752	11.104		8.82986		9.90985	20.1181	11.5583		8.64346	12.5282
-9.17733	-19.0519	-16.3039	-15.6335		-11.0901		-8.9911	-5.09868	-13.513		-11.6952	-9.19119		9.17733	19.0519	16.3039	15.6335		11.0901		8.9911	5.09868	13.513		11.6952	9.19119
-8.07911	-7.39307	-19.4837	-11.6638		-11.398		-12.4056	-5.03754	-26.8232		-49.6591	-13.0681		8.07911	7.39307	19.4837	11.6638		11.398		12.4056	5.03754	26.8232		49.6591	13.0681
-6.43332	-6.96224	-17.5959	-9.58714		-10.5461		-15.7605	-6.62125	-11.0816		-25.8553	-8.90111		6.43332	6.96224	17.5959	9.58714		10.5461		15.7605	6.62125	11.0816		25.8553	8.90111
-8.02077	-11.9009	-14.7894	-33.5688		-7.25695		-29.7368	-16.2171	-8.68336		-7.42267	-8.65226		8.02077	11.9009	14.7894	33.5688		7.25695		29.7368	16.2171	8.68336		7.42267	8.65226
-14.9189	-8.35391	-18.4714	-32.1556		-8.42122		-9.10666	-19.5644	-25.9055		-9.86396	-9.97898		14.9189	8.35391	18.4714	32.1556		8.42122		9.10666	19.5644	25.9055		9.86396	9.97898
-7.71733	-17.7341	-16.0917	-12.1339		-12.4622		-19.1774	-15.7647	-10.5325		-9.3756	-14.9753		7.71733	17.7341	16.0917	12.1339		12.4622		19.1774	15.7647	10.5325		9.3756	14.9753
-9.06138	-11.3848	-15.7299	-8.04788		-7.53002		-39.7455	-6.66876	-7.97677		-16.5777	-13.6302		9.06138	11.3848	15.7299	8.04788		7.53002		39.7455	6.66876	7.97677		16.5777	13.6302
-6.37742	-13.332	-13.6565	-7.6192		-7.04976		-8.24798	-5.41771	-8.58767		-7.5445	-7.4008		6.37742	13.332	13.6565	7.6192		7.04976		8.24798	5.41771	8.58767		7.5445	7.4008
-17.8525	-7.22346	-12.8062	-8.28247		-10.2285		-19.0505	-9.48209	-7.74886		-7.78864	-8.71662		17.8525	7.22346	12.8062	8.28247		10.2285		19.0505	9.48209	7.74886		7.78864	8.71662
-12.361	-20.5263	-35.5124	-11.1471		-9.13022		-9.16254	-9.59451	-7.8711		-7.42242	-11.5142		12.361	20.5263	35.5124	11.1471		9.13022		9.16254	9.59451	7.8711		7.42242	11.5142
-8.88232	-35.9058	-23.7942	-38.6711		-10.9028		-30.8287	-20.5805	-15.6933		-8.03276	-11.757		8.88232	35.9058	23.7942	38.6711		10.9028		30.8287	20.5805	15.6933		8.03276	11.757
-8.88285	-6.05905	-24.7104	-10.9333		-7.36375		-9.52133	-15.1387	-7.27425		-8.27688	-10.8865		8.88285	6.05905	24.7104	10.9333		7.36375		9.52133	15.1387	7.27425		8.27688	10.8865
-11.6908	-6.12003	-11.7114	-14.4087		-26.1103		-13.3654	-5.17935	-7.15226		-7.91064	-16.2431		11.6908	6.12003	11.7114	14.4087		26.1103		13.3654	5.17935	7.15226		7.91064	16.2431
-11.022	-6.48588	-11.6511	-16.2885		-9.94614		-13.3646	-5.47924	-12.1667		-12.5493	-11.4679		11.022	6.48588	11.6511	16.2885		9.94614		13.3646	5.47924	12.1667		12.5493	11.4679
-7.1819	-22.5879	-13.3682	-63.0979		-10.1982		-16.965	-5.78043	-19.8693		-8.39886	-15.0002		7.1819	22.5879	13.3682	63.0979		10.1982		16.965	5.78043	19.8693		8.39886	15.0002
-7.91747	-8.23945	-10.3198	-8.16538		-7.20943		-43.3309	-17.6806	-10.7279		-7.54434	-18.4016		7.91747	8.23945	10.3198	8.16538		7.20943		43.3309	17.6806	10.7279		7.54434	18.4016
-8.4061		-12.091	-8.27836		-7.08797		-15.0095	-6.1433	-9.15191		-13.8919	-8.8782		8.4061		12.091	8.27836		7.08797		15.0095	6.1433	9.15191		13.8919	8.8782
-9.81233		-16.792	-11.1441		-8.49191		-24.8358	-6.80865	-7.20357		-15.9671	-13.2693		9.81233		16.792	11.1441		8.49191		24.8358	6.80865	7.20357		15.9671	13.2693
-6.58131	-12.2746	-8.08399	-22.859		-7.39335		-9.08513	-5.16058	-11.2417		-9.74151	-7.04347		6.58131	12.2746	8.08399	22.859		7.39335		9.08513	5.16058	11.2417		9.74151	7.04347
-12.5025		-23.9566	-22.6694		-8.06493		-14.6379	-7.65904	-7.22848		-7.3	-10.217		12.5025		23.9566	22.6694		8.06493		14.6379	7.65904	7.22848		7.3	10.217
-7.00987		-9.69048	-8.23617		-12.0934		-24.7075	-5.52224	-7.22859		-7.6662	-10.8269		7.00987		9.69048	8.23617		12.0934		24.7075	5.52224	7.22859		7.6662	10.8269
-10.6119		-10.4262	-12.8645		-7.02765		-10.0571	-15.5107	-9.30618		-12.6711	-11.2932		10.6119		10.4262	12.8645		7.02765		10.0571	15.5107	9.30618		12.6711	11.2932
-6.52318		-8.11504	-7.00484		-8.43173		-10.1779	-5.62277	-15.7764		-14.1358	-11.8975		6.52318		8.11504	7.00484		8.43173		10.1779	5.62277	15.7764		14.1358	11.8975
-16.106		-21.4225	-8.83981		-9.4084		-9.74779	-18.8022	-7.47608		-7.17782	-9.80616		16.106		21.4225	8.83981		9.4084		9.74779	18.8022	7.47608		7.17782	9.80616
-20.7467		-10.8869	-15.6037		-8.31021		-15.8493	-6.89962	-12.9807		-13.1592	-16.0281		20.7467		10.8869	15.6037		8.31021		15.8493	6.89962	12.9807		13.1592	16.0281
-6.28178		-9.12012	-11.1288		-15.0858		-8.70806	-17.2073	-9.56392		-14.624	-8.32873		6.28178		9.12012	11.1288		15.0858		8.70806	17.2073	9.56392		14.624	8.32873
-12.874		-24.521	-8.8644		-8.12866		-15.2976	-6.21117	-15.1905		-13.6474	-10.6376		12.874		24.521	8.8644		8.12866		15.2976	6.21117	15.1905		13.6474	10.6376
-6.7125		-25.3833	-17.7026		-8.00722		-9.74328	-5.11213	-20.9479		-19.7509	-10.3921		6.7125		25.3833	17.7026		8.00722		9.74328	5.11213	20.9479		19.7509	10.3921
-23.8638		-16.7788	-18.0679		-8.00797		-16.0833	-5.53466	-9.6068		-8.39831	-19.5444		23.8638		16.7788	18.0679		8.00797		16.0833	5.53466	9.6068		8.39831	19.5444
-6.04654		-10.1456	-22.3369		-7.5809		-10.0366	-9.54438	-8.15247		-10.2294	-7.82533		6.04654		10.1456	22.3369		7.5809		10.0366	9.54438	8.15247		10.2294	7.82533
-18.4433		-10.0249	-21.9697		-8.00821			-5.02143	-9.62461		-9.37479	-13.019		18.4433		10.0249	21.9697		8.00821			5.02143	9.62461		9.37479	13.019
-7.27652		-16.2702	-8.35664		-9.47325			-6.24202	-8.66255		-24.3894	-22.5208		7.27652		16.2702	8.35664		9.47325			6.24202	8.66255		24.3894	22.5208
-6.1784		-13.7682	-20.1914		-7.64244			-17.2254	-7.07851		-12.6706	-10.9191		6.1784		13.7682	20.1914		7.64244			17.2254	7.07851		12.6706	10.9191
-6.669		-8.46294	-19.5547		-7.21539			-26.2566	-8.54548		-35.1314	-13.4552		6.669		8.46294	19.5547		7.21539			26.2566	8.54548		35.1314	13.4552
-7.82911		-21.4028	-11.9844		-8.98551			-5.19897	-7.96948		-9.00834	-7.2132		7.82911		21.4028	11.9844		8.98551			5.19897	7.96948		9.00834	7.2132
-10.3344		-17.1934	-14.4807		-7.27661			-5.07675	-11.7657		-8.15382	-8.43372		10.3344		17.1934	14.4807		7.27661			5.07675	11.7657		8.15382	8.43372
-22.909		-9.45963	-26.8027		-9.10783			-5.37819	-9.20514		-11.2055	-7.5492		22.909		9.45963	26.8027		9.10783			5.37819	9.20514		11.2055	7.5492
-12.1709		-8.8841	-19.1004		-8.37561			-7.62406	-7.00807		-8.76406	-11.4534		12.1709		8.8841	19.1004		8.37561			7.62406	7.00807		8.76406	11.4534
-21.1464		-12.9737	-41.3704		-7.21611			-5.16581	-7.49838		-8.15371	-7.30279		21.1464		12.9737	41.3704		7.21611			5.16581	7.49838		8.15371	7.30279
-6.01003		-17.7361	-10.6002		-7.09448			-20.4195	-13.6135		-7.2992	-7.05757		6.01003		17.7361	10.6002		7.09448			20.4195	13.6135		7.2992	7.05757
-9.49127		-10.7942	-7.5339		-7.46071			-6.18207	-17.7641		-16.8207	-8.26798		9.49127		10.7942	7.5339		7.46071			6.18207	17.7641		16.8207	8.26798
-6.31792		-29.7256	-10.6745		-8.25438			-5.32713	-10.4525		-10.3509	-9.23652		6.31792		29.7256	10.6745		8.25438			5.32713	10.4525		10.3509	9.23652
-18.344		-10.344	-7.61625		-7.03375			-5.00541	-12.5413		-16.4544	-12.5256		18.344		10.344	7.61625		7.03375			5.00541	12.5413		16.4544	12.5256
-7.2421		-8.20879	-8.10383		-9.109			-5.05151	-7.05588		-9.49642	-9.34244		7.2421		8.20879	8.10383		9.109			5.05151	7.05588		9.49642	9.34244
-11.643		-9.79646	-7.29303		-7.34017			-8.73273	-8.5209		-16.5764	-18.0039		11.643		9.79646	7.29303		7.34017			8.73273	8.5209		16.5764	18.0039
-17.9378		-17.551	-82.9758		-7.82868			-31.0704	-11.9394		-8.51967	-8.83938		17.9378		17.551	82.9758		7.82868			31.0704	11.9394		8.51967	8.83938
-10.071		-17.0633	-7.8974		-7.40263			-5.0072	-7.54513		-8.76373	-12.2534		10.071		17.0633	7.8974		7.40263			5.0072	7.54513		8.76373	12.2534
-6.04687		-9.49822	-7.52753		-7.28074			-5.9172	-9.62631		-8.51957			6.04687		9.49822	7.52753		7.28074			5.9172	9.62631		8.51957
-8.0144		-8.52659	-8.9729		-7.89117			-30.208	-9.14621		-14.3789			8.0144		8.52659	8.9729		7.89117			30.208	9.14621		14.3789
-9.48218		-13.6055	-14.5669		-8.44064			-16.4738	-7.09468		-11.6934			9.48218		13.6055	14.5669		8.44064			16.4738	7.09468		11.6934
-21.7523		-25.0211	-14.181		-8.31866			-25.1975	-10.519		-7.66503			21.7523		25.0211	14.181		8.31866			25.1975	10.519		7.66503
-7.35317		-35.8314	-13.752		-17.0558			-6.21294	-9.78905		-10.1064			7.35317		35.8314	13.752		17.0558			6.21294	9.78905		10.1064
-22.2498		-9.83809	-20.4042		-7.71923			-5.11412	-14.3147		-7.66495			22.2498		9.83809	20.4042		7.71923			5.11412	14.3147		7.66495
-7.54096		-11.9187	-9.27961		-7.60027			-5.29704	-17.1401		-7.29872			7.54096		11.9187	9.27961		7.60027			5.29704	17.1401		7.29872
-8.02929		-9.6027	-19.5889		-12.6671			-5.53848	-15.8161		-9.49595			8.02929		9.6027	19.5889		12.6671			5.53848	15.8161		9.49595
-7.9073		-12.2981	-7.74247		-7.54518			-6.26905	-7.40921		-12.6698			7.9073		12.2981	7.74247		7.54518			6.26905	7.40921		12.6698
-6.38148		-19.8131	-21.5202		-7.18317			-21.1484	-7.53139		-12.1815			6.38148		19.8131	21.5202		7.18317			21.1484	7.53139		12.1815
-8.21257		-27.2669	-7.28035		-9.07825			-5.03487	-8.38613		-10.1062			8.21257		27.2669	7.28035		9.07825			5.03487	8.38613		10.1062
-10.1055		-16.4673	-25.6513		-8.35696			-6.06978	-8.26422		-7.1765			10.1055		16.4673	25.6513		8.35696			6.06978	8.26422		7.1765
-14.0734		-17.2831	-7.76319		-11.043			-15.4626	-7.05764		-10.8386			14.0734		17.2831	7.76319		11.043			15.4626	7.05764		10.8386
-7.78805		-9.60506	-16.7249		-9.51851			-5.45256			-9.00754			7.78805		9.60506	16.7249		9.51851			5.45256			9.00754
-16.2771		-16.9301	-12.4887		-14.7686			-5.08626			-26.2194			16.2771		16.9301	12.4887		14.7686			5.08626			26.2194
-8.89273		-8.81305	-16.6883		-8.66596			-5.14571			-9.00746			8.89273		8.81305	16.6883		8.66596			5.14571			9.00746
-6.26927		-9.97765	-19.7337		-11.111			-7.09736			-8.76332			6.26927		9.97765	19.7337		11.111			7.09736			8.76332
-8.8942		-8.21172	-20.569		-9.96487			-5.75422			-11.9371			8.8942		8.21172	20.569		9.96487			5.75422			11.9371
-9.74989		-13.7138	-27.8847		-16.6222			-8.134			-7.42052			9.74989		13.7138	27.8847		16.6222			8.134			7.42052
-16.8335		-12.5651	-9.47869		-21.7595			-19.8506			-32.4449			16.8335		12.5651	9.47869		21.7595			19.8506			32.4449
-13.7248		-19.4018	-7.15832		-8.39585			-5.44257			-7.42033			13.7248		19.4018	7.15832		8.39585			5.44257			7.42033
-16.0448		-8.72294	-11.3601		-16.2261			-10.6191			-30.2475			16.0448		8.72294	11.3601		16.2261			10.6191			30.2475
-6.82977		-16.7806	-8.00172		-10.123			-5.42667			-16.6977			6.82977		16.7806	8.00172		10.123			5.42667			16.6977
-10.9816		-32.4722	-16.6651		-11.2363			-17.6201			-9.25134			10.9816		32.4722	16.6651		11.2363			17.6201			9.25134
-10.6163		-8.73307	-9.33118		-7.94601			-6.37425			-7.05404			10.6163		8.73307	9.33118		7.94601			6.37425			7.05404
-11.4103		-11.2432	-11.527		-7.52012			-6.55706			-8.39675			11.4103		11.2432	11.527		7.52012			6.55706			8.39675
-8.118		-20.4086	-14.2731		-10.089			-5.51928			-8.1526			8.118		20.4086	14.2731		10.089			5.51928			8.1526
-9.34159		-23.0951	-7.0623		-11.0672			-6.31			-15.4768			9.34159		23.0951	7.0623		11.0672			6.31			15.4768
-6.29204		-9.85608	-10.2347		-8.15334			-6.55387			-8.39664			6.29204		9.85608	10.2347		8.15334			6.55387			8.39664
-36.7505		-12.0626	-7.24365		-11.2753			-5.57719			-33.7872			36.7505		12.0626	7.24365		11.2753			5.57719			33.7872
-6.53989		-8.58648	-9.01075		-10.4895			-5.57614			-7.90813			6.53989		8.58648	9.01075		10.4895			5.57614			7.90813
-13.4399		-9.76369	-7.30063		-7.08811			-6.48916			-12.913			13.4399		9.76369	7.30063		7.08811			6.48916			12.913
-10.0237		-11.9006	-9.18146		-8.6214			-5.63397			-17.9179			10.0237		11.9006	9.18146		8.6214			5.63397			17.9179
-7.223		-8.54528	-24.1276		-9.47682			-5.51			-10.5936			7.223		8.54528	24.1276		9.47682			5.51			10.5936
-9.48313		-17.5831	-18.0803		-11.5575			-15.083			-8.51837			9.48313		17.5831	18.0803		11.5575			15.083			8.51837
-6.9873		-21.3764	-9.7025		-12.6671			-5.74368			-11.0818			6.9873		21.3764	9.7025		12.6671			5.74368			11.0818
-10.2229		-16.9276	-18.4842		-13.7675			-5.0048			-8.27398			10.2229		16.9276	18.4842		13.7675			5.0048			8.27398
-20.8441		-11.9869	-11.879		-11.8262			-31.0575			-20.481			20.8441		11.9869	11.879		11.8262			31.0575			20.481
-8.88314		-24.5011	-9.986		-15.8604			-5.36128			-15.476			8.88314		24.5011	9.986		15.8604			5.36128			15.476
-9.37504		-18.119	-17.6142		-8.17121			-5.97146			-8.15181			9.37504		18.119	17.6142		8.17121			5.97146			8.15181
-7.54779		-26.4236	-13.8294					-9.14224			-19.3822			7.54779		26.4236	13.8294					9.14224			19.3822
-8.59301		-9.823	-10.0373					-5.35616			-25.974			8.59301		9.823	10.0373					5.35616			25.974
-8.17424		-10.1536	-7.10123					-16.827			-7.2971			8.17424		10.1536	7.10123					16.827			7.2971
-14.8892		-13.8332	-12.8365					-5.04405			-22.1896			14.8892		13.8332	12.8365					5.04405			22.1896
-14.157		-20.3676	-7.28146					-5.34787			-8.6398			14.157		20.3676	7.28146					5.34787			8.6398
-22.2761		-13.5369	-13.0141					-5.1635			-10.8371			22.2761		13.5369	13.0141					5.1635			10.8371
-10.8679		-9.38711	-7.45856					-6.36327			-9.00597			10.8679		9.38711	7.45856					6.36327			9.00597
-8.61019		-17.4547	-11.6028					-13.0702			-15.964			8.61019		17.4547	11.6028					13.0702			15.964
-8.13474		-18.4929	-13.0547					-5.25649			-8.88385			8.13474		18.4929	13.0547					5.25649			8.88385
-10.0886		-11.17	-10.7312					-5.50049			-10.1045			10.0886		11.17	10.7312					5.50049			10.1045
-17.6024		-19.4717	-8.18467					-10.1359			-15.7197			17.6024		19.4717	8.18467					10.1359			15.7197
-12.0504		-27.5909	-8.66622					-16.4831			-7.54103			12.0504		27.5909	8.66622					16.4831			7.54103
-6.55999		-8.1227	-11.8906					-6.47305			-8.27345			6.55999		8.1227	11.8906					6.47305			8.27345
-6.26823		-15.6936	-20.8984					-7.69251			-7.17477			6.26823		15.6936	20.8984					7.69251			7.17477
-15.732		-16.7947	-7.69668					-5.1872			-7.29676			15.732		16.7947	7.69668					5.1872			7.29676
-11.7703		-8.62062	-38.641					-5.18327			-16.0858			11.7703		8.62062	38.641					5.18327			16.0858
-67.5576		-21.3171	-17.5816					-8.35575			-9.24985			67.5576		21.3171	17.5816					8.35575			9.24985
-16.0515		-24.2484	-13.8434					-5.17867			-8.27325			16.0515		24.2484	13.8434					5.17867			8.27325
-6.28728		-14.1274	-7.85933					-5.72779			-11.447			6.28728		14.1274	7.85933					5.72779			11.447
-8.12392		-23.2265	-11.3235					-13.1705			-9.37176			8.12392		23.2265	11.3235					13.1705			9.37176
-12.2819		-14.6763	-10.3924					-5.34644			-15.8415			12.2819		14.6763	10.3924					5.34644			15.8415
-20.9551		-16.8135	-8.86281					-5.28308			-18.2828			20.9551		16.8135	8.86281					5.28308			18.2828
-6.20449		-15.5562	-32.4161					-13.1485			-8.02889			6.20449		15.5562	32.4161					13.1485			8.02889
-12.2555		-8.62883	-15.139					-5.09083			-8.51711			12.2555		8.62883	15.139					5.09083			8.51711
-8.59365		-10.7658	-11.5776					-5.02618			-7.41847			8.59365		10.7658	11.5776					5.02618			7.41847
-6.76356		-12.6595	-14.3091								-9.37141			6.76356		12.6595	14.3091								9.37141
-6.5808		-11.0896	-7.28277								-9.73762			6.5808		11.0896	7.28277								9.73762
-74.391		-13.3647	-11.4915								-15.4749			74.391		13.3647	11.4915								15.4749
-48.0244		-14.7236	-9.5234								-15.597			48.0244		14.7236	9.5234								15.597
-10.9153		-11.6227	-11.9966								-24.1419			10.9153		11.6227	11.9966								24.1419
-8.65726		-18.5602	-13.2129								-14.9865			8.65726		18.5602	13.2129								14.9865
-6.09507		-8.21563	-7.50287								-7.90645			6.09507		8.21563	7.50287								7.90645
-7.07204		-12.5252	-16.7784								-9.24909			7.07204		12.5252	16.7784								9.24909
-9.63643		-16.3303	-18.6667								-19.2588			9.63643		16.3303	18.6667								19.2588
-8.04967		-18.0158	-11.3907								-10.3476			8.04967		18.0158	11.3907								10.3476
-6.3408		-14.6073	-26.3587								-8.3945			6.3408		14.6073	26.3587								8.3945
-13.4851		-8.86075	-7.04962								-8.76072			13.4851		8.86075	7.04962								8.76072
-10.8009		-12.7935	-26.9968								-15.2304			10.8009		12.7935	26.9968								15.2304
-13.3695		-23.1746	-17.163								-13.6435			13.3695		23.1746	17.163								13.6435
-8.18272		-12.862	-76.2889								-7.90618			8.18272		12.862	76.2889								7.90618
-7.21886		-9.63178	-42.337								-7.90611			7.21886		9.63178	42.337								7.90611
-7.46459		-8.37065	-24.5642								-14.0096			7.46459		8.37065	24.5642								14.0096
-11.0689		-19.3635	-10.0345								-17.1834			11.0689		19.3635	10.0345								17.1834
-14.3654		-14.9155	-19.67								-7.66186			14.3654		14.9155	19.67								7.66186
-9.44315		-11.6817	-10.0812								-16.8171			9.44315		11.6817	10.0812								16.8171
-8.54103		-10.174	-7.45273								-10.5915			8.54103		10.174	7.45273								10.5915
-10.3146		-12.911	-19.0982								-7.05143			10.3146		12.911	19.0982								7.05143
-9.0361		-9.06779	-16.5205								-12.0563			9.0361		9.06779	16.5205								12.0563
-6.35076		-10.2647	-11.8165								-14.6197			6.35076		10.2647	11.8165								14.6197
-8.0166		-12.4114	-29.9285								-9.61481			8.0166		12.4114	29.9285								9.61481
-9.30458		-10.7105	-12.6816								-9.73687			9.30458		10.7105	12.6816								9.73687
-6.00906		-12.684	-7.53323								-8.27199			6.00906		12.684	7.53323								8.27199
-8.87988		-18.9711	-13.6969								-7.7837			8.87988		18.9711	13.6969								7.7837
-8.20933		-9.35388	-10.2144								-26.9487			8.20933		9.35388	10.2144								26.9487
-30.7944		-9.48676	-13.3173								-9.85879			30.7944		9.48676	13.3173								9.85879
-6.62654		-9.93959	-21.2502								-8.27184			6.62654		9.93959	21.2502								8.27184
-7.11567		-8.588	-11.6031								-15.8402			7.11567		8.588	11.6031								15.8402
-7.66508		-14.0266	-17.2098								-15.4739			7.66508		14.0266	17.2098								15.4739
-8.15553		-9.50911	-12.121								-14.8635			8.15553		9.50911	12.121								14.8635
-6.14888		-12.0131	-9.67884								-10.5911			6.14888		12.0131	9.67884								10.5911
-9.50776		-10.2499	-38.1656								-8.75999			9.50776		10.2499	38.1656								8.75999
-6.57997		-14.4852	-12.9982								-11.6897			6.57997		14.4852	12.9982								11.6897
-6.15738		-10.2199	-16.232								-8.14962			6.15738		10.2199	16.232								8.14962
-11.5909		-10.8056	-8.98667								-7.17304			11.5909		10.8056	8.98667								7.17304
-7.38095		-8.03527	-9.29014								-13.6427			7.38095		8.03527	9.29014								13.6427
-6.3507		-10.941	-35.5817								-17.4269			6.3507		10.941	35.5817								17.4269
-12.1596		-11.0085	-10.3593								-27.6808			12.1596		11.0085	10.3593								27.6808
-10.6999		-11.184	-11.3737								-7.66122			10.6999		11.184	11.3737								7.66122
-7.16437		-19.837	-19.6002								-9.00398			7.16437		19.837	19.6002								9.00398
-8.33972		-11.0384	-30.8259								-12.2998			8.33972		11.0384	30.8259								12.2998
-9.82684		-20.9056	-13.367								-10.835			9.82684		20.9056	13.367								10.835
-8.30224		-9.3371	-10.1815								-14.4971			8.30224		9.3371	10.1815								14.4971
-20.9398		-9.39332	-26.4735								-9.49216			20.9398		9.39332	26.4735								9.49216
-6.84152		-8.22056	-9.80772								-14.8631			6.84152		8.22056	9.80772								14.8631
-13.81		-10.1071	-10.3321								-21.821			13.81		10.1071	10.3321								21.821
-9.65996		-11.3677	-22.9545								-10.7126			9.65996		11.3677	22.9545								10.7126
-22.3556		-9.4701	-16.2313								-10.3463			22.3556		9.4701	16.2313								10.3463
-20.7078		-8.60065	-9.21024								-13.6422			20.7078		8.60065	9.21024								13.6422
-23.6989		-21.321	-12.6771								-17.5484			23.6989		21.321	12.6771								17.5484
-7.64683		-12.0919	-26.3285								-7.05035			7.64683		12.0919	26.3285								7.05035
-8.92909		-13.3676	-11.0631								-10.8345			8.92909		13.3676	11.0631								10.8345
-12.8359		-11.9757	-12.7098								-7.90476			12.8359		11.9757	12.7098								7.90476
-6.37864		-10.2454	-12.9939								-7.17233			6.37864		10.2454	12.9939								7.17233
-6.68682			-14.0218								-13.3979			6.68682			14.0218								13.3979
-9.92315			-19.7509								-11.3225			9.92315			19.7509								11.3225
-11.6967			-15.3906								-8.14864			11.6967			15.3906								8.14864
-17.4974			-14.0393								-17.7921			17.4974			14.0393								17.7921
-30.5619			-28.1985								-9.85745			30.5619			28.1985								9.85745
-7.01131			-14.6419								-8.51453			7.01131			14.6419								8.51453
-16.1725			-11.8623								-9.73521			16.1725			11.8623								9.73521
-10.6868			-34.9726								-7.53793			10.6868			34.9726								7.53793
-7.20845			-27.7669								-14.3738			7.20845			27.7669								14.3738
-7.70311			-29.0935								-8.63649			7.70311			29.0935								8.63649
-6.17841			-9.54848								-11.322			6.17841			9.54848								11.322
-11.1262			-9.65191								-31.4636			11.1262			9.65191								31.4636
-13.3403			-10.9275								-9.61287			13.3403			10.9275								9.61287
-10.4821			-31.5559								-9.24664			10.4821			31.5559								9.24664
-6.70359			-10.8561								-20.8433			6.70359			10.8561								20.8433
-9.70281			-7.23969								-7.65971			9.70281			7.23969								7.65971
-9.46645			-10.1022								-13.8853			9.46645			10.1022								13.8853
-6.23226			-9.24265								-11.0777			6.23226			9.24265								11.0777
-6.11247			-7.53234								-19.0122			6.11247			7.53234								19.0122
-7.64199			-8.99218								-17.7914			7.64199			8.99218								17.7914
-9.53426			-9.29213								-9.36844			9.53426			9.29213								9.36844
-8.55855			-25.9447								-14.4953			8.55855			25.9447								14.4953
-9.84062			-28.8468								-7.78146			9.84062			28.8468								7.78146
-7.40207			-8.15448								-8.26972			7.40207			8.15448								8.26972
-7.21923			-10.4549								-7.41523			7.21923			10.4549								7.41523
-6.00176			-8.68029								-13.5185			6.00176			8.68029								13.5185
-8.56973			-8.91858								-7.415			8.56973			8.91858								7.415
-7.17289			-19.9609								-9.3681			7.17289			19.9609								9.3681
-10.1258			-11.2872								-9.85627			10.1258			11.2872								9.85627
-6.64777			-8.40054								-7.29277			6.64777			8.40054								7.29277
-6.71025			-12.4846								-9.12382			6.71025			12.4846								9.12382
-19.287			-17.3622								-55.1443			19.287			17.3622								55.1443
-6.71382			-13.5024								-18.2791			6.71382			13.5024								18.2791
-15.0801			-21.8382								-12.4197			15.0801			21.8382								12.4197
-9.83766			-13.7724								-7.17067			9.83766			13.7724								7.17067
-8.56999			-11.4522								-15.1052			8.56999			11.4522								15.1052
-6.31376			-13.0378								-8.02515			6.31376			13.0378								8.02515
-6.86434			-9.37266								-8.75756			6.86434			9.37266								8.75756
-8.08514											-11.8093			8.08514											11.8093
-13.646											-7.65892			13.646											7.65892
-15.2408											-10.5886			15.2408											10.5886
-6.40796											-11.1989			6.40796											11.1989
-25.1515											-29.1433			25.1515											29.1433
-9.58955											-12.4195			9.58955											12.4195
-6.42134											-12.9077			6.42134											12.9077
-8.37642											-19.9878			8.37642											19.9878
-6.38055											-13.0297			6.38055											13.0297
-14.2624											-12.2973			14.2624											12.2973
-6.82492											-16.0815			6.82492											16.0815
											-25.8471														25.8471
											-8.87927														8.87927
											-9.61168														9.61168
											-21.4525														21.4525
											-8.26885														8.26885
											-17.302														17.302
											-9.73367														9.73367
											-31.3401														31.3401
											-7.53638														7.53638
											-21.2083														21.2083
											-7.65842														7.65842
											-14.2502														14.2502
											-10.7102														10.7102
											-7.29218														7.29218
											-11.0764														11.0764
											-7.65833														7.65833
											-29.2647														29.2647
											-7.16996														7.16996
											-8.51271														8.51271
											-7.78014														7.78014
											-9.73325														9.73325
											-10.3435														10.3435
											-11.9304														11.9304
											-7.53574														7.53574
											-7.41346														7.41346
											-12.052														12.052
											-16.9348														16.9348
											-8.14575														8.14575
											-9.24431														9.24431
											-11.0754														11.0754
											-7.65736														7.65736
											-8.5118														8.5118
											-9.24417														9.24417
											-37.0762														37.0762
											-12.0518														12.0518
											-7.04687														7.04687
											-14.7373														14.7373
											-7.16884														7.16884
											-16.5682														16.5682
											-12.5399														12.5399
											-15.4694														15.4694
											-7.04656														7.04656
											-7.77896														7.77896
											-9.48785														9.48785
											-9.40812														9.40812
-9531.99	-7192.92	-10794.7	-12362.8	-6664.24	-7509.39	-5443.91	-9779.2	-5867.93	-7284.91	-5360.04	-10149.4	-7206.36

## Sheet: wt_DMSO
2022_09_13_0006	2022_09_07_0003	2022_09_07_0004	2022_09_07_0005	2022_09_07_0006
0-30	30-60	0-30	0-30	0-30
-10.9999	-14.3752	-12.5358	-7.62269	-12.5875
-8.06995	-13.947	-7.536	-11.798	-12.8439
-6.97091	-6.62015	-10.3581	-7.16677	-11.7078
-6.97089	-14.7983	-7.1919	-9.54976	-9.28579
-14.2942	-7.77925	-9.02303	-17.7918	-7.44576
-7.70219	-9.42645	-10.2465	-11.5273	-19.5688
-24.3034	-20.901	-10.1277	-18.2451	-13.4317
-7.21323	-16.5671	-7.13712	-14.7595	-17.1612
-13.0724	-6.67936	-12.9358	-7.56223	-8.32199
-9.28801	-7.47092	-11.349	-6.87712	-8.14709
-8.18863	-7.53175	-6.71038	-6.63643	-37.1424
-7.45505	-8.75193	-9.57919	-17.515	-8.69045
-8.55353	-7.10311	-9.33522	-8.30731	-17.2978
-10.6283	-10.8864	-15.0729	-7.14788	-10.3443
-10.0172	-10.0303	-16.4158	-7.33408	-18.1197
-7.0875	-10.6388	-8.90861	-13.3064	-10.2021
-7.33086	-13.8121	-7.50489	-22.738	-10.3497
-10.8709	-8.13418	-8.29842	-9.08691	-8.6913
-7.81797	-8.13347	-7.87141	-15.399	-8.08347
-10.3812	-7.21792	-7.38323	-8.34966	-11.3847
-16.8505	-16.8613	-6.95835	-7.31628	-12.4852
-8.4275	-13.6258	-7.87479	-21.0498	-19.1608
-8.42607	-8.92509	-22.0353	-9.31703	-12.5227
-13.9192	-8.98586	-10.3777	-9.50479	-8.21803
-7.20531	-10.7495	-13.979	-14.2682	-9.43974
-9.6466	-14.469	-9.09649	-7.4478	-11.1966
-9.15804	-14.2248	-14.4067	-10.2768	-8.9002
-8.79146	-11.3551	-9.21881	-9.672	-8.97222
-8.54718	-6.77575	-8.05927	-9.79733	-10.677
-8.79123	-6.83451	-6.83865	-9.02298	-9.17532
-7.32638	-7.50277	-7.51011	-11.0525	-10.0341
-7.3261	-9.51591	-7.20498	-9.96511	-11.87
-12.2085	-9.33252	-6.84034	-9.67868	-10.6811
-7.56881	-7.1962	-9.52851	-7.60484	-8.55599
-7.32412	-9.94276	-6.90404	-9.80586	-8.89222
-6.9579	-16.4118	-10.2006	-7.12302	-9.70555
-11.8403	-9.20877	-12.1542	-11.9725	-10.4722
-7.56763	-7.07252	-8.30912	-6.8251	-16.0293
-23.5581	-10.4293	-8.55332	-10.6852	-14.9602
-9.27554	-8.23158	-8.37026	-6.75594	-11.0126
-13.7917	-8.90198	-7.0281	-15.1426	-7.67987
-7.19982	-11.0381	-8.24888	-6.76022	-10.292
-7.93193	-9.93944	-6.60098	-9.09818	-10.9921
-6.71096	-9.9389	-6.9673	-17.6735	-16.7046
-10.9833	-16.3474	-6.60114	-9.2341	-14.6782
-10.2502	-6.76438	-8.1902	-8.33057	-10.229
-11.4706	-7.24982	-7.45918	-15.2953	-9.00958
-9.3949	-20.6164	-22.0467	-7.57482	-9.98829
-8.41723	-8.77553	-8.31424	-10.2103	-17.0724
-19.5255	-8.40014	-9.53501	-8.19	-13.476
-6.95225	-8.88697	-10.0234	-7.64204	-14.9464
-25.1407	-7.42159	-6.72758	-8.80673	-7.92925
-26.2386	-21.8226	-6.72762	-9.06093	-11.4723
-16.3507	-11.5058	-8.68078	-11.0774	-19.8393
-10.4902	-11.0173	-6.72769	-16.3792	-8.3072
-7.194	-9.85662	-9.04729	-6.7128	-10.5664
-6.82728	-8.87898	-7.2165	-16.5669	-7.94478
-11.3438	-8.1451	-10.5744	-7.46682	-9.04417
-6.70423	-6.61759	-6.85127	-11.9918	-7.52952
-6.82466	-8.81436	-8.19414	-13.5203	-9.42249
-10.3641	-6.67811	-9.47598	-8.20041	-7.53192
-7.80062	-6.61646	-6.60793	-7.95735	-13.3318
-7.5552	-6.7379	-8.44395	-8.44224	-9.85782
-7.6771	-9.97255	-29.4419	-10.1566	-15.5976
-9.38558	-13.5734	-7.28958	-6.8304	-14.9321
-29.7713	-6.79851	-9.30909	-7.5631	-11.7646
-8.77516	-8.3854	-7.66141	-7.21238	-8.84168
-7.67629	-7.836	-7.35696	-8.86414	-11.163
-16.0968	-6.73727	-11.9418	-15.1571	-7.69085
-7.30648	-6.67617	-8.2202	-7.7502	-7.69501
-12.9213	-7.65269	-8.40782	-19.6735	-7.81835
-7.06187	-7.5306	-25.0709	-7.16595	-10.505
-7.06174	-14.3661	-24.3424	-8.69682	-8.6765
-9.38088	-13.3284	-15.0677	-6.75067	-8.55519
-6.81728	-6.91965	-9.39506	-7.42921	-7.85249
-9.50265	-6.85856	-7.32034	-6.63828	-14.1441
-10.235	-6.79737	-20.9317	-12.2594	-7.60656
-10.6001	-11.9241	-7.26201	-8.35438	-12.1116
-10.2332	-18.6987	-7.07893	-6.82858	-7.44888
-27.5664	-7.28506	-7.50623	-8.29604	-7.84027
-7.66877	-13.2054	-7.93498	-11.9611	-8.62171
-11.0867	-12.0455	-11.5365	-7.75041	-24.1729
-16.8236	-8.68836	-10.1955	-8.66814	-21.0035
-9.62054	-12.1672	-6.71842	-15.3212	-9.25609
-7.66735	-7.58953	-9.10058	-14.1048	-7.58957
-11.5736	-7.16219	-8.18606	-7.76031	-7.67749
-10.3523	-6.67389	-7.45858	-7.63887	-7.97098
-7.05639	-7.16199	-8.68271	-9.95955	-12.4171
-12.4269	-32.3693	-10.3938	-15.3927	-7.77238
-8.64262	-11.3731	-8.56521	-8.49808	-8.85175
-24.1454	-10.4545	-13.6944	-7.28687	-11.5142
-7.2997	-10.9391	-6.68096	-7.1056	-21.3808
-11.6942	-8.49713	-6.68193	-7.96068	-12.4474
-7.1775	-11.3047	-7.11103	-11.8738	-12.5008
-8.15379	-15.0882	-7.23342	-6.80886	-19.6363
-10.9611	-14.7828	-6.92827	-17.5612	-11.8204
-15.9659	-26.6841	-9.13252	-8.16519	-12.8483
-8.76375	-7.88504	-8.64485	-25.3173	-8.75726
-8.39753	-7.15256	-13.2842	-10.5524	-9.76791
-7.4208	-6.72506	-7.18074	-6.89432	-14.0992
-14.6226	-7.27397	-10.1262	-18.9851	-9.94641
-17.6743	-7.45686	-8.05481	-10.7459	-8.39343
-7.05352	-8.31121	-9.82581	-7.02905	-9.11984
-10.8372	-8.92127	-8.42277	-7.58298	-12.1068
-9.37233	-8.61555	-12.9426	-10.0891	-7.52234
-13.522	-20.7577	-16.5458	-24.3742	-7.46031
-9.61556	-7.63401	-16.7904	-10.6417	-17.1007
-14.01	-7.38914	-28.5746	-8.6329	-7.82323
-14.2534	-11.4164	-7.8918	-12.36	-10.9969
-11.4453	-8.05937	-9.97013	-7.41659	-63.0597
-7.41689	-34.486	-7.16705	-17.4268	-8.12776
-10.4683	-6.7148	-8.26803	-14.505	-8.31079
-10.4678	-6.65278	-13.154	-7.12833	-26.3159
-7.41592	-8.05435	-12.117	-10.245	-8.12721
-9.97897	-7.93121	-6.6239	-7.49972	-7.57786
-11.1984	-12.4472	-8.57705	-9.21552	-7.51681
-13.8838	-10.982	-8.94765	-23.5618	-8.92057
-8.14614	-8.60007	-7.72835	-11.3634	-17.0382
-14.4936	-9.21002	-6.87556	-9.96014	-7.82137
-8.75569	-8.05001	-7.06452	-10.7684	-23.3848
-10.2203	-8.41479	-13.9691	-19.9278	-8.36892
-6.80225	-9.81362	-13.9088	-6.62224	-23.0777
-7.65642	-7.7989	-18.5488	-7.17526	-14.6544
-10.0971	-7.61577	-8.54222	-8.82964	-8.73385
-14.3696	-7.064	-9.97822	-8.16438	-16.4234
-14.9797	-6.69777	-11.6137	-14.8816	-7.63075
-21.3269	-9.01691	-7.93896	-11.4031	-15.0018
-12.4153	-6.81923	-10.1022	-9.88719	-7.61038
-7.65451	-9.07648	-6.61077	-8.98988	-11.5144
-11.9268	-19.8783	-9.66706	-10.2796	-10.4138
-12.9034	-9.13413	-15.6739	-6.98536	-8.39932
-30.8473	-6.69029	-8.60069	-8.02889	-9.68075
-18.0295	-6.69027	-7.02502	-7.9717	-9.19061
-7.53129	-12.7934	-13.2091	-6.63095	-7.71622
-17.907	-9.19122	-16.9988	-7.66894	-11.4368
-19.005	-6.92964	-8.57387	-8.03808	-7.77413
-17.9062	-7.90618	-9.54012	-7.30778	-7.76687
-11.9233	-9.36842	-9.50195	-8.65537	-13.0768
-19.9796	-16.1425	-7.03193	-10.2459	-13.4377
-8.74889	-14.3715	-9.14494	-7.7449	-10.1963
-7.77218	-8.99332	-10.2348	-9.70107	-11.8411
-11.4342	-7.46692	-7.87331	-16.2972	-8.34102
-10.823	-14.7878	-8.06539	-12.5787	-9.37722
-7.64848	-17.6556	-7.4943	-10.0196	-7.48447
-8.01434	-16.9828	-8.48904	-10.876	-21.1561
-21.6861	-11.7938	-7.95094	-9.35026	-19.6835
-12.4086	-7.15458	-6.92344	-7.33679	-9.42652
-8.74639	-7.27586	-12.7301	-8.62812	-27.7842
-27.0566	-14.4147	-9.73528	-6.85943	-12.3282
-14.4831	-8.24967	-6.62626	-11.0727	-10.7324
-7.28085	-10.6291	-17.3365	-13.2748	-12.6204
-12.4074	-13.3733	-15.2613	-22.4934	-12.6045
-8.74453	-7.69696	-7.99815	-6.62759	-7.71501
-7.76776	-13.2488	-9.70714	-10.1164	-7.77171
-13.505	-7.083	-13.5524	-7.1257	-11.2946
-12.8945	-6.95856	-7.75401	-7.07625	-7.50693
-7.27901	-7.68921	-10.6837	-9.21498	-8.54057
-6.79066	-12.8762	-10.5616	-6.65163	-7.93011
-19.73	-12.6916	-10.6227	-15.4411	-13.3556
-7.7662	-8.11392	-8.73058	-12.3392	-7.60591
-7.39968	-7.68519	-7.26573	-12.1574	-19.4391
-7.64381	-8.84467	-7.44884	-7.94626	-14.248
-7.6437	-6.64738	-7.32677	-13.2603	-9.1819
-7.15538	-6.89093	-7.32677	-8.98977	-13.7591
-8.25354	-6.70765	-11.6603	-17.2319	-7.439
-17.1644	-6.89075	-7.87608	-13.5171	-12.7481
-7.27668	-7.86104	-8.05919	-10.4655	-7.8031
-19.3601	-7.67758	-7.93712	-6.81348	-8.89515
-17.5272	-8.40698	-8.48644	-6.63992	-9.3832
-12.1555	-9.86529	-6.89952	-8.11211	-8.2227
-15.3291	-13.5269	-8.36437	-7.81141	-8.22245
-10.4459	-7.11701	-7.2047	-9.15588	-9.5651
-8.2481	-7.97146	-7.93712	-10.076	-7.79491
-11.7879	-14.3767	-9.95128	-7.20966	-10.0531
-6.66023	-7.35497	-12.2096	-7.2711	-10.8465
-13.1299	-16.2042	-7.69298	-15.5131	-20.9781
-8.7346	-6.9873	-6.71642	-10.7536	-12.4939
-8.12422	-16.6892	-8.91368	-11.4887	-10.2355
-7.39115	-9.72854	-18.8014	-7.52151	-8.09899
-10.0762	-10.2155	-8.18126	-7.52202	-8.46502
-9.09873	-7.83402	-12.0265	-17.2281	-8.34288
-13.1268	-10.3946	-7.81505	-8.50203	-7.73245
-10.685	-11.5536	-12.881	-8.68616	-28.2395
-12.269	-18.8141	-13.3692	-6.98107	-9.25663
-16.4193	-8.07082	-6.77745	-7.89674	-7.73069
-8.6067	-18.2621	-10.7447	-11.8661	-11.3926
-7.01952	-7.75877	-18.3131	-7.29252	-9.80555
-7.14134	-9.58756	-7.2047	-7.59779	-8.40165
-7.87346	-7.81738	-8.79161	-9.67991	-8.58471
-20.5687	-14.1626	-10.3785	-12.1221	-8.27946
-9.21591	-7.0751	-7.14366	-8.71037	-10.5376
-7.38482	-8.53827	-6.83849	-6.63595	-9.25574
-13.9764	-7.134	-6.89952	-8.90528	-7.42463
-16.1735	-10.1247	-8.4254	-11.2405	-7.85176
-7.38386	-56.6942	-9.58507	-6.79069	-7.66861
-12.8769	-7.1331	-7.3878	-10.1481	-9.49961
-12.144	-10.4899	-9.6461	-11.6136	-8.15666
-23.4964	-7.31607	-7.44884	-15.157	-7.4852
-18.3685	-14.3351	-7.50987	-10.6451	-7.85138
-13.9738	-11.4664	-6.96056	-8.33152	-7.91231
-12.2647	-9.45214	-33.5108	-6.98898	-7.85124
-7.38121	-9.33004	-9.15782	-6.74624	-12.4287
-7.62522	-6.64445	-6.77745	-12.487	-9.37682
-7.13644	-7.86512	-6.77745	-10.5963	-9.25462
-7.1364	-6.88854	-11.8434	-6.99609	-12.3063
-7.25826	-6.70542	-10.2565	-33.5695	-7.96999
-8.84474	-6.70541	-8.4254	-11.475	-17.4912
-9.33219	-7.74299	-7.02159	-9.40531	-10.9499
-16.4121	-6.64432	-7.57091	-8.79755	-19.1881
-15.1901	-7.19361	-6.96056	-9.9593	-18.4543
-8.23208	-8.35315	-6.89952	-6.97966	-7.4039
-9.20823	-8.35313	-9.34093	-10.8908	-12.1021
-18.3632	-7.80369	-6.89952	-8.02248	-12.7109
-8.10884	-10.8552	-6.71642	-10.3448	-20.9487
-17.7524	-20.5597	-9.52403	-18.7082	-12.83
-8.96327	-22.4515	-10.5616	-7.11279	-10.6845
-20.3156	-6.82644	-6.89952	-7.78421	-13.0024
-20.3156	-7.67495	-8.73058	-6.93326	-20.9893
-14.211	-9.26185	-8.60851	-8.03475	-25.8059
-14.9432	-12.6155	-12.2096	-6.81731	-12.561
-7.1305	-8.09891	-9.58507	-12.9841	-9.81015
-7.13049	-7.60815	-7.63194	-11.7044	-11.3345
-8.10678	-9.19466	-9.15782	-9.63463	-8.64411
-11.4025	-7.17947	-11.6603	-20.2041	-10.5294
-7.49613	-7.23978	-7.75401	-9.77082	-11.8078
-8.59406	-9.13064	-6.77745	-11.1821	-9.66719
-17.3829	-29.516	-6.89952	-10.0885	-7.58531
-11.6437	-10.7164	-7.69298	-12.5926	-12.5203
-8.34767	-20.1752	-6.71642	-9.90904	-13.418
-19.3334	-8.08706	-7.69298	-17.296	-7.92479
-7.49176	-6.68119	-7.50987	-17.3029	-7.61952
-7.73574	-7.96136	-6.65538	-6.93194	-8.59606
-13.4728	-11.7449	-7.14366	-10.4142	-9.50729
-7.00303	-8.87604	-6.65538	-11.0868	-10.4217
-8.8336	-9.24171	-23.9894	-12.495	-11.2113
-22.9935	-7.77666	-9.76817	-10.9773	-8.52535
-10.0531	-13.4524	-6.65538	-8.9635	-12.675
-7.00131	-8.87296	-14.59	-14.0933	-7.66794
-9.32058	-7.52923	-9.58507	-6.95228	-20.4217
-7.85566	-10.1525	-20.3273	-6.95231	-14.7365
-7.85564	-13.6256	-7.50987	-12.3304	-12.2838
-6.99993	-11.55	-6.77745	-21.0605	-8.05832
-7.48776	-11.0617	-6.77745	-8.73216	-7.44654
-9.56272	-10.085	-7.32677	-8.79379	-11.3485
-6.99886	-19.8505	-7.99815	-8.73461	-8.476
-9.80584	-16.0654	-8.60851	-7.33263	-8.95988
-9.19507	-7.70306	-7.81505	-7.76031	-7.79676
-23.1111	-6.72182	-7.26573	-10.3867	-12.3109
-15.6647	-8.36959	-7.08263	-8.37351	-8.33763
-8.21821	-10.322	-7.02159	-6.91972	-16.8821
-8.34007	-10.3209	-10.8668	-14.5641	-11.7546
-20.9127	-12.5788	-8.4254	-6.99584	-9.17865
-13.4663	-6.96347	-7.02159	-11.3349	-12.2905
-18.4704	-6.84139	-8.4254	-9.32982	-21.6879
-15.2962	-9.09964	-8.05919	-16.0619	-10.0907
-11.6333	-14.5919	-9.27989	-10.9962	-8.13658
-15.1721	-7.0845	-9.463	-9.35618	-13.0715
-7.35946	-7.6936	-8.97472	-6.6178	-8.98152
-11.876	-7.50578	-7.14366	-18.7639	-8.42559
-34.4586	-13.1812	-8.36437	-9.00394	-7.44437
-20.6646	-7.74334	-17.7638	-8.17099	-9.21423
-7.1145	-13.2346	-6.77745	-9.20864	-24.1675
-7.96897	-8.7161	-8.91368	-10.1856	-13.7304
-14.1945	-7.3727	-6.96056	-16.412	-7.85352
-15.2931	-7.00623	-6.71642	-6.89201	-8.58495
-8.82324	-28.7938	-7.87608	-7.99197	-14.4359
-13.8269	-8.22461	-7.69298	-6.64924	-9.54685
-7.96673	-16.5253	-7.69298	-10.6796	-8.44816
-13.4594	-13.2244	-10.1344	-7.2617	-13.3912
-25.9104	-16.7019	-8.66954	-10.9304	-7.82978
-8.21001	-9.49857	-10.9278	-14.1701	-11.0646
-10.406	-8.94834	-7.63194	-10.083	-16.8594
-11.6266	-33.7847	-10.3785	-12.2255	-8.67826
-13.0913	-6.8057	-6.96056	-6.61033	-9.34949
-22.3681	-7.1093	-16.8483	-9.2352	-8.61523
-9.42845	-9.79358	-7.93712	-7.47369	-8.43043
-31.4003	-20.8408	-9.58507	-10.2891	-7.63693
-13.822	-6.86365	-10.1954	-15.4797	-7.51484
-6.74176	-12.8442	-6.89952	-20.0012	-10.2555
-11.0139	-6.9831	-10.9889	-6.82887	-11.2881
-16.507	-7.83737	-9.89024	-18.6718	-11.8386
-11.9901	-8.44688	-8.18126	-7.02679	-20.874
-6.86237	-8.56485	-8.91368	-15.1452	-15.2619
-16.5056	-8.13664	-9.58507	-10.509	-31.4982
-8.08269	-6.61021	-7.2047	-11.425	-8.79399
-18.7022	-10.3333	-7.08263	-8.43863	-8.85528
-10.7675	-6.61012	-7.93712	-7.52464	-14.471
-10.0334	-7.46431	-12.5758	-7.03643	-12.5183
-7.7139	-10.6361	-6.71642	-9.72235	-7.51469
-11.6201	-13.1371	-7.02159	-11.2596	-10.3838
-8.56806	-11.5475	-7.81505	-18.8282	-9.8971
-18.3328	-18.1384	-12.1485	-6.62989	-10.8755
-11.6184	-12.7657	-10.1954	-7.73218	-10.1441
-6.97941	-7.94346	-6.96056	-9.32692	-13.1353
-6.61317	-10.5065	-9.95128	-12.4399	-33.6447
-14.6681	-7.08601	-6.71642	-18.4227	-46.6471
-19.1847	-7.51312	-8.60851	-7.44316	-7.58782
-12.8368	-6.78068	-7.32677	-6.65474	-8.07883
-8.19763	-14.3483	-9.82921	-9.22296	-16.5032
-7.95322	-7.99898	-7.57091	-7.82161	-11.6272
-15.5207	-31.6805	-7.81505	-7.89202	-7.54198
-8.19621	-10.2565	-7.44884	-6.97654	-7.54255
-21.6233	-11.2325	-7.99815	-8.38539	-12.4871
-15.0314	-9.15714	-6.83849	-8.02061	-9.9393
-8.80575	-8.78911	-7.14366	-6.61821	-18.3134
-8.80563	-8.23975	-6.65538	-7.36193	-9.117
-9.29359	-7.44626	-7.26573	-10.658	-13.6953
-25.2845	-6.89685	-9.89024	-11.333	-15.5882
-9.4152	-7.56822	-9.89024	-7.30495	-13.0441
-23.331	-9.09406	-8.66954	-7.49609	-20.6754
-16.1287	-8.05444	-11.5382	-9.2679	-9.75875
-8.92555	-8.9026	-9.6461	-10.1297	-10.0134
-16.9819	-10.1842	-8.85265	-8.60468	-9.59684
-15.1504	-15.3093	-7.75401	-18.8594	-8.01024
-7.09321	-14.4538	-7.75401	-8.97866	-10.1011
-16.9804	-7.8613	-12.4537	-7.94234	-8.34159
-6.97005	-6.70107	-24.4776	-8.57085	-12.8816
-18.6885	-10.6052	-15.0172	-11.015	-9.05832
-25.0358	-9.4447	-8.4254	-7.41404	-7.79874
-11.9742	-15.9751	-7.32677	-6.98684	-10.9868
-9.04419	-7.79604	-7.32677	-9.06274	-8.91859
-16.4903	-6.69739	-11.7213	-10.412	-12.591
-11.2411	-6.69552	-6.71642	-11.7604	-9.17662
-8.18928	-7.12255	-8.05919	-7.85689	-10.9496
-11.6069	-8.159	-29.2384	-10.8508	-22.4861
-8.79913	-8.03651	-20.5714	-11.901	-18.0376
-14.2918	-7.79173	-20.3273	-26.0675	-12.0763
-21.1273	-12.9766	-7.2047	-7.51294	-7.86849
-13.0705	-13.7043	-8.48644	-8.61194	-9.51664
-18.3195	-8.08862	-8.05919	-11.5469	-11.9012
-7.33295	-9.55309	-7.87608	-7.15784	-7.63264
-10.5066	-9.00241	-24.5997	-9.54039	-8.00128
-13.9246	-12.1716	-6.65538	-8.8703	-8.00332
-10.6279	-6.73639	-6.89952	-7.89507	-12.8997
-10.6276	-16.3797	-8.85265	-8.56993	-9.61086
-20.5152	-12.0457	-6.83849	-14.5518	-8.5364
-8.67439	-16.623	-7.50987	-19.6185	-8.48735
-10.0162	-7.16011	-6.71642	-13.5159	-12.526
-7.08644	-9.9066	-6.83849	-11.5052	-9.74056
-17.5844	-6.67145	-7.75401	-12.7876	-8.78077
-7.81871	-8.44106	-6.83849	-6.68682	-7.90878
-7.08589	-7.09773	-30.2149	-8.10698	-10.9131
-9.52701	-6.60829	-11.1109	-6.82563	-15.375
-14.1655	-13.8103	-6.65538	-6.72278	-13.9172
-7.45159	-13.9322	-12.7589	-7.51629	-17.2199
-12.7005	-7.09616	-15.4444	-7.76613	-14.047
-13.5549	-16.4951	-12.0875	-6.8522	-20.1385
-15.2633	-6.97005	-11.7823	-7.70676	-13.2692
-9.648	-7.64055	-7.14366	-6.73025	-9.31192
-8.30501	-17.1618	-7.99815	-8.80939	-9.50013
-21.8545	-8.31078	-6.89952	-6.73424	-8.53365
-14.1637	-6.84534	-7.81505	-7.52772	-11.106
-12.5763	-8.37042	-6.83849	-24.6213	-7.93567
-8.18141	-11.2997	-8.48644	-7.23042	-9.46265
-9.15783	-6.78303	-6.83849	-7.90306	-9.59148
-10.2554	-6.78288	-15.2613	-9.06319	-10.0492
-9.76694	-9.46826	-8.60851	-22.7987	-8.46655
-14.5273	-6.78261	-6.65538	-7.66298	-16.2287
-11.9636	-6.72157	-6.77745	-27.5029	-8.53987
-7.56902	-6.71914	-7.57091	-17.2509	-7.99385
-7.81304	-6.65738	-10.3175	-11.6972	-8.00176
-40.7719	-15.627	-9.6461	-8.23545	-8.53745
-7.5683	-6.95994	-7.87608	-26.4276	-7.50858
-9.15478	-7.08188	-9.15782	-9.22139	-11.2997
-7.44579	-8.79058	-15.6275	-7.45352	-8.00421
-7.81193	-10.0112	-8.05919	-7.63676	-8.31615
-8.29974	-6.71529	-13.9796	-10.3918	-11.9175
-7.2011	-10.6206	-7.14366	-9.36508	-13.5768
-10.8631	-11.5342	-6.89952	-18.3377	-16.3859
-8.78763	-10.8017	-8.66954	-10.2814	-9.24533
-8.0552	-10.3123	-10.9278	-13.8833	-9.42965
-7.07859	-7.19941	-12.942	-7.59694	-13.1028
-7.44363	-22.1527	-11.5992	-7.35729	-11.2158
-14.1573	-9.57777	-35.8302	-23.4812	-13.9653
-11.3496	-6.70909	-11.9654	-7.92642	-10.3079
-30.6362	-19.9536	-8.85265	-8.11022	-12.3318
-8.66302	-10.2485	-33.5108	-10.6266	-9.35052
-19.0389	-7.19676	-9.34093	-7.39418	-20.2788
-7.31999	-7.37934	-7.44884	-12.7815	-8.07976
-11.1039	-7.13518	-16.9703	-7.84088	-7.57847
-7.68504	-9.94224	-14.2848	-6.98643	-11.5857
-18.427	-6.76838	-15.9327	-7.29226	-9.22844
-7.07415	-6.64625	-8.91368	-15.4802	-12.4102
-11.5904	-6.89033	-6.65538	-15.6648	-9.66421
-9.75868	-6.88911	-13.1251	-6.88626	-10.7686
-7.9275	-13.8471	-20.1441	-8.17017	-8.14924
-11.4675	-7.19421	-7.2047	-17.9445	-8.09096
-6.82807	-8.90294	-7.32677	-8.18061	-8.39932
-19.1568	-8.16984	-8.05919		-12.5514
-9.87859	-12.9912	-7.50987		-7.72988
-8.16871	-8.28944	-10.9278		-19.9467
-13.1736	-7.12915	-8.12022		-8.19649
-9.38895	-7.61587	-10.0123		-7.60055
-8.16823	-7.00424	-8.2423		-14.4442
-6.82541	-7.67561	-8.18126		-8.30846
-8.4122	-6.94078	-7.44884		-28.7566
-28.5536	-6.81867	-11.9044		-7.94521
-13.2948	-7.36258	-9.52403		-9.42171
-9.75393	-20.7895	-11.9044		-14.855
-6.82394	-9.73863	-9.76817		-7.83681
-9.26454	-6.62525	-12.0875		-8.20541
-6.94516	-12.3012	-10.6837		-8.11514
-26.2321	-7.7845	-12.8199		-12.9996
-20.006	-7.78309	-8.60851		-10.572
-7.55425	-6.86516	-8.91368		-9.48867
-28.5495	-7.04639	-7.63194		-7.92627
-7.18669	-21.4506	-11.4772		-8.18015
-18.7832	-9.24335	-7.14366		-10.0226
-14.3885	-16.1396	-10.1954		-12.3511
-14.3884	-15.6512	-7.75401		-8.15325
-7.06385	-11.1951	-13.3082		-15.6004
-6.94167	-7.59315	-9.463		-18.5967
-14.9981	-10.461	-8.91368		-8.03989
-31.3553	-9.05226	-7.14366		-15.1274
-25.2517	-7.3422	-13.4303		-7.50412
-7.06324	-7.21644	-6.77745		-10.1327
-13.8989	-8.49815	-6.71642		-11.5496
-9.13795	-8.49761	-8.73058		-8.07454
-16.7063	-16.553	-7.26573		-21.1504
-19.0252	-21.0081	-11.5382		-12.3662
-7.55038	-15.9415	-15.6886		-8.1649
-11.9448	-11.24	-9.52403		-10.9851
-12.432	-7.69902	-22.2193		-9.82612
-10.1123	-6.9044	-7.26573		-10.6209
-10.6003	-17.4634	-7.57091		-11.539
-7.79238	-10.0165	-10.5616		-18.7457
-7.91314	-7.08603	-7.75401		-11.5472
-7.05861	-8.85521	-10.7447		-12.341
-10.476	-8.36577	-6.65538		-7.88562
-10.842	-11.0501	-11.5992		-17.9723
-7.54476	-9.03557	-8.66954		-8.22093
-7.17854	-7.32607	-14.2848		-8.91889
-7.91094	-7.63041	-11.8434		-8.43084
-7.05617	-7.20258	-6.96056		-8.85827
-15.1121	-10.0658	-7.26573		-8.6177
-18.408	-20.3192	-9.21886		-7.96953
-12.0599	-11.2852	-9.76817		-18.7161
-43.1874	-10.1859	-8.91368		-8.59044
-30.6138	-8.29377	-9.89024		-7.50434
-9.00693	-7.98838	-7.08263		-8.66452
-15.5985	-7.6211	-11.7823		-8.2378
-7.05361	-13.8464	-20.0831		-13.489
-9.25077	-10.7907	-8.36437		-13.0641
-19.8707	-10.0575	-7.14366		-7.88721
-16.6953	-9.9334	-7.08263		-8.51576
-7.54001	-8.58903	-7.02159		-7.7338
-6.68469	-8.03708	-7.81505		-8.77186
-14.3749	-14.0172	-7.02159		-10.5433
-13.3979	-10.0495	-8.12022		-12.0123
-6.68375	-10.1093	-7.93712		-8.42927
-7.65999	-19.2027	-20.6935		-10.9355
-17.6693	-9.55544	-8.30333		-8.98672
-14.9837	-8.33387	-12.2096		-10.9184
-8.39175	-16.328	-9.89024		-7.99417
-13.5183	-6.68214	-8.05919		-13.4296
-21.941	-20.3507	-7.26573		-8.44381
-16.8139	-9.48408	-7.3878		-9.42147
-7.53645	-8.75008	-7.14366		-7.89783
-6.926	-8.81001	-14.8951		-13.0448
-8.51225	-9.90775	-7.93712		-8.53422
-7.04734	-11.8604	-10.7447		-16.0154
-13.2729	-9.53847	-9.40196		-7.40972
-8.2675	-14.1761	-8.60851		-11.8063
-9.36601	-14.4171	-7.26573		-11.8087
-15.9574	-8.86166	-6.83849		-11.0163
-26.4547	-8.86115	-8.18126		-26.5857
-10.2189	-15.3905	-6.89952		-12.6259
-13.7583	-12.3986	-10.5616		-20.7443
-10.4617	-6.72105	-14.1627		-7.50588
-12.5359	-10.8712	-8.05919		-12.5226
-13.6343	-7.14788	-11.1109		-7.70131
-7.16456	-7.02542	-7.02159		-7.51867
-9.23882	-10.9316	-7.3878		-11.489
-9.60495	-7.32791	-15.2613		-7.71926
-6.67405	-8.30384	-11.6603		-10.5351
-8.99233	-6.9	-9.89024		-7.43305
-7.03843	-7.69165	-7.50987		-9.96986
-8.99127	-9.76525	-7.02159		-8.20587
-9.47924	-9.33765	-18.6183		-12.4176
-14.1175	-17.0885	-10.0123		-14.2111
-7.03634	-9.3363	-8.60851		-9.82017
-48.54	-13.8528	-16.421		-8.84741
-23.515	-7.5027	-13.9186		-8.05645
-22.66	-9.08632	-6.83849		-12.34
-17.2889	-12.3188	-8.73058		-13.9967
-9.4744	-8.89985	-7.87608		-8.0164
-17.5301	-12.2566	-12.3927		-30.2367
-12.4028	-8.408	-11.233		-10.8346
-7.51867	-10.4831	-6.71642		-7.78408
-8.12756	-13.7771	-18.13		-7.60148
-7.88314	-9.01628	-11.7213		-13.2836
-10.3243	-17.8656	-7.02159		-13.837
-7.27221	-12.9818	-12.2706		-11.7031
-26.1927	-16.7046	-8.4254		-9.75256
-7.75974	-6.69485	-7.99815		-12.2684
-14.9611	-6.63302	-10.2565		-9.15628
-7.51386	-6.87698	-7.08263		-9.27853
-7.5135	-13.041	-13.3692		-8.30218
-19.9641	-9.01015	-8.91368		-7.51575
-24.8468	-7.36216	-9.21886		-13.5058
-17.399	-6.93397	-12.3927		-22.3709
-9.95261	-6.81188	-10.3785		-18.1615
-25.332	-6.62876	-7.2047		-10.1719
-29.9695	-6.87288	-7.99815		-9.32667
-16.9077	-8.15408	-7.32677		-13.796
-11.1701	-8.39601	-24.0504		-26.5679
-8.2395	-9.7344	-20.3883		-10.2337
-17.2726	-6.80422	-11.233		-8.85082
-19.3472	-11.1936	-9.76817		-15.5075
-12.5111	-24.8637	-40.3468		-9.03816
-24.962	-8.20092	-17.7027		-8.92391
-16.0508	-8.20045	-14.651		-8.25642
-28.3798	-6.91651	-7.2047		-20.7079
-8.11587	-8.50155	-8.05919		-8.28286
-7.74919	-22.4775	-25.027		-7.97984
-8.3594	-30.5331	-8.18126		-33.0045
-25.0828	-6.60724	-7.3878		-16.4687
-12.3874	-7.94946	-11.6603		-15.8011
-8.60257	-18.8137	-17.3365		-8.29453
-10.3115	-15.2735	-10.6227		-8.23468
-11.1656	-12.4656	-15.5055		-11.5311
-7.99135	-7.52097	-8.54747		-9.71522
-16.5358	-8.13127	-8.12022		-10.7985
-7.13558	-8.98359	-7.63194		-9.21384
-13.849	-8.80033	-12.6368		-11.048
-9.33228	-6.66377	-12.0875		-10.4452
-6.7684	-6.78577	-7.08263		-7.52986
-15.4349	-7.76227	-17.3976		-9.62595
-7.37825	-13.9265	-8.30333		-23.8495
-7.49996	-21.6144	-20.8766		-13.7868
-11.0396	-9.46755	-10.3175		-7.44268
-8.84214	-7.50953	-18.3131		-10.9225
-6.64487	-7.08068	-10.2565		-7.99729
-20.8048	-6.65278	-7.26573		-19.8273
-6.64332	-7.07984	-17.5196		-8.37329
-18.1178	-42.663	-11.4161		-13.0908
-23.2445	-8.29893	-11.7823		-10.6571
-6.76477	-10.4949	-7.08263		-8.46105
-6.64176	-17.635	-6.65538		-9.76357
-6.64	-10.1266	-7.08263		-17.0943
-7.98249	-6.95277	-12.7589		-9.89535
-7.73754	-7.38	-9.09679		-13.193
-16.5262	-7.99031	-10.0123		-8.49441
-7.24863	-6.83063	-14.4679		-9.84866
-10.7884	-7.01371	-15.9938		-7.53084
-19.5772	-6.8306	-15.1393		-7.66611
-18.3563	-7.62404	-11.5992		-10.8414
-7.36993	-8.60057	-9.03575		-35.1962
-6.63716	-6.64345	-11.7823		-11.0808
-7.49125	-6.64339	-9.70714		-9.07437
-9.44374	-6.76545	-15.5055		-13.9008
-6.75792	-8.47441	-7.14366		-8.84198
-13.9594	-18.362	-11.1109		-10.3085
-8.58766	-6.82633	-18.13		-10.985
-8.22136	-15.0047	-9.82921		-11.6081
-11.5158	-15.4289	-8.36437		-9.48246
-6.87693	-7.85899	-7.08263		-10.1542
-7.12014	-11.887	-22.0362		-15.1681
-9.43693	-9.4441	-16.1158		-9.55539
-10.657	-8.34481	-7.02159		-8.27901
-7.72706	-14.3258	-7.69298		-12.5606
-11.877	-10.1123	-7.14366		-9.71355
-14.9288	-8.21921	-8.66954		-10.9785
-21.0316	-24.6355	-16.2989		-12.7598
-6.62728	-10.1685	-12.3317		-7.41246
-13.3408	-9.43482	-12.0875		-8.63332
-7.35869	-9.3125	-7.93712		-18.1005
-12.4851	-8.51763	-7.81505		-18.7742
-11.2641	-7.9065	-14.9562		-13.0993
-7.11272	-7.78424	-11.2941		-13.5395
-20.4183	-7.17158	-8.2423		-15.6423
-6.99012	-9.85666	-8.66954		-7.52613
-8.45349	-15.5312	-52.0655		-9.85396
-27.0067	-10.2199	-7.32677		-7.84056
-13.5784	-9.18172	-6.96056		-11.0203
-7.5964	-10.8283	-7.2047		-9.87133
-6.98565	-9.78987	-7.75401		-21.2316
-12.7229	-7.28685	-8.4254		-9.45224
-28.3477	-6.67636	-7.99815		-8.23353
-17.7264	-11.986	-8.4254		-8.23383
-9.54669	-16.6856	-12.881		-14.0387
-16.9929	-6.61442	-8.54747		-22.2189
-8.08076	-8.01816	-10.8668		-9.53894
-7.10411	-13.9993	-8.05919		-7.6667
-16.3812	-6.73577	-12.1485		-9.1449
-12.7183	-8.25996	-7.81505		-7.87262
-8.93338	-10.3942	-13.003		-10.5656
-8.44465	-24.4316	-10.2565		-10.6963
-11.9845	-9.84158	-9.463		-24.026
-6.97946	-10.9988	-6.96056		-8.11817
-20.7725	-10.3266	-10.5616		-8.33505
-8.44326	-7.82326	-8.30333		-9.1897
-6.85634	-11.1795	-8.54747		-14.3214
-9.78593	-6.96447	-7.44884		-10.1122
-25.8986	-12.395	-11.6603		-8.1077
-17.5976	-18.7417	-12.1485		-9.39774
-38.2273	-6.71664	-12.1485		-11.4951
-9.90684	-25.0881	-12.6368		-16.5999
-13.2023	-6.8379	-8.79161		-19.1641
-11.4923	-7.19684	-16.2989		-7.99808
-7.09722	-6.70697	-19.839		-13.0809
-12.8339	-7.25627	-6.89952		-7.95423
-11.8564	-7.12896	-13.3692		-21.384
-15.1509	-8.89841	-14.1017		-7.96255
-17.104	-19.213	-7.26573		-17.1837
-30.4096	-8.40944	-11.4772		-13.5381
-8.80267	-8.10351	-10.1954		-15.074
-8.92446	-6.94351			-13.5592
-6.8487	-10.7273			-31.1466
-6.84641	-21.8966			-10.7067
-7.33429	-10.1774			-8.18159
-9.53133	-8.57456			-12.8218
-30.0391	-9.67252			-8.74259
-7.82214	-7.53533			-14.9201
-6.84531	-11.5609			-15.9769
-11.9722	-7.28745			-7.67638
-10.3849	-15.4651			-8.5463
-21.2488	-20.7106			-10.6373
-6.72197	-8.44194			-13.2641
-7.94221	-11.0049			-8.092
-12.2142	-8.43915			-7.9091
-11.8477	-10.8795			-10.1075
-8.42831	-7.94944			-7.42219
-6.96345	-14.8442			-11.39
-12.9439	-14.5958			-9.74677
-7.08334	-7.2712			-10.2353
-7.3274	-12.0306			-8.03829
-23.1947	-9.40605			-11.5869
-8.54621	-20.7573			-8.41807
-6.715	-8.97679			-8.35738
-9.52112	-13.7367			-13.7913
-6.83458	-6.71755			-11.0464
-25.2669	-7.74835			-15.8691
-9.88591	-8.41819			-7.4465
-6.71208	-8.04924			-7.9631
-9.03114	-7.43816			-8.27016
-6.71155	-9.14531			-10.4402
-22.2144	-9.38921			-8.51614
-8.78664	-7.67659			-11.6893
-6.83108	-8.77352			-11.4
-9.39431	-7.18619			-10.3902
-8.17328	-10.0523
-9.02764	-6.69103
-6.70812	-10.3516
-7.31846	-7.29974
-13.0557	-12.3035
-18.1813	-8.51812
-18.6692	-7.78517
-7.6825	-20.7829
-19.4011	-10.0999
-19.645	-22.7949
-7.43784	-15.6522
-7.07162	-6.98519
-7.31541	-6.80191
-8.53608	-6.61878
-23.6724	-7.16808
-10.4887	-7.71736
-22.3295	-11.0128
-11.2208	-24.1961
-19.8878	-9.85279
-7.06994	-8.75281
-11.5861	-10.8887
-26.1113	-6.67624
-7.67859	-7.10296
-8.8992	-7.83491
-11.5846	-6.61418
-17.1998	-7.71129
-7.79974	-11.861
-6.70059	-6.67299
-8.28734	-15.1565
	-10.0904
	-7.83007
	-10.881
	-14.0538
	-8.92482
	-7.27452
	-15.3311
	-10.1422
	-7.63937
	-7.69919
	-9.58974
	-7.88063
	-7.39043
	-7.51249
	-8.00075
	-11.9653
	-36.2551
	-12.0229
	-10.6174
	-8.11375
	-14.5217
	-7.99079
	-17.3871
	-7.19421
	-6.9486
	-7.00861
	-7.92407
	-19.884
	-10.1789
	-9.26254
	-8.95734
	-10.9699
	-9.44273
	-8.70954
	-13.8961
	-14.6282
	-14.8716
	-7.4252
	-12.3673
	-7.1788
	-9.07056
	-7.23866
	-11.1446
	-8.94635
	-6.74743
	-9.12724
	-7.72082
	-6.92725
	-6.62205
	-8.81894
	-9.48789
	-6.73873
	-28.0388
	-7.71166
	-7.65053
	-7.71115
	-7.58901
	-7.03968
	-13.6922
	-8.1379
	-6.91444
	-13.0179
	-7.15825
	-30.7752
	-10.1453
	-10.1419
	-10.6295
	-7.08827
	-9.28362
	-15.0202
	-10.7459
	-6.83956
	-36.7466
	-11.4779
	-20.3279
	-16.4825
	-12.9424
	-13.4304
	-16.9703
	-6.71609
	-10.6223
	-7.02032
	-8.85112
	-7.63026
	-15.8089
	-7.32497
	-7.01972
	-6.89745
	-11.0448
	-7.62354
	-8.41091
	-10.3016
	-10.2371
	-10.542
	-12.0059
	-10.3562
	-7.30306
	-9.56112
	-17.4952
	-33.6693
	-27.0773
	-8.52252
	-6.75241
	-13.9545
	-6.7523
	-18.1658
	-10.231
	-7.42301
	-7.17825

## Sheet: unc-68ns
2022_09_06_0001	2022_09_06_0002	2022_09_06_0003	2022_09_06_0004	2022_09_06_0005	2022_09_06_0006	2022_09_06_0007	2022_09_06_0008	2022_09_06_0009	2022_09_06_0010	2022_09_06_0011	2022_09_06_0012	2022_09_06_0013
0-30s	30-60s	30-60s	0-30s	30-60s	20-46s	8-34s	30-60s	0-30s	30-60s	0-30s	30-60s	30-60
-11.9882	-5.55763	-7.0057	-10.136	-10.9282	-7.50687	-4.50001	-11.9029	-6.98742	-20.0487	-10.0531	-4.41518	-6.37007		11.9882	5.55763	7.0057	10.136	10.9282	7.50687	4.50001	11.9029	6.98742	20.0487	10.0531	4.41518	6.37007
-5.31355	-25.4333	-34.8453	-6.9622	-12.0969	-14.0988	-4.62214	-13.7977	-5.1563	-7.53193	-8.24848	-5.01915	-8.38541		5.31355	25.4333	34.8453	6.9622	12.0969	14.0988	4.62214	13.7977	5.1563	7.53193	8.24848	5.01915	8.38541
-7.07174	-5.41002	-18.1835	-6.04666	-9.92221	-11.2916	-9.81214	-4.89068	-6.49907	-4.29532	-11.4841	-4.10104	-6.12733		7.07174	5.41002	18.1835	6.04666	9.92221	11.2916	9.81214	4.89068	6.49907	4.29532	11.4841	4.10104	6.12733
-5.78947	-5.10481	-10.9825	-9.89178	-6.08123	-10.3196	-4.50795	-8.00379	-5.03418	-4.41214	-11.3397	-4.71137	-6.55507		5.78947	5.10481	10.9825	9.89178	6.08123	10.3196	4.50795	8.00379	5.03418	4.41214	11.3397	4.71137	6.55507
-5.11639	-9.61166	-5.30865	-7.14519	-6.41112	-19.2352	-5.24133	-4.89164	-10.6493	-4.15775	-10.8136	-4.28408	-20.4711		5.11639	9.61166	5.30865	7.14519	6.41112	19.2352	5.24133	4.89164	10.6493	4.15775	10.8136	4.28408	20.4711
-6.85442	-7.90247	-8.05643	-6.22906	-18.1945	-12.9514	-7.62403	-7.21137	-11.8698	-6.8825	-6.31503	-16.6741	-16.9941		6.85442	7.90247	8.05643	6.22906	18.1945	12.9514	7.62403	7.21137	11.8698	6.8825	6.31503	16.6741	16.9941
-5.33675	-10.0705	-7.50717	-7.32763	-15.1009	-18.5059	-5.91759	-4.52816	-5.94911	-11.3959	-6.92272	-4.64466	-4.48262		5.33675	10.0705	7.50717	7.32763	15.1009	18.5059	5.91759	4.52816	5.94911	11.3959	6.92272	4.64466	4.48262
-5.08442	-6.08975	-18.5571	-6.41149	-7.29301	-7.15406	-8.78901	-16.4927	-11.5029	-7.79309	-6.47317	-4.02936	-6.55837		5.08442	6.08975	18.5571	6.41149	7.29301	7.15406	8.78901	16.4927	11.5029	7.79309	6.47317	4.02936	6.55837
-6.99116	-20.1794	-7.99865	-7.20442	-10.2851	-12.0407	-6.47778	-8.86464	-5.52128	-8.27834	-6.6921	-9.09358	-5.03251		6.99116	20.1794	7.99865	7.20442	10.2851	12.0407	6.47778	8.86464	5.52128	8.27834	6.6921	9.09358	5.03251
-5.94116	-7.11765	-8.30983	-10.6833	-11.3873	-9.60062	-25.5219	-8.62129	-13.6388	-16.1477	-12.0859	-5.00184	-5.15461		5.94116	7.11765	8.30983	10.6833	11.3873	9.60062	25.5219	8.62129	13.6388	16.1477	12.0859	5.00184	5.15461
-6.29785	-13.2767	-8.18912	-11.2927	-11.8826	-8.26199	-4.77354	-5.99738	-7.7177	-6.68494	-10.6726	-20.9886	-4.85009		6.29785	13.2767	8.18912	11.2927	11.8826	8.26199	4.77354	5.99738	7.7177	6.68494	10.6726	20.9886	4.85009
-5.48646	-12.7819	-10.2069	-6.04368	-31.7822	-10.2783	-6.17867	-8.13377	-13.5158	-4.54864	-7.54579	-7.19149	-6.86569		5.48646	12.7819	10.2069	6.04368	31.7822	10.2783	6.17867	8.13377	13.5158	4.54864	7.54579	7.19149	6.86569
-6.65987	-10.1448	-8.37698	-7.20322	-6.28804	-8.69725	-6.91146	-4.71599	-8.81579	-4.42566	-18.4315	-5.29588	-9.67535		6.65987	10.1448	8.37698	7.20322	6.28804	8.69725	6.91146	4.71599	8.81579	4.42566	18.4315	5.29588	9.67535
-5.13534	-12.7651	-7.15765	-6.16546	-6.181	-11.1401	-6.36293	-4.83838	-12.661	-12.9072	-9.07916	-9.19067	-10.8353		5.13534	12.7651	7.15765	6.16546	6.181	11.1401	6.36293	4.83838	12.661	12.9072	9.07916	9.19067	10.8353
-6.92574	-5.17913	-5.20454	-8.6642	-13.8808	-9.12656	-4.95969	-7.89358	-23.9523	-11.6794	-17.3224	-8.0308	-5.95261		6.92574	5.17913	5.20454	8.6642	13.8808	9.12656	4.95969	7.89358	23.9523	11.6794	17.3224	8.0308	5.95261
-12.2555	-11.4544	-5.44972	-7.80968	-6.826	-6.80951	-4.6547	-15.1593	-15.6512	-6.18004	-11.0448	-4.49052	-4.61002		12.2555	11.4544	5.44972	7.80968	6.826	6.80951	4.6547	15.1593	15.6512	6.18004	11.0448	4.49052	4.61002
-6.91039	-10.171	-9.78325	-13.0585	-9.03659	-5.40864	-5.57291	-10.7042	-4.60387	-4.70852	-6.58561	-5.95051	-16.6952		6.91039	10.171	9.78325	13.0585	9.03659	5.40864	5.57291	10.7042	4.60387	4.70852	6.58561	5.95051	16.6952
-5.99457	-5.04374	-12.4689	-8.84664	-11.1808	-8.39985	-10.4585	-6.06635	-4.72576	-8.54481	-15.0533	-9.85303	-5.70912		5.99457	5.04374	12.4689	8.84664	11.1808	8.39985	10.4585	6.06635	4.72576	8.54481	15.0533	9.85303	5.70912
-6.87113	-5.95921	-5.44991	-8.48038	-37.697	-6.69118	-12.476	-15.8337	-20.4728	-6.02729	-9.48207	-25.7216	-4.30532		6.87113	5.95921	5.44991	8.48038	37.697	6.69118	12.476	15.8337	20.4728	6.02729	9.48207	25.7216	4.30532
-10.5835	-5.28779	-6.91498	-7.80885	-7.97416	-6.63435	-6.6184	-5.94631	-5.21392	-5.05014	-10.2537	-6.55603	-5.16065		10.5835	5.28779	6.91498	7.80885	7.97416	6.63435	6.6184	5.94631	5.21392	5.05014	10.2537	6.55603	5.16065
-5.03822	-9.5584	-20.7107	-7.56466	-6.26887	-11.5826	-5.2794	-4.72982	-17.604	-14.9212	-8.59525	-12.7094	-7.60308		5.03822	9.5584	20.7107	7.56466	6.26887	11.5826	5.2794	4.72982	17.604	14.9212	8.59525	12.7094	7.60308
-7.4561	-12.0607	-6.97883	-6.83216	-10.1754	-5.54236	-5.15742	-22.0041	-5.64112	-9.42264	-7.47274	-22.5259	-4.6734		7.4561	12.0607	6.97883	6.83216	10.1754	5.54236	5.15742	22.0041	5.64112	9.42264	7.47274	22.5259	4.6734
-7.15032	-16.0874	-8.62818	-9.08907	-12.0104	-22.6348	-9.61373	-7.05279	-7.22767	-6.85631	-7.38683	-13.5405	-4.24617		7.15032	16.0874	8.62818	9.08907	12.0104	22.6348	9.61373	7.05279	7.22767	6.85631	7.38683	13.5405	4.24617
-5.07475	-5.89433	-8.01847	-6.09741	-7.37488	-5.72844	-6.92844	-5.83487	-4.72523	-18.7578	-12.2388	-4.3231	-5.34541		5.07475	5.89433	8.01847	6.09741	7.37488	5.72844	6.92844	5.83487	4.72523	18.7578	12.2388	4.3231	5.34541
-6.7834	-5.64541	-5.39722	-7.68432	-16.2265	-6.21708	-6.31828	-14.8687	-5.70172	-7.70759	-11.4793	-5.17553	-5.95594		6.7834	5.64541	5.39722	7.68432	16.2265	6.21708	6.31828	14.8687	5.70172	7.70759	11.4793	5.17553	5.95594
-5.86742	-5.51717	-8.38802	-9.02631	-7.0758	-5.62491	-7.60279	-5.96083	-5.64065	-7.82775	-6.42621	-4.0115	-7.66549		5.86742	5.51717	8.38802	9.02631	7.0758	5.62491	7.60279	5.96083	5.64065	7.82775	6.42621	4.0115	7.66549
-13.0069	-6.1734	-7.83972	-5.97454	-12.3756	-9.22702	-5.9554	-15.2994	-4.78605	-5.25649	-16.978	-8.58794	-22.1311		13.0069	6.1734	7.83972	5.97454	12.3756	9.22702	5.9554	15.2994	4.78605	5.25649	16.978	8.58794	22.1311
-6.04763	-5.99023	-6.13096	-15.5562	-11.6011	-10.5745	-13.7073	-5.22973	-9.11952	-4.15003	-8.56101	-10.718	-5.225		6.04763	5.99023	6.13096	15.5562	11.6011	10.5745	13.7073	5.22973	9.11952	4.15003	8.56101	10.718	5.225
-5.57797	-8.0035	-8.69461	-7.74357	-8.52555	-7.16281	-12.2432	-10.0538	-10.7064	-4.20763	-9.48555	-10.4729	-20.8521		5.57797	8.0035	8.69461	7.74357	8.52555	7.16281	12.2432	10.0538	10.7064	4.20763	9.48555	10.4729	20.8521
-9.78572	-5.92823	-10.9591	-13.053	-6.46344	-13.7587	-7.11838	-4.62481	-7.65454	-9.81211	-6.49559	-13.4003	-22.1955		9.78572	5.92823	10.9591	13.053	6.46344	13.7587	7.11838	4.62481	7.65454	9.81211	6.49559	13.4003	22.1955
-5.79952	-5.68289	-5.28341	-9.2686	-30.4009	-8.02714	-8.83173	-19.8234	-13.2696	-6.69872	-16.0191	-8.69908	-20.4256		5.79952	5.68289	5.28341	9.2686	30.4009	8.02714	8.83173	19.8234	13.2696	6.69872	16.0191	8.69908	20.4256
-5.3037	-8.7304	-5.77422	-20.7427	-6.29805	-9.8027	-8.71021	-13.9072	-6.12839	-8.9413	-10.0478	-4.67061	-5.23086		5.3037	8.7304	5.77422	20.7427	6.29805	9.8027	8.71021	13.9072	6.12839	8.9413	10.0478	4.67061	5.23086
-5.98036	-6.59409	-6.69045	-5.91108	-6.26048	-35.0113	-8.22214	-6.58647	-4.60233	-11.6231	-7.0766	-4.73055	-15.2421		5.98036	6.59409	6.69045	5.91108	6.26048	35.0113	8.22214	6.58647	4.60233	11.6231	7.0766	4.73055	15.2421
-5.12648	-6.28884	-11.271	-10.244	-8.64788	-7.66996	-5.23155	-8.23499	-5.45676	-5.4582	-6.47246	-6.56106	-24.2144		5.12648	6.28884	11.271	10.244	8.64788	7.66996	5.23155	8.23499	5.45676	5.4582	6.47246	6.56106	24.2144
-35.5257	-11.0404	-6.87856	-7.98531	-6.14621	-5.47274	-5.47708	-6.95344	-5.33467	-8.01633	-7.11272	-11.8705	-6.2702		35.5257	11.0404	6.87856	7.98531	6.14621	5.47274	5.47708	6.95344	5.33467	8.01633	7.11272	11.8705	6.2702
-5.21248	-5.84606	-11.0925	-6.39839	-13.351	-6.81739	-5.23645	-13.0577	-17.7246	-6.7213	-7.24394	-5.03413	-6.0877		5.21248	5.84606	11.0925	6.39839	13.351	6.81739	5.23645	13.0577	17.7246	6.7213	7.24394	5.03413	6.0877
-9.30343	-6.2079	-10.483	-6.15424	-15.7961	-24.5795	-4.6874	-10.8621	-10.7054	-18.0051	-6.76322	-4.05751	-6.69874		9.30343	6.2079	10.483	6.15424	15.7961	24.5795	4.6874	10.8621	10.7054	18.0051	6.76322	4.05751	6.69874
-6.61964	-19.9359	-10.6681	-8.3515	-7.37696	-5.84427	-11.2845	-7.62738	-6.67666	-6.33463	-8.66757	-13.7616	-7.43183		6.61964	19.9359	10.6681	8.3515	7.37696	5.84427	11.2845	7.62738	6.67666	6.33463	8.66757	13.7616	7.43183
-9.55132	-6.67985	-16.5293	-13.4174	-15.695	-29.7715	-12.2802	-8.42118	-5.27258	-5.17218	-16.5449	-5.58219	-23.79		9.55132	6.67985	16.5293	13.4174	15.695	29.7715	12.2802	8.42118	5.27258	5.17218	16.5449	5.58219	23.79
-6.87104	-14.8512	-13.8466	-11.3422	-12.7681	-5.1134	-9.5504	-10.3754	-7.89675	-7.24714	-6.05595	-9.30449	-5.23582		6.87104	14.8512	13.8466	11.3422	12.7681	5.1134	9.5504	10.3754	7.89675	7.24714	6.05595	9.30449	5.23582
-7.36466	-5.0244	-5.00221	-7.06952	-10.2063	-6.70192	-4.91599	-14.1632	-4.78396	-5.16569	-12.2891	-6.86299	-24.3399		7.36466	5.0244	5.00221	7.06952	10.2063	6.70192	4.91599	14.1632	4.78396	5.16569	12.2891	6.86299	24.3399
-5.29214	-5.02985	-13.4262	-10.5484	-20.8357	-6.27616	-7.67159	-24.2952	-5.15015	-8.75525	-10.3415	-5.45738	-11.5225		5.29214	5.02985	13.4262	10.5484	20.8357	6.27616	7.67159	24.2952	5.15015	8.75525	10.3415	5.45738	11.5225
-9.81164	-7.16564	-9.64385	-7.1304	-10.7672	-11.5891	-5.35477	-11.0529	-6.00465	-21.3839	-6.19515	-7.28801	-6.33481		9.81164	7.16564	9.64385	7.1304	10.7672	11.5891	5.35477	11.0529	6.00465	21.3839	6.19515	7.28801	6.33481
-8.39434	-5.4566	-5.2495	-22.3892	-6.25109	-7.68307	-5.04999	-12.7621	-7.46947	-4.17181	-6.07698	-25.8425	-6.7624		8.39434	5.4566	5.2495	22.3892	6.25109	7.68307	5.04999	12.7621	7.46947	4.17181	6.07698	25.8425	6.7624
-5.84926	-5.08773	-6.83663	-7.67935	-5.90778	-6.4632	-9.14497	-11.9161	-15.8922	-4.96514	-6.32137	-4.9679	-8.22732		5.84926	5.08773	6.83663	7.67935	5.90778	6.4632	9.14497	11.9161	15.8922	4.96514	6.32137	4.9679	8.22732
-5.93346	-6.36938	-10.5622	-6.64155	-6.34647	-11.351	-7.49947	-5.62968	-5.1498	-4.5375	-8.96895	-14.0001	-7.37393		5.93346	6.36938	10.5622	6.64155	6.34647	11.351	7.49947	5.62968	5.1498	4.5375	8.96895	14.0001	7.37393
-6.05591	-6.66948	-6.77935	-6.27468	-21.0093	-5.79927	-5.0582	-7.15584	-7.83526	-5.51055	-10.8648	-4.78227	-21.7177		6.05591	6.66948	6.77935	6.27468	21.0093	5.79927	5.0582	7.15584	7.83526	5.51055	10.8648	4.78227	21.7177
-6.42533	-5.32642	-7.64691	-6.57984	-13.1992	-10.9307	-6.21976	-8.68297	-5.21056	-7.81951	-16.3103	-4.35412	-6.2148		6.42533	5.32642	7.64691	6.57984	13.1992	10.9307	6.21976	8.68297	5.21056	7.81951	16.3103	4.35412	6.2148
-5.14413	-21.6801	-8.01537	-7.25112	-6.97763	-23.6883	-18.428	-8.74829	-7.65189	-18.2533	-9.77866	-22.2973	-12.3185		5.14413	21.6801	8.01537	7.25112	6.97763	23.6883	18.428	8.74829	7.65189	18.2533	9.77866	22.2973	12.3185
-5.32746	-5.01487	-9.42093	-7.80031	-6.91677	-16.7363	-8.84826	-4.66009	-5.39359	-7.08323	-8.11172	-6.42682	-6.52254		5.32746	5.01487	9.42093	7.80031	6.91677	16.7363	8.84826	4.66009	5.39359	7.08323	8.11172	6.42682	6.52254
-5.02289	-5.13683	-6.79701	-7.49412	-9.72651	-6.11627	-5.19859	-8.26511	-4.66098	-7.25645	-10.8262	-4.96176	-7.86573		5.02289	5.13683	6.79701	7.49412	9.72651	6.11627	5.19859	8.26511	4.66098	7.25645	10.8262	4.96176	7.86573
-15.3054	-8.36316	-25.1691	-6.21237	-14.6713	-11.0032	-5.56583	-5.45831	-6.79718	-7.6836	-9.99956	-11.9758	-5.73014		15.3054	8.36316	25.1691	6.21237	14.6713	11.0032	5.56583	5.45831	6.79718	7.6836	9.99956	11.9758	5.73014
-5.37431	-7.04406	-8.26274	-6.63962	-11.2578	-19.7353	-5.63725	-15.5301	-8.68896	-7.80047	-16.4464	-5.25385	-4.0822		5.37431	7.04406	8.26274	6.63962	11.2578	19.7353	5.63725	15.5301	8.68896	7.80047	16.4464	5.25385	4.0822
-6.00906	-8.13049	-5.51645	-6.2734	-28.2285	-9.48549	-9.78791	-12.2973	-5.57608	-10.5438	-6.98709	-5.86166	-4.2043		6.00906	8.13049	5.51645	6.2734	28.2285	9.48549	9.78791	12.2973	5.57608	10.5438	6.98709	5.86166	4.2043
-6.32233	-11.2401	-7.28705	-8.65368	-6.56701	-11.378	-15.8358	-9.18557	-12.6556	-5.47617	-9.97847	-11.9634	-5.85316		6.32233	11.2401	7.28705	8.65368	6.56701	11.378	15.8358	9.18557	12.6556	5.47617	9.97847	11.9634	5.85316
-5.40749	-7.14519	-5.63976	-29.0394	-5.80887	-6.25169	-17.7895	-14.8621	-27.9141	-5.22889	-6.31865	-5.24617	-4.14606		5.40749	7.14519	5.63976	29.0394	5.80887	6.25169	17.7895	14.8621	27.9141	5.22889	6.31865	5.24617	4.14606
-7.02709	-8.34971	-10.1592	-17.9918	-8.4985	-5.58088	-17.9134	-11.5053	-5.81907	-4.41772	-8.41045	-5.4837	-4.39088		7.02709	8.34971	10.1592	17.9918	8.4985	5.58088	17.9134	11.5053	5.81907	4.41772	8.41045	5.4837	4.39088
-5.68516	-6.82272	-24.625	-9.69071	-19.066	-9.61029	-19.0181	-22.3087	-12.4719	-4.41757	-7.89321	-5.11446	-17.5136		5.68516	6.82272	24.625	9.69071	19.066	9.61029	19.0181	22.3087	12.4719	4.41757	7.89321	5.11446	17.5136
-7.11653	-9.38152	-6.19424	-20.5549	-6.56603	-15.1653	-6.01814	-5.21892	-18.026	-15.3388	-12.483	-5.10727	-17.026		7.11653	9.38152	6.19424	20.5549	6.56603	15.1653	6.01814	5.21892	18.026	15.3388	12.483	5.10727	17.026
-5.66026	-5.84139	-5.53195	-7.98044	-7.24284	-6.01015	-15.6051	-7.0506	-7.10071	-4.5935	-6.75362	-4.43578	-6.28514		5.66026	5.84139	5.53195	7.98044	7.24284	6.01015	15.6051	7.0506	7.10071	4.5935	6.75362	4.43578	6.28514
-5.61067	-16.0754	-13.0414	-5.90457	-10.3621	-12.4813	-8.22174	-9.3704	-11.2509	-4.10006	-22.6256	-9.31003	-5.55288		5.61067	16.0754	13.0414	5.90457	10.3621	12.4813	8.22174	9.3704	11.2509	4.10006	22.6256	9.31003	5.55288
-5.18366	-5.80759	-5.96271	-9.68834	-6.27932	-6.26668	-5.90257	-4.67361	-13.3869	-6.17267	-8.89822	-11.0096	-6.10251		5.18366	5.80759	5.96271	9.68834	6.27932	6.26668	5.90257	4.67361	13.3869	6.17267	8.89822	11.0096	6.10251
-5.123	-12.395	-5.77964	-6.81942	-7.62573	-6.8172	-8.47315	-5.89662	-23.6405	-8.49168	-6.33732	-5.20856	-10.4971		5.123	12.395	5.77964	6.81942	7.62573	6.8172	8.47315	5.89662	23.6405	8.49168	6.33732	5.20856	10.4971
-5.40707	-5.92514	-5.41651	-37.9473	-9.21752	-10.9068	-6.09319	-4.79807	-4.5974	-16.6049	-19.2791	-4.10954	-9.39986		5.40707	5.92514	5.41651	37.9473	9.21752	10.9068	6.09319	4.79807	4.5974	16.6049	19.2791	4.10954	9.39986
-5.45441	-6.47352	-21.8968	-8.28383	-8.60779	-13.234	-4.75054	-7.97862	-10.8229	-7.08055	-10.124	-8.07429	-4.21328		5.45441	6.47352	21.8968	8.28383	8.60779	13.234	4.75054	7.97862	10.8229	7.08055	10.124	8.07429	4.21328
-7.80189	-5.19174	-38.927	-6.75779	-11.0108	-11.4043	-4.81333	-5.72064	-4.53625	-10.4261	-14.7634	-7.2802	-4.45743		7.80189	5.19174	38.927	6.75779	11.0108	11.4043	4.81333	5.72064	4.53625	10.4261	14.7634	7.2802	4.45743
-5.60592	-5.79152	-16.2831	-11.4574	-7.10484	-19.5325	-12.3287	-12.9235	-7.03847	-20.6151	-9.14815	-7.03429	-4.57951		5.60592	5.79152	16.2831	11.4574	7.10484	19.5325	12.3287	12.9235	7.03847	20.6151	9.14815	7.03429	4.57951
-14.6178	-5.11116	-10.3028	-36.1136	-6.87087	-5.00617	-15.8189	-8.34597	-4.8412	-14.9268	-8.11061	-5.26087	-5.8618		14.6178	5.11116	10.3028	36.1136	6.87087	5.00617	15.8189	8.34597	4.8412	14.9268	8.11061	5.26087	5.8618
-6.03314	-5.2332	-8.59563	-25.8596	-7.85064	-12.1494	-6.05413	-9.81391	-4.536	-15.5364	-10.1251	-5.56325	-9.15773		6.03314	5.2332	8.59563	25.8596	7.85064	12.1494	6.05413	9.81391	4.536	15.5364	10.1251	5.56325	9.15773
-6.04311	-9.16631	-5.91606	-11.0883	-9.86539	-8.30649	-5.32251	-13.9059	-5.69564	-10.2191	-12.5668	-8.49008	-15.384		6.04311	9.16631	5.91606	11.0883	9.86539	8.30649	5.32251	13.9059	5.69564	10.2191	12.5668	8.49008	15.384
-5.67735	-5.50411	-8.05238	-13.8947	-5.83901	-18.8663	-6.18964	-4.99485	-4.78003	-7.82043	-11.7127	-9.28296	-30.2156		5.67735	5.50411	8.05238	13.8947	5.83901	18.8663	6.18964	4.99485	4.78003	7.82043	11.7127	9.28296	30.2156
-10.5983	-7.09051	-11.472	-6.50944	-7.67099	-7.14777	-6.37751	-9.69524	-4.84106	-7.26466	-48.9442	-4.88736	-6.04602		10.5983	7.09051	11.472	6.50944	7.67099	7.14777	6.37751	9.69524	4.84106	7.26466	48.9442	4.88736	6.04602
-5.05195	-7.14661	-5.0646	-14.0165	-6.63399	-10.5679	-17.1201	-4.63441	-5.69541	-5.71112	-13.4218	-4.63499	-6.84116		5.05195	7.14661	5.0646	14.0165	6.63399	10.5679	17.1201	4.63441	5.69541	5.71112	13.4218	4.63499	6.84116
-5.47934	-5.13232	-15.8743	-9.13337	-5.8419	-20.8221	-8.63684	-12.8748	-5.93949	-4.05942	-8.234	-25.3249	-8.91771		5.47934	5.13232	15.8743	9.13337	5.8419	20.8221	8.63684	12.8748	5.93949	4.05942	8.234	25.3249	8.91771
-10.067	-9.28022	-11.6691	-7.66737	-13.6549	-20.7636	-4.54807	-4.51592	-4.90174	-9.55245	-10.1264	-18.6698	-5.25654		10.067	9.28022	11.6691	7.66737	13.6549	20.7636	4.54807	4.51592	4.90174	9.55245	10.1264	18.6698	5.25654
-6.18593	-5.1297	-6.11882	-15.3577	-12.8441	-11.1946	-4.79436	-5.06595	-11.7985	-4.28835	-6.09848	-5.42491	-19.8451		6.18593	5.1297	6.11882	15.3577	12.8441	11.1946	4.79436	5.06595	11.7985	4.28835	6.09848	5.42491	19.8451
-7.51584	-14.5741	-21.9881	-11.0843	-6.61909	-8.14434	-5.24137	-5.00642	-6.00007	-6.60604	-7.0145	-13.725	-4.34303		7.51584	14.5741	21.9881	11.0843	6.61909	8.14434	5.24137	5.00642	6.00007	6.60604	7.0145	13.725	4.34303
-8.82499	-5.41716	-7.89032	-5.83512	-6.7416	-7.71941	-17.7036	-5.43396	-31.8788	-8.85476	-6.89297	-5.17905	-6.72364		8.82499	5.41716	7.89032	5.83512	6.7416	7.71941	17.7036	5.43396	31.8788	8.85476	6.89297	5.17905	6.72364
-5.52978	-5.291	-7.0982	-6.68902	-6.46405	-17.7904	-15.6385	-5.98358	-4.59596	-4.08269	-7.0769	-4.07812	-12.0949		5.52978	5.291	7.0982	6.68902	6.46405	17.7904	15.6385	5.98358	4.59596	4.08269	7.0769	4.07812	12.0949
-10.4324	-5.29095	-7.40391	-10.29	-25.3931	-5.3459	-6.66713	-5.98362	-4.65683	-6.09432	-8.66512	-19.5759	-5.19804		10.4324	5.29095	7.40391	10.29	25.3931	5.3459	6.66713	5.98362	4.65683	6.09432	8.66512	19.5759	5.19804
-5.56443	-11.4553	-5.87884	-6.32192	-7.75718	-5.40897	-4.5921	-9.95195	-11.3094	-8.32567	-10.13	-4.67856	-6.90724		5.56443	11.4553	5.87884	6.32192	7.75718	5.40897	4.5921	9.95195	11.3094	8.32567	10.13	4.67856	6.90724
-7.52077	-5.83435	-6.61331	-15.2327	-7.46313	-8.46111	-11.1306	-7.14604	-12.0418	-15.5222	-20.2624	-4.18735	-7.57902		7.52077	5.83435	6.61331	15.2327	7.46313	8.46111	11.1306	7.14604	12.0418	15.5222	20.2624	4.18735	7.57902
-5.75152	-5.58709	-5.27326	-10.4107	-7.60276	-7.12157	-5.03155	-9.77081	-5.57206	-11.3103	-8.23851	-6.80511	-5.07661		5.75152	5.58709	5.27326	10.4107	7.60276	7.12157	5.03155	9.77081	5.57206	11.3103	8.23851	6.80511	5.07661
-7.8267	-5.28032	-5.45651	-6.26031	-21.3972	-13.2255	-6.13509	-5.07132	-4.53445	-4.7777	-12.5121	-5.09484	-17.8333		7.8267	5.28032	5.45651	6.26031	21.3972	13.2255	6.13509	5.07132	4.53445	4.7777	12.5121	5.09484	17.8333
-5.62926	-11.3723	-23.1616	-8.15236	-5.97952	-15.7296	-5.83568	-4.76669	-7.76913	-5.38524	-13.3056	-4.1182	-12.8907		5.62926	11.3723	23.1616	8.15236	5.97952	15.7296	5.83568	4.76669	7.76913	5.38524	13.3056	4.1182	12.8907
-6.05426	-5.43596	-11.1995	-7.17572	-5.85944	-8.0406	-5.53991	-25.4577	-5.44919	-6.10888	-11.719	-4.72286	-5.14083		6.05426	5.43596	11.1995	7.17572	5.85944	8.0406	5.53991	25.4577	5.44919	6.10888	11.719	4.72286	5.14083
-6.17624	-6.69852	-8.21228	-6.62639	-11.0543	-5.78645	-4.50266	-4.95031	-13.994	-5.73157	-13.4891	-5.5144	-9.65869		6.17624	6.69852	8.21228	6.62639	11.0543	5.78645	4.50266	4.95031	13.994	5.73157	13.4891	5.5144	9.65869
-5.29713	-9.86793	-6.2619	-6.50422	-9.96248	-9.81594	-9.56874	-5.86646	-13.1389	-9.33129	-6.40907	-7.34373	-5.9356		5.29713	9.86793	6.2619	6.50422	9.96248	9.81594	9.56874	5.86646	13.1389	9.33129	6.40907	7.34373	5.9356
-5.71432	-11.454	-28.9688	-15.7202	-7.52182	-10.7929	-6.3478	-8.18853	-10.6973	-9.99511	-10.1324	-4.4053	-4.83703		5.71432	11.454	28.9688	15.7202	7.52182	10.7929	6.3478	8.18853	10.6973	9.99511	10.1324	4.4053	4.83703
-5.16331	-9.49983	-8.82771	-7.78528	-5.81942	-9.21842	-4.64388	-25.4032	-12.9555	-11.6906	-17.6409	-25.704	-4.16565		5.16331	9.49983	8.82771	7.78528	5.81942	9.21842	4.64388	25.4032	12.9555	11.6906	17.6409	25.704	4.16565
-6.65639	-8.57699	-5.35689	-8.57859	-6.31511	-5.25639	-7.03547	-16.7363	-8.683	-8.75955	-17.4582	-4.63972	-11.8563		6.65639	8.57699	5.35689	8.57859	6.31511	5.25639	7.03547	16.7363	8.683	8.75955	17.4582	4.63972	11.8563
-6.40031	-5.89033	-7.49395	-7.72402	-6.86956	-16.9162	-32.564	-9.23134	-5.32599	-5.76513	-8.05921	-12.079	-6.11963		6.40031	5.89033	7.49395	7.72402	6.86956	16.9162	32.564	9.23134	5.32599	5.76513	8.05921	12.079	6.11963
-6.13511	-13.307	-12.1337	-6.62518	-9.01584	-19.6098	-19.9956	-7.64681	-4.89874	-9.30491	-6.41185	-4.56333	-10.148		6.13511	13.307	12.1337	6.62518	9.01584	19.6098	19.9956	7.64681	4.89874	9.30491	6.41185	4.56333	10.148
-6.72404	-6.70251	-14.6981	-10.1041	-13.3685	-7.52968	-5.90122	-9.78454	-10.3912	-6.92237	-12.8207	-6.44649	-5.69571		6.72404	6.70251	14.6981	10.1041	13.3685	7.52968	5.90122	9.78454	10.3912	6.92237	12.8207	6.44649	5.69571
-11.7513	-5.05448	-6.2789	-7.05175	-22.1478	-5.02894	-4.80746	-9.90721	-7.03417	-8.14224	-8.24311	-6.93106	-6.97867		11.7513	5.05448	6.2789	7.05175	22.1478	5.02894	4.80746	9.90721	7.03417	8.14224	8.24311	6.93106	6.97867
-5.32148	-5.05445	-24.2254	-7.47882	-10.6206	-5.04165	-7.37479	-6.4291	-4.83678	-7.64646	-11.7223	-14.6816	-6.491		5.32148	5.05445	24.2254	7.47882	10.6206	5.04165	7.37479	6.4291	4.83678	7.64646	11.7223	14.6816	6.491
-7.38694	-5.89915	-11.5915	-7.78398	-11.4148	-16.0919	-8.54048	-6.4924	-14.9074	-10.1445	-14.3469	-4.24372	-21.9947		7.38694	5.89915	11.5915	7.78398	11.4148	16.0919	8.54048	6.4924	14.9074	10.1445	14.3469	4.24372	21.9947
-5.59439	-7.35544	-13.4915	-7.05148	-8.6075	-5.71678	-4.87858	-14.3662	-7.76628	-5.62708	-13.7374	-4.22901	-7.4684		5.59439	7.35544	13.4915	7.05148	8.6075	5.71678	4.87858	14.3662	7.76628	5.62708	13.7374	4.22901	7.4684
-5.04496	-12.543	-12.6984	-15.5957	-10.139	-7.18374	-6.40478	-37.8038	-14.4189	-4.5178	-15.2022	-4.90036	-12.2297		5.04496	12.543	12.6984	15.5957	10.139	7.18374	6.40478	37.8038	14.4189	4.5178	15.2022	4.90036	12.2297
-7.16646	-9.67301	-13.6147	-22.4315	-9.59351	-7.12303	-6.34385	-4.72323	-5.75184	-4.99628	-11.6625	-4.40651	-6.55349		7.16646	9.67301	13.6147	22.4315	9.59351	7.12303	6.34385	4.72323	5.75184	4.99628	11.6625	4.40651	6.55349
-5.32272	-9.15433	-6.04738	-7.11165	-5.99693	-5.11117	-12.0273	-5.70091	-16.677	-7.42614	-9.16128	-10.3851	-7.10458		5.32272	9.15433	6.04738	7.11165	5.99693	5.11117	12.0273	5.70091	16.677	7.42614	9.16128	10.3851	7.10458
-5.87195	-8.97007	-5.56358	-9.0037	-18.1494	-8.95802	-5.86365	-4.66613	-7.94888	-12.8504	-12.0913	-13.375	-7.47111		5.87195	8.97007	5.56358	9.0037	18.1494	8.95802	5.86365	4.66613	7.94888	12.8504	12.0913	13.375	7.47111
-5.32255	-5.30118	-5.25846	-6.44004	-6.07864	-9.44638	-14.7776	-5.45984	-5.2633	-5.70327	-20.1483	-4.33922	-7.59435		5.32255	5.30118	5.25846	6.44004	6.07864	9.44638	14.7776	5.45984	5.2633	5.70327	20.1483	4.33922	7.59435
-5.44457	-5.59519	-27.1711	-8.33211	-6.04028	-6.39482	-21.4936	-5.03267	-4.89701	-8.62947	-14.4112	-10.9889	-16.3228		5.44457	5.59519	27.1711	8.33211	6.04028	6.39482	21.4936	5.03267	4.89701	8.62947	14.4112	10.9889	16.3228
-5.25188	-6.38599	-5.44498	-13.3366	-6.06429	-13.9655	-5.56369	-6.31652	-5.20177	-5.62306	-10.4456	-4.09149	-4.78879		5.25188	6.38599	5.44498	13.3366	6.06429	13.9655	5.56369	6.31652	5.20177	5.62306	10.4456	4.09149	4.78879
-7.15926	-6.2591	-5.14206	-6.92771	-13.7099	-5.48266	-12.766	-6.25809	-13.0142	-6.35388	-42.8554	-23.9258	-5.58301		7.15926	6.2591	5.14206	6.92771	13.7099	5.48266	12.766	6.25809	13.0142	6.35388	42.8554	23.9258	5.58301
-5.12405	-6.11675	-11.7384	-12.0545	-5.83691	-7.68466	-4.52642	-12.7284	-8.86372	-4.27253	-6.90577	-6.65239	-4.85129		5.12405	6.11675	11.7384	12.0545	5.83691	7.68466	4.52642	12.7284	8.86372	4.27253	6.90577	6.65239	4.85129
-10.7924	-5.87256	-9.6086	-14.4346	-10.3229	-15.0092	-5.99801	-6.25919	-28.822	-5.00489	-10.3238	-5.17835	-4.05784		10.7924	5.87256	9.6086	14.4346	10.3229	15.0092	5.99801	6.25919	28.822	5.00489	10.3238	5.17835	4.05784
-5.78736	-6.53624	-7.59461	-9.00173	-7.33568	-25.0871	-4.89978	-14.2562	-9.35166	-27.3361	-17.9532	-4.87314	-33.478		5.78736	6.53624	7.59461	9.00173	7.33568	25.0871	4.89978	14.2562	9.35166	27.3361	17.9532	4.87314	33.478
-7.31251	-6.6578	-6.67995	-9.42711	-8.19151	-5.92279	-4.90326	-21.5218	-4.95671	-7.07093	-15.3898	-5.17087	-16.451		7.31251	6.6578	6.67995	9.42711	8.19151	5.92279	4.90326	21.5218	4.95671	7.07093	15.3898	5.17087	16.451
-5.84654	-5.07079	-6.49926	-9.0606	-7.35827	-8.49178	-4.59915	-11.0245	-14.295	-5.48047	-11.4835	-10.3566	-13.2171		5.84654	5.07079	6.49926	9.0606	7.35827	8.49178	4.59915	11.0245	14.295	5.48047	11.4835	10.3566	13.2171
-5.84647	-17.0162	-9.24823	-14.0044	-11.8836	-7.58355	-4.96548	-6.50823	-9.35108	-22.8075	-6.17386	-5.16737	-24.5699		5.84647	17.0162	9.24823	14.0044	11.8836	7.58355	4.96548	6.50823	9.35108	22.8075	6.17386	5.16737	24.5699
-7.27707	-5.23626	-9.4318	-7.96159	-14.5834	-5.57617	-8.81224	-10.5371	-11.8534	-10.1095	-16.3057	-7.29799	-5.4058		7.27707	5.23626	9.4318	7.96159	14.5834	5.57617	8.81224	10.5371	11.8534	10.1095	16.3057	7.29799	5.4058
-5.75105	-5.05313	-8.54958	-7.1067	-8.23949	-5.27152	-9.60616	-6.2647	-8.00807	-4.60332	-8.92058	-5.95403	-13.2193		5.75105	5.05313	8.54958	7.1067	8.23949	5.27152	9.60616	6.2647	8.00807	4.60332	8.92058	5.95403	13.2193
-6.98054	-7.18798	-7.93742	-6.49606	-11.2984	-72.1057	-6.74034	-6.87517	-5.13928	-5.70001	-6.9066	-5.03774	-8.64248		6.98054	7.18798	7.93742	6.49606	11.2984	72.1057	6.74034	6.87517	5.13928	5.70001	6.9066	5.03774	8.64248
-5.02326	-5.46719	-6.17006	-39.2108	-21.6183	-7.89798	-4.85013	-7.85214	-19.3605	-4.47752	-16.5502	-4.42642	-6.81283		5.02326	5.46719	6.17006	39.2108	21.6183	7.89798	4.85013	7.85214	19.3605	4.47752	16.5502	4.42642	6.81283
-7.23997	-8.32808	-15.4428	-6.73979	-7.03296	-7.95971	-5.03861	-4.8004	-12.4024	-7.16297	-10.9964	-7.10937	-18.105		7.23997	8.32808	15.4428	6.73979	7.03296	7.95971	5.03861	4.8004	12.4024	7.16297	10.9964	7.10937	18.105
-5.83608	-14.0298	-11.6949	-16.6883	-12.1021	-10.1582	-4.55313	-6.14344	-6.1158	-5.6368	-11.2405	-6.79499	-10.1118		5.83608	14.0298	11.6949	16.6883	12.1021	10.1582	4.55313	6.14344	6.1158	5.6368	11.2405	6.79499	10.1118
-7.05261	-8.16417	-11.6326	-14.5518	-6.96038	-5.46078	-7.17986	-5.35014	-11.6089	-8.68529	-9.65364	-5.08596	-4.74215		7.05261	8.16417	11.6326	14.5518	6.96038	5.46078	7.17986	5.35014	11.6089	8.68529	9.65364	5.08596	4.74215
-8.58626	-7.9677	-5.44859	-5.94572	-17.8962	-9.00307	-8.76892	-4.80336	-5.07759	-4.64243	-12.8276	-6.97741	-11.5171		8.58626	7.9677	5.44859	5.94572	17.8962	9.00307	8.76892	4.80336	5.07759	4.64243	12.8276	6.97741	11.5171
-5.69783	-5.09897	-9.41467	-6.25041	-21.2308	-5.58549	-11.5171	-11.2149	-12.4627	-17.0852	-24.9736	-13.0725	-5.23054		5.69783	5.09897	9.41467	6.25041	21.2308	5.58549	11.5171	11.2149	12.4627	17.0852	24.9736	13.0725	5.23054
-6.54335	-5.15954	-8.3537	-17.8465	-14.7655	-9.73951	-17.7465	-10.5472	-7.82394	-7.54419	-9.41126	-9.34808	-7.24573		6.54335	5.15954	8.3537	17.8465	14.7655	9.73951	17.7465	10.5472	7.82394	7.54419	9.41126	9.34808	7.24573
-5.98171	-6.9295	-16.8364	-11.0094	-7.26316	-9.56244	-4.74764	-7.80136	-5.19934	-14.2501	-8.67899	-7.75442	-6.33195		5.98171	6.9295	16.8364	11.0094	7.26316	9.56244	4.74764	7.80136	5.19934	14.2501	8.67899	7.75442	6.33195
-5.63522	-16.0549	-5.47282	-9.11682	-7.40452	-16.6476	-20.0127	-8.77975	-5.01606	-6.06453	-9.83879	-4.69824	-36.9108		5.63522	16.0549	5.47282	9.11682	7.40452	16.6476	20.0127	8.77975	5.01606	6.06453	9.83879	4.69824	36.9108
-7.33832	-6.04043	-11.5113	-16.8682	-11.8665	-6.82185	-4.57236	-5.97262	-8.73868	-5.2066	-16.9808	-5.73173	-26.9631		7.33832	6.04043	11.5113	16.8682	11.8665	6.82185	4.57236	5.97262	8.73868	5.2066	16.9808	5.73173	26.9631
-15.3336	-7.56293	-9.67728	-6.98048	-8.43238	-6.45807	-18.3087	-4.63003	-5.07631	-4.58758	-25.4037	-5.84587	-12.9253		15.3336	7.56293	9.67728	6.98048	8.43238	6.45807	18.3087	4.63003	5.07631	4.58758	25.4037	5.84587	12.9253
-6.02878	-11.8446	-8.0744	-6.18701	-12.5177	-5.85027	-5.80227	-13.7858	-15.7572	-5.84617	-30.5308	-14.8091	-4.93063		6.02878	11.8446	8.0744	6.18701	12.5177	5.85027	5.80227	13.7858	15.7572	5.84617	30.5308	14.8091	4.93063
-5.17278	-11.5303	-5.17909	-22.4832	-6.07401	-9.453	-11.3007	-5.24152	-11.3623	-6.08551	-12.5865	-9.74102	-4.32046		5.17278	11.5303	5.17909	22.4832	6.07401	9.453	11.3007	5.24152	11.3623	6.08551	12.5865	9.74102	4.32046
-5.17272	-5.97082	-5.42308	-6.55293	-9.37348	-5.79279	-9.47419	-20.1954	-6.66228	-4.00317	-8.55827	-9.36942	-26.3553		5.17272	5.97082	5.42308	6.55293	9.37348	5.79279	9.47419	20.1954	6.66228	4.00317	8.55827	9.36942	26.3553
-8.92774	-14.6371	-5.45031	-7.83388	-8.64366	-5.49461	-5.93553	-5.24244	-12.3383	-5.34426	-26.2586	-8.08292	-16.8955		8.92774	14.6371	5.45031	7.83388	8.64366	5.49461	5.93553	5.24244	12.3383	5.34426	26.2586	8.08292	16.8955
-5.14342	-8.28713	-8.42983	-7.77281	-8.49015	-5.68326	-7.95035	-5.42684	-5.86858	-8.1449	-17.3475	-5.82318	-22.147		5.14342	8.28713	8.42983	7.77281	8.49015	5.68326	7.95035	5.42684	5.86858	8.1449	17.3475	5.82318	22.147
-10.4498	-18.6015	-10.5645	-11.3736	-9.669	-11.7298	-6.67649	-19.8315	-9.53009	-5.27435	-8.68129	-4.60242	-4.93593		10.4498	18.6015	10.5645	11.3736	9.669	11.7298	6.67649	19.8315	9.53009	5.27435	8.68129	4.60242	4.93593
-8.48792	-7.12671	-6.83624	-11.6174	-9.20157	-8.75067	-13.3327	-4.57358	-6.47783	-14.3018	-6.05707	-5.39053	-14.0305		8.48792	7.12671	6.83624	11.6174	9.20157	8.75067	13.3327	4.57358	6.47783	14.3018	6.05707	5.39053	14.0305
-6.03744	-7.72302	-12.8096	-6.36784	-9.93926	-8.81262	-5.34306	-10.067	-10.6282	-5.44876	-11.3061	-11.1878	-5.67099		6.03744	7.72302	12.8096	6.36784	9.93926	8.81262	5.34306	10.067	10.6282	5.44876	11.3061	11.1878	5.67099
-6.34246	-6.92816	-8.215	-9.78524	-20.5623	-10.9515	-5.77694	-9.88407	-15.5109	-8.49886	-14.1138	-17.6538	-4.87873		6.34246	6.92816	8.215	9.78524	20.5623	10.9515	5.77694	9.88407	15.5109	8.49886	14.1138	17.6538	4.87873
-7.01127	-11.9921	-5.70514	-24.1892	-18.0608	-5.58149	-10.2945	-5.00238	-8.55287	-4.8937	-10.8792	-8.49652	-13.851		7.01127	11.9921	5.70514	24.1892	18.0608	5.58149	10.2945	5.00238	8.55287	4.8937	10.8792	8.49652	13.851
-16.8095	-8.50149	-6.37639	-10.0285	-14.3549	-6.74378	-5.77869	-7.07774	-4.76843	-4.4024	-9.29238	-7.33372	-13.9731		16.8095	8.50149	6.37639	10.0285	14.3549	6.74378	5.77869	7.07774	4.76843	4.4024	9.29238	7.33372	13.9731
-6.96493	-9.66094	-7.27905	-6.91559	-6.84945	-19.2576	-7.1847	-5.43186	-14.3505	-4.27998	-9.59781	-7.45551	-6.16142		6.96493	9.66094	7.27905	6.91559	6.84945	19.2576	7.1847	5.43186	14.3505	4.27998	9.59781	7.45551	6.16142
-6.52144	-5.08324	-5.50892	-24.5547	-9.71939	-23.5313	-13.2896	-13.0637	-15.1438	-5.07102	-7.40084	-4.278	-4.63555		6.52144	5.08324	5.50892	24.5547	9.71939	23.5313	13.2896	13.0637	15.1438	5.07102	7.40084	4.278	4.63555
-5.98686	-7.15085	-16.7325	-5.93893	-11.2543	-32.8702	-7.49196	-5.317	-9.95575	-14.3394	-8.6218	-4.76096	-7.81078		5.98686	7.15085	16.7325	5.93893	11.2543	32.8702	7.49196	5.317	9.95575	14.3394	8.6218	4.76096	7.81078
-8.48262	-5.38076	-11.7176	-11.798	-14.3098	-7.48261	-10.6054	-8.92044	-7.14812	-5.66696	-9.9039	-7.80893	-5.92358		8.48262	5.38076	11.7176	11.798	14.3098	7.48261	10.6054	8.92044	7.14812	5.66696	9.9039	7.80893	5.92358
-8.60346	-5.10756	-42.108	-6.12171	-15.5946	-16.3347	-4.74623	-6.97054	-13.3737	-7.43275	-7.15754	-4.93815	-13.5538		8.60346	5.10756	42.108	6.12171	15.5946	16.3347	4.74623	6.97054	13.3737	7.43275	7.15754	4.93815	13.5538
-6.99886	-6.67219	-6.58288	-8.9292	-29.026	-9.13524	-16.3434	-11.1836	-5.86596	-4.00601	-6.91341	-9.81222	-5.00887		6.99886	6.67219	6.58288	8.9292	29.026	9.13524	16.3434	11.1836	5.86596	4.00601	6.91341	9.81222	5.00887
-8.74348	-5.51247	-6.33629	-7.76914	-12.7317	-9.39427	-5.66682	-5.08195	-5.92677	-4.85884	-10.2097	-4.49904	-6.90119		8.74348	5.51247	6.33629	7.76914	12.7317	9.39427	5.66682	5.08195	5.92677	4.85884	10.2097	4.49904	6.90119
-10.8065	-5.08089	-8.70798	-8.37885	-10.0563	-9.76059	-8.65912	-7.52527	-7.63561	-7.17716	-12.6511	-5.41394	-31.7434		10.8065	5.08089	8.70798	8.37885	10.0563	9.76059	8.65912	7.52527	7.63561	7.17716	12.6511	5.41394	31.7434
-15.0268	-15.3347	-5.19007	-6.66955	-17.8816	-10.1888	-4.53027	-15.8288	-6.04868	-4.30801	-8.56201	-8.34097	-9.71112		15.0268	15.3347	5.19007	6.66955	17.8816	10.1888	4.53027	15.8288	6.04868	4.30801	8.56201	8.34097	9.71112
-5.6723	-5.75156	-8.89819	-12.9556	-6.22907	-18.0081	-5.26396	-8.5707	-24.4199	-7.05369	-8.25778	-4.1905	-4.89081		5.6723	5.75156	8.89819	12.9556	6.22907	18.0081	5.26396	8.5707	24.4199	7.05369	8.25778	4.1905	4.89081
-7.4236	-6.2364	-6.07441	-21.7439	-7.08587	-11.3591	-4.77597	-9.67067	-5.86489	-4.24362	-12.2252	-5.95376	-11.7879		7.4236	6.2364	6.07441	21.7439	7.08587	11.3591	4.77597	9.67067	5.86489	4.24362	12.2252	5.95376	11.7879
-7.05725	-13.3091	-9.48028	-6.60707	-13.755	-11.5427	-9.17348	-6.8026	-9.03871	-5.4002	-28.2165	-6.43566	-18.9902		7.05725	13.3091	9.48028	6.60707	13.755	11.5427	9.17348	6.8026	9.03871	5.4002	28.2165	6.43566	18.9902
-5.03892	-6.099	-16.5922	-8.86474	-7.16366	-6.11262	-4.84698	-6.19295	-5.55961	-7.34732	-8.62463	-8.02108	-27.1108		5.03892	6.099	16.5922	8.86474	7.16366	6.11262	4.84698	6.19295	5.55961	7.34732	8.62463	8.02108	27.1108
-7.75877	-12.2002	-15.1765	-7.03305	-13.9998	-6.35943	-4.5419	-6.25436	-19.8414	-4.84207	-18.0853	-16.4409	-29.8576		7.75877	12.2002	15.1765	7.03305	13.9998	6.35943	4.5419	6.25436	19.8414	4.84207	18.0853	16.4409	29.8576
-5.78691	-22.5613	-6.18156	-6.66658	-6.79797	-10.3338	-8.88065	-7.59804	-12.3951	-7.64918	-10.2121	-4.84415	-17.8352		5.78691	22.5613	6.18156	6.66658	6.79797	10.3338	8.88065	7.59804	12.3951	7.64918	10.2121	4.84415	17.8352
-5.35961	-9.12074	-6.28383	-14.967	-6.55467	-10.0304	-5.76944	-4.73007	-10.0144	-4.28927	-6.85513	-9.66404	-6.97197		5.35961	9.12074	6.28383	14.967	6.55467	10.0304	5.76944	4.73007	10.0144	4.28927	6.85513	9.66404	6.97197
-5.84782	-6.9823	-6.75871	-7.03216	-6.55573	-8.20248	-5.95724	-5.89234	-14.3478	-4.4701	-7.6487	-5.38642	-6.24077		5.84782	6.9823	6.75871	7.03216	6.55573	8.20248	5.95724	5.89234	14.3478	4.4701	7.6487	5.38642	6.24077
-6.87019	-15.2825	-31.1043	-6.72695	-27.129	-17.3588	-4.68445	-23.7191	-13.1881	-8.24519	-6.30653	-11.7934	-6.4245		6.87019	15.2825	31.1043	6.72695	27.129	17.3588	4.68445	23.7191	13.1881	8.24519	6.30653	11.7934	6.4245
-6.98653	-42.8088	-6.05811	-7.76433	-9.97925	-5.57916	-8.2862	-7.54506	-6.65699	-28.2642	-11.983	-6.46079	-13.1415		6.98653	42.8088	6.05811	7.76433	9.97925	5.57916	8.2862	7.54506	6.65699	28.2642	11.983	6.46079	13.1415
-8.79622	-5.14406	-5.63073	-8.13032	-15.1695	-6.37586	-6.47163	-6.2636	-5.19214	-15.5648	-10.7015	-6.3346	-6.55383		8.79622	5.14406	5.63073	8.13032	15.1695	6.37586	6.47163	6.2636	5.19214	15.5648	10.7015	6.3346	6.55383
-5.02489	-6.18047	-9.71456	-14.4777	-9.2495	-13.4616	-6.35125	-15.2969	-12.3942	-8.4713	-8.80956	-4.01283	-16.8082		5.02489	6.18047	9.71456	14.4777	9.2495	13.4616	6.35125	15.2969	12.3942	8.4713	8.80956	4.01283	16.8082
-7.16105	-11.7922	-5.02849	-8.67931	-6.20914	-12.2418	-7.2154	-21.3399	-8.36586	-19.8189	-17.9649	-5.66021	-17.4798		7.16105	11.7922	5.02849	8.67931	6.20914	12.2418	7.2154	21.3399	8.36586	19.8189	17.9649	5.66021	17.4798
-5.20031	-8.60784	-5.02842	-35.5957	-7.73801	-8.03047	-10.7012	-7.79269	-17.1548	-4.92109	-9.54206	-8.52877	-4.41866		5.20031	8.60784	5.02842	35.5957	7.73801	8.03047	10.7012	7.79269	17.1548	4.92109	9.54206	8.52877	4.41866
-5.50538	-5.78143	-6.96542	-16.7963	-15.4928	-7.17694	-9.86327	-11.8865	-9.70839	-7.59873	-10.946	-4.24681	-23.0964		5.50538	5.78143	6.96542	16.7963	15.4928	7.17694	9.86327	11.8865	9.70839	7.59873	10.946	4.24681	23.0964
-6.05458	-6.33048	-5.5328	-6.29815	-6.58398	-5.16282	-5.71454	-6.88437	-7.81625	-10.8236	-17.1721	-22.4278	-4.05493		6.05458	6.33048	5.5328	6.29815	6.58398	5.16282	5.71454	6.88437	7.81625	10.8236	17.1721	22.4278	4.05493
-11.4729	-10.8184	-17.2087	-6.23685	-10.796	-7.05556	-10.4258	-10.0583	-12.3936	-4.83969	-10.5807	-5.64122	-9.48803		11.4729	10.8184	17.2087	6.23685	10.796	7.05556	10.4258	10.0583	12.3936	4.83969	10.5807	5.64122	9.48803
-7.26078	-8.00963	-7.56299	-6.23685	-14.8289	-5.2248	-5.4278	-5.17611	-10.2574	-5.99867	-12.4728	-4.66458	-16.7513		7.26078	8.00963	7.56299	6.23685	14.8289	5.2248	5.4278	5.17611	10.2574	5.99867	12.4728	4.66458	16.7513
-5.12438	-5.263	-8.0315	-10.6917	-11.5951	-7.97277	-9.27934	-5.78961	-7.08341	-6.91317	-13.9377	-4.72546	-16.8734		5.12438	5.263	8.0315	10.6917	11.5951	7.97277	9.27934	5.78961	7.08341	6.91317	13.9377	4.72546	16.8734
-5.36833	-5.01884	-6.08103	-7.02958	-16.5392	-10.1113	-11.6717	-7.80515	-4.76406	-4.71141	-7.16297	-15.3976	-10.5259		5.36833	5.01884	6.08103	7.02958	16.5392	10.1113	11.6717	7.80515	4.76406	4.71141	7.16297	15.3976	10.5259
-6.12834	-8.49174	-6.26302	-6.48022	-13.7365	-7.36519	-13.2652	-19.1011	-19.9007	-17.8938	-16.5015	-6.05772	-11.1372		6.12834	8.49174	6.26302	6.48022	13.7365	7.36519	13.2652	19.1011	19.9007	17.8938	16.5015	6.05772	11.1372
-13.0302	-5.92819	-14.9277	-5.86978	-7.93886	-20.7943	-6.98367	-13.9155	-6.10649	-16.1812	-14.3653	-7.5224	-27.2524		13.0302	5.92819	14.9277	5.86978	7.93886	20.7943	6.98367	13.9155	6.10649	16.1812	14.3653	7.5224	27.2524
-5.16858	-7.57591	-22.3651	-7.09005	-9.4722	-33.6125	-8.33949	-12.3921	-4.64155	-9.33492	-8.56709	-7.82634	-5.95195		5.16858	7.57591	22.3651	7.09005	9.4722	33.6125	8.33949	12.3921	4.64155	9.33492	8.56709	7.82634	5.95195
-5.59685	-7.63389	-8.68866	-19.1748	-6.48212	-5.65853	-7.13821	-15.9347	-6.53358	-9.27236	-6.1868	-12.4038	-6.5634		5.59685	7.63389	8.68866	19.1748	6.48212	5.65853	7.13821	15.9347	6.53358	9.27236	6.1868	12.4038	6.5634
-16.099	-7.44967	-5.07668	-6.05127	-8.31473	-5.65859	-7.87367	-12.2116	-4.94645	-5.18123	-9.54376	-6.0505	-6.50266		16.099	7.44967	5.07668	6.05127	8.31473	5.65859	7.87367	12.2116	4.94645	5.18123	9.54376	6.0505	6.50266
-5.12408	-7.81585	-11.3574	-8.8587	-14.8516	-5.41974	-7.09432	-12.4563	-9.58502	-5.72466	-11.3143	-8.00127	-19.3812		5.12408	7.81585	11.3574	8.8587	14.8516	5.41974	7.09432	12.4563	9.58502	5.72466	11.3143	8.00127	19.3812
-5.31028	-20.9972	-6.0014	-5.80693	-9.9811	-5.17938	-9.96441	-13.6167	-5.19012	-4.36797	-6.73677	-5.13055	-11.2058		5.31028	20.9972	6.0014	5.80693	9.9811	5.17938	9.96441	13.6167	5.19012	4.36797	6.73677	5.13055	11.2058
-5.93123	-11.8359	-6.0057	-21.2488	-6.56537	-6.58523	-5.6312	-17.7062	-5.12907	-4.6706	-11.4365	-4.82534	-4.1869		5.93123	11.8359	6.0057	21.2488	6.56537	6.58523	5.6312	17.7062	5.12907	4.6706	11.4365	4.82534	4.1869
-5.13958	-8.77444	-6.61231	-11.4829	-9.80259	-6.83251	-4.59736	-7.75922	-5.31191	-5.7687	-12.6577	-4.8848	-4.37169		5.13958	8.77444	6.61231	11.4829	9.80259	6.83251	4.59736	7.75922	5.31191	5.7687	12.6577	4.8848	4.37169
-6.01897	-8.15827	-6.67157	-9.10217	-17.7462	-6.71249	-12.5403	-6.17383	-5.73906	-15.3425	-8.69049	-7.87005	-7.1184		6.01897	8.15827	6.67157	9.10217	17.7462	6.71249	12.5403	6.17383	5.73906	15.3425	8.69049	7.87005	7.1184
-14.3942	-7.53333	-6.34733	-9.1021	-13.0524	-20.9953	-6.07699	-9.4741	-4.82352	-4.53896	-11.1931	-18.7864	-4.92115		14.3942	7.53333	6.34733	9.1021	13.0524	20.9953	6.07699	9.4741	4.82352	4.53896	11.1931	18.7864	4.92115
-5.5586	-6.18473	-15.1357	-21.1869	-10.9227	-13.9766	-5.47583	-6.85074	-6.77661	-5.75593	-8.02017	-4.3209	-4.37203		5.5586	6.18473	15.1357	21.1869	10.9227	13.9766	5.47583	6.85074	6.77661	5.75593	8.02017	4.3209	4.37203
-10.5772	-11.9825	-6.88322	-6.11116	-8.72605	-5.92018	-4.68393	-4.89783	-7.38677	-6.20729	-7.34879	-4.25446	-6.57025		10.5772	11.9825	6.88322	6.11116	8.72605	5.92018	4.68393	4.89783	7.38677	6.20729	7.34879	4.25446	6.57025
-7.93035	-5.39064	-5.65444	-15.8147	-13.3648	-8.24049	-6.52359	-15.396	-6.83712	-11.2076	-14.7951	-11.2734	-6.57026		7.93035	5.39064	5.65444	15.8147	13.3648	8.24049	6.52359	15.396	6.83712	11.2076	14.7951	11.2734	6.57026
-5.06454	-5.8764	-8.99393	-21.0636	-5.85841	-10.8081	-4.76312	-4.53328	-6.95918	-4.30404	-10.7059	-5.10215	-7.79394		5.06454	5.8764	8.99393	21.0636	5.85841	10.8081	4.76312	4.53328	6.95918	4.30404	10.7059	5.10215	7.79394
-5.38115	-8.13466	-5.59242	-7.39109	-28.1978	-15.4486	-5.86362	-13.2619	-32.9598	-4.66852	-10.9501	-6.68669	-15.6686		5.38115	8.13466	5.59242	7.39109	28.1978	15.4486	5.86362	13.2619	32.9598	4.66852	10.9501	6.68669	15.6686
-6.81364	-15.5808	-6.99278	-6.23142	-9.0334	-7.94254	-6.6146	-23.6998	-4.57821	-6.00177	-10.828	-11.244	-9.99268		6.81364	15.5808	6.99278	6.23142	9.0334	7.94254	6.6146	23.6998	4.57821	6.00177	10.828	11.244	9.99268
-6.48755	-5.81504	-7.47093	-7.0859	-5.86521	-10.0241	-5.21981	-4.96221	-5.12752	-4.16124	-6.73908	-5.56124	-16.5236		6.48755	5.81504	7.47093	7.0859	5.86521	10.0241	5.21981	4.96221	5.12752	4.16124	6.73908	5.56124	16.5236
-5.02607	-8.68308	-5.57859	-20.8182	-7.52807	-9.9058	-5.52509	-4.77946	-11.5358	-7.63567	-6.06782	-4.217	-4.13463		5.02607	8.68308	5.57859	20.8182	7.52807	9.9058	5.52509	4.77946	11.5358	7.63567	6.06782	4.217	4.13463
-8.37638	-7.64302	-6.22056	-8.48857	-7.89435	-9.17454	-4.7991	-10.7004	-4.5166	-6.28354	-6.25157	-4.09304	-5.23361		8.37638	7.64302	6.22056	8.48857	7.89435	9.17454	4.7991	10.7004	4.5166	6.28354	6.25157	4.09304	5.23361
-5.57393	-9.64713	-5.52527	-7.75574	-35.2993	-5.02529	-5.0698	-5.81843	-5.61512	-17.7531	-8.20472	-4.20993	-6.9431		5.57393	9.64713	5.52527	7.75574	35.2993	5.02529	5.0698	5.81843	5.61512	17.7531	8.20472	4.20993	6.9431
-6.35016	-5.06942	-10.9357	-8.30497	-12.4114	-5.02678	-12.0289	-8.13837	-10.864	-8.77763	-8.32693	-6.15956	-9.32496		6.35016	5.06942	10.9357	8.30497	12.4114	5.02678	12.0289	8.13837	10.864	8.77763	8.32693	6.15956	9.32496
-5.12933	-14.835	-15.6284	-6.04666	-10.642	-5.82769	-13.505	-9.36012	-4.63835	-11.3382	-11.9898	-11.0996	-7.55654		5.12933	14.835	15.6284	6.04666	10.642	5.82769	13.505	9.36012	4.63835	11.3382	11.9898	11.0996	7.55654
-8.60196	-14.4046	-7.99215	-12.6992	-12.7201	-6.50111	-5.82735	-5.02708	-12.2066	-9.18911	-7.9017	-4.13379	-4.13884		8.60196	14.4046	7.99215	12.6992	12.7201	6.50111	5.82735	5.02708	12.2066	9.18911	7.9017	4.13379	4.13884
-5.14504	-14.0371	-5.55047	-6.65641	-9.7912	-23.3472	-5.40549	-11.9253	-5.06508	-12.2348	-17.6674	-5.35375	-4.99397		5.14504	14.0371	5.55047	6.65641	9.7912	23.3472	5.40549	11.9253	5.06508	12.2348	17.6674	5.35375	4.99397
-5.02287	-5.55294	-5.88221	-10.9898	-20.0464	-15.6583	-6.2716	-18.0307	-10.0699	-5.10182	-14.5547	-5.83776	-5.60461		5.02287	5.55294	5.88221	10.9898	20.0464	15.6583	6.2716	18.0307	10.0699	5.10182	14.5547	5.83776	5.60461
-7.70785	-5.12565	-10.5171	-18.3749	-11.0138	-7.54232	-11.2183	-15.4678	-20.8731	-8.26012	-9.06196	-5.16532	-5.48335		7.70785	5.12565	10.5171	18.3749	11.0138	7.54232	11.2183	15.4678	20.8731	8.26012	9.06196	5.16532	5.48335
-5.99837	-5.73593	-22.202	-40.2254	-13.2729	-6.0789	-4.56861	-12.9054	-4.94277	-6.42167	-13.8227	-11.1407	-10.8555		5.99837	5.73593	22.202	40.2254	13.2729	6.0789	4.56861	12.9054	4.94277	6.42167	13.8227	11.1407	10.8555
-5.07838	-5.73591	-6.57636	-15.9944	-8.45268	-6.26275	-4.50767	-7.41354	-6.65144	-10.0106	-11.1374	-7.35206	-4.63054		5.07838	5.73591	6.57636	15.9944	8.45268	6.26275	4.50767	7.41354	6.65144	10.0106	11.1374	7.35206	4.63054
-7.21264	-11.7779	-6.51517	-10.8063	-8.2705	-22.7436	-4.93892	-5.21691	-7.26178	-5.97474	-13.8234	-4.78488	-10.185		7.21264	11.7779	6.51517	10.8063	8.2705	22.7436	4.93892	5.21691	7.26178	5.97474	13.8234	4.78488	10.185
-8.54488	-5.49113	-8.02907	-6.5948	-10.2888	-10.4763	-4.58656	-5.339	-9.2149	-7.37544	-10.1617	-6.18752	-7.37775		8.54488	5.49113	8.02907	6.5948	10.2888	10.4763	4.58656	5.339	9.2149	7.37544	10.1617	6.18752	7.37775
-9.32581	-5.06379	-5.40434	-9.34034	-5.83336	-5.71898	-15.841	-6.07147	-5.36965	-10.6711	-9.24666	-18.4454	-4.3264		9.32581	5.06379	5.40434	9.34034	5.83336	5.71898	15.841	6.07147	5.36965	10.6711	9.24666	18.4454	4.3264
-13.1561	-14.463	-13.3308	-21.4241	-11.7564	-6.94078	-21.4644	-6.68197	-6.65131	-14.5081	-14.8622	-6.65603	-19.3418		13.1561	14.463	13.3308	21.4241	11.7564	6.94078	21.4644	6.68197	6.65131	14.5081	14.8622	6.65603	19.3418
-11.4064	-14.8893	-5.02773	-8.66774	-21.2173	-5.35455	-12.3171	-4.97458	-4.63709	-13.4649	-6.68386	-6.10667	-11.1637		11.4064	14.8893	5.02773	8.66774	21.2173	5.35455	12.3171	4.97458	4.63709	13.4649	6.68386	6.10667	11.1637
-5.41064	-5.18146	-5.50387	-6.47045	-9.62306	-24.4588	-4.50567	-4.54749	-6.40693	-5.89243	-6.07366	-17.0279	-5.67132		5.41064	5.18146	5.50387	6.47045	9.62306	24.4588	4.50567	4.54749	6.40693	5.89243	6.07366	17.0279	5.67132
-5.46299	-5.91385	-5.67424	-11.5349	-13.4721	-17.013	-9.0898	-4.97481	-18.8581	-5.45719	-13.276	-5.48776	-9.21289		5.46299	5.91385	5.67424	11.5349	13.4721	17.013	9.0898	4.97481	18.8581	5.45719	13.276	5.48776	9.21289
-5.3366	-15.5523	-6.46732	-6.22459	-9.39707	-6.82068	-6.78373	-6.31796	-9.51926	-7.09987	-6.50118	-14.7644	-7.68985		5.3366	15.5523	6.46732	6.22459	9.39707	6.82068	6.78373	6.31796	9.51926	7.09987	6.50118	14.7644	7.68985
-6.48484	-5.71196	-7.00882	-6.16325	-9.52168	-7.12635	-8.99102	-4.91428	-6.10122	-4.04473	-19.3189	-4.86528	-4.88234		6.48484	5.71196	7.00882	6.16325	9.52168	7.12635	8.99102	4.91428	6.10122	4.04473	19.3189	4.86528	4.88234
-5.75098	-11.9298	-8.13063	-11.3509	-6.41456	-26.2304	-4.72361	-5.5864	-6.6505	-14.6625	-6.25756	-6.51273	-15.9913		5.75098	11.9298	8.13063	11.3509	6.41456	26.2304	4.72361	5.5864	6.6505	14.6625	6.25756	6.51273	15.9913
-5.4435	-8.99704	-5.18986	-10.0689	-6.17048	-5.29578	-10.8573	-8.39461	-7.44348	-4.82058	-7.05148	-7.78145	-6.8983		5.4435	8.99704	5.18986	10.0689	6.17048	5.29578	10.8573	8.39461	7.44348	4.82058	7.05148	7.78145	6.8983
-6.40829	-6.55157	-13.7758	-6.28468	-21.7379	-7.67789	-18.0022	-5.28562	-6.10065	-15.0739	-11.6916	-5.09443	-19.5938		6.40829	6.55157	13.7758	6.28468	21.7379	7.67789	18.0022	5.28562	6.10065	15.0739	11.6916	5.09443	19.5938
-5.24718	-13.8088	-6.73985	-6.52861	-43.5411	-6.21361	-5.06445	-5.22522	-6.6497	-4.69628	-11.997	-5.75489	-12.0865		5.24718	13.8088	6.73985	6.52861	43.5411	6.21361	5.06445	5.22522	6.6497	4.69628	11.997	5.75489	12.0865
-6.34498	-5.20265	-5.09649	-9.09142	-17.9701	-22.9379	-11.8397	-12.7343	-4.7576	-5.30213	-6.19876	-5.62577	-4.39777		6.34498	5.20265	5.09649	9.09142	17.9701	22.9379	11.8397	12.7343	4.7576	5.30213	6.19876	5.62577	4.39777
-6.17455	-5.26366	-6.84671	-6.4669	-6.08845	-5.72705	-5.61786	-5.10498	-7.38202	-4.86541	-18.4676	-10.6302	-8.73251		6.17455	5.26366	6.84671	6.4669	6.08845	5.72705	5.61786	5.10498	7.38202	4.86541	18.4676	10.6302	8.73251
-5.62412	-6.17917	-6.10035	-10.1289	-10.8628	-11.4667	-16.6058	-6.02057	-8.9686	-5.83314	-23.7167	-7.82232	-10.322		5.62412	6.17917	6.10035	10.1289	10.8628	11.4667	16.6058	6.02057	8.9686	5.83314	23.7167	7.82232	10.322
-9.95128	-5.08007	-10.3035	-6.28367	-28.9334	-10.3111	-194.126	-5.10846	-40.5848	-8.14422	-9.73995	-7.02609	-17.2802		9.95128	5.08007	10.3035	6.28367	28.9334	10.3111	194.126	5.10846	40.5848	8.14422	9.73995	7.02609	17.2802
-5.27548	-5.38523	-5.35954	-6.16134	-8.36622	-24.2303	-8.45788	-24.5813	-6.77121	-5.63372	-8.64138	-4.39933	-5.07458		5.27548	5.38523	5.35954	6.16134	8.36622	24.2303	8.45788	24.5813	6.77121	5.63372	8.64138	4.39933	5.07458
-5.9437	-6.17737	-10.055	-6.03834	-20.3997	-9.21789	-4.97937	-7.67476	-6.46596	-7.09071	-16.3929	-10.2291	-4.15907		5.9437	6.17737	10.055	6.03834	20.3997	9.21789	4.97937	7.67476	6.46596	7.09071	16.3929	10.2291	4.15907
-7.51248	-13.1869	-13.6497	-7.1369	-9.97639	-20.5741	-7.05495	-5.4165	-13.2407	-11.9101	-6.62754	-4.36884	-12.8873		7.51248	13.1869	13.6497	7.1369	9.97639	20.5741	7.05495	5.4165	13.2407	11.9101	6.62754	4.36884	12.8873
-5.35467	-6.27233	-5.39557	-8.05239	-14.8643	-8.85681	-5.95672	-5.11141	-4.51227	-5.43571	-7.48278	-5.82791	-16.1226		5.35467	6.27233	5.39557	8.05239	14.8643	8.85681	5.95672	5.11141	4.51227	5.43571	7.48278	5.82791	16.1226
-5.23173	-9.17178	-17.588	-7.74708	-6.0143	-5.56307	-4.8582	-12.131	-5.9158	-10.7358	-6.01804	-7.70909	-7.82189		5.23173	9.17178	17.588	7.74708	6.0143	5.56307	4.8582	12.131	5.9158	10.7358	6.01804	7.70909	7.82189
-5.2801	-6.05894	-5.19757	-6.09897	-8.40442	-8.92092	-5.83507	-6.69911	-18.3666	-26.9022	-15.0514	-6.05809	-9.65299		5.2801	6.05894	5.19757	6.09897	8.40442	8.92092	5.83507	6.69911	18.3666	26.9022	15.0514	6.05809	9.65299
-5.33797	-6.62862	-5.07305	-11.2257	-10.4221	-5.07574	-5.28773	-14.207	-5.12196	-8.7709	-8.27697	-17.2794	-18.32		5.33797	6.62862	5.07305	11.2257	10.4221	5.07574	5.28773	14.207	5.12196	8.7709	8.27697	17.2794	18.32
-5.45918	-6.67478	-6.35432	-6.09869	-12.9257	-11.4247	-4.81059	-5.4791	-5.61021	-4.54088	-16.8226	-4.39463	-5.19752		5.45918	6.67478	6.35432	6.09869	12.9257	11.4247	4.81059	5.4791	5.61021	4.54088	16.8226	4.39463	5.19752
-5.39383	-10.275	-5.25045	-18.5486	-7.31223	-9.60015	-4.51728	-7.24914	-6.09835	-4.72146	-7.3012	-9.03234	-5.92995		5.39383	10.275	5.25045	18.5486	7.31223	9.60015	4.51728	7.24914	6.09835	4.72146	7.3012	9.03234	5.92995
-5.78826	-6.67193	-6.30459	-7.62242	-7.07405	-5.63326	-16.3718	-4.92989	-4.87765	-6.97827	-6.63001	-6.62182	-5.50273		5.78826	6.67193	6.30459	7.62242	7.07405	5.63326	16.3718	4.92989	4.87765	6.97827	6.63001	6.62182	5.50273
-5.29911	-5.69534	-7.27737	-8.65953	-21.2996	-14.0581	-9.55909	-9.99585	-11.3471	-7.5844	-15.7854	-12.4183	-24.5458		5.29911	5.69534	7.27737	8.65953	21.2996	14.0581	9.55909	9.99585	11.3471	7.5844	15.7854	12.4183	24.5458
-8.78928	-5.80789	-7.4544	-6.46204	-8.54826	-8.38365	-5.1655	-12.1323	-6.03686	-8.07091	-10.4753	-12.2882	-9.04288		8.78928	5.80789	7.4544	6.46204	8.54826	8.38365	5.1655	12.1323	6.03686	8.07091	10.4753	12.2882	9.04288
-9.65508	-7.03088	-31.9354	-14.8848	-12.8818	-6.31642	-4.67831	-4.68622	-4.63302	-13.0753	-12.3675	-4.53525	-8.00532		9.65508	7.03088	31.9354	14.8848	12.8818	6.31642	4.67831	4.68622	4.63302	13.0753	12.3675	4.53525	8.00532
-5.08174	-5.74726	-6.41409	-8.29209	-12.2111	-23.7729	-8.82935	-6.51792	-6.15878	-4.15849	-11.8793	-6.72947	-4.77059		5.08174	5.74726	6.41409	8.29209	12.2111	23.7729	8.82935	6.51792	6.15878	4.15849	11.8793	6.72947	4.77059
-5.12068	-78.2453	-9.57725	-10.4881	-11.1196	-11.7515	-6.34264	-8.10501	-8.05029	-9.89385	-6.38659	-5.26413	-5.442		5.12068	78.2453	9.57725	10.4881	11.1196	11.7515	6.34264	8.10501	8.05029	9.89385	6.38659	5.26413	5.442
-5.8395	-10.5883	-6.70817	-6.15423	-9.04482	-25.1797	-4.95783	-4.93122	-6.40228	-25.1974	-7.91252	-8.55446	-8.92105		5.8395	10.5883	6.70817	6.15423	9.04482	25.1797	4.95783	4.93122	6.40228	25.1974	7.91252	8.55446	8.92105
-10.0772	-14.4876	-6.67927	-10.7317	-8.19758	-6.13719	-5.79628	-5.05331	-12.139	-6.64024	-10.1709	-5.24592	-4.77087		10.0772	14.4876	6.67927	10.7317	8.19758	6.13719	5.79628	5.05331	12.139	6.64024	10.1709	5.24592	4.77087
-5.27875	-5.70991	-14.4174	-30.3235	-9.17599	-6.38457	-9.03654	-5.90885	-18.7917	-7.4899	-6.8144	-5.23763	-4.52674		5.27875	5.70991	14.4174	30.3235	9.17599	6.38457	9.03654	5.90885	18.7917	7.4899	6.8144	5.23763	4.52674
-9.79845	-8.70959	-11.4804	-6.82394	-6.0768	-5.22558	-5.32138	-4.93348	-10.8566	-7.42843	-6.63149	-7.79486	-21.4945		9.79845	8.70959	11.4804	6.82394	6.0768	5.22558	5.32138	4.93348	10.8566	7.42843	6.63149	7.79486	21.4945
-6.22285	-17.293	-5.04994	-5.84737	-9.20117	-10.4772	-7.58016	-6.52362	-4.9971	-16.0333	-8.95136	-7.60883	-4.4658		6.22285	17.293	5.04994	5.84737	9.20117	10.4772	7.58016	6.52362	4.9971	16.0333	8.95136	7.60883	4.4658
-11.1308	-5.53627	-7.24204	-5.84713	-13.0618	-6.14414	-12.2816	-15.9844	-7.62104	-11.1496	-7.73077	-5.89976	-4.64958		11.1308	5.53627	7.24204	5.84713	13.0618	6.14414	12.2816	15.9844	7.62104	11.1496	7.73077	5.89976	4.64958
-5.45741	-11.4403	-6.56411	-7.55599	-13.3156	-5.0469	-5.5303	-8.23307	-6.40015	-6.5075	-10.9046	-8.2119	-4.83271		5.45741	11.4403	6.56411	7.55599	13.3156	5.0469	5.5303	8.23307	6.40015	6.5075	10.9046	8.2119	4.83271
-5.03932	-6.61144	-5.09661	-11.8283	-10.8149	-14.4494	-8.4701	-34.6003	-7.6208	-11.0187	-11.393	-8.08875	-9.34987		5.03932	6.61144	5.09661	11.8283	10.8149	14.4494	8.4701	34.6003	7.6208	11.0187	11.393	8.08875	9.34987
-5.47294	-10.5191	-5.09655	-7.25018	-19.1161	-6.69815	-5.00189	-9.14917	-4.63008	-5.21374	-9.3186	-7.28515	-10.5711		5.47294	10.5191	5.09655	7.25018	19.1161	6.69815	5.00189	9.14917	4.63008	5.21374	9.3186	7.28515	10.5711
-7.86946	-5.02362	-5.47505	-13.2311	-8.25685	-18.7842	-7.51588	-5.60994	-13.1134	-13.6954	-9.99027	-6.78522	-5.19998		7.86946	5.02362	5.47505	13.2311	8.25685	18.7842	7.51588	5.60994	13.1134	13.6954	9.99027	6.78522	5.19998
-5.61435	-5.1091	-5.04654	-7.55455	-9.23678	-12.5587	-5.25954	-9.40381	-13.7843	-5.45002	-8.16001	-4.22043	-5.07809		5.61435	5.1091	5.04654	7.55455	9.23678	12.5587	5.25954	9.40381	13.7843	5.45002	8.16001	4.22043	5.07809
-5.49482	-5.02976	-7.22528	-8.71404	-10.2873	-9.26481	-7.59753	-12.09	-5.97148	-4.1072	-7.30561	-12.0744	-7.6416		5.49482	5.02976	7.22528	8.71404	10.2873	9.26481	7.59753	12.09	5.97148	4.1072	7.30561	12.0744	7.6416
-5.19188	-7.59089	-14.5975	-12.254	-5.95412	-8.71848	-19.2564	-9.03934	-9.20633	-4.83822	-6.63464	-15.9697	-5.99388		5.19188	7.59089	14.5975	12.254	5.95412	8.71848	19.2564	9.03934	9.20633	4.83822	6.63464	15.9697	5.99388
-7.4119	-7.82659	-10.0439	-6.69934	-6.32633	-18.1184	-6.33331	-6.66095	-11.1592	-18.1354	-17.1328	-4.61428	-7.09254		7.4119	7.82659	10.0439	6.69934	6.32633	18.1184	6.33331	6.66095	11.1592	18.1354	17.1328	4.61428	7.09254
-5.03392	-5.07813	-8.01936	-23.5445	-9.80879	-5.97407	-7.74309	-5.62444	-6.3984	-7.99414	-14.3864	-5.4016	-6.11662		5.03392	5.07813	8.01936	23.5445	9.80879	5.97407	7.74309	5.62444	6.3984	7.99414	14.3864	5.4016	6.11662
-5.15774	-6.17993	-5.33145	-6.08832	-16.4017	-7.92807	-7.0808	-4.58688	-7.25264	-7.44295	-20.6733	-22.2395	-14.1124		5.15774	6.17993	5.33145	6.08832	16.4017	7.92807	7.0808	4.58688	7.25264	7.44295	20.6733	22.2395	14.1124
-5.46586	-5.08482	-14.5471	-11.7641	-6.08767	-23.618	-6.59795	-32.9073	-13.8444	-9.01788	-8.03932	-4.17183	-29.0663		5.46586	5.08482	14.5471	11.7641	6.08767	23.618	6.59795	32.9073	13.8444	9.01788	8.03932	4.17183	29.0663
-8.22693	-5.2104	-8.26562	-12.6175	-7.62398	-11.3632	-4.58749	-26.622	-5.48249	-8.34022	-6.69723	-6.97136	-38.0388		8.22693	5.2104	8.26562	12.6175	7.62398	11.3632	4.58749	26.622	5.48249	8.34022	6.69723	6.97136	38.0388
-8.05512	-7.90122	-7.34517	-14.0202	-10.3732	-8.19463	-22.3506	-6.78722	-7.3742	-4.06302	-19.0268	-11.4785	-11.4275		8.05512	7.90122	7.34517	14.0202	10.3732	8.19463	22.3506	6.78722	7.3742	4.06302	19.0268	11.4785	11.4275
-7.96123	-5.66927	-5.4384	-18.3526	-10.6234	-7.40167	-7.83077	-12.4637	-13.7218	-11.9602	-6.7594	-9.09728	-8.49908		7.96123	5.66927	5.4384	18.3526	10.6234	7.40167	7.83077	12.4637	13.7218	11.9602	6.7594	9.09728	8.49908
-7.19197	-5.54896	-6.09781	-11.8217	-6.72094	-17.658	-6.49042	-6.6046	-6.88587	-9.33745	-17.0744	-6.65583	-7.70597		7.19197	5.54896	6.09781	11.8217	6.72094	17.658	6.49042	6.6046	6.88587	9.33745	17.0744	6.65583	7.70597
-5.24426	-22.8456	-6.82801	-8.89198	-10.7107	-8.93102	-5.60687	-4.83561	-5.23769	-9.15545	-6.94271	-6.34866	-11.124		5.24426	22.8456	6.82801	8.89198	10.7107	8.93102	5.60687	4.83561	5.23769	9.15545	6.94271	6.34866	11.124
-13.2333	-12.4455	-10.105	-6.02318	-14.2573	-6.12375	-14.0319	-8.01082	-5.54271	-13.2481	-10.4828	-5.6142	-5.32569		13.2333	12.4455	10.105	6.02318	14.2573	6.12375	14.0319	8.01082	5.54271	13.2481	10.4828	5.6142	5.32569
-5.72929	-6.08953	-9.67014	-18.1077	-18.2871	-17.0511	-9.15792	-24.6742	-5.48157	-15.2676	-9.14015	-8.6408	-9.29314		5.72929	6.08953	9.67014	18.1077	18.2871	17.0511	9.15792	24.6742	5.48157	15.2676	9.14015	8.6408	9.29314
-7.47663	-16.7277	-7.81641	-9.44072	-6.38576	-8.57118	-8.85622	-4.77705	-6.15283	-7.88505	-17.3192	-4.12416	-4.28853		7.47663	16.7277	7.81641	9.44072	6.38576	8.57118	8.85622	4.77705	6.15283	7.88505	17.3192	4.12416	4.28853
-5.58597	-5.07962	-14.3436	-8.83025	-6.9991	-18.9612	-5.63242	-4.53293	-15.9184	-5.4472	-8.89648	-9.37182	-4.83823		5.58597	5.07962	14.3436	8.83025	6.9991	18.9612	5.63242	4.53293	15.9184	5.4472	8.89648	9.37182	4.83823
-5.65592	-9.82788	-18.4782	-9.62353	-6.63884	-9.86803	-5.75642	-5.87592	-7.00724	-7.70997	-6.94413	-7.96706	-10.7589		5.65592	9.82788	18.4782	9.62353	6.63884	9.86803	5.75642	5.87592	7.00724	7.70997	6.94413	7.96706	10.7589
-6.63471	-5.16381	-11.2029	-8.76874	-23.8525	-7.36588	-4.61044	-4.53316	-4.56556	-4.05161	-16.832	-10.5891	-6.4867		6.63471	5.16381	11.2029	8.76874	23.8525	7.36588	4.61044	4.53316	4.56556	4.05161	16.832	10.5891	6.4867
-6.14962	-9.34674	-5.55854	-10.7208	-10.3724	-11.5261	-8.82893	-7.89071	-5.35871	-24.5011	-10.7289	-7.47026	-7.15858		6.14962	9.34674	5.55854	10.7208	10.3724	11.5261	8.82893	7.89071	5.35871	24.5011	10.7289	7.47026	7.15858
-6.02961	-5.37681	-8.28542	-22.1343	-10.5007	-8.29253	-4.98869	-8.74579	-12.5607	-11.442	-9.56966	-6.18289	-9.48077		6.02961	5.37681	8.28542	22.1343	10.5007	8.29253	4.98869	8.74579	12.5607	11.442	9.56966	6.18289	9.48077
-7.37875	-5.54939	-5.71541	-21.5849	-8.97542	-13.542	-6.76981	-6.91478	-15.6734	-9.18491	-15.124	-9.05122	-6.24593		7.37875	5.54939	5.71541	21.5849	8.97542	13.542	6.76981	6.91478	15.6734	9.18491	15.124	9.05122	6.24593
-5.67086	-5.04061	-7.90673	-6.75234	-13.6834	-5.05812	-8.42089	-8.86976	-12.0113	-12.3043	-6.51816	-4.22448	-20.2231		5.67086	5.04061	7.90673	6.75234	13.6834	5.05812	8.42089	8.86976	12.0113	12.3043	6.51816	4.22448	20.2231
-7.50177	-6.7814	-9.54843	-13.161	-6.97271	-14.8855	-6.22675	-20.6499	-12.0112	-4.06904	-6.27402	-4.28147	-11.0069		7.50177	6.7814	9.54843	13.161	6.97271	14.8855	6.22675	20.6499	12.0112	4.06904	6.27402	4.28147	11.0069
-5.24343	-5.29752	-12.2712	-14.5648	-8.43768	-8.23277	-9.70635	-7.59086	-9.26463	-6.71291	-10.5475	-4.64394	-20.2852		5.24343	5.29752	12.2712	14.5648	8.43768	8.23277	9.70635	7.59086	9.26463	6.71291	10.5475	4.64394	20.2852
-7.98999	-5.17528	-19.5928	-12.4892	-6.66894	-27.889	-7.70763	-7.53155	-7.06727	-14.4696	-8.77748	-5.0684	-7.77338		7.98999	5.17528	19.5928	12.4892	6.66894	27.889	7.70763	7.53155	7.06727	14.4696	8.77748	5.0684	7.77338
-5.67064	-7.53627	-6.46806	-18.0433	-5.81709	-7.62635	-5.20546	-4.78622	-7.43323	-6.54229	-6.03124	-4.27411	-18.8213		5.67064	7.53627	6.46806	18.0433	5.81709	7.62635	5.20546	4.78622	7.43323	6.54229	6.03124	4.27411	18.8213
-5.73166	-7.10784	-16.7601	-6.26347	-25.0085	-9.51889	-11.129	-21.0251	-12.2549	-4.41194	-27.2721	-5.60354	-17.7838		5.73166	7.10784	16.7601	6.26347	25.0085	9.51889	11.129	21.0251	12.2549	4.41194	27.2721	5.60354	17.7838
-5.36478	-5.8762	-7.63038	-9.00986	-10.8522	-10.4957	-4.9705	-12.3598	-9.44722	-5.4186	-7.98506	-5.29804	-5.09009		5.36478	5.8762	7.63038	9.00986	10.8522	10.4957	4.9705	12.3598	9.44722	5.4186	7.98506	5.29804	5.09009
-13.1745	-8.50057	-17.4249	-10.8399	-6.88973	-12.9373	-18.0964	-6.98922	-9.44717	-8.12113	-8.96192	-5.53929	-7.77572		13.1745	8.50057	17.4249	10.8399	6.88973	12.9373	18.0964	6.98922	9.44717	8.12113	8.96192	5.53929	7.77572
-8.95785	-12.0928	-11.7045	-22.9858	-6.40151	-16.8457	-6.25845	-20.4173	-4.80835	-5.34666	-8.41267	-4.43789	-5.94487		8.95785	12.0928	11.7045	22.9858	6.40151	16.8457	6.25845	20.4173	4.80835	5.34666	8.41267	4.43789	5.94487
-6.3943	-7.14863	-5.56447	-12.7927	-8.72763	-25.33	-5.91491	-6.92874	-8.53127	-22.6256	-7.00902	-6.8666	-7.65392		6.3943	7.14863	5.56447	12.7927	8.72763	25.33	5.91491	6.92874	8.53127	22.6256	7.00902	6.8666	7.65392
-6.33325	-5.68275	-5.31848	-9.49625	-6.65369	-7.50869	-6.78156	-12.8493	-6.02876	-5.91653	-9.93923	-6.19167	-6.67766		6.33325	5.68275	5.31848	9.49625	6.65369	7.50869	6.78156	12.8493	6.02876	5.91653	9.93923	6.19167	6.67766
-7.9778	-5.13304	-7.24491	-16.2101	-15.0209	-15.4459	-5.92736	-5.64808	-11.0336	-5.12333	-8.7798	-5.51933	-4.48083		7.9778	5.13304	7.24491	16.2101	15.0209	15.4459	5.92736	5.64808	11.0336	5.12333	8.7798	5.51933	4.48083
-27.2648	-6.10947	-5.53327	-7.48181	-10.3889	-7.39034	-4.95091	-6.80933	-12.9256	-10.6232	-6.33859	-4.04811	-6.68246		27.2648	6.10947	5.53327	7.48181	10.3889	7.39034	4.95091	6.80933	12.9256	10.6232	6.33859	4.04811	6.68246
-5.71934	-5.43796	-19.1352	-6.87109	-12.0991	-29.5524	-4.52578	-6.74871	-14.5125	-6.05941	-8.23121	-4.88991	-6.13353		5.71934	5.43796	19.1352	6.87109	12.0991	29.5524	4.52578	6.74871	14.5125	6.05941	8.23121	4.88991	6.13353
-14.4472	-5.60838	-5.38041	-13.7069	-5.93749	-11.3086	-15.637	-14.5613	-9.62937	-12.3142	-7.49896	-5.19504	-4.91444		14.4472	5.60838	5.38041	13.7069	5.93749	11.3086	15.637	14.5613	9.62937	12.3142	7.49896	5.19504	4.91444
-5.2919	-5.65738	-10.0732	-6.07754	-13.4554	-8.56525	-4.71582	-4.61259	-4.80738	-8.16735	-9.9404	-11.907	-5.52691		5.2919	5.65738	10.0732	6.07754	13.4554	8.56525	4.71582	4.61259	4.80738	8.16735	9.9404	11.907	5.52691
-15.0561	-5.84039	-6.39269	-6.74891	-15.9026	-19.3696	-5.14916	-4.85676	-4.80734	-6.21887	-12.3821	-4.50997	-6.01599		15.0561	5.84039	6.39269	6.74891	15.9026	19.3696	5.14916	4.85676	4.80734	6.21887	12.3821	4.50997	6.01599
-5.10732	-16.5772	-10.8336	-7.29818	-10.7859	-15.5273	-5.08948	-7.84858	-8.59145	-6.22294	-6.15698	-4.57096	-7.11557		5.10732	16.5772	10.8336	7.29818	10.7859	15.5273	5.08948	7.84858	8.59145	6.22294	6.15698	4.57096	7.11557
-7.79252	-5.58603	-13.2785	-8.94603	-11.3976	-12.1797	-5.33934	-10.9625	-12.2535	-9.41634	-15.3734	-11.9415	-7.11733		7.79252	5.58603	13.2785	8.94603	11.3976	12.1797	5.33934	10.9625	12.2535	9.41634	15.3734	11.9415	7.11733
-9.01136	-5.83009	-9.28697	-12.2419	-7.43425	-5.95497	-5.05591	-9.37678	-4.86826	-9.28189	-10.5517	-4.85761	-7.91084		9.01136	5.83009	9.28697	12.2419	7.43425	5.95497	5.05591	9.37678	4.86826	9.28189	10.5517	4.85761	7.91084
-6.44786	-7.77518	-8.67571	-24.8884	-21.9171	-5.53237	-5.85391	-5.16555	-4.62409	-7.35239	-6.4625	-6.13743	-4.67706		6.44786	7.77518	8.67571	24.8884	21.9171	5.53237	5.85391	5.16555	4.62409	7.35239	6.4625	6.13743	4.67706
-5.77049	-13.5714	-7.8193	-15.7917	-6.59939	-7.73194	-11.2696	-21.3419	-17.5024	-7.79404	-16.2287	-4.79249	-5.53254		5.77049	13.5714	7.8193	15.7917	6.59939	7.73194	11.2696	21.3419	17.5024	7.79404	16.2287	4.79249	5.53254
-8.81937	-5.33142	-6.04908	-5.88623	-28.2075	-20.4919	-11.0895	-4.67975	-18.9061	-5.36115	-17.8156	-6.19238	-16.6417		8.81937	5.33142	6.04908	5.88623	28.2075	20.4919	11.0895	4.67975	18.9061	5.36115	17.8156	6.19238	16.6417
-6.37729	-6.73085	-5.11944	-6.19622	-27.846	-5.90664	-4.50125	-11.5166	-18.0516	-9.20856	-10.3696	-7.65642	-10.4777		6.37729	6.73085	5.11944	6.19622	27.846	5.90664	4.50125	11.5166	18.0516	9.20856	10.3696	7.65642	10.4777
-5.03229	-17.2266	-5.97382	-6.13259	-8.50664	-13.418	-4.80649	-5.65765	-5.05115	-14.8385	-6.89058	-4.34563	-14.9956		5.03229	17.2266	5.97382	6.13259	8.50664	13.418	4.80649	5.65765	5.05115	14.8385	6.89058	4.34563	14.9956
-5.15434	-5.32428	-5.11924	-6.06554	-17.9682	-11.7131	-21.0465	-4.62066	-6.08874	-4.67811	-11.8345	-8.73818	-4.19344		5.15434	5.32428	5.11924	6.06554	17.9682	11.7131	21.0465	4.62066	6.08874	4.67811	11.8345	8.73818	4.19344
-5.21537	-11.3039	-8.53427	-7.45646	-7.47233	-6.52796	-4.753	-18.9029	-7.43151	-4.14462	-17.4501	-8.3713	-8.04036		5.21537	11.3039	8.53427	7.45646	7.47233	6.52796	4.753	18.9029	7.43151	4.14462	17.4501	8.3713	8.04036
-5.76466	-19.2319	-19.197	-5.92184	-7.47608	-5.91825	-9.88377	-8.28333	-6.45482	-9.24554	-16.3517	-4.15977	-6.27084		5.76466	19.2319	19.197	5.92184	7.47608	5.91825	9.88377	8.28333	6.45482	9.24554	16.3517	4.15977	6.27084
-9.97517	-5.19227	-29.808	-7.18088	-5.95375	-5.1877	-11.2285	-8.835	-8.40772	-9.91733	-7.92917	-5.50154	-4.0745		9.97517	5.19227	29.808	7.18088	5.95375	5.1877	11.2285	8.835	8.40772	9.91733	7.92917	5.50154	4.0745
-5.39751	-24.0337	-7.22062	-5.96962	-18.8943	-7.32439	-27.5349	-11.5828	-8.10252	-6.26272	-16.2304	-7.62724	-10.0561		5.39751	24.0337	7.22062	5.96962	18.8943	7.32439	27.5349	11.5828	8.10252	6.26272	16.2304	7.62724	10.0561
-6.74027	-20.0563	-19.8506	-5.92901	-9.25634	-5.98354	-20.8318	-12.2553	-4.86761	-6.57066	-6.8311	-9.63028	-4.13622		6.74027	20.0563	19.8506	5.92901	9.25634	5.98354	20.8318	12.2553	4.86761	6.57066	6.8311	9.63028	4.13622
-5.03127	-10.2881	-5.19043	-6.04442	-9.92915	-12.9426	-6.92304	-6.76338	-5.41667	-12.8566	-27.7663	-10.2387	-25.4383		5.03127	10.2881	5.19043	6.04442	9.92915	12.9426	6.92304	6.76338	5.41667	12.8566	27.7663	10.2387	25.4383
-6.37315	-10.3855	-6.33471	-14.5908	-8.6571	-15.9959	-5.03615	-9.32844	-8.83451	-4.33971	-6.40472	-5.59557	-8.34866		6.37315	10.3855	6.33471	14.5908	8.6571	15.9959	5.03615	9.32844	8.83451	4.33971	6.40472	5.59557	8.34866
-5.27451	-6.27154	-6.3285	-5.9244	-7.07075	-21.4283	-12.1175	-13.9681	-9.74995	-6.91601	-6.22162	-15.9712	-10.5495		5.27451	6.27154	6.3285	5.9244	7.07075	21.4283	12.1175	13.9681	9.74995	6.91601	6.22162	15.9712	10.5495
-6.00647	-5.04381	-9.37188	-6.96267	-13.1819	-5.13272	-11.3984	-4.56874	-7.12541	-8.69101	-7.44284	-12.5517	-4.93434		6.00647	5.04381	9.37188	6.96267	13.1819	5.13272	11.3984	4.56874	7.12541	8.69101	7.44284	12.5517	4.93434
-6.67785	-5.10478	-12.785	-23.6296	-20.4505	-38.2181	-4.933	-5.24068	-4.98914	-5.28367	-12.2647	-4.0006	-16.8371		6.67785	5.10478	12.785	23.6296	20.4505	38.2181	4.933	5.24068	4.98914	5.28367	12.2647	4.0006	16.8371
-5.21298	-10.0448	-5.86208	-11.7893	-14.6597	-9.16651	-4.57304	-6.16001	-11.3978	-6.87819	-10.2511	-4.24427	-11.1615		5.21298	10.0448	5.86208	11.7893	14.6597	9.16651	4.57304	6.16001	11.3978	6.87819	10.2511	4.24427	11.1615
-5.8198	-8.02523	-23.313	-10.0803	-12.0993	-31.8124	-4.82188	-19.8937	-13.656	-13.548	-9.15253	-10.0398	-6.40082		5.8198	8.02523	23.313	10.0803	12.0993	31.8124	4.82188	19.8937	13.656	13.548	9.15253	10.0398	6.40082
-6.55038	-13.3326	-5.60002	-6.05323	-11.674	-6.60614	-6.91141	-4.6359	-6.94205	-8.49103	-11.5332	-4.42325	-23.9795		6.55038	13.3326	5.60002	6.05323	11.674	6.60614	6.91141	4.6359	6.94205	8.49103	11.5332	4.42325	23.9795
-8.43736	-5.74361	-5.29471	-9.71702	-11.1988	-24.1896	-5.81329	-6.47267	-5.41602	-7.45633	-31.0035	-10.9503	-8.41666		8.43736	5.74361	5.29471	9.71702	11.1988	24.1896	5.81329	6.47267	5.41602	7.45633	31.0035	10.9503	8.41666
-15.2107	-21.7287	-5.35561	-6.72658	-12.9257	-10.3389	-5.50882	-4.58121	-5.96527	-8.51199	-7.26079	-5.75034	-4.38839		15.2107	21.7287	5.35561	6.72658	12.9257	10.3389	5.50882	4.58121	5.96527	8.51199	7.26079	5.75034	4.38839
-6.96395	-5.18789	-5.15489	-7.88717	-16.4708	-5.08995	-11.0187	-14.7137	-4.98871	-5.66841	-7.44403	-6.89136	-23.1268		6.96395	5.18789	5.15489	7.88717	16.4708	5.08995	11.0187	14.7137	4.98871	5.66841	7.44403	6.89136	23.1268
-8.36757	-12.5589	-5.07976	-14.1738	-23.8605	-24.0729	-6.0306	-15.0194	-8.52858	-4.47969	-7.74935	-10.0575	-6.34232		8.36757	12.5589	5.07976	14.1738	23.8605	24.0729	6.0306	15.0194	8.52858	4.47969	7.74935	10.0575	6.34232
-9.5882	-12.4053	-15.9411	-18.1411	-6.30594	-12.5986	-22.411	-6.04725	-8.10091	-17.1848	-11.1065	-4.19809	-5.61019		9.5882	12.4053	15.9411	18.1411	6.30594	12.5986	22.411	6.04725	8.10091	17.1848	11.1065	4.19809	5.61019
-7.26792	-5.74512	-7.63669	-6.05737	-27.7922	-6.12955	-5.14262	-5.00979	-4.74392	-6.57863	-7.99395	-5.47689	-4.63366		7.26792	5.74512	7.63669	6.05737	27.7922	6.12955	5.14262	5.00979	4.74392	6.57863	7.99395	5.47689	4.63366
-5.19269	-7.38071	-5.01204	-8.74489	-17.1113	-11.5023	-10.3489	-5.37603	-7.49049	-8.29803	-12.0226	-6.08716	-9.5174		5.19269	7.38071	5.01204	8.74489	17.1113	11.5023	10.3489	5.37603	7.49049	8.29803	12.0226	6.08716	9.5174
-6.7181	-5.97681	-7.14743	-6.98207	-20.0422	-10.8322	-4.73553	-4.64363	-5.23202	-5.27704	-8.97098	-9.68791	-4.20794		6.7181	5.97681	7.14743	6.98207	20.0422	10.8322	4.73553	4.64363	5.23202	5.27704	8.97098	9.68791	4.20794
-6.53497	-6.98454	-6.94081	-10.2179	-5.82403	-6.92891	-19.4719	-4.6437	-17.1339	-11.7133	-11.2904	-7.18503	-5.18535		6.53497	6.98454	6.94081	10.2179	5.82403	6.92891	19.4719	4.6437	17.1339	11.7133	11.2904	7.18503	5.18535
-6.04666	-7.63638	-9.90664	-6.49639	-14.0048	-5.89497	-6.78121	-4.52167	-9.26018	-6.73084	-14.2814	-10.5398	-7.32212		6.04666	7.63638	9.90664	6.49639	14.0048	5.89497	6.78121	4.52167	9.26018	6.73084	14.2814	10.5398	7.32212
-8.73217	-19.8949	-5.12136	-5.82586	-16.7705	-7.78739	-8.00595	-4.88803	-5.47597	-9.19244	-10.1923	-7.18012	-12.9388		8.73217	19.8949	5.12136	5.82586	16.7705	7.78739	8.00595	4.88803	5.47597	9.19244	10.1923	7.18012	12.9388
-5.61937	-9.20573	-5.84087	-11.9907	-12.6935	-6.99397	-12.1704	-13.0705	-11.0911	-8.58833	-8.11722	-4.55072	-10.6218		5.61937	9.20573	5.84087	11.9907	12.6935	6.99397	12.1704	13.0705	11.0911	8.58833	8.11722	4.55072	10.6218
-7.32833	-6.39707	-5.27333	-13.2772	-11.1691	-5.16373	-4.96866	-10.6305	-13.4103	-10.5445	-6.16421	-4.85439	-5.00754		7.32833	6.39707	5.27333	13.2772	11.1691	5.16373	4.96866	10.6305	13.4103	10.5445	6.16421	4.85439	5.00754
-5.4362	-7.71404	-7.53019	-7.29595	-21.5509	-15.4208	-7.0476	-5.50647	-6.39121	-6.42905	-8.42253	-6.62042	-8.91475		5.4362	7.71404	7.53019	7.29595	21.5509	15.4208	7.0476	5.50647	6.39121	6.42905	8.42253	6.62042	8.91475
-6.90038	-25.8034	-11.0684	-7.96746	-12.1516	-13.9604	-4.72885	-4.65228	-9.13725	-16.4681	-16.8456	-6.19058	-4.3373		6.90038	25.8034	11.0684	7.96746	12.1516	13.9604	4.72885	4.65228	9.13725	16.4681	16.8456	6.19058	4.3373
-5.67954	-11.2511	-7.82316	-17.4891	-6.78352	-23.7269	-14.744	-11.7951	-5.84132	-8.05064	-14.2212	-7.65458	-4.64412		5.67954	11.2511	7.82316	17.4891	6.78352	23.7269	14.744	11.7951	5.84132	8.05064	14.2212	7.65458	4.64412
-5.86263	-15.6965	-6.96805	-15.7803	-8.61519	-5.35678	-5.95545	-5.87468	-9.01494	-12.287	-6.46985	-14.4269	-21.4297		5.86263	15.6965	6.96805	15.7803	8.61519	5.35678	5.95545	5.87468	9.01494	12.287	6.46985	14.4269	21.4297
-6.77771	-16.2869	-5.37744	-9.12778	-10.332	-12.8092	-5.29381	-5.08288	-5.53561	-10.6662	-7.01927	-10.0892	-9.40848		6.77771	16.2869	5.37744	9.12778	10.332	12.8092	5.29381	5.08288	5.53561	10.6662	7.01927	10.0892	9.40848
-5.12975	-7.30159	-5.68165	-13.3401	-15.5819	-16.4171	-7.87926	-4.53357	-4.92526	-4.19978	-46.8755	-4.53046	-4.22144		5.12975	7.30159	5.68165	13.3401	15.5819	16.4171	7.87926	4.53357	4.92526	4.19978	46.8755	4.53046	4.22144
-5.9232	-5.83033	-5.37603	-6.62716	-14.4944	-16.2386	-5.25488	-6.12068	-7.54945	-7.88573	-8.66855	-4.22526	-7.09012		5.9232	5.83033	5.37603	6.62716	14.4944	16.2386	5.25488	6.12068	7.54945	7.88573	8.66855	4.22526	7.09012
-7.93695	-5.21346	-7.92176	-16.2103	-46.538	-7.08343	-9.95739	-5.20899	-6.57284	-9.72249	-10.8659	-13.9905	-8.73817		7.93695	5.21346	7.92176	16.2103	46.538	7.08343	9.95739	5.20899	6.57284	9.72249	10.8659	13.9905	8.73817
-6.04283	-7.51186	-5.84329	-9.92565	-6.6238	-11.4784	-9.42409	-17.7823	-5.96237	-12.1226	-7.81426	-11.7301	-5.38172		6.04283	7.51186	5.84329	9.92565	6.6238	11.4784	9.42409	17.7823	5.96237	12.1226	7.81426	11.7301	5.38172
-5.4935	-7.45056	-5.90079	-10.5393	-6.86798	-9.58748	-5.82969	-9.66508	-12.9203	-5.10582	-11.8426	-10.8753	-7.33488		5.4935	7.45056	5.90079	10.5393	6.86798	9.58748	5.82969	9.66508	12.9203	5.10582	11.8426	10.8753	7.33488
-5.00521	-7.93712	-5.20233	-11.5172	-9.49304	-21.124	-5.70779	-5.02767	-5.04664	-26.8986	-7.69272	-7.09101	-5.26292		5.00521	7.93712	5.20233	11.5172	9.49304	21.124	5.70779	5.02767	5.04664	26.8986	7.69272	7.09101	5.26292
-12.7566	-5.02773	-5.37572	-9.99366	-14.6895	-6.85857	-9.32251	-9.18318	-22.8688	-8.1618	-7.20444	-7.94466	-5.81306		12.7566	5.02773	5.37572	9.99366	14.6895	6.85857	9.32251	9.18318	22.8688	8.1618	7.20444	7.94466	5.81306
-5.18811	-25.2826	-8.96099	-5.96881	-13.6555	-5.2717	-11.7666	-6.92988	-36.6628	-8.90589	-23.013	-5.25874	-27.908		5.18811	25.2826	8.96099	5.96881	13.6555	5.2717	11.7666	6.92988	36.6628	8.90589	23.013	5.25874	27.908
-9.76573	-5.00034	-5.78039	-12.5606	-8.06994	-5.08861	-11.0999	-7.84681	-5.29024	-16.7991	-17.3368	-4.21798	-19.4865		9.76573	5.00034	5.78039	12.5606	8.06994	5.08861	11.0999	7.84681	5.29024	16.7991	17.3368	4.21798	19.4865
-8.47815	-13.7272	-6.40954	-6.15239	-11.3073	-22.4978	-5.20925	-14.0131	-6.57195	-6.73012	-6.41153	-4.39004	-7.09908		8.47815	13.7272	6.40954	6.15239	11.3073	22.4978	5.20925	14.0131	6.57195	6.73012	6.41153	4.39004	7.09908
-9.5754	-6.3945	-6.1006	-27.2718	-5.9991	-6.0209	-8.44535	-5.22549	-8.15881	-9.96539	-7.99874	-5.90981	-4.78067		9.5754	6.3945	6.1006	27.2718	5.9991	6.0209	8.44535	5.22549	8.15881	9.96539	7.99874	5.90981	4.78067
-5.41977	-9.91545	-5.29581	-6.39839	-32.1836	-5.83985	-5.21149	-22.4986	-5.6562	-4.4117	-8.60915	-6.70074	-7.58856		5.41977	9.91545	5.29581	6.39839	32.1836	5.83985	5.21149	22.4986	5.6562	4.4117	8.60915	6.70074	7.58856
-5.47936	-8.95683	-8.9446	-9.99986	-13.385	-7.79892	-5.33369	-9.98695	-8.58554	-5.69525	-18.0698	-6.63644	-6.18683		5.47936	8.95683	8.9446	9.99986	13.385	7.79892	5.33369	9.98695	8.58554	5.69525	18.0698	6.63644	6.18683
-7.18809	-6.8171	-5.50911	-16.4705	-14.0568	-7.06789	-4.78853	-5.71922	-6.14382	-4.36413	-14.3469	-6.38294	-31.1511		7.18809	6.8171	5.50911	16.4705	14.0568	7.06789	4.78853	5.71922	6.14382	4.36413	14.3469	6.38294	31.1511
-9.80383	-5.92362	-6.44423	-5.85227	-18.2784	-6.88694	-4.60552	-9.50462	-7.54752	-7.14324	-6.90067	-6.68489	-14.2445		9.80383	5.92362	6.44423	5.85227	18.2784	6.88694	4.60552	9.50462	7.54752	7.14324	6.90067	6.68489	14.2445
-5.64311	-5.66922	-6.35458	-15.3134	-34.7211	-7.08663	-8.09235	-7.43073	-11.0265	-6.36621	-11.6005	-6.80669	-8.26312		5.64311	5.66922	6.35458	15.3134	34.7211	7.08663	8.09235	7.43073	11.0265	6.36621	11.6005	6.80669	8.26312
-5.39896	-7.15967	-5.86367	-7.8082	-7.92781	-8.12824	-7.81633	-5.7879	-4.55642	-5.91065	-6.41272	-6.13455	-4.96815		5.39896	7.15967	5.86367	7.8082	7.92781	8.12824	7.81633	5.7879	4.55642	5.91065	6.41272	6.13455	4.96815
-7.89673	-5.02339	-7.62142	-5.97845	-25.8761	-10.5099	-4.72096	-8.29258	-5.16662	-7.51134	-12.9437	-13.1531	-5.76321		7.89673	5.02339	7.62142	5.97845	25.8761	10.5099	4.72096	8.29258	5.16662	7.51134	12.9437	13.1531	5.76321
-5.93853	-12.59	-5.40111	-14.3427	-13.4377	-12.6475	-5.46616	-7.43871	-4.67827	-13.3103	-9.70883	-5.70663	-33.4131		5.93853	12.59	5.40111	14.3427	13.4377	12.6475	5.46616	7.43871	4.67827	13.3103	9.70883	5.70663	33.4131
-5.14507	-9.71381	-5.48773	-13.1833	-20.2782	-9.29375	-8.46853	-4.57098	-8.15724	-25.9559	-10.5024	-4.60734	-19.9248		5.14507	9.71381	5.48773	13.1833	20.2782	9.29375	8.46853	4.57098	8.15724	25.9559	10.5024	4.60734	19.9248
-8.73601	-9.81747	-6.58031	-7.38517	-12.6635	-8.37893	-6.53868	-4.51011	-4.92238	-7.5921	-9.70913	-7.471	-5.52068		8.73601	9.81747	6.58031	7.38517	12.6635	8.37893	6.53868	4.51011	4.92238	7.5921	9.70913	7.471	5.52068
-5.50047	-7.36836	-5.81985	-14.8926	-9.80515	-6.36989	-6.18982	-9.21107	-8.64507	-4.17495	-8.91571	-4.11396	-17.6669		5.50047	7.36836	5.81985	14.8926	9.80515	6.36989	6.18982	9.21107	8.64507	4.17495	8.91571	4.11396	17.6669
-12.0921	-5.1055	-13.5683	-12.9397	-11.7098	-7.46933	-5.36539	-6.0985	-22.1949	-7.43192	-15.3245	-5.88329	-5.88788		12.0921	5.1055	13.5683	12.9397	11.7098	7.46933	5.36539	6.0985	22.1949	7.43192	15.3245	5.88329	5.88788
-5.56098	-5.28846	-10.1452	-6.28702	-5.9141	-5.70364	-5.62919	-6.95304	-6.56969	-6.40016	-13.0663	-4.23502	-23.5279		5.56098	5.28846	10.1452	6.28702	5.9141	5.70364	5.62919	6.95304	6.56969	6.40016	13.0663	4.23502	23.5279
-5.74408	-11.9361	-8.00367	-6.10468	-10.1321	-10.2883	-9.96461	-5.48856	-6.93525	-11.1003	-6.6577	-5.63816	-29.1449		5.74408	11.9361	8.00367	6.10468	10.1321	10.2883	9.96461	5.48856	6.93525	11.1003	6.6577	5.63816	29.1449
-7.81764	-6.43293	-5.98644	-5.92221	-7.14434	-18.0412	-10.9867	-4.51289	-5.10417	-8.48332	-9.16015	-8.68938	-28.4736		7.81764	6.43293	5.98644	5.92221	7.14434	18.0412	10.9867	4.51289	5.10417	8.48332	9.16015	8.68938	28.4736
-5.55874	-6.40232	-5.83054	-6.77938	-18.3757	-5.89716	-7.58107	-4.94014	-7.24009	-5.37204	-7.81758	-6.73477	-19.1359		5.55874	6.40232	5.83054	6.77938	18.3757	5.89716	7.58107	4.94014	7.24009	5.37204	7.81758	6.73477	19.1359
-5.25324	-15.7867	-5.21879	-17.7056	-8.49017	-7.11908	-13.4415	-4.7579	-4.5545	-5.50757	-15.5691	-5.45283	-6.19849		5.25324	15.7867	5.21879	17.7056	8.49017	7.11908	13.4415	4.7579	4.5545	5.50757	15.5691	5.45283	6.19849
-5.61893	-7.78263	-5.27911	-8.13094	-8.61407	-6.02402	-9.29415	-17.576	-6.32431	-4.53331	-14.0436	-4.35416	-6.9312		5.61893	7.78263	5.27911	8.13094	8.61407	6.02402	9.29415	17.576	6.32431	4.53331	14.0436	4.35416	6.9312
-5.67959	-5.54896	-5.14255	-8.92444	-8.06613	-12.4993	-10.2157	-4.51455	-12.6108	-6.87114	-10.8698	-7.70983	-5.03921		5.67959	5.54896	5.14255	8.92444	8.06613	12.4993	10.2157	4.51455	12.6108	6.87114	10.8698	7.70983	5.03921
-7.26604	-13.1659	-7.21529	-9.65915	-6.85498	-13.4173	-8.88097	-6.40793	-7.4227	-4.3187	-13.6165	-4.04066	-17.5524		7.26604	13.1659	7.21529	9.65915	6.85498	13.4173	8.88097	6.40793	7.4227	4.3187	13.6165	4.04066	17.5524
-5.19052	-5.29218	-5.44233	-6.48622	-8.87473	-20.1938	-10.4109	-5.00421	-10.047	-10.8102	-13.0061	-6.47732	-20.1771		5.19052	5.29218	5.44233	6.48622	8.87473	20.1938	10.4109	5.00421	10.047	10.8102	13.0061	6.47732	20.1771
-5.12797	-5.53627	-5.68396	-9.96529	-7.35195	-17.0855	-5.0493	-5.37044	-6.50697	-8.99188	-7.81827	-10.0719	-4.61387		5.12797	5.53627	5.68396	9.96529	7.35195	17.0855	5.0493	5.37044	6.50697	8.99188	7.81827	10.0719	4.61387
-6.40756	-8.45722	-5.00447	-11.414	-7.47411	-11.1711	-6.89827	-4.63806	-4.73694	-11.0101	-11.6636	-6.16238	-9.00862		6.40756	8.45722	5.00447	11.414	7.47411	11.1711	6.89827	4.63806	4.73694	11.0101	11.6636	6.16238	9.00862
-5.98029	-6.86972	-7.4428	-9.62505	-7.41318	-8.43307	-4.62327	-10.0095	-11.5729	-4.92012	-8.42875	-4.19816	-6.01865		5.98029	6.86972	7.4428	9.62505	7.41318	8.43307	4.62327	10.0095	11.5729	4.92012	8.42875	4.19816	6.01865
-6.59012	-5.46578	-12.8135	-16.5366	-6.37567	-10.0921	-13.7824	-8.60702	-5.10264	-4.43258	-10.1992	-42.7066	-13.5871		6.59012	5.46578	12.8135	16.5366	6.37567	10.0921	13.7824	8.60702	5.10264	4.43258	10.1992	42.7066	13.5871
-5.30836	-5.26959	-7.30839	-13.3485	-6.74192	-8.62765	-6.11723	-11.7858	-8.88634	-6.39926	-8.00197	-4.37427	-22.1327		5.30836	5.26959	7.30839	13.3485	6.74192	8.62765	6.11723	11.7858	8.88634	6.39926	8.00197	4.37427	22.1327
-14.3365	-5.07028	-5.22866	-9.10774	-10.0991	-12.4132	-4.9142	-30.4031	-16.5157	-11.0633	-7.51376	-4.25163	-4.67689		14.3365	5.07028	5.22866	9.10774	10.0991	12.4132	4.9142	30.4031	16.5157	11.0633	7.51376	4.25163	4.67689
-5.54736	-11.9622	-12.0271	-5.98428	-8.14614	-5.5167	-14.8407	-7.94442	-8.15361	-6.00692	-14.2887	-6.44806	-13.4062		5.54736	11.9622	12.0271	5.98428	8.14614	5.5167	14.8407	7.94442	8.15361	6.00692	14.2887	6.44806	13.4062
-5.30309	-5.42581	-6.69377	-42.7793	-6.55935	-17.3627	-5.93363	-10.8134	-4.67362	-4.00976	-10.0773	-4.73623	-19.5711		5.30309	5.42581	6.69377	42.7793	6.55935	17.3627	5.93363	10.8134	4.67362	4.00976	10.0773	4.73623	19.5711
-5.60825	-8.90108	-11.3404	-12.8657	-6.43961	-21.8184	-8.6817	-6.96853	-5.46695	-5.41645	-6.35427	-12.056	-22.4409		5.60825	8.90108	11.3404	12.8657	6.43961	21.8184	8.6817	6.96853	5.46695	5.41645	6.35427	12.056	22.4409
-5.24196	-5.1168	-5.83598	-7.73015	-5.82943	-7.1107	-6.87469	-13.6836	-5.0397	-4.28586	-6.29325	-11.9927	-50.5801		5.24196	5.1168	5.83598	7.73015	5.82943	7.1107	6.87469	13.6836	5.0397	4.28586	6.29325	11.9927	50.5801
-7.86629	-13.0806	-5.62651	-6.37814	-6.01268	-6.38595	-5.17079	-11.5491	-10.1665	-6.19158	-6.47636	-15.2846	-9.1374		7.86629	13.0806	5.62651	6.37814	6.01268	6.38595	5.17079	11.5491	10.1665	6.19158	6.47636	15.2846	9.1374
-5.30278	-5.80281	-16.7238	-6.31691	-12.7877	-29.6415	-5.17277	-12.3443	-13.3402	-8.697	-7.39191	-8.14165	-5.41491		5.30278	5.80281	16.7238	6.31691	12.7877	29.6415	5.17277	12.3443	13.3402	8.697	7.39191	8.14165	5.41491
-5.85209	-5.3558	-20.0535	-6.37782	-6.74552	-5.05846	-11.039	-5.50859	-7.9687	-7.00263	-13.0073	-6.43146	-7.97982		5.85209	5.3558	20.0535	6.37782	6.74552	5.05846	11.039	5.50859	7.9687	7.00263	13.0073	6.43146	7.97982
-5.60747	-13.2148	-6.43959	-21.0259	-7.66121	-7.44059	-9.90726	-5.45005	-15.6591	-10.6868	-6.65961	-4.96565	-8.1044		5.60747	13.2148	6.43959	21.0259	7.66121	7.44059	9.90726	5.45005	15.6591	10.6868	6.65961	4.96565	8.1044
-5.24124	-5.14537	-6.19195	-6.12933	-6.68471	-21.909	-5.76683	-6.0056	-12.1188	-18.3798	-6.4156	-4.53804	-14.8186		5.24124	5.14537	6.19195	6.12933	6.68471	21.909	5.76683	6.0056	12.1188	18.3798	6.4156	4.53804	14.8186
-6.09559	-5.62605	-10.5191	-5.88183	-7.05499	-5.06352	-12.25	-4.54342	-5.52687	-18.8797	-10.8713	-11.3123	-14.7585		6.09559	5.62605	10.5191	5.88183	7.05499	5.06352	12.25	4.54342	5.52687	18.8797	10.8713	11.3123	14.7585
-5.72936	-10.1318	-5.26954	-11.9814	-16.0299	-6.2298	-7.00212	-17.2408	-6.80847	-12.7159	-8.3079	-4.35129	-4.44522		5.72936	10.1318	5.26954	11.9814	16.0299	6.2298	7.00212	17.2408	6.80847	12.7159	8.3079	4.35129	4.44522
-7.31565	-5.97494	-7.14988	-12.0972	-6.26531	-5.49787	-5.41647	-7.17056	-17.9169	-8.57859	-8.91828	-18.6329	-14.0285		7.31565	5.97494	7.14988	12.0972	6.26531	5.49787	5.41647	7.17056	17.9169	8.57859	8.91828	18.6329	14.0285
-5.97286	-10.3074	-5.54103	-9.40935	-6.4485	-13.0671	-8.9827	-7.29314	-8.21217	-6.81963	-9.71191	-11.3695	-18.9767		5.97286	10.3074	5.54103	9.40935	6.4485	13.0671	8.9827	7.29314	8.21217	6.81963	9.71191	11.3695	18.9767
-8.23076	-27.9358	-5.60182	-5.92298	-9.92798	-19.5409	-13.1354	-6.44165	-9.98199	-4.6292	-16.0596	-16.313	-4.26761		8.23076	27.9358	5.60182	5.92298	9.92798	19.5409	13.1354	6.44165	9.98199	4.6292	16.0596	16.313	4.26761
-5.48096	-15.6004	-11.3316	-7.7485	-6.20525	-5.07566	-4.54042	-12.424	-7.90659	-4.14107	-7.88099	-5.75387	-11.4097		5.48096	15.6004	11.3316	7.7485	6.20525	5.07566	4.54042	12.424	7.90659	4.14107	7.88099	5.75387	11.4097
-6.21246	-5.3883	-17.9008	-14.6435	-11.1501	-5.38085	-7.60003	-4.61351	-5.83138	-4.5111	-13.7404	-5.75381	-13.8522		6.21246	5.3883	17.9008	14.6435	11.1501	5.38085	7.60003	4.61351	5.83138	4.5111	13.7404	5.75381	13.8522
-14.573	-11.485	-12.5829	-8.17057	-7.48817	-8.06842	-4.60959	-10.5959	-4.54953	-11.7847	-18.6234	-51.591	-8.96958		14.573	11.485	12.5829	8.17057	7.48817	8.06842	4.60959	10.5959	4.54953	11.7847	18.6234	51.591	8.96958
-5.10034	-13.372	-5.74554	-12.3149	-8.77001	-6.00018	-15.6595	-6.08125	-9.67643	-8.21577	-10.2009	-13.8098	-16.5385		5.10034	13.372	5.74554	12.3149	8.77001	6.00018	15.6595	6.08125	9.67643	8.21577	10.2009	13.8098	16.5385
-6.68627	-19.5822	-8.54022	-14.6161	-12.6764	-8.26056	-5.77461	-8.88948	-6.07525	-9.87062	-14.0462	-5.32571	-14.9518		6.68627	19.5822	8.54022	14.6161	12.6764	8.26056	5.77461	8.88948	6.07525	9.87062	14.0462	5.32571	14.9518
-5.77072	-8.5023	-5.30379	-7.40769	-10.0581	-10.1536	-7.78902	-5.65479	-12.1786	-10.6716	-22.7133	-6.24107	-5.67455		5.77072	8.5023	5.30379	7.40769	10.0581	10.1536	7.78902	5.65479	12.1786	10.6716	22.7133	6.24107	5.67455
-7.90517	-7.0984	-5.42362	-23.2107	-6.64042	-15.7114	-7.97288	-7.66923	-9.37097	-4.08646	-6.29488	-5.56937	-18.0647		7.90517	7.0984	5.42362	23.2107	6.64042	15.7114	7.97288	7.66923	9.37097	4.08646	6.29488	5.56937	18.0647
-5.09573	-5.02305	-11.0239	-6.36324	-15.3715	-6.87363	-4.62164	-6.21109	-6.13588	-5.36937	-7.88187	-15.1389	-4.08771		5.09573	5.02305	11.0239	6.36324	15.3715	6.87363	4.62164	6.21109	6.13588	5.36937	7.88187	15.1389	4.08771
-5.70607	-6.9761	-5.16017	-8.79538	-9.45155	-8.27786	-4.50349	-15.9168	-10.591	-6.14625	-8.73642	-10.5046	-8.90952		5.70607	6.9761	5.16017	8.79538	9.45155	8.27786	4.50349	15.9168	10.591	6.14625	8.73642	10.5046	8.90952
-5.76705	-8.9844	-11.5661	-6.10559	-15.2521	-10.9041	-7.72167	-20.7389	-6.44046	-9.2018	-6.35605	-4.36364	-10.8018		5.76705	8.9844	11.5661	6.10559	15.2521	10.9041	7.72167	20.7389	6.44046	9.2018	6.35605	4.36364	10.8018
-5.46186	-10.3024	-7.69412	-7.3821	-17.0251	-21.8924	-4.8628	-8.47172	-17.5486	-6.98849	-6.35609	-5.75755	-7.50622		5.46186	10.3024	7.69412	7.3821	17.0251	21.8924	4.8628	8.47172	17.5486	6.98849	6.35609	5.75755	7.50622
-5.82806	-5.35835	-6.83328	-14.6987	-21.2385	-6.26906	-5.24629	-8.28913	-5.76818	-6.22997	-7.39369	-5.68275	-8.97253		5.82806	5.35835	6.83328	14.6987	21.2385	6.26906	5.24629	8.28913	5.76818	6.22997	7.39369	5.68275	8.97253
-6.07219	-6.01533	-9.57078	-8.95952	-7.07902	-5.53722	-6.04069	-5.54412	-5.9512	-4.17144	-22.4695	-5.8671	-10.6821		6.07219	6.01533	9.57078	8.95952	7.07902	5.53722	6.04069	5.54412	5.9512	4.17144	22.4695	5.8671	10.6821
-5.39993	-5.03594	-21.6454	-7.97762	-7.02232		-5.07396	-4.56757	-8.27012	-10.0477	-15.3895		-10.255		5.39993	5.03594	21.6454	7.97762	7.02232		5.07396	4.56757	8.27012	10.0477	15.3895		10.255
-6.07114	-24.4269	-11.6312	-14.9344	-20.3351		-5.19785	-5.9721	-5.34018	-15.0269	-8.9809		-9.401		6.07114	24.4269	11.6312	14.9344	20.3351		5.19785	5.9721	5.34018	15.0269	8.9809		9.401
-11.4417	-5.98543	-5.22216	-6.01989	-9.85172		-8.8032	-6.03512	-11.5045	-4.77469	-8.30966		-18.4959		11.4417	5.98543	5.22216	6.01989	9.85172		8.8032	6.03512	11.5045	4.77469	8.30966		18.4959
-6.00956	-28.5041	-8.43618	-9.06907	-5.89805		-7.15608	-4.99983	-10.2226	-11.1321	-8.30988		-5.43465		6.00956	28.5041	8.43618	9.06907	5.89805		7.15608	4.99983	10.2226	11.1321	8.30988		5.43465
-6.19265	-6.51999	-7.5698	-6.68689	-6.38647		-4.7179	-12.6908	-9.67321	-4.9729	-8.12701		-4.03085		6.19265	6.51999	7.5698	6.68689	6.38647		4.7179	12.6908	9.67321	4.9729	8.12701		4.03085
-5.094	-5.35455	-12.5085	-8.20822	-12.4901		-7.40455	-5.06183	-4.54596	-4.31625	-6.72367		-22.5246		5.094	5.35455	12.5085	8.20822	12.4901		7.40455	5.06183	4.54596	4.31625	6.72367		22.5246
-6.68091	-5.77995	-5.06204	-26.6386	-12.8564		-5.39575	-5.36907	-11.1985	-4.29184	-10.3865		-8.05997		6.68091	5.77995	5.06204	26.6386	12.8564		5.39575	5.36907	11.1985	4.29184	10.3865		8.05997
-5.46019	-8.70478	-9.56074	-6.49681	-7.3636		-12.7204	-5.7974	-4.85078	-5.04452	-7.33501		-10.3185		5.46019	8.70478	9.56074	6.49681	7.3636		12.7204	5.7974	4.85078	5.04452	7.33501		10.3185
-7.53537	-16.0692	-16.6278	-5.82013	-20.7958		-7.129	-5.79841	-5.94939	-4.19017	-21.4342		-9.89155		7.53537	16.0692	16.6278	5.82013	20.7958		7.129	5.79841	5.94939	4.19017	21.4342		9.89155
-6.61976	-25.8933	-6.23193	-8.20005	-8.71122		-11.5522	-6.53228	-4.85065	-6.12052	-15.0256		-4.5816		6.61976	25.8933	6.23193	8.20005	8.71122		11.5522	6.53228	4.85065	6.12052	15.0256		4.5816
-5.03283	-12.8897	-8.15589	-11.6784	-6.45298		-9.7828	-7.93695	-8.63453	-4.10685	-12.4623		-5.13254		5.03283	12.8897	8.15589	11.6784	6.45298		9.7828	7.93695	8.63453	4.10685	12.4623		5.13254
-5.09322	-10.5629	-5.22297	-6.91622	-6.39537		-4.65945	-5.25219	-10.2822	-24.6813	-32.8482		-14.5324		5.09322	10.5629	5.22297	6.91622	6.39537		4.65945	5.25219	10.2822	24.6813	32.8482		14.5324
-5.52046	-5.55619	-7.52643	-8.8651	-6.16991		-10.71	-5.3159	-8.02386	-4.23651	-6.72516		-5.74493		5.52046	5.55619	7.52643	8.8651	6.16991		10.71	5.3159	8.02386	4.23651	6.72516		5.74493
-5.5204	-6.16264	-13.6989	-8.8023	-11.7378		-5.22181	-6.10948	-4.72794	-15.7351	-11.3638		-10.2636		5.5204	6.16264	13.6989	8.8023	11.7378		5.22181	6.10948	4.72794	15.7351	11.3638		10.2636
-12.5987	-14.6386	-6.0503	-16.9187	-7.77516		-10.5947	-16.1806	-6.25381	-5.48158	-18.1389		-12.2779		12.5987	14.6386	6.0503	16.9187	7.77516		10.5947	16.1806	6.25381	5.48158	18.1389		12.2779
-5.82373	-6.33123	-6.96364	-9.16368	-23.6394		-6.32368	-5.56198	-16.9959	-7.43545	-8.12932		-12.7074		5.82373	6.33123	6.96364	9.16368	23.6394		6.32368	5.56198	16.9959	7.43545	8.12932		12.7074
-5.51855	-5.11048	-6.56087	-8.00324	-8.62124		-4.68701	-5.98924	-8.81714	-9.33024	-6.4204		-12.1584		5.51855	5.11048	6.56087	8.00324	8.62124		4.68701	5.98924	8.81714	9.33024	6.4204		12.1584
-5.33437	-8.27368	-5.6394	-6.59223	-5.93197		-7.19176	-6.60313	-14.1882	-26.3667	-9.8995		-4.89566		5.33437	8.27368	5.6394	6.59223	5.93197		7.19176	6.60313	14.1882	26.3667	9.8995		4.89566
-5.27291	-5.08818	-26.1511	-6.95114	-18.0779		-5.67367	-8.92253	-6.07041	-5.49717	-15.393		-8.37524		5.27291	5.08818	26.1511	6.95114	18.0779		5.67367	8.92253	6.07041	5.49717	15.393		8.37524
-35.1187	-15.489	-21.0549	-6.76594	-7.51641		-4.94284	-4.83412	-7.77937		-11.1205		-9.84084		35.1187	15.489	21.0549	6.76594	7.51641		4.94284	4.83412	7.77937		11.1205		9.84084
-5.02742	-8.94089	-8.17538	-11.3266	-13.6784		-8.13024	-10.3283	-15.2867		-16.1255		-11.0622		5.02742	8.94089	8.17538	11.3266	13.6784		8.13024	10.3283	15.2867		16.1255		11.0622
-6.9195	-19.9035	-5.91385	-19.6167	-5.98791		-7.52057	-5.69251	-4.9716		-8.80146		-4.65498		6.9195	19.9035	5.91385	19.6167	5.98791		7.52057	5.69251	4.9716		8.80146		4.65498
-5.33257	-6.09634	-5.29641	-19.2448	-9.89016		-29.8008	-8.01274	-5.76501		-6.42131		-4.04464		5.33257	6.09634	5.29641	19.2448	9.89016		29.8008	8.01274	5.76501		6.42131		4.04464
-5.02739	-6.15726	-6.63814	-6.42354	-9.15348		-6.73144	-9.72297	-9.6102		-6.66546		-26.9939		5.02739	6.15726	6.63814	6.42354	9.15348		6.73144	9.72297	9.6102		6.66546		26.9939
-5.14945	-5.72997	-5.79882	-10.5111	-6.4679		-7.89297	-6.5565	-8.32845		-13.3183		-4.04474		5.14945	5.72997	5.79882	10.5111	6.4679		7.89297	6.5565	8.32845		13.3183		4.04474
-5.02662	-6.705	-24.1654	-7.032	-6.95071		-11.2596	-4.60357	-17.9108		-6.11622		-8.19822		5.02662	6.705	24.1654	7.032	6.95071		11.2596	4.60357	17.9108		6.11622		8.19822
-6.79663	-9.02236	-16.9395	-17.1006	-13.8448		-9.67284	-7.04706	-16.3844		-6.36044		-8.25953		6.79663	9.02236	16.9395	17.1006	13.8448		9.67284	7.04706	16.3844		6.36044		8.25953
-5.51488	-12.5585	-6.60056	-7.02683	-11.0352		-9.0684	-7.17067	-14.0649		-8.61875		-13.3865		5.51488	12.5585	6.60056	7.02683	11.0352		9.0684	7.17067	14.0649		8.61875		13.3865
-7.95211	-9.50151	-6.84359	-7.87066	-25.922		-5.24256	-8.87977	-8.57151		-19.2999		-11.6778		7.95211	9.50151	6.84359	7.87066	25.922		5.24256	8.87977	8.57151		19.2999		11.6778
-5.51068	-7.16914	-8.6735	-9.45304	-6.87874		-12.0811	-29.3908	-6.06897		-13.6848		-15.218		5.51068	7.16914	8.6735	9.45304	6.87874		12.0811	29.3908	6.06897		13.6848		15.218
-7.46328	-6.04299	-13.3718	-10.1188	-13.1642		-6.84641	-7.05446	-4.97029		-15.3939		-6.12381		7.46328	6.04299	13.3718	10.1188	13.1642		6.84641	7.05446	4.97029		15.3939		6.12381
-5.63219	-5.10417	-10.7351	-11.5806	-15.5428		-5.2064	-5.71365	-16.811		-7.64244		-24.7401		5.63219	5.10417	10.7351	11.5806	15.5428		5.2064	5.71365	16.811		7.64244		24.7401
-5.44907	-18.4521	-9.59894	-6.31409	-11.3892		-12.2991	-4.67662	-5.8247		-10.8164		-6.49106		5.44907	18.4521	9.59894	6.31409	11.3892		12.2991	4.67662	5.8247		10.8164		6.49106
-5.26243	-7.77041	-5.65787	-5.8228	-7.05148		-4.60942	-7.4234	-5.09208		-14.5398		-5.33168		5.26243	7.77041	5.65787	5.8228	7.05148		4.60942	7.4234	5.09208		14.5398		5.33168
-9.95901		-11.0571	-6.00006	-11.5018		-4.61032	-10.9639	-10.646		-8.43633		-7.04187		9.95901		11.0571	6.00006	11.5018		4.61032	10.9639	10.646		8.43633		7.04187
-5.19824		-11.5739	-5.81691	-6.0021		-5.90595	-13.5886	-5.57964		-12.7088		-10.2159		5.19824		11.5739	5.81691	6.0021		5.90595	13.5886	5.57964		12.7088		10.2159
-5.62548		-14.9869	-6.48373	-28.2774		-9.27482	-4.98329	-16.9321		-7.0936		-6.79801		5.62548		14.9869	6.48373	28.2774		9.27482	4.98329	16.9321		7.0936		6.79801
-5.869		-6.43042	-12.4033	-8.68477		-4.51736	-6.02099	-6.73917		-7.03297		-9.11742		5.869		6.43042	12.4033	8.68477		4.51736	6.02099	6.73917		7.03297		9.11742
-12.03		-12.4963	-7.69878	-21.8058		-6.23574	-20.3646	-13.8191		-8.13181		-8.14197		12.03		12.4963	7.69878	21.8058		6.23574	20.3646	13.8191		8.13181		8.14197
-6.10956		-18.9046	-6.04992	-6.18013		-4.95465	-6.69495	-4.84667		-7.88771		-5.1536		6.10956		18.9046	6.04992	6.18013		4.95465	6.69495	4.84667		7.88771		5.1536
-9.77105		-9.49623	-7.57298	-6.72942		-11.4943	-15.0572	-11.9265		-12.4044		-5.88698		9.77105		9.49623	7.57298	6.72942		11.4943	15.0572	11.9265		12.4044		5.88698
-7.87849		-20.0442	-13.4213	-8.49087		-16.63	-6.69566	-7.2268		-23.5741		-10.709		7.87849		20.0442	13.4213	8.49087		16.63	6.69566	7.2268		23.5741		10.709
-5.49572		-5.56517	-12.4998	-7.81849		-8.27532	-4.86538	-11.3772		-9.59705		-4.11718		5.49572		5.56517	12.4998	7.81849		8.27532	4.86538	11.3772		9.59705		4.11718
-5.19053		-6.27962	-15.1238	-5.9859		-6.26903	-5.53985	-6.3717		-9.10882		-4.9759		5.19053		6.27962	15.1238	5.9859		6.26903	5.53985	6.3717		9.10882		4.9759
-7.02157		-8.64833	-7.24681	-11.8388		-5.42514	-7.31229	-13.6957		-6.17917		-4.06159		7.02157		8.64833	7.24681	11.8388		5.42514	7.31229	13.6957		6.17917		4.06159
-5.25154		-5.21568	-8.89402	-8.47907		-7.88519	-5.48338	-16.8694		-8.37675		-5.40448		5.25154		5.21568	8.89402	8.47907		7.88519	5.48338	16.8694		8.37675		5.40448
-5.49563		-10.5219	-17.8002	-7.25824		-4.71656	-8.78453	-5.21132		-14.5414		-4.42836		5.49563		10.5219	17.8002	7.25824		4.71656	8.78453	5.21132		14.5414		4.42836
-6.16607		-8.1924	-12.6017	-7.49609		-8.83548	-6.40453	-4.90606		-10.1472		-34.2751		6.16607		8.1924	12.6017	7.49609		8.83548	6.40453	4.90606		10.1472		34.2751
-5.1895		-5.50115	-6.06829	-7.37351		-5.79211	-15.1333	-16.5024		-24.3685		-26.8907		5.1895		5.50115	6.06829	7.37351		5.79211	15.1333	16.5024		24.3685		26.8907
-5.12713		-12.5088	-6.49535	-8.16348		-4.69476	-6.59015	-5.02758		-22.2936		-16.2706		5.12713		12.5088	6.49535	8.16348		4.69476	6.59015	5.02758		22.2936		16.2706
-5.24532		-10.3698	-13.1477	-11.7034		-11.3491	-12.0853	-5.39358		-12.6502		-6.01693		5.24532		10.3698	13.1477	11.7034		11.3491	12.0853	5.39358		12.6502		6.01693
-11.4676		-7.18489	-6.06755	-8.59017		-16.7839	-5.06891	-7.71287		-7.15719		-28.417		11.4676		7.18489	6.06755	8.59017		16.7839	5.06891	7.71287		7.15719		28.417
-6.58462		-10.7797	-5.82338	-5.96307		-5.31311	-5.74082	-4.72214		-20.0967		-8.40028		6.58462		10.7797	5.82338	5.96307		5.31311	5.74082	4.72214		20.0967		8.40028
-6.21689		-11.6067	-18.1515	-21.5842		-7.63437	-7.75547	-5.57662		-7.15751		-29.7016		6.21689		11.6067	18.1515	21.5842		7.63437	7.75547	5.57662		7.15751		29.7016
-5.11825		-9.58272	-9.3593	-6.79479		-5.49885	-6.2298	-13.8774		-11.0638		-8.95024		5.11825		9.58272	9.3593	6.79479		5.49885	6.2298	13.8774		11.0638		8.95024
-5.23985		-5.65162	-8.01588	-5.81731		-7.89547	-4.88705	-4.72208		-12.1015		-10.7823		5.23985		5.65162	8.01588	5.81731		7.89547	4.88705	4.72208		12.1015		10.7823
-5.6019		-5.12201	-7.15732	-14.1176		-5.70044	-4.70439			-7.76804		-4.61843		5.6019		5.12201	7.15732	14.1176		5.70044	4.70439			7.76804		4.61843
-6.3903		-20.4198	-9.71945	-33.9526		-6.79923	-4.76572			-14.482		-12.492		6.3903		20.4198	9.71945	33.9526		6.79923	4.76572			14.482		12.492
-7.48413		-5.53946	-5.93392	-8.13406		-4.72423	-7.33085			-15.7027		-4.49956		7.48413		5.53946	5.93392	8.13406		4.72423	7.33085			15.7027		4.49956
-9.06551		-6.94467	-33.7656	-11.2465		-5.77355	-9.89455			-9.11126		-9.50508		9.06551		6.94467	33.7656	11.2465		5.77355	9.89455			9.11126		9.50508
-13.3364		-5.39425	-6.05541	-7.583		-6.0921	-12.2763			-9.41652		-24.0938		13.3364		5.39425	6.05541	7.583		6.0921	12.2763			9.41652		24.0938
-5.46161		-6.91698	-13.6158	-19.2987		-5.11567	-10.9336			-9.29446		-8.95904		5.46161		6.91698	13.6158	19.2987		5.11567	10.9336			9.29446		8.95904
-11.7451		-6.14892	-7.19897	-8.43399		-4.69718	-9.22561			-43.5963		-4.68736		11.7451		6.14892	7.19897	8.43399		4.69718	9.22561			43.5963		4.68736
-5.03118		-5.31322	-41.8017	-5.93059		-9.21504	-4.59106			-9.29462		-12.5618		5.03118		5.31322	41.8017	5.93059		9.21504	4.59106			9.29462		12.5618
		-6.80893	-6.15697	-16.2368		-6.10914	-14.4184			-10.2104		-24.4049				6.80893	6.15697	16.2368		6.10914	14.4184			10.2104		24.4049
		-22.1205	-6.58406	-5.85978		-9.34613	-5.02499			-7.40281		-5.91484				22.1205	6.58406	5.85978		9.34613	5.02499			7.40281		5.91484
		-11.8693	-7.36945	-28.8694		-6.48858	-6.73443			-18.4502		-6.40759				11.8693	7.36945	28.8694		6.48858	6.73443			18.4502		6.40759
			-8.27944	-6.83495		-5.69884	-13.0827			-8.80705		-4.1493					8.27944	6.83495		5.69884	13.0827			8.80705		4.1493
			-7.60064	-22.765		-4.73549	-4.72216			-6.976		-11.718					7.60064	22.765		4.73549	4.72216			6.976		11.718
			-11.4451	-11.2287		-5.2892	-5.3965			-6.18277		-13.9157					11.4451	11.2287		5.2892	5.3965			6.18277		13.9157
			-7.84391	-22.5803		-4.57698	-5.09253			-7.03733		-4.70115					7.84391	22.5803		4.57698	5.09253			7.03733		4.70115
			-6.55984	-6.52737		-10.0103	-10.0367			-7.2815		-5.31174					6.55984	6.52737		10.0103	10.0367			7.2815		5.31174
			-8.26243	-7.68566		-5.01765	-6.74447			-7.15947		-9.03715					8.26243	7.68566		5.01765	6.74447			7.15947		9.03715
			-6.55327	-15.3675		-25.0414	-9.55356			-6.85585		-9.77014					6.55327	15.3675		25.0414	9.55356			6.85585		9.77014
			-15.5852	-10.2399		-5.08443	-10.1645			-8.07662		-5.74204					15.5852	10.2399		5.08443	10.1645			8.07662		5.74204
			-12.5865	-13.5278		-8.93519	-4.54953			-6.24562		-5.07067					12.5865	13.5278		8.93519	4.54953			6.24562		5.07067
			-7.45253	-14.5644		-7.5329	-4.85659			-8.44295		-5.62019					7.45253	14.5644		7.5329	4.85659			8.44295		5.62019
			-9.40379	-7.11804		-7.90326	-5.16545			-6.97828		-14.4707					9.40379	7.11804		7.90326	5.16545			6.97828		14.4707
			-6.0422	-8.5143		-7.1756	-11.819			-9.90821		-15.2037					6.0422	8.5143		7.1756	11.819			9.90821		15.2037
			-6.89249	-12.2356		-4.91752	-9.56258			-19.0638		-8.79511					6.89249	12.2356		4.91752	9.56258			19.0638		8.79511
			-15.3738	-9.6108		-6.87208	-5.47509			-7.58936		-5.01105					15.3738	9.6108		6.87208	5.47509			7.58936		5.01105
			-8.88545	-6.61979		-7.48422	-13.2271			-8.1391		-4.21828					8.88545	6.61979		7.48422	13.2271			8.1391		4.21828
			-6.26088	-16.0758		-12.6745	-7.24676			-6.00292		-13.0088					6.26088	16.0758		12.6745	7.24676			6.00292		13.0088
			-18.8247	-10.7542		-8.42959	-7.24681			-7.95605		-15.8775					18.8247	10.7542		8.42959	7.24681			7.95605		15.8775
			-7.22667	-6.53865		-5.98855	-5.66016			-20.1021		-33.2116					7.22667	6.53865		5.98855	5.66016			20.1021		33.2116
			-7.8972	-5.98805		-8.0732	-5.11087			-10.0923		-18.0139					7.8972	5.98805		8.0732	5.11087			10.0923		18.0139
			-5.94401	-12.0299			-4.56162			-29.0743		-47.6163					5.94401	12.0299			4.56162			29.0743		47.6163
			-11.1922	-5.98666			-4.6837			-8.38341		-4.34256					11.1922	5.98666			4.6837			8.38341		4.34256
			-6.12596	-9.09859			-6.57607			-22.6046		-4.71035					6.12596	9.09859			6.57607			22.6046		4.71035
			-18.8753	-6.84			-4.62301			-6.30826		-7.33598					18.8753	6.84			4.62301			6.30826		7.33598
			-7.33718	-6.34742			-5.5386			-29.8069		-14.2952					7.33718	6.34742			5.5386			29.8069		14.2952
			-5.98196	-21.4796			-4.74567			-10.2147		-5.50709					5.98196	21.4796			4.74567			10.2147		5.50709
			-9.09422	-7.07279			-9.68971			-7.16294		-7.76554					9.09422	7.07279			9.68971			7.16294		7.76554
			-6.28537	-21.1706			-7.67595			-9.72644		-32.671					6.28537	21.1706			7.67595			9.72644		32.671
			-6.59046	-6.69868			-7.67683			-7.52927		-4.77815					6.59046	6.69868			7.67683			7.52927		4.77815
			-9.45342	-11.8839			-6.94799			-7.34624		-9.05072					9.45342	11.8839			6.94799			7.34624		9.05072
			-6.33762	-22.2565			-9.51166			-16.4407		-24.5539					6.33762	22.2565			9.51166			16.4407		24.5539
			-6.15056	-8.39694			-9.8802			-8.01785		-5.69444					6.15056	8.39694			9.8802			8.01785		5.69444
			-6.02756	-9.67653			-7.31812			-6.36999		-7.22181					6.02756	9.67653			7.31812			6.36999		7.22181
			-5.81936	-13.825			-6.03655			-9.05577		-6.85683					5.81936	13.825			6.03655			9.05577		6.85683
			-12.5308	-13.3957			-10.1274			-8.56757		-4.72158					12.5308	13.3957			10.1274			8.56757		4.72158
			-17.1578	-6.74229			-23.3146			-11.1312		-11.4356					17.1578	6.74229			23.3146			11.1312		11.4356
			-15.2655	-6.37483			-4.57687			-7.40816		-7.59044					15.2655	6.37483			4.57687			7.40816		7.59044
			-12.3961	-8.9381			-16.2348			-8.20187		-13.9995					12.3961	8.9381			16.2348			8.20187		13.9995
			-7.75556	-7.59518			-6.04444			-6.18775		-4.17391					7.75556	7.59518			6.04444			6.18775		4.17391
			-12.1379	-7.65247			-12.2717			-7.77488		-7.59382					12.1379	7.65247			12.2717			7.77488		7.59382
			-7.19228	-6.67549			-20.0843			-6.98155		-14.9794					7.19228	6.67549			20.0843			6.98155		14.9794
			-18.167	-6.8505			-12.028			-10.5217		-7.83894					18.167	6.8505			12.028			10.5217		7.83894
			-6.50079	-9.04504			-4.76633			-15.0386		-4.23872					6.50079	9.04504			4.76633			15.0386		4.23872
			-13.332	-7.20931			-5.19746			-7.22677		-22.7326					13.332	7.20931			5.19746			7.22677		22.7326
			-8.81085	-9.5894			-8.92281			-7.2269		-8.51195					8.81085	9.5894			8.92281			7.2269		8.51195
			-13.9291	-10.4437			-11.4256			-14.063		-10.5265					13.9291	10.4437			11.4256			14.063		10.5265
			-16.5528	-19.1082			-5.13904			-6.43362		-10.4053					16.5528	19.1082			5.13904			6.43362		10.4053
			-6.78068	-28.2012			-5.3832			-20.3497		-4.36371					6.78068	28.2012			5.3832			20.3497		4.36371
			-6.22404	-7.69119			-4.71192			-14.3686		-26.8248					6.22404	7.69119			4.71192			14.3686		26.8248
			-9.27144	-8.60615			-4.9587			-7.10561		-16.632					9.27144	8.60615			4.9587			7.10561		16.632
			-11.2244	-14.2803			-8.31637			-6.61782		-7.84312					11.2244	14.2803			8.31637			6.61782		7.84312
			-15.617	-9.09223			-31.2047			-12.1721		-11.4476					15.617	9.09223			31.2047			12.1721		11.4476
			-7.30486	-13.7919			-5.75686			-16.5057		-9.55607					7.30486	13.7919			5.75686			16.5057		9.55607
			-7.11881	-9.64081			-6.85609			-8.93737		-16.1481					7.11881	9.64081			6.85609			8.93737		16.1481
			-7.54228	-7.32124			-4.84246			-7.65617		-7.84759					7.54228	7.32124			4.84246			7.65617		7.84759
			-12.1192	-18.4234			-5.63606			-6.8017		-7.97019					12.1192	18.4234			5.63606			6.8017		7.97019
				-8.16752			-7.77489			-11.4405		-18.1022						8.16752			7.77489			11.4405		18.1022
				-10.6694			-5.33408			-8.26697		-17.1264						10.6694			5.33408			8.26697		17.1264
				-8.65425			-5.27361			-17.3617		-7.91023						8.65425			5.27361			17.3617		7.91023
				-14.695			-6.68258			-6.37543		-8.70385						14.695			6.68258			6.37543		8.70385
				-9.68517			-4.7917			-8.38968		-6.38476						9.68517			4.7917			8.38968		6.38476
				-9.56236			-10.5907			-6.31457		-4.31						9.56236			10.5907			6.31457		4.31
				-6.44345			-6.07494			-6.49768		-16.5785						6.44345			6.07494			6.49768		16.5785
				-11.2575			-4.61163			-6.13149		-6.69252						11.2575			4.61163			6.13149		6.69252
				-6.80172			-8.33484			-19.4373		-8.40162						6.80172			8.33484			19.4373		8.40162
				-23.0882			-13.7685			-14.0666		-6.32692						23.0882			13.7685			14.0666		6.32692
				-10.0259			-10.2287			-11.7473		-5.65576						10.0259			10.2287			11.7473		5.65576
				-6.15897			-5.04083			-6.43752		-7.18184						6.15897			5.04083			6.43752		7.18184
							-4.97984			-18.4617		-29.0334									4.97984			18.4617		29.0334
							-4.79753			-8.94036		-12.5543									4.79753			8.94036		12.5543
							-5.47036			-19.3164		-14.5686									5.47036			19.3164		14.5686
										-6.01096		-15.8508												6.01096		15.8508
										-6.19413		-13.8369												6.19413		13.8369
										-19.8662		-27.3882												19.8662		27.3882
										-8.33095		-17.4397												8.33095		17.4397
										-6.62198		-10.7262												6.62198		10.7262
										-20.416		-10.4826												20.416		10.4826
										-17.1813		-21.0423												17.1813		21.0423
										-8.75872		-5.35659												8.75872		5.35659
										-17.853		-4.07485												17.853		4.07485
										-6.92788		-5.90683												6.92788		5.90683
										-6.7451		-12.6214												6.7451		12.6214
										-11.4448		-14.5747												11.4448		14.5747
										-6.74524		-6.39641												6.74524		6.39641
										-14.4967		-5.29849												14.4967		5.29849
										-9.61416		-4.38331												9.61416		4.38331
										-6.37939		-4.68849												6.37939		4.68849
										-15.4737		-4.44504												15.4737		4.44504
										-10.53		-6.46127												10.53		6.46127
										-8.27262		-7.98795												8.27262		7.98795
										-6.86915		-4.08516												6.86915		4.08516
										-15.8414		-17.2691												15.8414		17.2691
										-15.2311		-8.72607												15.2311		8.72607
										-8.09017		-5.73631												8.09017		5.73631
										-13.1562		-12.878												13.1562		12.878
										-14.6821		-13.6106												14.6821		13.6106
										-7.54105		-7.9956												7.54105		7.9956
										-9.25088		-9.5832												9.25088		9.5832
										-7.90811		-10.3772												7.90811		10.3772
										-18.9557		-10.4388												18.9557		10.4388
										-8.64076		-30.1545												8.64076		30.1545
										-15.965		-16.971												15.965		16.971
										-6.0164		-5.86402												6.0164		5.86402
										-11.2656		-4.21672												11.2656		4.21672
										-7.54249		-10.0159												7.54249		10.0159
										-15.2331		-4.34077												15.2331		4.34077
										-12.548		-6.72124												12.548		6.72124
										-9.61852		-13.5574												9.61852		13.5574
										-6.26171		-11.666												6.26171		11.666
										-9.55767		-29.4885												9.55767		29.4885
										-15.6612		-5.19812												15.6612		5.19812
										-9.49667		-4.40467												9.49667		4.40467
										-6.93323		-15.6353												6.93323		15.6353
										-17.1874		-8.06697												17.1874		8.06697
										-6.20109		-23.57												6.20109		23.57
										-6.44564		-16.3687												6.44564		16.3687
										-15.1744														15.1744
										-7.60622														7.60622
										-23.4755														23.4755
										-12.7948														12.7948
										-19.5087														19.5087
										-9.01072														9.01072
										-25.6734														25.6734
										-18.2276														18.2276
										-8.15714														8.15714
										-6.08196														6.08196
										-8.64547														8.64547
										-8.15725														8.15725
										-14.505														14.505
										-6.08231														6.08231
										-7.18184														7.18184

## Sheet: wt_Dan
2022_09_09_0009	2022_09_09_0011	2022_09_07_0006	2022_09_07_0007	2022_09_07_0008	2022_09_07_0009	2022_09_07_0010	2022_09_07_0011	2022_09_07_0012	2022_09_07_0013	2022_09_07_0014	2022_09_07_0016
0-30s	0-30	0-30	0-30s	0-20s	0-30s	0-30s	30-60s	0-30s	0-30s	21-51s	0-30s
-5.51429	-6.70911	-5.9158	-10.3094	-7.58182	-13.1919	-6.76869	-9.41023	-16.5199	-4.63604	-6.70414	-6.59136		5.51429	6.70911	5.9158	10.3094	7.58182	13.1919	6.76869	9.41023	16.5199	4.63604	6.70414	6.59136
-7.82576	-4.26713	-7.11343	-6.52498	-7.99641	-8.94878	-5.75412	-4.76446	-4.06769	-6.95537	-15.573	-4.08321		7.82576	4.26713	7.11343	6.52498	7.99641	8.94878	5.75412	4.76446	4.06769	6.95537	15.573	4.08321
-6.18778	-6.08981	-11.3034	-4.21154	-24.926	-6.89602	-6.62962	-8.71806	-4.55591	-4.26983	-7.73351	-4.02114		6.18778	6.08981	11.3034	4.21154	24.926	6.89602	6.62962	8.71806	4.55591	4.26983	7.73351	4.02114
-3.68291	-3.64365	-5.37633	-5.3177	-6.78739	-7.03371	-6.55578	-10.279	-5.77591	-4.81914	-6.32534	-12.3137		3.68291	3.64365	5.37633	5.3177	6.78739	7.03371	6.55578	10.279	5.77591	4.81914	6.32534	12.3137
-3.72081	-20.4756	-6.15826	-5.07729	-21.459	-20.471	-6.06365	-6.43714	-12.0004	-8.66435	-5.02962	-9.79438		3.72081	20.4756	6.15826	5.07729	21.459	20.471	6.06365	6.43714	12.0004	8.66435	5.02962	9.79438
-4.19761	-4.11254	-6.24858	-4.92736	-9.99193	-6.67553	-5.7753	-4.98559	-8.64324	-13.303	-4.63271	-4.89731		4.19761	4.11254	6.24858	4.92736	9.99193	6.67553	5.7753	4.98559	8.64324	13.303	4.63271	4.89731
-7.48043	-3.9869	-6.3962	-5.65602	-7.13697	-5.30664	-7.67575	-4.20651	-4.73665	-4.94121	-16.3077	-12.7066		7.48043	3.9869	6.3962	5.65602	7.13697	5.30664	7.67575	4.20651	4.73665	4.94121	16.3077	12.7066
-5.72723	-5.38714	-5.21493	-5.3598	-5.29452	-11.1272	-5.16716	-4.32366	-5.16371	-12.1434	-11.4481	-4.71061		5.72723	5.38714	5.21493	5.3598	5.29452	11.1272	5.16716	4.32366	5.16371	12.1434	11.4481	4.71061
-14.48	-3.79332	-11.5227	-7.15695	-5.66699	-5.33973	-8.28306	-17.6523	-5.8936	-4.3919	-5.76553	-4.15813		14.48	3.79332	11.5227	7.15695	5.66699	5.33973	8.28306	17.6523	5.8936	4.3919	5.76553	4.15813
-4.68821	-8.96334	-6.76927	-11.8305	-7.7512	-5.0958	-10.1839	-5.78961	-6.86707	-7.13848	-10.6295	-8.17851		4.68821	8.96334	6.76927	11.8305	7.7512	5.0958	10.1839	5.78961	6.86707	7.13848	10.6295	8.17851
-7.89513	-17.5377	-8.16804	-6.33728	-15.0343	-9.42915	-16.4363	-6.44284	-6.43848	-6.58916	-7.92565	-5.36274		7.89513	17.5377	8.16804	6.33728	15.0343	9.42915	16.4363	6.44284	6.43848	6.58916	7.92565	5.36274
-5.48317	-5.7573	-9.72164	-5.38588	-17.911	-5.04897	-5.06399	-14.7525	-9.24603	-13.0589	-9.01886	-16.1193		5.48317	5.7573	9.72164	5.38588	17.911	5.04897	5.06399	14.7525	9.24603	13.0589	9.01886	16.1193
-3.5278	-18.3416	-6.76463	-4.34094	-10.1185	-10.2873	-6.72427	-12.7039	-29.0199	-5.12432	-5.83875	-5.17141		3.5278	18.3416	6.76463	4.34094	10.1185	10.2873	6.72427	12.7039	29.0199	5.12432	5.83875	5.17141
-4.21921	-6.7754	-7.25163	-5.34403	-23.3616	-16.3586	-5.24804	-8.26795	-10.2205	-4.45293	-4.54009	-4.48333		4.21921	6.7754	7.25163	5.34403	23.3616	16.3586	5.24804	8.26795	10.2205	4.45293	4.54009	4.48333
-13.1487	-7.13828	-4.87695	-8.92098	-12.2099	-6.5953	-5.46189	-6.28682	-4.41926	-5.49053	-11.2421	-9.72204		13.1487	7.13828	4.87695	8.92098	12.2099	6.5953	5.46189	6.28682	4.41926	5.49053	11.2421	9.72204
-4.71594	-24.7296	-4.52337	-9.20938	-6.93977	-9.17235	-8.6713	-5.17405	-9.54457	-4.63604	-8.11866	-17.6921		4.71594	24.7296	4.52337	9.20938	6.93977	9.17235	8.6713	5.17405	9.54457	4.63604	8.11866	17.6921
-8.59384	-4.90748	-7.02786	-5.54691	-5.65286	-9.86525	-7.47598	-7.36454	-4.04554	-11.1668	-7.25094	-10.6698		8.59384	4.90748	7.02786	5.54691	5.65286	9.86525	7.47598	7.36454	4.04554	11.1668	7.25094	10.6698
-5.63964	-3.73981	-9.60717	-6.43239	-8.24924	-5.08729	-7.61379	-6.3275	-5.69204	-5.55156	-6.67901	-11.8806		5.63964	3.73981	9.60717	6.43239	8.24924	5.08729	7.61379	6.3275	5.69204	5.55156	6.67901	11.8806
-3.51324	-9.29106	-6.7046	-8.56283	-5.03657	-5.16293	-8.37596	-13.7877	-5.08167	-5.67363	-12.0389	-7.83583		3.51324	9.29106	6.7046	8.56283	5.03657	5.16293	8.37596	13.7877	5.08167	5.67363	12.0389	7.83583
-3.4063	-3.57525	-4.58836	-5.14979	-5.37188	-8.93207	-5.07826	-4.62091	-10.0247	-7.8709	-4.56639	-4.22819		3.4063	3.57525	4.58836	5.14979	5.37188	8.93207	5.07826	4.62091	10.0247	7.8709	4.56639	4.22819
-5.76308	-4.2507	-9.14603	-15.4102	-8.46256	-6.21338	-10.7642	-4.68667	-8.80157	-8.17607	-7.15383	-10.6867		5.76308	4.2507	9.14603	15.4102	8.46256	6.21338	10.7642	4.68667	8.80157	8.17607	7.15383	10.6867
-4.35982	-8.99703	-5.9543	-6.41834	-12.1377	-12.192	-6.05836	-5.91935	-7.45774	-14.1575	-5.20811	-7.00738		4.35982	8.99703	5.9543	6.41834	12.1377	12.192	6.05836	5.91935	7.45774	14.1575	5.20811	7.00738
-3.56664	-8.10539	-5.15014	-5.30172	-15.0684	-9.03827	-10.2541	-4.52595	-4.95345	-8.72539	-7.73186	-23.1143		3.56664	8.10539	5.15014	5.30172	15.0684	9.03827	10.2541	4.52595	4.95345	8.72539	7.73186	23.1143
-7.6752	-24.9382	-46.9925	-8.44104	-7.68558	-10.3365	-8.28514	-4.05459	-4.52559	-11.6551	-10.2652	-5.35237		7.6752	24.9382	46.9925	8.44104	7.68558	10.3365	8.28514	4.05459	4.52559	11.6551	10.2652	5.35237
-6.33352	-4.24409	-6.61596	-4.87459	-5.13173	-5.69079	-10.6265	-16.4288	-5.07373	-6.71123	-4.32144	-6.14156		6.33352	4.24409	6.61596	4.87459	5.13173	5.69079	10.6265	16.4288	5.07373	6.71123	4.32144	6.14156
-3.61656	-7.37823	-17.2606	-5.29339	-14.2428	-8.57059	-6.39028	-6.77272	-5.56121	-7.68779	-4.42702	-4.18728		3.61656	7.37823	17.2606	5.29339	14.2428	8.57059	6.39028	6.77272	5.56121	7.68779	4.42702	4.18728
-12.4701	-3.85293	-7.77028	-4.24516	-7.57779	-6.11904	-7.12961	-4.26035	-4.76705	-6.58916	-8.66663	-4.60822		12.4701	3.85293	7.77028	4.24516	7.57779	6.11904	7.12961	4.26035	4.76705	6.58916	8.66663	4.60822
-3.84697	-6.55506	-13.046	-5.97291	-5.0403	-23.4966	-5.65185	-13.9131	-14.4099	-5.12432	-7.41288	-9.30479		3.84697	6.55506	13.046	5.97291	5.0403	23.4966	5.65185	13.9131	14.4099	5.12432	7.41288	9.30479
-5.47539	-9.23485	-4.32665	-10.3859	-7.79042	-16.3239	-14.4912	-4.67425	-11.7234	-6.10088	-5.20771	-7.95808		5.47539	9.23485	4.32665	10.3859	7.79042	16.3239	14.4912	4.67425	11.7234	6.10088	5.20771	7.95808
-4.19402	-4.2892	-4.80582	-8.10925	-9.44771	-7.18037	-8.25776	-6.33384	-4.88705	-10.3123	-10.665	-5.33067		4.19402	4.2892	4.80582	8.10925	9.44771	7.18037	8.25776	6.33384	4.88705	10.3123	10.665	5.33067
-4.87203	-3.73018	-6.07564	-7.85281	-5.70761	-7.00238	-8.71104	-8.81323	-5.12885	-4.51397	-13.6373	-9.89945		4.87203	3.73018	6.07564	7.85281	5.70761	7.00238	8.71104	8.81323	5.12885	4.51397	13.6373	9.89945
-5.30158	-4.97387	-5.3236	-4.52715	-8.66528	-14.0784	-7.40932	-5.63515	-5.18864	-5.36846	-4.282	-4.27779		5.30158	4.97387	5.3236	4.52715	8.66528	14.0784	7.40932	5.63515	5.18864	5.36846	4.282	4.27779
-5.35903	-9.62813	-10.9748	-11.9558	-6.3328	-5.05202	-5.39355	-7.51916	-7.32454	-4.88018	-4.32951	-10.0134		5.35903	9.62813	10.9748	11.9558	6.3328	5.05202	5.39355	7.51916	7.32454	4.88018	4.32951	10.0134
-4.23482	-3.47524	-4.89195	-12.1426	-13.7323	-5.09152	-5.425	-5.04072	-12.6954	-4.20879	-5.57552	-8.15821		4.23482	3.47524	4.89195	12.1426	13.7323	5.09152	5.425	5.04072	12.6954	4.20879	5.57552	8.15821
-11.7323	-5.68606	-4.26796	-5.49932	-13.0088	-5.02853	-8.45252	-4.04047	-5.30947	-4.33086	-14.1799	-4.1263		11.7323	5.68606	4.26796	5.49932	13.0088	5.02853	8.45252	4.04047	5.30947	4.33086	14.1799	4.1263
-10.0641	-3.66082	-4.77091	-9.35362	-15.1432	-14.4543	-9.50092	-4.00432	-13.3625	-5.85674	-4.45847	-4.85778		10.0641	3.66082	4.77091	9.35362	15.1432	14.4543	9.50092	4.00432	13.3625	5.85674	4.45847	4.85778
-3.53104	-3.7773	-8.21323	-7.66046	-5.287	-5.43912	-13.4495	-4.38233	-4.20565	-6.34502	-4.03074	-4.58336		3.53104	3.7773	8.21323	7.66046	5.287	5.43912	13.4495	4.38233	4.20565	6.34502	4.03074	4.58336
-3.77441	-3.41066	-6.05325	-6.3871	-5.13915	-9.86227	-5.45748	-5.22892	-6.52345	-6.58916	-4.82396	-10.5586		3.77441	3.41066	6.05325	6.3871	5.13915	9.86227	5.45748	5.22892	6.52345	6.58916	4.82396	10.5586
-3.40663	-12.0479	-12.7464	-10.5369	-6.68925	-5.24501	-5.00744	-17.9713	-4.56617	-8.66435	-6.54708	-5.78964		3.40663	12.0479	12.7464	10.5369	6.68925	5.24501	5.00744	17.9713	4.56617	8.66435	6.54708	5.78964
-6.38645	-13.9877	-11.081	-4.96412	-5.13015	-6.30602	-5.55758	-9.22005	-4.62673	-12.3875	-19.7251	-4.1403		6.38645	13.9877	11.081	4.96412	5.13015	6.30602	5.55758	9.22005	4.62673	12.3875	19.7251	4.1403
-5.71019	-3.46796	-19.8234	-6.15621	-6.85358	-5.46818	-5.18614	-11.5989	-18.6036	-4.3919	-17.2625	-12.7373		5.71019	3.46796	19.8234	6.15621	6.85358	5.46818	5.18614	11.5989	18.6036	4.3919	17.2625	12.7373
-12.0543	-3.61422	-8.286	-4.6832	-5.36916	-6.0407	-6.85568	-4.25672	-10.9737	-8.17607	-4.25006	-4.12037		12.0543	3.61422	8.286	4.6832	5.36916	6.0407	6.85568	4.25672	10.9737	8.17607	4.25006	4.12037
-4.42265	-5.408	-13.1318	-5.36155	-13.0601	-8.72022	-17.0713	-7.595	-7.9826	-5.73467	-6.74144	-21.6958		4.42265	5.408	13.1318	5.36155	13.0601	8.72022	17.0713	7.595	7.9826	5.73467	6.74144	21.6958
-13.08	-4.39114	-4.47501	-4.72093	-6.67424	-5.18412	-5.65061	-4.35441	-6.94466	-8.42021	-4.09645	-4.60528		13.08	4.39114	4.47501	4.72093	6.67424	5.18412	5.65061	4.35441	6.94466	8.42021	4.09645	4.60528
-3.46108	-11.1864	-6.13528	-6.91605	-5.19701	-9.29072	-9.0268	-5.13949	-5.05191	-4.33086	-4.75743	-4.4119		3.46108	11.1864	6.13528	6.91605	5.19701	9.29072	9.0268	5.13949	5.05191	4.33086	4.75743	4.4119
-6.45001	-4.59295	-5.11987	-7.43701	-9.12882	-23.5995	-5.37842	-5.57862	-4.92762	-4.51397	-6.38177	-6.72691		6.45001	4.59295	5.11987	7.43701	9.12882	23.5995	5.37842	5.57862	4.92762	4.51397	6.38177	6.72691
-7.64347	-3.42734	-6.14584	-4.39474	-11.1738	-10.8889	-5.55732	-7.30709	-8.95515	-7.50469	-4.03214	-9.83243		7.64347	3.42734	6.14584	4.39474	11.1738	10.8889	5.55732	7.30709	8.95515	7.50469	4.03214	9.83243
-11.7327	-6.05083	-4.78348	-14.4644	-6.43846	-9.45836	-6.30016	-4.89092	-4.31473	-4.33086	-14.2793	-27.7106		11.7327	6.05083	4.78348	14.4644	6.43846	9.45836	6.30016	4.89092	4.31473	4.33086	14.2793	27.7106
-4.46911	-5.77705	-4.7265	-4.3095	-8.03083	-5.76116	-17.8389	-4.24903	-5.7757	-5.18535	-4.14801	-5.42854		4.46911	5.77705	4.7265	4.3095	8.03083	5.76116	17.8389	4.24903	5.7757	5.18535	4.14801	5.42854
-7.82456	-5.77705	-6.15832	-6.72126	-8.52332	-6.21108	-8.01378	-16.1518	-5.40939	-4.26983	-5.24176	-4.20569		7.82456	5.77705	6.15832	6.72126	8.52332	6.21108	8.01378	16.1518	5.40939	4.26983	5.24176	4.20569
-3.79289	-6.63154	-7.82558	-4.20448	-19.3846	-13.4077	-15.1156	-6.92969	-5.10375	-5.36846	-4.02792	-4.50258		3.79289	6.63154	7.82558	4.20448	19.3846	13.4077	15.1156	6.92969	5.10375	5.36846	4.02792	4.50258
-4.02966	-4.98359	-4.42226	-4.23142	-9.49236	-7.11255	-9.35271	-7.22581	-4.00381	-5.00225	-4.64652	-11.2646		4.02966	4.98359	4.42226	4.23142	9.49236	7.11255	9.35271	7.22581	4.00381	5.00225	4.64652	11.2646
-3.7244	-6.57051	-5.81901	-4.68865	-5.73121	-9.11222	-5.10959	-7.44707	-5.65032	-7.80986	-4.42627	-10.5881		3.7244	6.57051	5.81901	4.68865	5.73121	9.11222	5.10959	7.44707	5.65032	7.80986	4.42627	10.5881
-3.60231	-5.53291	-4.52817	-10.4797	-14.1873	-5.7506	-7.17321	-6.93154	-5.34377	-7.93193	-17.0922	-13.7504		3.60231	5.53291	4.52817	10.4797	14.1873	5.7506	7.17321	6.93154	5.34377	7.93193	17.0922	13.7504
-8.78996	-3.64082	-10.3613	-4.37167	-9.03544	-6.77623	-5.70667	-5.17158	-5.03729	-16.5989	-12.7589	-9.10794		8.78996	3.64082	10.3613	4.37167	9.03544	6.77623	5.70667	5.17158	5.03729	16.5989	12.7589	9.10794
-18.5546	-4.1291	-4.39753	-6.39896	-5.16531	-14.7041	-13.1469	-16.5686	-15.7184	-5.30742	-4.0576	-6.17746		18.5546	4.1291	4.39753	6.39896	5.16531	14.7041	13.1469	16.5686	15.7184	5.30742	4.0576	6.17746
-3.84486	-4.98359	-6.05091	-10.604	-5.12245	-9.53203	-6.10011	-14.2024	-17.7319	-9.64092	-10.491	-4.52937		3.84486	4.98359	6.05091	10.604	5.12245	9.53203	6.10011	14.2024	17.7319	9.64092	10.491	4.52937
-10.2534	-10.2937	-5.40459	-5.67225	-5.86833	-6.84469	-11.5415	-6.65334	-4.54641	-11.1668	-4.08742	-4.34615		10.2534	10.2937	5.40459	5.67225	5.86833	6.84469	11.5415	6.65334	4.54641	11.1668	4.08742	4.34615
-3.60038	-10.1716	-4.21198	-11.881	-5.71994	-9.56466	-8.44738	-4.00928	-4.30196	-9.57988	-4.15842	-4.6432		3.60038	10.1716	4.21198	11.881	5.71994	9.56466	8.44738	4.00928	4.30196	9.57988	4.15842	4.6432
-9.21546	-3.51875	-10.2451	-7.09442	-5.59635	-5.50412	-9.34626	-5.36976	-25.1148	-16.1106	-6.23597	-4.27676		9.21546	3.51875	10.2451	7.09442	5.59635	5.50412	9.34626	5.36976	25.1148	16.1106	6.23597	4.27676
-4.51552	-3.51875	-4.35143	-8.65065	-5.10898	-10.5061	-5.84468	-8.38531	-9.24535	-5.85674	-4.37185	-5.13079		4.51552	3.51875	4.35143	8.65065	5.10898	10.5061	5.84468	8.38531	9.24535	5.85674	4.37185	5.13079
-6.83356	-3.57978	-6.91797	-4.88548	-6.64018	-13.5168	-6.7975	-6.30149	-4.4234	-10.6175	-5.89884	-5.00522		6.83356	3.57978	6.91797	4.88548	6.64018	13.5168	6.7975	6.30149	4.4234	10.6175	5.89884	5.00522
-4.5141	-10.0495	-4.70218	-6.92069	-6.28698	-7.16138	-7.07963	-4.89361	-7.29151	-5.85674	-4.10457	-4.02846		4.5141	10.0495	4.70218	6.92069	6.28698	7.16138	7.07963	4.89361	7.29151	5.85674	4.10457	4.02846
-12.5704	-3.76289	-5.16886	-9.01953	-5.22186	-11.8948	-6.26408	-7.58003	-8.0207	-5.12432	-4.35696	-10.8573		12.5704	3.76289	5.16886	9.01953	5.22186	11.8948	6.26408	7.58003	8.0207	5.12432	4.35696	10.8573
-3.47599	-7.425	-7.86492	-5.15939	-5.27696	-5.44756	-7.4086	-4.35288	-6.85974	-9.33574	-5.62556	-7.5609		3.47599	7.425	7.86492	5.15939	5.27696	5.44756	7.4086	4.35288	6.85974	9.33574	5.62556	7.5609
-5.0527	-6.87568	-4.58918	-4.2292	-5.16631	-8.24363	-7.48331	-5.35415	-11.8646	-4.14776	-5.6362	-4.19892		5.0527	6.87568	4.58918	4.2292	5.16631	8.24363	7.48331	5.35415	11.8646	4.14776	5.6362	4.19892
-3.64126	-3.51875	-4.72599	-4.4717	-5.15939	-6.89576	-5.26136	-9.15163	-12.7184	-13.6692	-8.51718	-4.50378		3.64126	3.51875	4.72599	4.4717	5.15939	6.89576	5.26136	9.15163	12.7184	13.6692	8.51718	4.50378
-3.94624	-5.47187	-4.62973	-5.18442	-5.8946	-7.17785	-6.25349	-14.1305	-6.24817	-4.69707	-4.94739	-4.44183		3.94624	5.47187	4.62973	5.18442	5.8946	7.17785	6.25349	14.1305	6.24817	4.69707	4.94739	4.44183
-5.47204	-3.94599	-6.94748	-4.70851	-6.23214	-7.81111	-5.20836	-6.16785	-5.63752	-4.63604	-16.4871	-4.31892		5.47204	3.94599	6.94748	4.70851	6.23214	7.81111	5.20836	6.16785	5.63752	4.63604	16.4871	4.31892
-6.63154	-3.64082	-4.54353	-4.39865	-5.00765	-14.2637	-10.7261	-7.7515	-6.00036	-13.0589	-6.21688	-6.5625		6.63154	3.64082	4.54353	4.39865	5.00765	14.2637	10.7261	7.7515	6.00036	13.0589	6.21688	6.5625
-3.51867	-3.64082	-4.76512	-7.4599	-5.73031	-12.3773	-6.08347	-6.29737	-4.71212	-17.8196	-6.64477	-4.60372		3.51867	3.64082	4.76512	7.4599	5.73031	12.3773	6.08347	6.29737	4.71212	17.8196	6.64477	4.60372
-3.75986	-5.59394	-10.2081	-8.67775	-5.26319	-6.18697	-6.04558	-8.31296	-4.34342	-6.22295	-5.02677	-8.20454		3.75986	5.59394	10.2081	8.67775	5.26319	6.18697	6.04558	8.31296	4.34342	6.22295	5.02677	8.20454
-3.48957	-6.02119	-4.38269	-4.20136	-7.80293	-5.50668	-9.97542	-8.51256	-4.15847	-10.3733	-5.13479	-4.23582		3.48957	6.02119	4.38269	4.20136	7.80293	5.50668	9.97542	8.51256	4.15847	10.3733	5.13479	4.23582
-4.03769	-4.3122	-5.5904	-14.5456	-5.77205	-23.6728	-10.1846	-5.53002	-21.248	-10.9837	-4.64533	-7.88752		4.03769	4.3122	5.5904	14.5456	5.77205	23.6728	10.1846	5.53002	21.248	10.9837	4.64533	7.88752
-3.97473	-4.25117	-4.39938	-4.46344	-17.0193	-5.42046	-12.2672	-7.77368	-4.88966	-4.08672	-4.00979	-16.7947		3.97473	4.25117	4.39938	4.46344	17.0193	5.42046	12.2672	7.77368	4.88966	4.08672	4.00979	16.7947
-3.66723	-11.8195	-4.50037	-5.01677	-22.4655	-5.33806	-5.28494	-8.36285	-6.29012	-22.0921	-13.8139	-4.15845		3.66723	11.8195	4.50037	5.01677	22.4655	5.33806	5.28494	8.36285	6.29012	22.0921	13.8139	4.15845
-6.77759	-6.44844	-5.14283	-10.0295	-5.68329	-5.82278	-16.7909	-7.96721	-5.49618	-5.74668	-12.0348	-6.03971		6.77759	6.44844	5.14283	10.0295	5.68329	5.82278	16.7909	7.96721	5.49618	5.74668	12.0348	6.03971
-3.72542	-11.4533	-4.33446	-5.13603	-6.0744	-5.8306	-7.59784	-6.5553	-6.77728	-4.61239	-6.66747	-7.92649		3.72542	11.4533	4.33446	5.13603	6.0744	5.8306	7.59784	6.5553	6.77728	4.61239	6.66747	7.92649
-5.54798	-6.50947	-9.41581	-14.7028	-5.02142	-14.4063	-7.15838	-5.9262	-4.8836	-5.40608	-5.20415	-11.7709		5.54798	6.50947	9.41581	14.7028	5.02142	14.4063	7.15838	5.9262	4.8836	5.40608	5.20415	11.7709
-7.37872	-11.9416	-5.75307	-8.9758	-15.297	-6.86761	-6.11398	-12.1224	-6.46937	-5.28999	-11.8577	-6.03048		7.37872	11.9416	5.75307	8.9758	15.297	6.86761	6.11398	12.1224	6.46937	5.28999	11.8577	6.03048
-4.7537	-3.45771	-6.94192	-24.7259	-5.19201	-15.1658	-6.471	-8.38777	-5.85882	-9.43135	-4.41736	-5.4788		4.7537	3.45771	6.94192	24.7259	5.19201	15.1658	6.471	8.38777	5.85882	9.43135	4.41736	5.4788
-4.13902	-4.49531	-6.44252	-10.3022	-5.96292	-5.10368	-8.34004	-4.39982	-5.42921	-7.71202	-4.11224	-4.0593		4.13902	4.49531	6.44252	10.3022	5.96292	5.10368	8.34004	4.39982	5.42921	7.71202	4.11224	4.0593
-4.86405	-3.76289	-7.95982	-9.92922	-5.14107	-5.45351	-6.76288	-6.42726	-9.45593	-4.419	-4.11538	-4.18092		4.86405	3.76289	7.95982	9.92922	5.14107	5.45351	6.76288	6.42726	9.45593	4.419	4.11538	4.18092
-3.58221	-5.47187	-5.5817	-11.569	-7.09603	-5.19754	-10.3497	-11.065	-4.75559	-7.90243	-4.30575	-4.17393		3.58221	5.47187	5.5817	11.569	7.09603	5.19754	10.3497	11.065	4.75559	7.90243	4.30575	4.17393
-12.7918	-3.45771	-7.41248	-6.35547	-20.8977	-6.57872	-5.11229	-4.00238	-4.6332	-9.05924	-13.833	-14.9128		12.7918	3.45771	7.41248	6.35547	20.8977	6.57872	5.11229	4.00238	4.6332	9.05924	13.833	14.9128
-3.99503	-3.88496	-5.95803	-10.7739	-5.20397	-5.3409	-7.59057	-7.01492	-5.73123	-6.4328	-4.38433	-9.23042		3.99503	3.88496	5.95803	10.7739	5.20397	5.3409	7.59057	7.01492	5.73123	6.4328	4.38433	9.23042
-7.04481	-3.70185	-6.18357	-11.1124	-12.6533	-5.1398	-5.15865	-7.05165	-4.44916	-16.8091	-19.8264	-8.79239		7.04481	3.70185	6.18357	11.1124	12.6533	5.1398	5.15865	7.05165	4.44916	16.8091	19.8264	8.79239
-15.4061	-3.76289	-5.16282	-4.92005	-7.07269	-6.16204	-6.24117	-4.15989	-7.98887	-4.35803	-11.8387	-5.18316		15.4061	3.76289	5.16282	4.92005	7.07269	6.16204	6.24117	4.15989	7.98887	4.35803	11.8387	5.18316
-5.94217	-8.09639	-5.58603	-4.82515	-5.20443	-5.6059	-9.99572	-15.2603	-12.0171	-8.32541	-4.08997	-8.17087		5.94217	8.09639	5.58603	4.82515	5.20443	5.6059	9.99572	15.2603	12.0171	8.32541	4.08997	8.17087
-5.57492	-20.1813	-5.5523	-5.56392	-16.2409	-9.82511	-12.775	-5.63391	-8.72108	-12.598	-4.02907	-4.01953		5.57492	20.1813	5.5523	5.56392	16.2409	9.82511	12.775	5.63391	8.72108	12.598	4.02907	4.01953
-6.84533	-3.88496	-4.36221	-6.8444	-8.24772	-9.25251	-12.878	-11.7807	-7.19466	-5.09477	-5.19034	-9.44927		6.84533	3.88496	4.36221	6.8444	8.24772	9.25251	12.878	11.7807	7.19466	5.09477	5.19034	9.44927
-3.72606	-5.71601	-4.21117	-8.12591	-6.52878	-7.67884	-10.7256	-5.04298	-8.17024	-4.61061	-4.15652	-5.35798		3.72606	5.71601	4.21117	8.12591	6.52878	7.67884	10.7256	5.04298	8.17024	4.61061	4.15652	5.35798
-5.91889	-7.48603	-4.76423	-21.1904	-20.0571	-9.59324	-5.38174	-12.725	-4.62902	-13.2788	-9.83341	-4.67883		5.91889	7.48603	4.76423	21.1904	20.0571	9.59324	5.38174	12.725	4.62902	13.2788	9.83341	4.67883
-4.33037	-7.425	-7.82581	-5.85697	-5.05197	-32.962	-19.1976	-4.18251	-6.52085	-4.85674	-6.59959	-5.03771		4.33037	7.425	7.82581	5.85697	5.05197	32.962	19.1976	4.18251	6.52085	4.85674	6.59959	5.03771
-8.40135	-12.4909	-4.52589	-5.68434	-15.6908	-5.803	-8.10967	-5.02042	-4.75032	-8.45789	-5.45066	-4.0498		8.40135	12.4909	4.52589	5.68434	15.6908	5.803	8.10967	5.02042	4.75032	8.45789	5.45066	4.0498
-3.63858	-3.70185	-5.452	-8.18013	-11.4838	-6.53932	-6.92916	-6.8858	-6.09272	-6.32238	-4.4161	-7.64532		3.63858	3.70185	5.452	8.18013	11.4838	6.53932	6.92916	6.8858	6.09272	6.32238	4.4161	7.64532
-6.44246	-7.11982	-6.2977	-8.74533	-5.4814	-5.68571	-5.10069	-4.10765	-14.7548	-6.38348	-5.2121	-4.1575		6.44246	7.11982	6.2977	8.74533	5.4814	5.68571	5.10069	4.10765	14.7548	6.38348	5.2121	4.1575
-3.55833	-20.5476	-14.3421	-11.5913	-5.51481	-6.24397	-7.07638	-4.37088	-4.19481	-5.96125	-5.82532	-4.52341		3.55833	20.5476	14.3421	11.5913	5.51481	6.24397	7.07638	4.37088	4.19481	5.96125	5.82532	4.52341
-4.71276	-3.76289	-8.49019	-4.88187	-5.88447	-14.7289	-7.46639	-8.83302	-7.549	-7.3065	-6.43679	-4.27436		4.71276	3.76289	8.49019	4.88187	5.88447	14.7289	7.46639	8.83302	7.549	7.3065	6.43679	4.27436
-10.2556	-3.51875	-18.409	-15.2275	-6.03825	-6.43382	-7.84876	-4.30995	-6.75273	-6.75906	-17.3644	-8.41019		10.2556	3.51875	18.409	15.2275	6.03825	6.43382	7.84876	4.30995	6.75273	6.75906	17.3644	8.41019
-5.9713	-4.3122	-19.9383	-12.2677	-8.30915	-5.46243	-9.24337	-5.25621	-4.67498	-5.66045	-4.73251	-9.32134		5.9713	4.3122	19.9383	12.2677	8.30915	5.46243	9.24337	5.25621	4.67498	5.66045	4.73251	9.32134
-8.9865	-4.80049	-5.08095	-6.04692	-6.41728	-5.64769	-7.01975	-18.3117	-4.36692	-9.8113	-4.80354	-8.58562		8.9865	4.80049	5.08095	6.04692	6.41728	5.64769	7.01975	18.3117	4.36692	9.8113	4.80354	8.58562
-5.07754	-9.13398	-4.6928	-5.07568	-5.58221	-5.58751	-5.36122	-6.27547	-5.5263	-4.19909	-4.13266	-5.65467		5.07754	9.13398	4.6928	5.07568	5.58221	5.58751	5.36122	6.27547	5.5263	4.19909	4.13266	5.65467
-3.61262	-4.1291	-10.6269	-7.41046	-7.214	-11.1525	-9.09058	-7.66041	-6.4407	-5.67193	-12.7432	-6.25391		3.61262	4.1291	10.6269	7.41046	7.214	11.1525	9.09058	7.66041	6.4407	5.67193	12.7432	6.25391
-10.1187	-4.19013	-13.4437	-17.026	-6.17798	-5.29681	-5.17996	-9.21144	-6.74564	-10.6218	-5.72426	-13.5073		10.1187	4.19013	13.4437	17.026	6.17798	5.29681	5.17996	9.21144	6.74564	10.6218	5.72426	13.5073
-4.96383	-8.27949	-6.26162	-6.62071	-8.51501	-7.74035	-5.12375	-4.60395	-14.3667	-5.93125	-13.0522	-6.27339		4.96383	8.27949	6.26162	6.62071	8.51501	7.74035	5.12375	4.60395	14.3667	5.93125	13.0522	6.27339
-3.43175	-8.03535	-7.25324	-4.48618	-9.22923	-11.7154	-7.32663	-16.9343	-6.0624	-10.4496	-16.6541	-4.99125		3.43175	8.03535	7.25324	4.48618	9.22923	11.7154	7.32663	16.9343	6.0624	10.4496	16.6541	4.99125
-5.01415	-12.4299	-8.12613	-4.27254	-7.02426	-6.9113	-8.35247	-9.09063	-5.5714	-4.77348	-7.25555	-4.92984		5.01415	12.4299	8.12613	4.27254	7.02426	6.9113	8.35247	9.09063	5.5714	4.77348	7.25555	4.92984
-4.58452	-4.06806	-5.67262	-4.47044	-6.78854	-6.24393	-10.6609	-6.4719	-4.22603	-4.04458	-5.4322	-4.92849		4.58452	4.06806	5.67262	4.47044	6.78854	6.24393	10.6609	6.4719	4.22603	4.04458	5.4322	4.92849
-5.54638	-8.4626	-8.63752	-4.58501	-7.07028	-5.0235	-14.2811	-6.0424	-10.6345	-9.41805	-9.1568	-11.9465		5.54638	8.4626	8.63752	4.58501	7.07028	5.0235	14.2811	6.0424	10.6345	9.41805	9.1568	11.9465
-5.11878	-4.86152	-4.77736	-8.0298	-5.70449	-7.2244	-5.33517	-9.96291	-7.70383	-9.05203	-10.1475	-12.434		5.11878	4.86152	4.77736	8.0298	5.70449	7.2244	5.33517	9.96291	7.70383	9.05203	10.1475	12.434
-7.07124	-3.57978	-8.04216	-4.34679	-10.1095	-5.15308	-10.0336	-4.19904	-8.25004	-8.07667	-5.5744	-9.86989		7.07124	3.57978	8.04216	4.34679	10.1095	5.15308	10.0336	4.19904	8.25004	8.07667	5.5744	9.86989
-5.23027	-10.6599	-6.046	-8.71019	-15.32	-6.8016	-20.5613	-8.8656	-11.3626	-17.4202	-4.96727	-5.59569		5.23027	10.6599	6.046	8.71019	15.32	6.8016	20.5613	8.8656	11.3626	17.4202	4.96727	5.59569
-7.48632	-5.1667	-5.41465	-6.92572	-5.59086	-5.4643	-8.59398	-10.9139	-6.60168	-4.72661	-4.12335	-10.34		7.48632	5.1667	5.41465	6.92572	5.59086	5.4643	8.59398	10.9139	6.60168	4.72661	4.12335	10.34
-11.0817	-3.57978	-7.22905	-4.2922	-10.965	-13.7685	-6.35113	-8.77795	-4.89192	-5.03625	-9.12867	-4.04309		11.0817	3.57978	7.22905	4.2922	10.965	13.7685	6.35113	8.77795	4.89192	5.03625	9.12867	4.04309
-4.36553	-5.59394	-8.45652	-9.70169	-5.02977	-5.97322	-6.59035	-4.52538	-13.1921	-7.17438	-10.1078	-10.9394		4.36553	5.59394	8.45652	9.70169	5.02977	5.97322	6.59035	4.52538	13.1921	7.17438	10.1078	10.9394
-3.50897	-6.32636	-4.21173	-5.67501	-5.08569	-7.45203	-5.35883	-4.45484	-7.82071	-5.83593	-5.16717	-5.07602		3.50897	6.32636	4.21173	5.67501	5.08569	7.45203	5.35883	4.45484	7.82071	5.83593	5.16717	5.07602
-5.51976	-13.0402	-5.48259	-6.906	-6.02537	-13.4992	-5.1333	-4.31735	-6.53869	-8.76862	-4.00815	-10.1968		5.51976	13.0402	5.48259	6.906	6.02537	13.4992	5.1333	4.31735	6.53869	8.76862	4.00815	10.1968
-11.6225	-4.49531	-11.9504	-5.23881	-5.76655	-6.85031	-8.10464	-7.07414	-11.2993	-9.98998	-6.38857	-9.09726		11.6225	4.49531	11.9504	5.23881	5.76655	6.85031	8.10464	7.07414	11.2993	9.98998	6.38857	9.09726
-5.86613	-9.56123	-5.054	-4.5867	-6.19868	-11.0668	-5.20332	-4.31417	-6.29286	-14.3867	-7.85784	-6.71229		5.86613	9.56123	5.054	4.5867	6.19868	11.0668	5.20332	4.31417	6.29286	14.3867	7.85784	6.71229
-3.60464	-5.22773	-7.49593	-5.85509	-5.074	-6.50547	-17.48	-5.7577	-7.75721	-4.19536	-4.20416	-10.6714		3.60464	5.22773	7.49593	5.85509	5.074	6.50547	17.48	5.7577	7.75721	4.19536	4.20416	10.6714
-5.18226	-25.3083	-5.33094	-13.619	-13.2901	-8.84603	-9.14766	-4.94431	-6.59316	-4.31903	-5.79261	-5.8442		5.18226	25.3083	5.33094	13.619	13.2901	8.84603	9.14766	4.94431	6.59316	4.31903	5.79261	5.8442
-5.60712	-4.67842	-6.02493	-4.73272	-21.3364	-11.4116	-9.76654	-6.79873	-4.88269	-21.9631	-5.36624	-4.13434		5.60712	4.67842	6.02493	4.73272	21.3364	11.4116	9.76654	6.79873	4.88269	21.9631	5.36624	4.13434
-9.5085	-6.08222	-5.25085	-5.73604	-27.72	-5.44099	-5.27846	-4.05042	-4.51634	-4.44611	-6.10489	-4.19473		9.5085	6.08222	5.25085	5.73604	27.72	5.44099	5.27846	4.05042	4.51634	4.44611	6.10489	4.19473
-4.98549	-3.57978	-7.27163	-4.72736	-18.593	-5.64323	-8.02582	-6.56434	-9.21507	-5.60729	-4.89295	-4.55725		4.98549	3.57978	7.27163	4.72736	18.593	5.64323	8.02582	6.56434	9.21507	5.60729	4.89295	4.55725
-7.71007	-3.57978	-7.65675	-7.17505	-13.9241	-12.1215	-5.03719	-10.0675	-23.007	-6.52301	-7.88756	-6.80974		7.71007	3.57978	7.65675	7.17505	13.9241	12.1215	5.03719	10.0675	23.007	6.52301	7.88756	6.80974
-5.63458	-3.70185	-6.49985	-5.69905	-37.1308	-9.78021	-5.43069	-7.03024	-5.30467	-9.39386	-4.16865	-4.00089		5.63458	3.70185	6.49985	5.69905	37.1308	9.78021	5.43069	7.03024	5.30467	9.39386	4.16865	4.00089
-3.74243	-5.1667	-6.72488	-5.30909	-12.3763	-5.91824	-7.57643	-5.38267	-4.44912	-8.05402	-4.05006	-4.73004		3.74243	5.1667	6.72488	5.30909	12.3763	5.91824	7.57643	5.38267	4.44912	8.05402	4.05006	4.73004
-12.4093	-5.41084	-5.39735	-6.15151	-26.5194	-12.2752	-15.1012	-7.80418	-12.8712	-7.56586	-4.78459	-4.1758		12.4093	5.41084	5.39735	6.15151	26.5194	12.2752	15.1012	7.80418	12.8712	7.56586	4.78459	4.1758
-6.73233	-5.53291	-4.2119	-4.89891	-15.1718	-7.90004	-5.11023	-13.2554	-11.8331	-17.4539	-10.4616	-5.3951		6.73233	5.53291	4.2119	4.89891	15.1718	7.90004	5.11023	13.2554	11.8331	17.4539	10.4616	5.3951
-4.04645	-23.3552	-4.4309	-4.83124	-8.75448	-9.33641	-9.13065	-4.7662	-4.56763	-6.40712	-4.35898	-14.7303		4.04645	23.3552	4.4309	4.83124	8.75448	9.33641	9.13065	4.7662	4.56763	6.40712	4.35898	14.7303
-12.103	-4.92256	-5.20996	-20.6429	-5.44364	-5.31415	-5.64078	-5.75453	-5.48157	-9.3395	-13.6991	-4.3538		12.103	4.92256	5.20996	20.6429	5.44364	5.31415	5.64078	5.75453	5.48157	9.3395	13.6991	4.3538
-3.86312	-8.27949	-11.3149	-4.28707	-8.13478	-6.721	-13.2489	-5.03059	-4.6256	-12.6369	-11.8074	-8.07403		3.86312	8.27949	11.3149	4.28707	8.13478	6.721	13.2489	5.03059	4.6256	12.6369	11.8074	8.07403
-5.26679	-5.83808	-5.79203	-4.42451	-5.20402	-9.34907	-7.37146	-9.85022	-4.07436	-9.22107	-4.30023	-4.07709		5.26679	5.83808	5.79203	4.42451	5.20402	9.34907	7.37146	9.85022	4.07436	9.22107	4.30023	4.07709
-4.83944	-3.82392	-4.32952	-9.69089	-6.98474	-20.7817	-12.577	-4.42952	-4.55596	-5.49829	-20.658	-5.91525		4.83944	3.82392	4.32952	9.69089	6.98474	20.7817	12.577	4.42952	4.55596	5.49829	20.658	5.91525
-3.67462	-18.2893	-5.04534	-5.48686	-7.41044	-5.47236	-9.33025	-6.68713	-13.2178	-17.9504	-9.44192	-4.90427		3.67462	18.2893	5.04534	5.48686	7.41044	5.47236	9.33025	6.68713	13.2178	17.9504	9.44192	4.90427
-6.84705	-4.25117	-5.18769	-6.09033	-12.2059	-5.04843	-6.56895	-4.66023	-4.61174	-6.35724	-9.20152	-16.3086		6.84705	4.25117	5.18769	6.09033	12.2059	5.04843	6.56895	4.66023	4.61174	6.35724	9.20152	16.3086
-4.64968	-4.37324	-4.25025	-7.76271	-11.5168	-9.70359	-10.1054	-4.37645	-4.7936	-6.17473	-8.78193	-4.36668		4.64968	4.37324	4.25025	7.76271	11.5168	9.70359	10.1054	4.37645	4.7936	6.17473	8.78193	4.36668
-5.85601	-7.85224	-6.91964	-4.31446	-17.3717	-5.51066	-7.44517	-12.0682	-4.54884	-11.5473	-11.7257	-8.09484		5.85601	7.85224	6.91964	4.31446	17.3717	5.51066	7.44517	12.0682	4.54884	11.5473	11.7257	8.09484
-9.94452	-4.06806	-4.2978	-5.49839	-5.62499	-5.07371	-15.5886	-7.19801	-19.8063	-4.58946	-5.07482	-4.6535		9.94452	4.06806	4.2978	5.49839	5.62499	5.07371	15.5886	7.19801	19.8063	4.58946	5.07482	4.6535
-3.41306	-4.49531	-10.3565	-7.81862	-23.9649	-5.55335	-12.5544	-4.0913	-7.17172	-6.29848	-4.22346	-17.4077		3.41306	4.49531	10.3565	7.81862	23.9649	5.55335	12.5544	4.0913	7.17172	6.29848	4.22346	17.4077
-8.15788	-3.51875	-4.29355	-5.22918	-11.888	-5.37356	-5.74256	-8.1911	-7.84261	-7.94998	-6.90917	-4.06198		8.15788	3.51875	4.29355	5.22918	11.888	5.37356	5.74256	8.1911	7.84261	7.94998	6.90917	4.06198
-9.00867	-3.70185	-10.703	-6.23818	-6.03885	-14.5531	-16.1456	-5.24165	-4.24052	-9.65913	-6.36383	-11.9369		9.00867	3.70185	10.703	6.23818	6.03885	14.5531	16.1456	5.24165	4.24052	9.65913	6.36383	11.9369
-4.22923	-9.8664	-7.70901	-5.23508	-6.54824	-7.49756	-6.43938	-4.72882	-4.97245	-14.1759	-6.55362	-11.0644		4.22923	9.8664	7.70901	5.23508	6.54824	7.49756	6.43938	4.72882	4.97245	14.1759	6.55362	11.0644
-10.9952	-3.57978	-21.9003	-10.9013	-7.27099	-9.89373	-11.7616	-5.11722	-5.76427	-11.9809	-5.82174	-5.07051		10.9952	3.57978	21.9003	10.9013	7.27099	9.89373	11.7616	5.11722	5.76427	11.9809	5.82174	5.07051
-3.47243	-7.18086	-5.30022	-5.46304	-12.6887	-7.08093	-6.93272	-5.66446	-4.0517	-4.96229	-6.43458	-6.3047		3.47243	7.18086	5.30022	5.46304	12.6887	7.08093	6.93272	5.66446	4.0517	4.96229	6.43458	6.3047
-4.14297	-5.83808	-4.21075	-4.56014	-6.53351	-11.3674	-11.9265	-5.56459	-4.05135	-10.2725	-5.59214	-7.58432		4.14297	5.83808	4.21075	4.56014	6.53351	11.3674	11.9265	5.56459	4.05135	10.2725	5.59214	7.58432
-3.89872	-5.83808	-5.57207	-8.05311	-5.48884	-5.47263	-13.2747	-19.0433	-12.839	-7.58847	-8.8904	-5.01639		3.89872	5.83808	5.57207	8.05311	5.48884	5.47263	13.2747	19.0433	12.839	7.58847	8.8904	5.01639
-3.6544	-4.92256	-5.32866	-6.03353	-5.909	-5.5602	-5.09521	-8.43658	-6.48941	-22.7863	-4.74215	-6.03308		3.6544	4.92256	5.32866	6.03353	5.909	5.5602	5.09521	8.43658	6.48941	22.7863	4.74215	6.03308
-4.63044	-5.3498	-4.66883	-6.03094	-6.48008	-11.4404	-5.31438	-4.01029	-4.65592	-4.17087	-5.84245	-5.61039		4.63044	5.3498	4.66883	6.03094	6.48008	11.4404	5.31438	4.01029	4.65592	4.17087	5.84245	5.61039
-3.77566	-15.4816	-6.59553	-5.35882	-10.7182	-9.17828	-8.11434	-7.50517	-6.79113	-10.706	-7.06595	-4.20381		3.77566	15.4816	6.59553	5.35882	10.7182	9.17828	8.11434	7.50517	6.79113	10.706	7.06595	4.20381
-5.2403	-3.70185	-4.50318	-4.24862	-5.80673	-12.6721	-9.19103	-5.84122	-5.01882	-8.99759	-4.74995	-12.6944		5.2403	3.70185	4.50318	4.24862	5.80673	12.6721	9.19103	5.84122	5.01882	8.99759	4.74995	12.6944
-4.20261	-3.51875	-6.55632	-6.73334	-9.62407	-5.99258	-9.47819	-4.26409	-7.46017	-5.64087	-15.3769	-6.42605		4.20261	3.51875	6.55632	6.73334	9.62407	5.99258	9.47819	4.26409	7.46017	5.64087	15.3769	6.42605
-5.54521	-3.76289	-7.80952	-5.42767	-10.9683	-7.5278	-10.7751	-6.24681	-5.07946	-7.22825	-4.08878	-4.57677		5.54521	3.76289	7.80952	5.42767	10.9683	7.5278	10.7751	6.24681	5.07946	7.22825	4.08878	4.57677
-3.59197	-4.73945	-6.2426	-4.98519	-10.5795	-5.08688	-5.00538	-4.70987	-4.04113	-10.1013	-4.33504	-4.6309		3.59197	4.73945	6.2426	4.98519	10.5795	5.08688	5.00538	4.70987	4.04113	10.1013	4.33504	4.6309
-3.77503	-4.19013	-4.22752	-7.76698	-7.60593	-6.73996	-10.524	-6.06753	-10.021	-10.6514	-4.33754	-4.32547		3.77503	4.19013	4.22752	7.76698	7.60593	6.73996	10.524	6.06753	10.021	10.6514	4.33754	4.32547
-6.09426	-5.41084	-7.08308	-7.72154	-26.6132	-5.25419	-8.53632	-11.7345	-4.77055	-4.55317	-4.7086	-9.08246		6.09426	5.41084	7.08308	7.72154	26.6132	5.25419	8.53632	11.7345	4.77055	4.55317	4.7086	9.08246
-7.98612	-3.76289	-14.045	-6.02634	-6.5646	-23.9043	-30.6132	-7.15385	-8.06577	-6.26413	-6.4918	-5.78109		7.98612	3.76289	14.045	6.02634	6.5646	23.9043	30.6132	7.15385	8.06577	6.26413	6.4918	5.78109
-32.5217	-3.45771	-7.00511	-4.76418	-25.1896	-5.72481	-9.63038	-6.56768	-4.52479	-7.48503	-4.17253	-4.55736		32.5217	3.45771	7.00511	4.76418	25.1896	5.72481	9.63038	6.56768	4.52479	7.48503	4.17253	4.55736
-4.56725	-4.3122	-5.91284	-5.72578	-13.8306	-5.67968	-8.81082	-6.55289	-11.1163	-10.3559	-4.66523	-4.06802		4.56725	4.3122	5.91284	5.72578	13.8306	5.67968	8.81082	6.55289	11.1163	10.3559	4.66523	4.06802
-12.4404	-3.45771	-5.33725	-6.81283	-5.578	-6.30295	-6.12955	-4.40462	-5.74394	-8.34485	-5.52241	-4.31066		12.4404	3.45771	5.33725	6.81283	5.578	6.30295	6.12955	4.40462	5.74394	8.34485	5.52241	4.31066
-5.35995	-12.1857	-4.90759	-4.57744	-5.02938	-15.9325	-5.19513	-5.38929	-4.52319	-4.56187	-11.0793	-32.6308		5.35995	12.1857	4.90759	4.57744	5.02938	15.9325	5.19513	5.38929	4.52319	4.56187	11.0793	32.6308
-5.84807	-3.57978	-8.13757	-5.59836	-8.80483	-5.99127	-7.64952	-7.16677	-4.15693	-4.02088	-13.4051	-4.06533		5.84807	3.57978	8.13757	5.59836	8.80483	5.99127	7.64952	7.16677	4.15693	4.02088	13.4051	4.06533
-25.6836	-4.61738	-4.59383	-4.90155	-7.33263	-5.0153	-5.18217	-5.14399	-6.17001	-5.3031	-16.3965	-5.0984		25.6836	4.61738	4.59383	4.90155	7.33263	5.0153	5.18217	5.14399	6.17001	5.3031	16.3965	5.0984
-4.56428	-13.9558	-9.18951	-6.18681	-6.1884	-8.4402	-5.03089	-5.38563	-6.47512	-6.09711	-8.64561	-10.3468		4.56428	13.9558	9.18951	6.18681	6.1884	8.4402	5.03089	5.38563	6.47512	6.09711	8.64561	10.3468
-4.56382	-3.88496	-4.2116	-5.24119	-6.29383	-12.9626	-13.8511	-4.42174	-4.64048	-4.08392	-13.4156	-5.45794		4.56382	3.88496	4.2116	5.24119	6.29383	12.9626	13.8511	4.42174	4.64048	4.08392	13.4156	5.45794
-10.7858	-29.8859	-8.67598	-4.53762	-7.19463	-10.5638	-7.89013	-6.42306	-4.57943	-6.22035	-5.72916	-32.9841		10.7858	29.8859	8.67598	4.53762	7.19463	10.5638	7.89013	6.42306	4.57943	6.22035	5.72916	32.9841
-4.18534	-6.93672	-5.67983	-5.47229	-5.90828	-5.35691	-5.28203	-8.16506	-7.44763	-11.8987	-4.81985	-4.96435		4.18534	6.93672	5.67983	5.47229	5.90828	5.35691	5.28203	8.16506	7.44763	11.8987	4.81985	4.96435
-3.99887	-5.41084	-6.65999	-22.0349	-5.63297	-5.30204	-5.62612	-7.56185	-4.51672	-4.7591	-6.53346	-6.91406		3.99887	5.41084	6.65999	22.0349	5.63297	5.30204	5.62612	7.56185	4.51672	4.7591	6.53346	6.91406
-3.47922	-3.64082	-8.09066	-9.81567	-14.0601	-5.10386	-5.47572	-9.64896	-9.76548	-4.75939	-10.44	-11.8569		3.47922	3.64082	8.09066	9.81567	14.0601	5.10386	5.47572	9.64896	9.76548	4.75939	10.44	11.8569
-3.6604	-4.67842	-5.18382	-9.68245	-10.8187	-10.1714	-11.013	-5.68107	-20.9326	-9.1542	-6.16799	-4.63361		3.6604	4.67842	5.18382	9.68245	10.8187	10.1714	11.013	5.68107	20.9326	9.1542	6.16799	4.63361
-4.87508	-3.82392	-4.39405	-12.4986	-8.08698	-8.58651	-10.5379	-4.22962	-4.39208	-8.73053	-4.76423	-5.48261		4.87508	3.82392	4.39405	12.4986	8.08698	8.58651	10.5379	4.22962	4.39208	8.73053	4.76423	5.48261
-14.0704	-8.58467	-10.6797	-8.25438	-6.80217	-5.17888	-5.90428	-4.42898	-4.26907	-6.41144	-12.6409	-4.37658		14.0704	8.58467	10.6797	8.25438	6.80217	5.17888	5.90428	4.42898	4.26907	6.41144	12.6409	4.37658
-5.70223	-9.62226	-4.86825	-5.35189	-6.99418	-17.173	-5.41538	-10.7	-6.03776	-5.98433	-5.86966	-13.5242		5.70223	9.62226	4.86825	5.35189	6.99418	17.173	5.41538	10.7	6.03776	5.98433	5.86966	13.5242
-4.4616	-4.00703	-4.43082	-12.8438	-8.50515	-9.43523	-10.0885	-11.6672	-7.8683	-4.03864	-4.4659	-10.2831		4.4616	4.00703	4.43082	12.8438	8.50515	9.43523	10.0885	11.6672	7.8683	4.03864	4.4659	10.2831
-5.37698	-3.70185	-5.97935	-10.6202	-5.21612	-9.44313	-7.60657	-6.86979	-12.9942	-8.43576	-4.41336	-4.54361		5.37698	3.70185	5.97935	10.6202	5.21612	9.44313	7.60657	6.86979	12.9942	8.43576	4.41336	4.54361
-4.15618	-4.49531	-5.20415	-14.4355	-6.93152	-5.86402	-14.0255	-9.9137	-4.6931	-5.08141	-6.73577	-4.84557		4.15618	4.49531	5.20415	14.4355	6.93152	5.86402	14.0255	9.9137	4.6931	5.08141	6.73577	4.84557
-5.49886	-4.43428	-6.2046	-5.28111	-10.1694	-5.99104	-7.36752	-14.2634	-4.38743	-5.32566	-4.41664	-4.05203		5.49886	4.43428	6.2046	5.28111	10.1694	5.99104	7.36752	14.2634	4.38743	5.32566	4.41664	4.05203
-4.9495	-5.3498	-18.5045	-11.2053	-8.35707	-6.79096	-7.83647	-4.01905	-7.55938	-5.08295	-13.7566	-10.3957		4.9495	5.3498	18.5045	11.2053	8.35707	6.79096	7.83647	4.01905	7.55938	5.08295	13.7566	10.3957
-5.68178	-3.45771	-4.90535	-5.78321	-6.42698	-5.30399	-8.13879	-11.8095	-4.20305	-5.77242	-4.43308	-5.25908		5.68178	3.45771	4.90535	5.78321	6.42698	5.30399	8.13879	11.8095	4.20305	5.77242	4.43308	5.25908
-5.25071	-5.22773	-4.44868	-12.3087	-5.71361	-12.1326	-5.38337	-9.73891	-5.85141	-5.04157	-6.81843	-10.441		5.25071	5.22773	4.44868	12.3087	5.71361	12.1326	5.38337	9.73891	5.85141	5.04157	6.81843	10.441
-13.5509	-5.10566	-4.4391	-4.87854	-10.956	-16.0515	-6.3448	-11.0534	-4.26585	-4.62193	-50.164	-5.67657		13.5509	5.10566	4.4391	4.87854	10.956	16.0515	6.3448	11.0534	4.26585	4.62193	50.164	5.67657
-4.49511	-4.86152	-8.00712	-6.26636	-7.61432	-11.2514	-12.1719	-6.69959	-10.0665	-4.26283	-5.54822	-15.3721		4.49511	4.86152	8.00712	6.26636	7.61432	11.2514	12.1719	6.69959	10.0665	4.26283	5.54822	15.3721
-4.61125	-18.5334	-4.70868	-4.81414	-7.19274	-7.52933	-7.64484	-12.1903	-8.54139	-8.47466	-8.36642	-5.46564		4.61125	18.5334	4.70868	4.81414	7.19274	7.52933	7.64484	12.1903	8.54139	8.47466	8.36642	5.46564
-7.65802	-4.3122	-12.322	-5.65894	-12.2241	-6.32952	-7.22258	-5.45381	-12.2045	-10.7989	-4.82654	-25.8435		7.65802	4.3122	12.322	5.65894	12.2241	6.32952	7.22258	5.45381	12.2045	10.7989	4.82654	25.8435
-3.994	-5.89912	-4.57541	-6.734	-9.59837	-5.07506	-7.13027	-6.93009	-6.4101	-7.44372	-10.4517	-4.40551		3.994	5.89912	4.57541	6.734	9.59837	5.07506	7.13027	6.93009	6.4101	7.44372	10.4517	4.40551
-3.44421	-4.49531	-5.14033	-12.6682	-6.99679	-12.4038	-16.0537	-4.96997	-4.58251	-9.15656	-7.46429	-4.70988		3.44421	4.49531	5.14033	12.6682	6.99679	12.4038	16.0537	4.96997	4.58251	9.15656	7.46429	4.70988
-3.86909	-5.53291	-4.63262	-17.4495	-22.5343	-6.68693	-9.6739	-9.00641	-7.51381	-5.44246	-10.949	-4.8775		3.86909	5.53291	4.63262	17.4495	22.5343	6.68693	9.6739	9.00641	7.51381	5.44246	10.949	4.8775
-3.62477	-5.77705	-5.54256	-6.34203	-10.6453	-5.35207	-5.40524	-6.08529	-4.83428	-5.32747	-7.71696	-5.07809		3.62477	5.77705	5.54256	6.34203	10.6453	5.35207	5.40524	6.08529	4.83428	5.32747	7.71696	5.07809
-5.26954	-4.3122	-9.88053	-4.71018	-5.36832	-5.47205	-12.7481	-4.07236	-7.64426	-4.41436	-13.3982	-9.83817		5.26954	4.3122	9.88053	4.71018	5.36832	5.47205	12.7481	4.07236	7.64426	4.41436	13.3982	9.83817
-8.74182	-8.09639	-6.91114	-13.4825	-15.6234	-5.31765	-6.77659	-5.27906	-5.26642	-5.52017	-8.4549	-6.05103		8.74182	8.09639	6.91114	13.4825	15.6234	5.31765	6.77659	5.27906	5.26642	5.52017	8.4549	6.05103
-4.1009	-4.49531	-5.43785	-4.78007	-5.95298	-18.0317	-18.2039	-4.69158	-5.39299	-9.31241	-25.24	-15.0166		4.1009	4.49531	5.43785	4.78007	5.95298	18.0317	18.2039	4.69158	5.39299	9.31241	25.24	15.0166
-3.67359	-3.45771	-7.50443	-4.32272	-5.07599	-13.0097	-8.28942	-6.0607	-6.91902	-7.66586	-5.65711	-12.9976		3.67359	3.45771	7.50443	4.32272	5.07599	13.0097	8.28942	6.0607	6.91902	7.66586	5.65711	12.9976
-27.8404	-3.57978	-6.38421	-6.51562	-6.92187	-6.75141	-6.6865	-4.10001	-6.92029	-5.83502	-8.10241	-8.35865		27.8404	3.57978	6.38421	6.51562	6.92187	6.75141	6.6865	4.10001	6.92029	5.83502	8.10241	8.35865
-3.7302	-5.04463	-4.37557	-18.424	-7.25773	-6.73178	-12.7102	-12.3554	-5.03225	-8.52206	-5.35907	-10.1777		3.7302	5.04463	4.37557	18.424	7.25773	6.73178	12.7102	12.3554	5.03225	8.52206	5.35907	10.1777
-6.29279	-4.3122	-8.87722	-6.28848	-17.8028	-18.7482	-9.90475	-14.2158	-11.8689	-12.49	-4.32225	-6.26752		6.29279	4.3122	8.87722	6.28848	17.8028	18.7482	9.90475	14.2158	11.8689	12.49	4.32225	6.26752
-3.85131	-5.1667	-10.5631	-6.55081	-8.30818	-6.05317	-12.1249	-4.88763	-4.9118	-9.07382	-5.24199	-6.81296		3.85131	5.1667	10.5631	6.55081	8.30818	6.05317	12.1249	4.88763	4.9118	9.07382	5.24199	6.81296
-3.48435	-9.80537	-39.1467	-13.3499	-12.7596	-6.71568	-8.15285	-5.62333	-8.21041	-13.901	-5.30725	-9.98106		3.48435	9.80537	39.1467	13.3499	12.7596	6.71568	8.15285	5.62333	8.21041	13.901	5.30725	9.98106
-3.66742	-8.27949	-4.28869	-6.76972	-11.8726	-7.94039	-9.12292	-5.38248	-4.42666	-5.78533	-17.5149	-5.1467		3.66742	8.27949	4.28869	6.76972	11.8726	7.94039	9.12292	5.38248	4.42666	5.78533	17.5149	5.1467
-3.66126	-5.71601	-5.97571	-8.05188	-18.5491	-14.371	-28.5433	-6.98681	-6.44225	-6.89146	-7.14298	-8.92925		3.66126	5.71601	5.97571	8.05188	18.5491	14.371	28.5433	6.98681	6.44225	6.89146	7.14298	8.92925
-3.83605	-3.88496	-10.4674	-7.67828	-6.23228	-6.59991	-5.3226	-5.30609	-4.85641	-4.75811	-11.9673	-7.63988		3.83605	3.88496	10.4674	7.67828	6.23228	6.59991	5.3226	5.30609	4.85641	4.75811	11.9673	7.63988
-12.9867	-3.45771	-9.78951	-8.45751	-5.71767	-8.07386	-6.28279	-4.67035	-26.3412	-4.39287	-5.74347	-6.58534		12.9867	3.45771	9.78951	8.45751	5.71767	8.07386	6.28279	4.67035	26.3412	4.39287	5.74347	6.58534
-7.18821	-5.3498	-5.57333	-6.78476	-6.08349	-5.41836	-6.841	-11.5828	-4.73608	-4.8223	-6.04926	-9.08568		7.18821	5.3498	5.57333	6.78476	6.08349	5.41836	6.841	11.5828	4.73608	4.8223	6.04926	9.08568
-8.46416	-3.88496	-4.7243	-6.55751	-6.45584	-8.67758	-10.912	-7.9748	-5.71734	-7.87552	-4.95224	-14.5694		8.46416	3.88496	4.7243	6.55751	6.45584	8.67758	10.912	7.9748	5.71734	7.87552	4.95224	14.5694
-3.52024	-4.37324	-5.54153	-6.46392	-6.55655	-39.4935	-8.84153	-10.1715	-12.9218	-7.26822	-4.66563	-8.03811		3.52024	4.37324	5.54153	6.46392	6.55655	39.4935	8.84153	10.1715	12.9218	7.26822	4.66563	8.03811
-4.79984	-9.92744	-5.01859	-23.4099	-5.2018	-9.28003	-5.23226	-6.85156	-6.63581	-5.92559	-15.7766	-13.3996		4.79984	9.92744	5.01859	23.4099	5.2018	9.28003	5.23226	6.85156	6.63581	5.92559	15.7766	13.3996
-4.66934	-3.51875	-5.05429	-5.78089	-5.73881	-7.12247	-5.68885	-8.88378	-8.84271	-4.10106	-7.11189	-14.4916		4.66934	3.51875	5.05429	5.78089	5.73881	7.12247	5.68885	8.88378	8.84271	4.10106	7.11189	14.4916
-3.50553	-12.552	-8.71146	-6.90328	-9.36342	-5.84459	-8.84925	-5.0921	-4.02123	-8.61826	-5.40965	-8.19462		3.50553	12.552	8.71146	6.90328	9.36342	5.84459	8.84925	5.0921	4.02123	8.61826	5.40965	8.19462
-7.34166	-3.57978	-8.96389	-4.28569	-16.7616	-5.11145	-12.4637	-5.05547	-4.44852	-17.5296	-17.0106	-7.57526		7.34166	3.57978	8.96389	4.28569	16.7616	5.11145	12.4637	5.05547	4.44852	17.5296	17.0106	7.57526
-3.79892	-8.15742	-4.3633	-15.3037	-5.85925	-18.7447	-20.8209	-4.74909	-9.1487	-14.3637	-16.3395	-12.6935		3.79892	8.15742	4.3633	15.3037	5.85925	18.7447	20.8209	4.74909	9.1487	14.3637	16.3395	12.6935
-7.1345	-14.5661	-4.45924	-5.00301	-9.5735	-7.38045	-5.65635	-4.39647	-6.70844	-9.17896	-7.73957	-6.77209		7.1345	14.5661	4.45924	5.00301	9.5735	7.38045	5.65635	4.39647	6.70844	9.17896	7.73957	6.77209
-14.1977	-17.5568	-6.17088	-4.76922	-7.15343	-7.87406	-8.27174	-9.94873	-6.5254	-10.0371	-27.3972	-5.67044		14.1977	17.5568	6.17088	4.76922	7.15343	7.87406	8.27174	9.94873	6.5254	10.0371	27.3972	5.67044
-3.6384	-5.41084	-5.88634	-5.61303	-5.86509	-5.39581	-41.2383	-13.9838	-7.44146	-6.32042	-6.77359	-5.30398		3.6384	5.41084	5.88634	5.61303	5.86509	5.39581	41.2383	13.9838	7.44146	6.32042	6.77359	5.30398
-7.84865	-5.65498	-4.66502	-12.5764	-5.11451	-5.37344	-10.2158	-4.73427	-12.6929	-5.59328	-8.44375	-4.49237		7.84865	5.65498	4.66502	12.5764	5.11451	5.37344	10.2158	4.73427	12.6929	5.59328	8.44375	4.49237
-5.71184	-5.96015	-8.43891	-5.44801	-5.22017	-7.90014	-7.58826	-13.3592	-5.61329	-5.3499	-5.27058	-6.01727		5.71184	5.96015	8.43891	5.44801	5.22017	7.90014	7.58826	13.3592	5.61329	5.3499	5.27058	6.01727
-4.24488	-7.85224	-7.84037	-7.58577	-5.32305	-5.19918	-5.21822	-5.11223	-6.71223	-13.4687	-6.67485	-9.66714		4.24488	7.85224	7.84037	7.58577	5.32305	5.19918	5.21822	5.11223	6.71223	13.4687	6.67485	9.66714
-4.67161	-9.19502	-5.76454	-7.46127	-6.45503	-15.9085	-45.1466	-6.93565	-5.30938	-5.90064	-28.3464	-4.29169		4.67161	9.19502	5.76454	7.46127	6.45503	15.9085	45.1466	6.93565	5.30938	5.90064	28.3464	4.29169
-18.4043	-6.3874	-5.2001	-12.9563	-7.18404	-10.6923	-29.0185	-6.5269	-4.64272	-11.7657	-5.27617	-4.09369		18.4043	6.3874	5.2001	12.9563	7.18404	10.6923	29.0185	6.5269	4.64272	11.7657	5.27617	4.09369
-3.45043	-8.76777	-4.66125	-7.08405	-11.572	-5.07687	-6.11707	-11.649	-4.15454	-4.25858	-5.46169	-6.10619		3.45043	8.76777	4.66125	7.08405	11.572	5.07687	6.11707	11.649	4.15454	4.25858	5.46169	6.10619
-3.51136	-15.0544	-4.89836	-5.82047	-6.70846	-7.02922	-5.69641	-4.22135	-11.4198	-18.2374	-4.42865	-9.76648		3.51136	15.0544	4.89836	5.82047	6.70846	7.02922	5.69641	4.22135	11.4198	18.2374	4.42865	9.76648
-8.14535	-3.70185	-7.74994	-5.60513	-11.1561	-9.82992	-12.6481	-4.63906	-4.09693	-5.90922	-4.30929	-14.4405		8.14535	3.70185	7.74994	5.60513	11.1561	9.82992	12.6481	4.63906	4.09693	5.90922	4.30929	14.4405
-4.5957	-5.89912	-5.44215	-5.5998	-9.6487	-6.16392	-8.7294	-4.60006	-4.40301	-8.41468	-4.12622	-5.16265		4.5957	5.89912	5.44215	5.5998	9.6487	6.16392	8.7294	4.60006	4.40301	8.41468	4.12622	5.16265
-3.61794	-8.4626	-5.43606	-5.34799	-10.355	-5.59521	-20.8104	-4.12736	-4.34207	-4.33293	-4.62332	-4.42175		3.61794	8.4626	5.43606	5.34799	10.355	5.59521	20.8104	4.12736	4.34207	4.33293	4.62332	4.42175
-5.81484	-5.22773	-5.77008	-5.43316	-15.0591	-5.16427	-11.5416	-4.27475	-6.30179	-12.4562	-4.6279	-6.43312		5.81484	5.22773	5.77008	5.43316	15.0591	5.16427	11.5416	4.27475	6.30179	12.4562	4.6279	6.43312
-5.14164	-7.79121	-5.17134	-8.0917	-5.20933	-5.10296	-5.06497	-9.39418	-10.087	-4.64405	-5.49751	-7.40835		5.14164	7.79121	5.17134	8.0917	5.20933	5.10296	5.06497	9.39418	10.087	4.64405	5.49751	7.40835
-6.23958	-4.37324	-5.33787	-4.45047	-7.25074	-5.40571	-26.2404	-4.6445	-16.8015	-8.18746	-4.71533	-8.44035		6.23958	4.37324	5.33787	4.45047	7.25074	5.40571	26.2404	4.6445	16.8015	8.18746	4.71533	8.44035
-4.16341	-3.45771	-4.94412	-4.69629	-5.90559	-5.15088	-15.7116	-7.71332	-8.07544	-5.44377	-4.41764	-11.5958		4.16341	3.45771	4.94412	4.69629	5.90559	5.15088	15.7116	7.71332	8.07544	5.44377	4.41764	11.5958
-6.54331	-4.3122	-5.64092	-4.94427	-6.44829	-5.81216	-9.6114	-38.055	-6.85588	-14.6	-8.38533	-12.5024		6.54331	4.3122	5.64092	4.94427	6.44829	5.81216	9.6114	38.055	6.85588	14.6	8.38533	12.5024
-5.99347	-4.61738	-7.04706	-4.3893	-8.38541	-7.09045	-13.8679	-5.62037	-12.5364	-15.151	-6.00982	-6.03022		5.99347	4.61738	7.04706	4.3893	8.38541	7.09045	13.8679	5.62037	12.5364	15.151	6.00982	6.03022
-17.9554	-4.3122	-4.49308	-4.71987	-11.3927	-5.84521	-9.89551	-9.46282	-4.90787	-8.74749	-5.89263	-10.2858		17.9554	4.3122	4.49308	4.71987	11.3927	5.84521	9.89551	9.46282	4.90787	8.74749	5.89263	10.2858
-4.09949	-3.82392	-4.33624	-13.6243	-8.64091	-6.45509	-18.4435	-4.17413	-20.0467	-5.81814	-5.16459	-7.47673		4.09949	3.82392	4.33624	13.6243	8.64091	6.45509	18.4435	4.17413	20.0467	5.81814	5.16459	7.47673
-9.77325	-6.26533	-4.54277	-5.37458	-5.71596	-43.4322	-9.03958	-6.95304	-4.42239	-6.24901	-6.32599	-4.90789		9.77325	6.26533	4.54277	5.37458	5.71596	43.4322	9.03958	6.95304	4.42239	6.24901	6.32599	4.90789
-10.8072	-14.1389	-4.40963	-11.2232	-7.78491	-5.01458	-12.8797	-19.4359	-5.76578	-4.96751	-4.12907	-11.5604		10.8072	14.1389	4.40963	11.2232	7.78491	5.01458	12.8797	19.4359	5.76578	4.96751	4.12907	11.5604
-5.79911	-3.64082	-4.70188	-4.36258	-23.5228	-5.1948	-5.96831	-12.5276	-4.17889	-9.6679	-4.67845	-4.94565		5.79911	3.64082	4.70188	4.36258	23.5228	5.1948	5.96831	12.5276	4.17889	9.6679	4.67845	4.94565
-10.0663	-15.7258	-9.22761	-6.34436	-7.95206	-7.57145	-5.7139	-4.72206	-4.17901	-26.3311	-5.65766	-11.2875		10.0663	15.7258	9.22761	6.34436	7.95206	7.57145	5.7139	4.72206	4.17901	26.3311	5.65766	11.2875
-10.3075	-25.7355	-5.18455	-7.39367	-6.67993	-24.1678	-7.90682	-5.54012	-5.46083	-4.29879	-6.52798	-4.1413		10.3075	25.7355	5.18455	7.39367	6.67993	24.1678	7.90682	5.54012	5.46083	4.29879	6.52798	4.1413
-6.08363	-11.5144	-9.26782	-6.72729	-5.13402	-6.76235	-5.55434	-5.0456	-13.1513	-7.84127	-7.19958	-8.39631		6.08363	11.5144	9.26782	6.72729	5.13402	6.76235	5.55434	5.0456	13.1513	7.84127	7.19958	8.39631
-12.5519	-5.65498	-7.48514	-4.32015	-9.62616	-7.39175	-9.00043	-4.13808	-4.11819	-10.1607	-10.4418	-14.3772		12.5519	5.65498	7.48514	4.32015	9.62616	7.39175	9.00043	4.13808	4.11819	10.1607	10.4418	14.3772
-10.5942	-4.25117	-7.42952	-6.80694	-6.70637	-12.1294	-8.03991	-10.2652	-5.34064	-8.208	-6.72214	-4.35817		10.5942	4.25117	7.42952	6.80694	6.70637	12.1294	8.03991	10.2652	5.34064	8.208	6.72214	4.35817
-8.56311	-4.73945	-5.65548	-4.71334	-7.35045	-10.5055	-8.20131	-5.03218	-4.48686	-8.08694	-6.91134	-5.08904		8.56311	4.73945	5.65548	4.71334	7.35045	10.5055	8.20131	5.03218	4.48686	8.08694	6.91134	5.08904
-7.5765	-3.82392	-8.14689	-10.715	-9.48206	-11.0731	-6.32107	-8.1077	-7.29462	-6.25793	-13.5669	-4.47755		7.5765	3.82392	8.14689	10.715	9.48206	11.0731	6.32107	8.1077	7.29462	6.25793	13.5669	4.47755
-34.1844	-4.37324	-8.53096	-10.293	-5.32444	-8.46792	-6.13375	-5.71839	-10.0419	-4.18958	-15.9483	-14.1064		34.1844	4.37324	8.53096	10.293	5.32444	8.46792	6.13375	5.71839	10.0419	4.18958	15.9483	14.1064
-5.54255	-4.19013	-4.83211	-9.86112	-8.98487	-11.0009	-19.8551	-8.23439	-6.56419	-4.13584	-5.02412	-6.58418		5.54255	4.19013	4.83211	9.86112	8.98487	11.0009	19.8551	8.23439	6.56419	4.13584	5.02412	6.58418
-6.80793	-5.89912	-6.77455	-5.57991	-11.6921	-17.595	-23.6426	-6.24261	-4.36912	-7.24872	-6.01448	-5.66596		6.80793	5.89912	6.77455	5.57991	11.6921	17.595	23.6426	6.24261	4.36912	7.24872	6.01448	5.66596
-4.65958	-3.88496	-12.6238	-7.73472	-7.63993	-47.7009	-5.87684	-5.8264	-19.9352	-9.50805	-10.4738	-7.61715		4.65958	3.88496	12.6238	7.73472	7.63993	47.7009	5.87684	5.8264	19.9352	9.50805	10.4738	7.61715
-6.45654	-6.32636	-16.8856	-4.56622	-6.09993	-8.83122	-21.3697	-6.59505	-4.18813	-10.4851	-14.3261	-7.79692		6.45654	6.32636	16.8856	4.56622	6.09993	8.83122	21.3697	6.59505	4.18813	10.4851	14.3261	7.79692
-3.89137	-7.73017	-4.26113	-9.41531	-6.68677	-5.29877	-8.06238	-4.02375	-4.73763	-12.9882	-4.38	-15.7867		3.89137	7.73017	4.26113	9.41531	6.68677	5.29877	8.06238	4.02375	4.73763	12.9882	4.38	15.7867
-5.13488	-3.51875	-5.32525	-7.11573	-10.377	-14.5126	-6.94651	-12.1329	-5.40909	-8.65638	-8.78393	-22.9752		5.13488	3.51875	5.32525	7.11573	10.377	14.5126	6.94651	12.1329	5.40909	8.65638	8.78393	22.9752
-6.41211	-6.02119	-4.91862	-5.92038	-12.8158	-5.02498	-16.1894	-4.63002	-4.00535	-4.01785	-29.171	-8.84578		6.41211	6.02119	4.91862	5.92038	12.8158	5.02498	16.1894	4.63002	4.00535	4.01785	29.171	8.84578
-4.30275	-4.80049	-6.65025	-12.3111	-8.66397	-10.2284	-29.0655	-5.06406	-10.9648	-4.4476	-4.75857	-5.17627		4.30275	4.80049	6.65025	12.3111	8.66397	10.2284	29.0655	5.06406	10.9648	4.4476	4.75857	5.17627
-4.16582	-6.75361	-11.1594	-8.10492	-5.12149	-5.28939	-6.44999	-5.06981	-4.61972	-9.14736	-4.64062	-4.18602		4.16582	6.75361	11.1594	8.10492	5.12149	5.28939	6.44999	5.06981	4.61972	9.14736	4.64062	4.18602
-7.94345	-25.3083	-5.08868	-4.75598	-5.02046	-5.50111	-7.55071	-4.74124	-9.86879	-4.08155	-12.1543	-4.78477		7.94345	25.3083	5.08868	4.75598	5.02046	5.50111	7.55071	4.74124	9.86879	4.08155	12.1543	4.78477
-6.84365	-3.45771	-4.4874	-4.87848	-9.5068	-9.14918	-28.9624	-8.80691	-8.83164	-4.99715	-7.45828	-4.05126		6.84365	3.45771	4.4874	4.87848	9.5068	9.14918	28.9624	8.80691	8.83164	4.99715	7.45828	4.05126
-5.73655	-7.97431	-13.0718	-4.95	-5.74923	-5.54631	-7.42377	-10.0461	-5.59743	-4.69208	-10.8236	-6.67543		5.73655	7.97431	13.0718	4.95	5.74923	5.54631	7.42377	10.0461	5.59743	4.69208	10.8236	6.67543
-3.52494	-6.32636	-5.69139	-4.22166	-5.20229	-11.2128	-15.1218	-5.31022	-10.42	-10.6736	-10.5805	-4.16104		3.52494	6.32636	5.69139	4.22166	5.20229	11.2128	15.1218	5.31022	10.42	10.6736	10.5805	4.16104
-9.67478	-3.51875	-6.55442	-6.11874	-6.25587	-36.3323	-7.83353	-5.56265	-11.2757	-5.97434	-4.47723	-8.72828		9.67478	3.51875	6.55442	6.11874	6.25587	36.3323	7.83353	5.56265	11.2757	5.97434	4.47723	8.72828
-4.35716	-8.6457	-4.76886	-7.97586	-5.50073	-7.64182	-7.73837	-6.70732	-10.8485	-4.02134	-4.29691	-10.7984		4.35716	8.6457	4.76886	7.97586	5.50073	7.64182	7.73837	6.70732	10.8485	4.02134	4.29691	10.7984
-10.2682	-8.70674	-4.26225	-12.563	-5.64837	-12.7756	-5.79307	-7.61979	-4.31997	-4.93689	-4.78565	-6.79951		10.2682	8.70674	4.26225	12.563	5.64837	12.7756	5.79307	7.61979	4.31997	4.93689	4.78565	6.79951
-6.16597	-4.98359	-5.4139	-5.97871	-19.4083	-5.14469	-9.67628	-6.57413	-12.9262	-4.75388	-8.26577	-5.36077		6.16597	4.98359	5.4139	5.97871	19.4083	5.14469	9.67628	6.57413	12.9262	4.75388	8.26577	5.36077
-4.45425	-4.61738	-19.4296	-5.82064	-5.00586	-5.61471	-24.0518	-4.18476	-4.38195	-5.30392	-4.23861	-5.8761		4.45425	4.61738	19.4296	5.82064	5.00586	5.61471	24.0518	4.18476	4.38195	5.30392	4.23861	5.8761
-3.47764	-3.45771	-4.25468	-4.44187	-5.32089	-6.95525	-6.37469	-5.62667	-4.87094	-7.5014	-4.36663	-5.93682		3.47764	3.45771	4.25468	4.44187	5.32089	6.95525	6.37469	5.62667	4.87094	7.5014	4.36663	5.93682
-5.54343	-6.87568	-4.34391	-6.18759	-12.7881	-6.64374	-14.2148	-5.07864	-5.48302	-4.08346	-4.67494	-5.80823		5.54343	6.87568	4.34391	6.18759	12.7881	6.64374	14.2148	5.07864	5.48302	4.08346	4.67494	5.80823
-4.2006	-5.10566	-4.27086	-5.82844	-16.8971	-13.41	-8.07161	-8.61337	-10.7321	-6.83311	-8.88835	-5.62311		4.2006	5.10566	4.27086	5.82844	16.8971	13.41	8.07161	8.61337	10.7321	6.83311	8.88835	5.62311
-5.78367	-4.1291	-5.59835	-11.3251	-9.13703	-5.17798	-8.34149	-15.7553	-15.1277	-6.28408	-4.20676	-8.21438		5.78367	4.1291	5.59835	11.3251	9.13703	5.17798	8.34149	15.7553	15.1277	6.28408	4.20676	8.21438
-5.43257	-15.1154	-8.09984	-9.49078	-5.05628	-11.8897	-5.78746	-4.04033	-4.32516	-4.45758	-4.33663	-6.97866		5.43257	15.1154	8.09984	9.49078	5.05628	11.8897	5.78746	4.04033	4.32516	4.45758	4.33663	6.97866
-3.41654	-9.01191	-6.60089	-4.84497	-5.92806	-6.88356	-6.70083	-5.0577	-11.5294	-5.13472	-19.7212	-11.7783		3.41654	9.01191	6.60089	4.84497	5.92806	6.88356	6.70083	5.0577	11.5294	5.13472	19.7212	11.7783
-5.30166	-10.4768	-12.8239	-5.16671	-11.317	-6.37559	-14.1917	-5.41548	-11.044	-5.19597	-8.18573	-6.6048		5.30166	10.4768	12.8239	5.16671	11.317	6.37559	14.1917	5.41548	11.044	5.19597	8.18573	6.6048
-3.71342	-3.70185	-8.62365	-10.083	-10.0455	-5.46831	-10.5751	-6.05565	-16.2332	-4.71404	-23.0785	-4.82148		3.71342	3.70185	8.62365	10.083	10.0455	5.46831	10.5751	6.05565	16.2332	4.71404	23.0785	4.82148
-4.60282	-15.0544	-7.27823	-5.60907	-8.05976	-5.70275	-5.65021	-5.56583	-4.51513	-7.03366	-4.71113	-4.32661		4.60282	15.0544	7.27823	5.60907	8.05976	5.70275	5.65021	5.56583	4.51513	7.03366	4.71113	4.32661
-10.6294	-6.50947	-5.55725	-8.51255	-11.7374	-11.8874	-5.57797	-7.51349	-6.4134	-4.0478	-9.1722	-5.5426		10.6294	6.50947	5.55725	8.51255	11.7374	11.8874	5.57797	7.51349	6.4134	4.0478	9.1722	5.5426
-5.68281	-3.64082	-5.05658	-19.5183	-6.77298	-7.6613	-14.5032	-5.86921	-5.25681	-4.29459	-8.92931	-5.17127		5.68281	3.64082	5.05658	19.5183	6.77298	7.6613	14.5032	5.86921	5.25681	4.29459	8.92931	5.17127
-4.07133	-6.26533	-6.33499	-4.74986	-10.8208	-28.084	-12.4592	-6.91321	-5.07376	-9.11754	-16.742	-14.1534		4.07133	6.26533	6.33499	4.74986	10.8208	28.084	12.4592	6.91321	5.07376	9.11754	16.742	14.1534
-3.57275	-13.4675	-6.12599	-5.88911	-7.14185	-20.7391	-7.41185	-4.09828	-4.77117	-13.2081	-26.511	-14.0809		3.57275	13.4675	6.12599	5.88911	7.14185	20.7391	7.41185	4.09828	4.77117	13.2081	26.511	14.0809
-4.42607	-14.8103	-8.03915	-5.35866	-8.19132	-28.4196	-9.46086	-7.0251	-4.28583	-6.92203	-12.109	-10.5821		4.42607	14.8103	8.03915	5.35866	8.19132	28.4196	9.46086	7.0251	4.28583	6.92203	12.109	10.5821
-4.65595	-3.51875	-6.85462	-5.70889	-9.00473	-16.0518	-10.294	-4.01769	-5.63164	-5.94778	-7.84506	-9.9037		4.65595	3.51875	6.85462	5.70889	9.00473	16.0518	10.294	4.01769	5.63164	5.94778	7.84506	9.9037
-5.86498	-3.94599	-4.61791	-9.12968	-5.63578	-5.11789	-5.47861	-4.48133	-10.0306	-12.6626	-13.2793	-9.64805		5.86498	3.94599	4.61791	9.12968	5.63578	5.11789	5.47861	4.48133	10.0306	12.6626	13.2793	9.64805
-9.22295	-16.6413	-4.30843	-4.42508	-15.5344	-8.66512	-12.936	-5.52353	-4.17609	-6.49975	-4.61532	-6.96141		9.22295	16.6413	4.30843	4.42508	15.5344	8.66512	12.936	5.52353	4.17609	6.49975	4.61532	6.96141
-3.50846	-7.54707	-5.2965	-6.48751	-5.8747	-17.3773	-16.3629	-4.3519	-9.7358	-5.15773	-4.19092	-7.13267		3.50846	7.54707	5.2965	6.48751	5.8747	17.3773	16.3629	4.3519	9.7358	5.15773	4.19092	7.13267
-12.2067	-4.73945	-5.40409	-4.92327	-5.28477	-7.22076	-5.52635	-4.88148	-10.7738	-8.82003	-9.62475	-8.89916		12.2067	4.73945	5.40409	4.92327	5.28477	7.22076	5.52635	4.88148	10.7738	8.82003	9.62475	8.89916
-5.29492	-8.40156	-9.36578	-5.38322	-5.60083	-8.57817	-13.9865	-9.35466	-14.437	-10.3464	-12.3111	-9.80505		5.29492	8.40156	9.36578	5.38322	5.60083	8.57817	13.9865	9.35466	14.437	10.3464	12.3111	9.80505
-7.61162	-3.76289	-11.3855	-8.73845	-14.5785	-5.10175	-8.25118	-9.37105	-17.4295	-6.50341	-5.11223	-5.04279		7.61162	3.76289	11.3855	8.73845	14.5785	5.10175	8.25118	9.37105	17.4295	6.50341	5.11223	5.04279
-12.8558	-3.94599	-12.496	-14.4872	-13.3159	-20.3262	-6.65651	-11.8251	-19.4457	-4.30641	-4.92927	-9.49495		12.8558	3.94599	12.496	14.4872	13.3159	20.3262	6.65651	11.8251	19.4457	4.30641	4.92927	9.49495
-5.09593	-6.63154	-4.81574	-9.31566	-8.19075	-5.24701	-9.63807	-4.20012	-24.5747	-7.23624	-9.93571	-4.91098		5.09593	6.63154	4.81574	9.31566	8.19075	5.24701	9.63807	4.20012	24.5747	7.23624	9.93571	4.91098
-11.9601	-3.82392	-8.33088	-4.6225	-7.22139	-13.1639	-9.94936		-4.06806	-6.0779	-24.7082	-16.9316		11.9601	3.82392	8.33088	4.6225	7.22139	13.1639	9.94936		4.06806	6.0779	24.7082	16.9316
-8.9649	-5.77705	-4.52602	-13.4779	-12.0568	-12.4791	-6.12882		-5.77823	-8.39777	-12.5624	-10.2753		8.9649	5.77705	4.52602	13.4779	12.0568	12.4791	6.12882		5.77823	8.39777	12.5624	10.2753
-3.58021	-3.82392	-5.87863	-11.2135	-5.59397	-9.56491	-10.0538		-4.80673	-5.47015	-7.00893	-5.57408		3.58021	3.82392	5.87863	11.2135	5.59397	9.56491	10.0538		4.80673	5.47015	7.00893	5.57408
-3.45811	-4.86152	-6.61741	-7.0639	-12.2153	-10.1879	-5.81358		-8.35423	-4.06664	-6.82591	-14.2585		3.45811	4.86152	6.61741	7.0639	12.2153	10.1879	5.81358		8.35423	4.06664	6.82591	14.2585
-4.60853	-4.00703	-4.75371	-15.1955	-9.31736	-10.6742	-6.407		-6.46506	-15.1777	-4.20632	-4.0627		4.60853	4.00703	4.75371	15.1955	9.31736	10.6742	6.407		6.46506	15.1777	4.20632	4.0627
-12.4781	-3.70185	-5.37323	-6.59239	-7.40976	-8.29427	-6.49278		-6.83498	-6.08355	-5.6144	-6.91254		12.4781	3.70185	5.37323	6.59239	7.40976	8.29427	6.49278		6.83498	6.08355	5.6144	6.91254
-11.0129	-6.50947	-17.2167	-4.56113	-5.88965	-7.86748	-7.70003		-5.18867	-5.71756	-8.36724	-8.80273		11.0129	6.50947	17.2167	4.56113	5.88965	7.86748	7.70003		5.18867	5.71756	8.36724	8.80273
-5.20858	-3.64082	-5.72292	-12.0956		-7.91507	-8.37233		-4.58136	-6.20616	-8.42942	-5.80637		5.20858	3.64082	5.72292	12.0956		7.91507	8.37233		4.58136	6.20616	8.42942	5.80637
-8.24889	-6.87568	-6.28738	-4.41236		-8.45887	-5.07093		-4.225	-8.83147	-4.34485	-36.4969		8.24889	6.87568	6.28738	4.41236		8.45887	5.07093		4.225	8.83147	4.34485	36.4969
-8.23772	-10.1716	-5.09204	-7.08084		-5.03541	-7.55778		-11.1836	-5.53603	-4.47276	-19.5284		8.23772	10.1716	5.09204	7.08084		5.03541	7.55778		11.1836	5.53603	4.47276	19.5284
	-3.88496	-8.88487	-8.44793		-5.86273	-5.94803		-10.879	-14.9971	-10.6988	-4.97291			3.88496	8.88487	8.44793		5.86273	5.94803		10.879	14.9971	10.6988	4.97291
	-7.24189	-4.83274	-4.27544		-16.5284	-10.7121		-4.47178	-6.08945	-5.79933	-8.01978			7.24189	4.83274	4.27544		16.5284	10.7121		4.47178	6.08945	5.79933	8.01978
	-3.64082	-6.26278	-6.14273		-13.7075	-12.701		-6.54709	-18.7878	-4.76425	-9.42108			3.64082	6.26278	6.14273		13.7075	12.701		6.54709	18.7878	4.76425	9.42108
	-6.69258	-7.96135	-5.25596		-6.80515	-6.53154		-11.7977	-5.36237	-4.91529	-6.0006			6.69258	7.96135	5.25596		6.80515	6.53154		11.7977	5.36237	4.91529	6.0006
	-6.81465	-13.7947	-4.25737		-34.4015	-6.69281		-4.90298	-6.76693	-6.21088	-7.62032			6.81465	13.7947	4.25737		34.4015	6.69281		4.90298	6.76693	6.21088	7.62032
	-4.3122	-9.92727	-8.26968		-5.98556	-7.15633		-9.23868	-4.14472	-4.66908	-6.58144			4.3122	9.92727	8.26968		5.98556	7.15633		9.23868	4.14472	4.66908	6.58144
	-8.03535	-9.41709	-11.6538		-6.72878	-5.93852		-14.0017	-7.80709	-5.6134	-22.3858			8.03535	9.41709	11.6538		6.72878	5.93852		14.0017	7.80709	5.6134	22.3858
	-8.21846	-8.4414	-4.80354		-7.82054	-5.04182		-10.28	-5.06106	-5.11948	-4.00213			8.21846	8.4414	4.80354		7.82054	5.04182		10.28	5.06106	5.11948	4.00213
	-8.09639	-7.25151	-5.68443		-5.56763	-17.2323		-4.90909	-5.12297	-16.0132	-6.05911			8.09639	7.25151	5.68443		5.56763	17.2323		4.90909	5.12297	16.0132	6.05911
	-4.1291	-4.67366	-4.74399		-5.98202	-16.6086		-13.3933	-5.3699	-4.05062	-5.44518			4.1291	4.67366	4.74399		5.98202	16.6086		13.3933	5.3699	4.05062	5.44518
	-4.61738	-4.21332	-9.00314		-10.1871	-8.97441		-10.3415	-5.85855	-4.35555	-20.8071			4.61738	4.21332	9.00314		10.1871	8.97441		10.3415	5.85855	4.35555	20.8071
	-5.65498	-12.3453	-7.51073		-5.03469	-42.6764		-8.69565	-4.51584	-4.35702	-4.32458			5.65498	12.3453	7.51073		5.03469	42.6764		8.69565	4.51584	4.35702	4.32458
	-7.48603	-4.79305	-6.2705		-5.28033	-13.7553		-6.56095	-4.6996	-6.94559	-4.1244			7.48603	4.79305	6.2705		5.28033	13.7553		6.56095	4.6996	6.94559	4.1244
	-13.1623	-5.41262	-5.4169		-14.2992	-20.0379		-11.5659	-5.31011	-8.23425	-9.61517			13.1623	5.41262	5.4169		14.2992	20.0379		11.5659	5.31011	8.23425	9.61517
	-8.88984	-5.75526	-26.0913		-5.69311	-11.6556		-4.36704	-5.24974	-11.9305	-6.49922			8.88984	5.75526	26.0913		5.69311	11.6556		4.36704	5.24974	11.9305	6.49922
	-3.51875	-6.36469	-4.60817		-7.69201	-5.93649		-4.06193	-7.14316	-6.69513	-6.86468			3.51875	6.36469	4.60817		7.69201	5.93649		4.06193	7.14316	6.69513	6.86468
	-4.06806	-5.87903	-6.67714		-6.08813	-29.4951		-5.1621	-5.25113	-6.89475	-6.68113			4.06806	5.87903	6.67714		6.08813	29.4951		5.1621	5.25113	6.89475	6.68113
	-3.94599	-4.63498	-6.48124		-8.50304	-14.9489		-4.97941	-13.3689	-8.75921	-10.7087			3.94599	4.63498	6.48124		8.50304	14.9489		4.97941	13.3689	8.75921	10.7087
	-3.76289	-5.11218	-4.687		-6.56525	-6.12911		-4.61428	-8.11995	-12.9138	-23.9528			3.76289	5.11218	4.687		6.56525	6.12911		4.61428	8.11995	12.9138	23.9528
	-9.19502	-12.1097	-4.38833		-5.94627	-17.6134		-14.7472	-19.4757	-9.04997	-7.83915			9.19502	12.1097	4.38833		5.94627	17.6134		14.7472	19.4757	9.04997	7.83915
	-3.88496	-6.1469	-6.29829		-6.06065	-18.7145			-5.5	-10.2797	-36.7696			3.88496	6.1469	6.29829		6.06065	18.7145			5.5	10.2797	36.7696
	-6.93672	-4.66516	-6.09484		-5.18834	-6.7052			-8.9188	-5.61571	-33.6564			6.93672	4.66516	6.09484		5.18834	6.7052			8.9188	5.61571	33.6564
	-5.28877	-15.2331	-5.45062		-5.59378	-18.7673			-5.56442	-4.82179	-15.5895			5.28877	15.2331	5.45062		5.59378	18.7673			5.56442	4.82179	15.5895
	-3.64082	-5.30459	-8.38421		-13.4553	-9.03638			-18.7488	-4.25779	-6.80018			3.64082	5.30459	8.38421		13.4553	9.03638			18.7488	4.25779	6.80018
	-7.85224	-7.6125	-4.37036		-8.1889	-8.11306			-7.52005	-6.99263	-15.9536			7.85224	7.6125	4.37036		8.1889	8.11306			7.52005	6.99263	15.9536
	-4.49531	-5.53801	-4.65339		-7.78746	-5.40587			-10.2075	-5.10542	-4.84464			4.49531	5.53801	4.65339		7.78746	5.40587			10.2075	5.10542	4.84464
	-10.965	-5.23038	-5.05179		-16.2032	-12.1943			-4.53284	-9.6756	-10.821			10.965	5.23038	5.05179		16.2032	12.1943			4.53284	9.6756	10.821
	-11.5754	-8.24597	-18.5016		-5.35048	-15.8302			-11.0637	-4.46285	-7.83209			11.5754	8.24597	18.5016		5.35048	15.8302			11.0637	4.46285	7.83209
	-12.9182	-4.49731	-6.42053		-11.3722	-6.55519			-6.6716	-19.4915	-15.849			12.9182	4.49731	6.42053		11.3722	6.55519			6.6716	19.4915	15.849
	-3.64082	-9.22769	-5.06213		-8.23568	-6.09718			-12.2875	-8.71671	-4.89178			3.64082	9.22769	5.06213		8.23568	6.09718			12.2875	8.71671	4.89178
	-7.24189	-4.48593	-4.36312		-10.8317	-15.2571			-5.57421	-8.7203	-8.87422			7.24189	4.48593	4.36312		10.8317	15.2571			5.57421	8.7203	8.87422
	-3.82392	-6.72699	-31.2271		-5.01588	-13.302			-4.04863	-9.17083	-4.33264			3.82392	6.72699	31.2271		5.01588	13.302			4.04863	9.17083	4.33264
	-4.61738	-6.36809	-17.6089		-11.2588	-14.8902			-8.5658	-8.1018	-15.5114			4.61738	6.36809	17.6089		11.2588	14.8902			8.5658	8.1018	15.5114
	-6.02119	-7.65646	-6.86428		-8.64578	-24.2556			-23.7691	-6.12456	-4.28742			6.02119	7.65646	6.86428		8.64578	24.2556			23.7691	6.12456	4.28742
	-3.51875	-7.24595	-5.38341		-15.223	-15.7401			-6.19208	-4.3886	-23.9411			3.51875	7.24595	5.38341		15.223	15.7401			6.19208	4.3886	23.9411
	-3.88496	-5.20905	-13.8156		-6.29854	-6.25287			-6.31436	-9.72655	-5.38612			3.88496	5.20905	13.8156		6.29854	6.25287			6.31436	9.72655	5.38612
	-4.3122	-7.3306	-13.5509		-7.97718	-8.99356			-4.7276	-5.24304	-5.33046			4.3122	7.3306	13.5509		7.97718	8.99356			4.7276	5.24304	5.33046
	-3.64082	-5.34577	-9.0874		-14.1689	-16.1785			-5.2775	-10.2401	-16.0404			3.64082	5.34577	9.0874		14.1689	16.1785			5.2775	10.2401	16.0404
	-4.1291	-4.76125	-5.96704		-12.931	-10.7228			-6.55969	-4.5601	-14.7161			4.1291	4.76125	5.96704		12.931	10.7228			6.55969	4.5601	14.7161
	-7.48603	-5.97418	-8.2257			-7.35326			-5.2192	-6.18692	-4.89283			7.48603	5.97418	8.2257			7.35326			5.2192	6.18692	4.89283
	-3.45771	-6.01147	-5.89224			-6.49585			-18.4659	-8.95518	-6.37013			3.45771	6.01147	5.89224			6.49585			18.4659	8.95518	6.37013
	-11.2702	-4.4303	-6.62221			-9.51573			-4.67356	-10.7436	-7.61345			11.2702	4.4303	6.62221			9.51573			4.67356	10.7436	7.61345
	-5.47187	-12.7431	-5.26553			-7.11573			-35.3138	-8.69258	-6.05125			5.47187	12.7431	5.26553			7.11573			35.3138	8.69258	6.05125
	-6.50947	-8.93999	-12.7913			-7.79616			-5.89613	-11.3705	-5.50522			6.50947	8.93999	12.7913			7.79616			5.89613	11.3705	5.50522
	-4.67842	-4.89607	-5.10323			-5.81286			-6.56922	-7.37913	-5.35717			4.67842	4.89607	5.10323			5.81286			6.56922	7.37913	5.35717
	-10.7819	-5.43595	-6.25822			-11.5817			-7.36395	-5.41664	-4.30485			10.7819	5.43595	6.25822			11.5817			7.36395	5.41664	4.30485
	-3.57978	-5.30143	-6.18618			-14.8126			-5.16674		-5.53297			3.57978	5.30143	6.18618			14.8126			5.16674		5.53297
	-9.50019	-6.42241	-9.14102			-5.03497			-4.80073		-4.10894			9.50019	6.42241	9.14102			5.03497			4.80073		4.10894
	-5.10566	-4.83882	-12.1603			-8.79372			-4.19082		-6.01381			5.10566	4.83882	12.1603			8.79372			4.19082		6.01381
	-4.92256	-4.85284	-6.3049			-7.90886			-5.96343		-7.0659			4.92256	4.85284	6.3049			7.90886			5.96343		7.0659
	-11.2702	-4.73697	-4.33239			-8.48082			-4.31606		-8.0085			11.2702	4.73697	4.33239			8.48082			4.31606		8.0085
	-8.6457	-10.0779	-14.9237			-5.92889			-5.53679		-18.7597			8.6457	10.0779	14.9237			5.92889			5.53679		18.7597
	-6.08222	-9.57362	-8.3641			-19.4607			-4.43822		-11.3318			6.08222	9.57362	8.3641			19.4607			4.43822		11.3318
	-7.36396	-6.98498	-18.7609			-6.44799			-4.49928		-4.26024			7.36396	6.98498	18.7609			6.44799			4.49928		4.26024
	-16.3361	-8.18272	-6.76353			-12.1169			-11.3375		-30.9963			16.3361	8.18272	6.76353			12.1169			11.3375		30.9963
	-6.32636	-10.781	-9.43156			-9.77203			-6.39555		-5.37323			6.32636	10.781	9.43156			9.77203			6.39555		5.37323
	-3.57978	-5.2632	-23.6362			-26.0959			-7.98635		-16.6425			3.57978	5.2632	23.6362			26.0959			7.98635		16.6425
	-4.3122	-5.11336	-8.12634			-5.7157			-6.15656		-11.6405			4.3122	5.11336	8.12634			5.7157			6.15656		11.6405
	-9.56123	-5.98116	-5.77225			-11.0003			-5.43275		-17.2062			9.56123	5.98116	5.77225			11.0003			5.43275		17.2062
	-9.62226	-5.31964	-4.70953			-7.5162			-13.6737		-5.12342			9.62226	5.31964	4.70953			7.5162			13.6737		5.12342
	-12.1857	-5.56581	-9.91555			-5.51415			-6.47506		-5.69556			12.1857	5.56581	9.91555			5.51415			6.47506		5.69556
	-18.3503	-5.34082	-5.87886			-17.1231			-5.07235		-18.2114			18.3503	5.34082	5.87886			17.1231			5.07235		18.2114
	-5.28877	-4.79488	-4.55187			-9.13583			-5.68435		-11.0977			5.28877	4.79488	4.55187			9.13583			5.68435		11.0977
	-6.87568	-4.3351	-5.24381			-6.57331			-4.28427		-11.1351			6.87568	4.3351	5.24381			6.57331			4.28427		11.1351
	-4.19013	-6.10601	-10.8396			-6.89285			-7.16028		-5.33734			4.19013	6.10601	10.8396			6.89285			7.16028		5.33734
	-11.0261	-5.00222	-6.58212			-7.80381			-7.71126		-5.67653			11.0261	5.00222	6.58212			7.80381			7.71126		5.67653
	-4.37324	-8.10989	-9.14736			-7.58891			-4.59896		-5.0515			4.37324	8.10989	9.14736			7.58891			4.59896		5.0515
	-5.59394	-5.64993	-7.36564			-8.40224			-5.63778		-19.9158			5.59394	5.64993	7.36564			8.40224			5.63778		19.9158
		-11.0306	-6.0839			-6.17963			-6.12961		-6.1349				11.0306	6.0839			6.17963			6.12961		6.1349
		-5.20259	-9.61722			-8.70352			-11.6235		-4.99039				5.20259	9.61722			8.70352			11.6235		4.99039
		-5.85278	-10.1919			-6.48296			-7.17088		-5.63603				5.85278	10.1919			6.48296			7.17088		5.63603
		-4.25012	-8.90969			-9.76369			-5.10036		-15.8351				4.25012	8.90969			9.76369			5.10036		15.8351
		-5.08445	-4.72602			-7.10965			-5.52914		-21.1724				5.08445	4.72602			7.10965			5.52914		21.1724
		-6.08357	-11.7074			-11.0122			-4.00645		-6.95727				6.08357	11.7074			11.0122			4.00645		6.95727
		-4.62336	-7.08071			-8.7451			-7.12042		-10.3838				4.62336	7.08071			8.7451			7.12042		10.3838
		-5.54109	-12.3181			-10.7163			-4.13436		-4.19494				5.54109	12.3181			10.7163			4.13436		4.19494
		-4.42879	-9.38563			-8.17065			-4.99411		-5.67855				4.42879	9.38563			8.17065			4.99411		5.67855
		-5.16431	-5.64083			-13.5743			-5.06088		-6.78251				5.16431	5.64083			13.5743			5.06088		6.78251
		-7.28609	-6.10781			-7.81417			-4.33055		-14.5501				7.28609	6.10781			7.81417			4.33055		14.5501
		-6.16543	-8.70419			-14.4487			-20.1391		-14.5863				6.16543	8.70419			14.4487			20.1391		14.5863
		-4.85387	-8.91059			-10.897			-7.99665		-13.0754				4.85387	8.91059			10.897			7.99665		13.0754
		-4.91016	-8.59431			-5.27095			-6.28794		-6.31454				4.91016	8.59431			5.27095			6.28794		6.31454
		-4.8007	-4.85232			-7.81437			-10.6876		-6.37101				4.8007	4.85232			7.81437			10.6876		6.37101
		-5.09595	-4.78173			-12.2526			-9.65108		-7.68851				5.09595	4.78173			12.2526			9.65108		7.68851
		-5.48303	-4.46371			-7.97556			-5.44167		-7.69398				5.48303	4.46371			7.97556			5.44167		7.69398
		-4.62088	-10.4643			-7.77107			-6.42062		-4.71633				4.62088	10.4643			7.77107			6.42062		4.71633
		-5.30049	-13.019			-7.3262			-4.65079		-10.2953				5.30049	13.019			7.3262			4.65079		10.2953
		-8.74018	-6.1065			-7.17882			-4.83398		-4.34426				8.74018	6.1065			7.17882			4.83398		4.34426
		-8.41749	-7.82338			-9.73274			-4.2238		-7.52403				8.41749	7.82338			9.73274			4.2238		7.52403
		-7.86159	-11.082			-12.1553			-7.39878		-4.91382				7.86159	11.082			12.1553			7.39878		4.91382
		-7.05741	-24.5447			-22.6427			-19.4257		-6.32271				7.05741	24.5447			22.6427			19.4257		6.32271
		-6.07104	-5.26047			-6.40698			-5.32673		-11.5805				6.07104	5.26047			6.40698			5.32673		11.5805
		-5.43705	-13.376			-14.4716			-4.10629		-19.2413				5.43705	13.376			14.4716			4.10629		19.2413
		-6.21155	-24.7675			-16.804			-7.40892		-14.1808				6.21155	24.7675			16.804			7.40892		14.1808
		-5.99517	-4.64974			-6.84795			-5.88359		-11.2181				5.99517	4.64974			6.84795			5.88359		11.2181
			-4.31894						-4.54263		-4.3289					4.31894						4.54263		4.3289
			-4.41003						-4.97006		-6.12951					4.41003						4.97006		6.12951
			-19.4401						-5.82627		-4.37265					19.4401						5.82627		4.37265
			-9.96373						-17.7301		-6.81691					9.96373						17.7301		6.81691
			-5.30349						-4.18238		-7.74401					5.30349						4.18238		7.74401
			-5.71897						-9.61751		-7.38415					5.71897						9.61751		7.38415
			-5.93776						-4.97918		-6.2116					5.93776						4.97918		6.2116
			-4.39699						-14.8064		-7.92659					4.39699						14.8064		7.92659
			-8.92944						-5.46908		-4.45106					8.92944						5.46908		4.45106
			-6.13906						-12.1847		-8.80396					6.13906						12.1847		8.80396
			-4.33646						-5.89856		-20.9526					4.33646						5.89856		20.9526
			-4.67567						-5.71648		-7.59285					4.67567						5.71648		7.59285
			-9.87316						-6.93785		-4.8475					9.87316						6.93785		4.8475
			-7.0195						-5.35191		-8.76643					7.0195						5.35191		8.76643
			-5.80251						-6.02355		-5.35327					5.80251						6.02355		5.35327
			-5.13669						-37.5178		-4.90957					5.13669						37.5178		4.90957
			-5.9304						-4.31766		-4.50166					5.9304						4.31766		4.50166
			-4.52607						-41.3671		-4.07614					4.52607						41.3671		4.07614
			-5.70489						-5.54198		-4.38853					5.70489						5.54198		4.38853
			-17.8602						-4.07909		-5.30569					17.8602						4.07909		5.30569
			-4.94864						-7.19582		-9.22909					4.94864						7.19582		9.22909
			-7.08692						-4.99982		-4.59687					7.08692						4.99982		4.59687
			-16.2377						-7.56414		-8.58455					16.2377						7.56414		8.58455
			-4.46279						-5.97824		-5.29861					4.46279						5.97824		5.29861
			-4.77172						-8.91005		-5.76507					4.77172						8.91005		5.76507
			-4.21536						-5.00567		-5.22834					4.21536						5.00567		5.22834
			-6.05071						-11.8416		-6.99487					6.05071						11.8416		6.99487
			-4.81442						-4.94661		-7.67002					4.81442						4.94661		7.67002
			-8.08877						-12.0454		-8.0368					8.08877						12.0454		8.0368
			-7.99107						-8.75104		-5.47918					7.99107						8.75104		5.47918
			-5.20955						-5.1506		-37.5356					5.20955						5.1506		37.5356
			-8.41401								-4.79733					8.41401								4.79733
			-5.53637								-11.3389					5.53637								11.3389
			-6.9477								-4.20336					6.9477								4.20336
			-26.3098								-6.64901					26.3098								6.64901
			-8.72896								-6.03904					8.72896								6.03904
			-17.4431								-8.56331					17.4431								8.56331
			-4.9486								-7.52515					4.9486								7.52515
			-5.99194								-7.41404					5.99194								7.41404
			-13.3423								-6.81326					13.3423								6.81326
			-5.60614								-4.67955					5.60614								4.67955
			-4.51389								-16.6162					4.51389								16.6162
			-5.80385								-5.14353					5.80385								5.14353
			-7.88835													7.88835
			-11.4581													11.4581
			-6.22201													6.22201
			-4.77826													4.77826
			-7.37349													7.37349
			-4.91283													4.91283
			-10.9365													10.9365
			-6.19714													6.19714
			-5.62524													5.62524
			-4.65466													4.65466
			-4.91399													4.91399
			-5.45325													5.45325
			-6.82277													6.82277
			-8.12458													8.12458
			-6.86743													6.86743
			-10.5769													10.5769
			-4.9549													4.9549
			-19.5317													19.5317
			-9.52966													9.52966
			-9.47331													9.47331

## Sheet: wt_Nema
2022_09_06_0027	2022_09_06_0028	2022_09_06_0029	2022_09_08_0000	2022_09_07_0027	2022_09_06_0025	2022_09_07_0029	2022_09_07_0030	2022_09_07_0031	2022_09_07_0032	2022_09_07_0021
0-30s	0-30s	0-30s	0-30s	0-30s	0-30s	0-30s	0-30s	0-30s	30-60s	0-30s
-21.5469	-9.93507	-8.05587	-12.3459	-5.11479	-12.0849	-4.3244	-9.04034	-8.07529	-4.67399	-11.0379		21.5469	9.93507	8.05587	12.3459	5.11479	12.0849	4.3244	9.04034	8.07529	4.67399	11.0379
-12.435	-11.5968	-9.38802	-13.7744	-5.77293	-10.9862	-10.5566	-4.13599	-9.38416	-5.89469	-9.20496		12.435	11.5968	9.38802	13.7744	5.77293	10.9862	10.5566	4.13599	9.38416	5.89469	9.20496
-10.6104	-6.40861	-26.1494	-5.66753	-4.17781	-7.20205	-9.85689	-5.08746	-28.4093	-4.73503	-11.3946		10.6104	6.40861	26.1494	5.66753	4.17781	7.20205	9.85689	5.08746	28.4093	4.73503	11.3946
-11.7017	-6.02484	-27.8388	-11.5333	-7.31296	-9.39932	-8.42042	-7.03966	-18.2871	-4.12467	-16.6419		11.7017	6.02484	27.8388	11.5333	7.31296	9.39932	8.42042	7.03966	18.2871	4.12467	16.6419
-6.57617	-10.0239	-10.4303	-5.37459	-5.72286	-13.7938	-7.47575	-5.56631	-10.6668	-4.73503	-15.238		6.57617	10.0239	10.4303	5.37459	5.72286	13.7938	7.47575	5.56631	10.6668	4.73503	15.238
-7.24907	-16.9097	-8.78869	-11.4777	-13.6433	-15.808	-10.5712	-6.74837	-6.04041	-26.9518	-6.75366		7.24907	16.9097	8.78869	11.4777	13.6433	15.808	10.5712	6.74837	6.04041	26.9518	6.75366
-8.11486	-9.00899	-10.8404	-10.4954	-18.0368	-19.4701	-4.1403	-7.65296	-9.12124	-4.42985	-26.5282		8.11486	9.00899	10.8404	10.4954	18.0368	19.4701	4.1403	7.65296	9.12124	4.42985	26.5282
-7.33289	-9.9307	-6.279	-9.11468	-4.22266	-7.93447	-4.11151	-5.00357	-11.7011	-4.61296	-6.81296		7.33289	9.9307	6.279	9.11468	4.22266	7.93447	4.11151	5.00357	11.7011	4.61296	6.81296
-13.1893	-15.0204	-12.0305	-11.6304	-4.10029	-9.39932	-4.29742	-7.62102	-7.88177	-4.06364	-13.1599		13.1893	15.0204	12.0305	11.6304	4.10029	9.39932	4.29742	7.62102	7.88177	4.06364	13.1599
-8.32412	-15.5214	-6.45817	-7.95558	-11.057	-9.76553	-4.5115	-4.24177	-6.92825	-9.25163	-6.86722		8.32412	15.5214	6.45817	7.95558	11.057	9.76553	4.5115	4.24177	6.92825	9.25163	6.86722
-18.4368	-7.04591	-9.34366	-7.01959	-16.5375	-12.4511	-5.84823	-4.50756	-13.7459	-5.89469	-6.19473		18.4368	7.04591	9.34366	7.01959	16.5375	12.4511	5.84823	4.50756	13.7459	5.89469	6.19473
-7.72387	-7.31145	-8.54469	-13.8262	-23.6714	-8.54483	-4.39729	-9.68747	-12.9285	-5.0402	-7.58988		7.72387	7.31145	8.54469	13.8262	23.6714	8.54483	4.39729	9.68747	12.9285	5.0402	7.58988
-14.2242	-8.98809	-10.4581	-8.08959	-8.79113	-7.07998	-4.15526	-11.5569	-31.3141	-15.9655	-6.48903		14.2242	8.98809	10.4581	8.08959	8.79113	7.07998	4.15526	11.5569	31.3141	15.9655	6.48903
-10.1671	-12.0832	-10.8972	-10.0947	-5.23715	-11.2914	-5.26393	-4.49891	-12.5591	-12.7917	-18.2627		10.1671	12.0832	10.8972	10.0947	5.23715	11.2914	5.26393	4.49891	12.5591	12.7917	18.2627
-7.26575	-6.35607	-6.43355	-6.32604	-5.29434	-15.0756	-5.23008	-6.97709	-16.8543	-5.40641	-6.29903		7.26575	6.35607	6.43355	6.32604	5.29434	15.0756	5.23008	6.97709	16.8543	5.40641	6.29903
-7.64036	-28.6647	-7.82037	-25.6612	-4.1955	-24.6581	-6.37233	-5.30585	-7.43179	-4.0026	-8.00453		7.64036	28.6647	7.82037	25.6612	4.1955	24.6581	6.37233	5.30585	7.43179	4.0026	8.00453
-12.0068	-6.68615	-16.8565	-23.6607	-4.24978	-8.97207	-5.00771	-6.89895	-15.7436	-4.24674	-22.9547		12.0068	6.68615	16.8565	23.6607	4.24978	8.97207	5.00771	6.89895	15.7436	4.24674	22.9547
-7.9265	-8.93352	-8.17067	-10.5216	-4.17327	-10.1928	-6.00745	-8.60414	-6.12532	-4.61296	-6.47119		7.9265	8.93352	8.17067	10.5216	4.17327	10.1928	6.00745	8.60414	6.12532	4.61296	6.47119
-8.01435	-7.23975	-10.8089	-10.2412	-4.34294	-7.6293	-18.3773	-35.4415	-7.12074	-18.651	-6.65009		8.01435	7.23975	10.8089	10.2412	4.34294	7.6293	18.3773	35.4415	7.12074	18.651	6.65009
-23.4	-7.51556	-15.5777	-8.59037	-10.8655	-7.07998	-13.1837	-6.56089	-9.08911	-4.18571	-6.03963		23.4	7.51556	15.5777	8.59037	10.8655	7.07998	13.1837	6.56089	9.08911	4.18571	6.03963
-7.28407	-8.97889	-7.45272	-5.67719	-14.8156	-15.747	-11.4063	-6.59695	-6.84181	-4.0026	-10.6164		7.28407	8.97889	7.45272	5.67719	14.8156	15.747	11.4063	6.59695	6.84181	4.0026	10.6164
-7.77824	-6.23167	-7.91893	-5.98846	-4.98599	-7.56826	-8.04545	-5.15759	-25.4704	-10.5944	-6.76689		7.77824	6.23167	7.91893	5.98846	4.98599	7.56826	8.04545	5.15759	25.4704	10.5944	6.76689
-10.8234	-8.12492	-12.0127	-18.3051	-4.1115	-35.6444	-4.01648	-4.49466	-9.45037	-9.67887	-7.98746		10.8234	8.12492	12.0127	18.3051	4.1115	35.6444	4.01648	4.49466	9.45037	9.67887	7.98746
-6.27275	-6.0492	-6.84035	-14.068	-7.82264	-16.2353	-7.31166	-4.77115	-6.46002	-6.32194	-26.3586		6.27275	6.0492	6.84035	14.068	7.82264	16.2353	7.31166	4.77115	6.46002	6.32194	26.3586
-11.9524	-13.117	-7.17326	-9.19588	-4.64605	-8.6669	-4.01348	-7.39448	-10.8307	-8.27506	-13.0522		11.9524	13.117	7.17326	9.19588	4.64605	8.6669	4.01348	7.39448	10.8307	8.27506	13.0522
-11.2301	-19.0741	-17.2706	-37.0122	-18.6725	-17.7001	-6.56923	-4.51715	-6.5136	-4.12467	-15.0663		11.2301	19.0741	17.2706	37.0122	18.6725	17.7001	6.56923	4.51715	6.5136	4.12467	15.0663
-11.8095	-7.81989	-7.6477	-28.6711	-5.72643	-7.26309	-5.32827	-4.1281	-7.37768	-4.97917	-17.6901		11.8095	7.81989	7.6477	28.6711	5.72643	7.26309	5.32827	4.1281	7.37768	4.97917	17.6901
-18.1568	-10.6795	-12.621	-11.1462	-32.6351	-9.70449	-12.5299	-6.64792	-32.0238	-7.72575	-14.7604		18.1568	10.6795	12.621	11.1462	32.6351	9.70449	12.5299	6.64792	32.0238	7.72575	14.7604
-6.58949	-6.85568	-7.78792	-8.34177	-6.33061	-7.14102	-9.34902	-4.07619	-20.4344	-13.6462	-7.5472		6.58949	6.85568	7.78792	8.34177	6.33061	7.14102	9.34902	4.07619	20.4344	13.6462	7.5472
-6.11742	-7.02887	-7.95356	-8.27367	-7.85133	-9.70449	-5.28753	-5.83058	-10.6355	-4.42985	-9.49874		6.11742	7.02887	7.95356	8.27367	7.85133	9.70449	5.28753	5.83058	10.6355	4.42985	9.49874
-8.57069	-11.4916	-12.5415	-19.2665	-4.73642	-22.2777	-24.6342	-4.4379	-10.1898	-4.18571	-18.2875		8.57069	11.4916	12.5415	19.2665	4.73642	22.2777	24.6342	4.4379	10.1898	4.18571	18.2875
-6.94583	-17.6825	-10.7367	-13.9238	-15.6108	-9.58242	-24.2555	-4.45244	-10.9703	-4.06364	-19.9964		6.94583	17.6825	10.7367	13.9238	15.6108	9.58242	24.2555	4.45244	10.9703	4.06364	19.9964
-7.05748	-9.4321	-8.92193	-8.31781	-4.55323	-8.97207	-25.7735	-9.57705	-6.66458	-5.77262	-6.2619		7.05748	9.4321	8.92193	8.31781	4.55323	8.97207	25.7735	9.57705	6.66458	5.77262	6.2619
-11.8849	-15.131	-8.12355	-23.4482	-7.09378	-14.3432	-5.32652	-4.114	-7.98664	-7.1154	-7.78423		11.8849	15.131	8.12355	23.4482	7.09378	14.3432	5.32652	4.114	7.98664	7.1154	7.78423
-6.70639	-7.24442	-6.15064	-6.7218	-5.72937	-10.62	-5.32304	-4.48105	-18.435	-10.6554	-13.6392		6.70639	7.24442	6.15064	6.7218	5.72937	10.62	5.32304	4.48105	18.435	10.6554	13.6392
-17.0697	-14.3021	-11.2693	-19.5511	-4.11399	-14.3432	-4.27821	-9.01498	-7.25262	-5.77262	-7.29103		17.0697	14.3021	11.2693	19.5511	4.11399	14.3432	4.27821	9.01498	7.25262	5.77262	7.29103
-8.89101	-8.6639	-16.54	-5.14171	-15.6945	-8.42276	-17.2741	-4.56606	-8.98376	-18.7121	-7.89967		8.89101	8.6639	16.54	5.14171	15.6945	8.42276	17.2741	4.56606	8.98376	18.7121	7.89967
-6.16985	-36.1001	-9.03703	-5.76743	-8.72677	-17.8222	-4.62335	-9.37625	-12.6057	-4.12467	-7.95999		6.16985	36.1001	9.03703	5.76743	8.72677	17.8222	4.62335	9.37625	12.6057	4.12467	7.95999
-14.7992	-11.3524	-9.39389	-11.8342	-7.7444	-7.99551	-8.57102	-7.70109	-9.54318	-4.12467	-11.3166		14.7992	11.3524	9.39389	11.8342	7.7444	7.99551	8.57102	7.70109	9.54318	4.12467	11.3166
-8.61071	-14.2617	-10.5677	-8.37644	-5.84618	-8.36172	-7.16158	-4.963	-6.49987	-18.7731	-7.47001		8.61071	14.2617	10.5677	8.37644	5.84618	8.36172	7.16158	4.963	6.49987	18.7731	7.47001
-11.245	-9.37257	-9.88574	-6.66271	-7.11022	-9.94863	-6.00093	-6.21392	-16.9952	-5.10124	-19.7356		11.245	9.37257	9.88574	6.66271	7.11022	9.94863	6.00093	6.21392	16.9952	5.10124	19.7356
-7.36216	-7.65528	-6.33101	-18.6876	-9.41299	-7.38516	-5.87781	-7.70098	-12.0652	-11.3268	-6.67397		7.36216	7.65528	6.33101	18.6876	9.41299	7.38516	5.87781	7.70098	12.0652	11.3268	6.67397
-19.3954	-12.4948	-9.67488	-5.0655	-4.21991	-8.42276	-4.65695	-5.26794	-11.888	-6.74919	-34.8693		19.3954	12.4948	9.67488	5.0655	4.21991	8.42276	4.65695	5.26794	11.888	6.74919	34.8693
-16.2795	-6.36316	-6.20773	-21.6284	-6.77086	-7.69033	-6.54135	-6.52055	-8.46902	-10.1672	-7.09758		16.2795	6.36316	6.20773	21.6284	6.77086	7.69033	6.54135	6.52055	8.46902	10.1672	7.09758
-14.2746	-6.77567	-6.86899	-11.4809	-4.32263	-16.2353	-10.7504	-6.49752	-8.64602	-4.24674	-15.3361		14.2746	6.77567	6.86899	11.4809	4.32263	16.2353	10.7504	6.49752	8.64602	4.24674	15.3361
-10.4025	-11.9692	-7.21864	-23.958	-4.98513	-7.99551	-8.83504	-4.56559	-8.18373	-4.06364	-22.477		10.4025	11.9692	7.21864	23.958	4.98513	7.99551	8.83504	4.56559	8.18373	4.06364	22.477
-8.96101	-11.6364	-7.71479	-7.1189	-10.2256	-13.1225	-4.19202	-7.35169	-13.0824	-4.55192	-17.715		8.96101	11.6364	7.71479	7.1189	10.2256	13.1225	4.19202	7.35169	13.0824	4.55192	17.715
-6.72967	-6.16923	-6.41687	-24.3129	-19.0946	-7.87344	-5.64201	-5.72479	-7.09578	-8.64128	-6.78924		6.72967	6.16923	6.41687	24.3129	19.0946	7.87344	5.64201	5.72479	7.09578	8.64128	6.78924
-11.1217	-25.4689	-14.7887	-13.3138	-7.71971	-10.0707	-12.768	-6.29093	-37.3095	-4.61296	-22.9019		11.1217	25.4689	14.7887	13.3138	7.71971	10.0707	12.768	6.29093	37.3095	4.61296	22.9019
-8.77494	-7.12011	-31.5783	-23.7564	-12.2269	-9.76553	-7.01666	-6.72598	-11.072	-7.84782	-28.8197		8.77494	7.12011	31.5783	23.7564	12.2269	9.76553	7.01666	6.72598	11.072	7.84782	28.8197
-7.5453	-18.0781	-14.3161	-14.6166	-11.7772	-10.559	-5.18437	-5.16729	-20.4437	-4.24674	-23.2642		7.5453	18.0781	14.3161	14.6166	11.7772	10.559	5.18437	5.16729	20.4437	4.24674	23.2642
-6.32712	-12.8411	-21.2337	-9.59633	-7.65458	-7.44619	-5.84714	-4.30936	-10.3663	-6.74919	-27.9019		6.32712	12.8411	21.2337	9.59633	7.65458	7.44619	5.84714	4.30936	10.3663	6.74919	27.9019
-9.25031	-8.82114	-30.9112	-14.0394	-6.41992	-9.27725	-4.25998	-10.4676	-8.48668	-8.15299	-12.5197		9.25031	8.82114	30.9112	14.0394	6.41992	9.27725	4.25998	10.4676	8.48668	8.15299	12.5197
-7.43418	-8.13321	-16.9474	-11.7768	-9.64992	-7.26309	-4.01546	-4.41579	-10.5843	-8.58024	-23.3202		7.43418	8.13321	16.9474	11.7768	9.64992	7.26309	4.01546	4.41579	10.5843	8.58024	23.3202
-23.0607	-11.2432	-10.0112	-17.4837	-14.409	-9.76553	-4.01471	-9.75344	-10.2035	-5.46745	-23.9304		23.0607	11.2432	10.0112	17.4837	14.409	9.76553	4.01471	9.75344	10.2035	5.46745	23.9304
-12.8667	-12.1095	-6.18518	-8.8955	-7.5462	-8.05654	-4.50265	-9.49967	-11.825	-6.74919	-8.54898		12.8667	12.1095	6.18518	8.8955	7.5462	8.05654	4.50265	9.49967	11.825	6.74919	8.54898
-35.5402	-9.46842	-7.67749	-6.99535	-5.27166	-7.75137	-4.36518	-6.96084	-6.12224	-11.571	-10.3721		35.5402	9.46842	7.67749	6.99535	5.27166	7.75137	4.36518	6.96084	6.12224	11.571	10.3721
-15.9587	-6.60236	-16.2845	-8.45404	-4.02768	-7.38516	-4.12073	-5.0014	-8.10633	-7.66471	-6.52671		15.9587	6.60236	16.2845	8.45404	4.02768	7.38516	4.12073	5.0014	8.10633	7.66471	6.52671
-8.33748	-6.83205	-12.2341	-5.01701	-11.4066	-15.5028	-4.79189	-4.10992	-7.3697	-9.73991	-13.9725		8.33748	6.83205	12.2341	5.01701	11.4066	15.5028	4.79189	4.10992	7.3697	9.73991	13.9725
-13.9199	-30.9959	-17.807	-15.2142	-5.95855	-13.4887	-4.85159	-4.22897	-8.7799	-5.52848	-6.7694		13.9199	30.9959	17.807	15.2142	5.95855	13.4887	4.85159	4.22897	8.7799	5.52848	6.7694
-7.16823	-12.289	-13.3322	-14.8029	-5.9166	-7.38516	-4.24096	-5.81516	-16.4962	-20.36	-9.21046		7.16823	12.289	13.3322	14.8029	5.9166	7.38516	4.24096	5.81516	16.4962	20.36	9.21046
-15.5008	-6.77891	-7.46162	-5.48329	-4.88964	-9.21621	-9.23843	-4.68703	-22.0052	-4.0026	-7.37936		15.5008	6.77891	7.46162	5.48329	4.88964	9.21621	9.23843	4.68703	22.0052	4.0026	7.37936
-16.2322	-7.17627	-8.25696	-6.93673	-7.14441	-8.23965	-7.71137	-4.43894	-26.2989	-21.2145	-6.40264		16.2322	7.17627	8.25696	6.93673	7.14441	8.23965	7.71137	4.43894	26.2989	21.2145	6.40264
-6.54612	-8.38088	-6.57149	-6.92033	-10.6803	-11.3524	-4.7765	-4.26993	-17.0161	-6.32194	-20.0725		6.54612	8.38088	6.57149	6.92033	10.6803	11.3524	4.7765	4.26993	17.0161	6.32194	20.0725
-6.87373	-10.5611	-6.81419	-5.3977	-13.4756	-10.3759	-4.95944	-4.54122	-15.7406	-5.58952	-6.70009		6.87373	10.5611	6.81419	5.3977	13.4756	10.3759	4.95944	4.54122	15.7406	5.58952	6.70009
-7.19921	-8.96883	-8.12885	-18.7075	-9.49886	-10.8642	-4.0438	-8.20593	-6.95359	-5.34538	-34.2205		7.19921	8.96883	8.12885	18.7075	9.49886	10.8642	4.0438	8.20593	6.95359	5.34538	34.2205
-10.0251	-10.3353	-7.00725	-16.3644	-7.5927	-9.03311	-5.92169	-8.46222	-9.43467	-7.54264	-7.48697		10.0251	10.3353	7.00725	16.3644	7.5927	9.03311	5.92169	8.46222	9.43467	7.54264	7.48697
-17.4822	-7.45506	-11.5553	-21.4818	-5.81452	-7.56826	-4.57878	-6.03662	-6.40295	-4.55192	-9.1331		17.4822	7.45506	11.5553	21.4818	5.81452	7.56826	4.57878	6.03662	6.40295	4.55192	9.1331
-7.63168	-10.3306	-9.30488	-10.4883	-4.70785	-8.23965	-10.1293	-7.43467	-7.05659	-4.49089	-7.36136		7.63168	10.3306	9.30488	10.4883	4.70785	8.23965	10.1293	7.43467	7.05659	4.49089	7.36136
-10.9179	-7.61384	-11.553	-45.9042	-4.30077	-7.93447	-5.05364	-4.5135	-23.5368	-18.4069	-7.11667		10.9179	7.61384	11.553	45.9042	4.30077	7.93447	5.05364	4.5135	23.5368	18.4069	7.11667
-10.4158	-7.05817	-9.04706	-8.76019	-17.7085	-8.30068	-6.335	-4.15523	-11.7921	-4.12467	-6.2617		10.4158	7.05817	9.04706	8.76019	17.7085	8.30068	6.335	4.15523	11.7921	4.12467	6.2617
-14.05	-6.31259	-9.23605	-16.9662	-5.12687	-8.17861	-5.77143	-4.28494	-10.2667	-9.80094	-15.538		14.05	6.31259	9.23605	16.9662	5.12687	8.17861	5.77143	4.28494	10.2667	9.80094	15.538
-10.3147	-13.074	-9.23957	-5.77798	-27.3368	-10.6811	-4.24537	-5.35118	-15.2751	-6.13883	-10.5941		10.3147	13.074	9.23957	5.77798	27.3368	10.6811	4.24537	5.35118	15.2751	6.13883	10.5941
-7.16331	-12.2361	-17.5457	-6.29587	-8.77721	-27.6488	-6.13721	-6.77602	-13.3731	-4.42985	-9.4912		7.16331	12.2361	17.5457	6.29587	8.77721	27.6488	6.13721	6.77602	13.3731	4.42985	9.4912
-8.51744	-16.073	-12.2576	-22.9465	-4.47125	-9.70449	-5.77013	-5.19915	-7.8301	-4.55192	-23.8341		8.51744	16.073	12.2576	22.9465	4.47125	9.70449	5.77013	5.19915	7.8301	4.55192	23.8341
-7.70173	-12.966	-8.02849	-11.0404	-6.79026	-8.72793	-4.30516	-4.151	-13.5757	-5.58952	-7.65341		7.70173	12.966	8.02849	11.0404	6.79026	8.72793	4.30516	4.151	13.5757	5.58952	7.65341
-32.022	-12.633	-12.3056	-5.8718	-26.1342	-9.70449	-4.60917	-9.31152	-7.37335	-6.93229	-11.7414		32.022	12.633	12.3056	5.8718	26.1342	9.70449	4.60917	9.31152	7.37335	6.93229	11.7414
-10.1866	-9.88676	-9.2179	-24.0411	-6.81577	-27.4657	-4.85261	-4.58157	-14.0457	-4.97917	-7.46633		10.1866	9.88676	9.2179	24.0411	6.81577	27.4657	4.85261	4.58157	14.0457	4.97917	7.46633
-12.474	-6.66851	-11.154	-6.79172	-6.56034	-17.9442	-7.72066	-7.62489	-8.46705	-4.55192	-9.1737		12.474	6.66851	11.154	6.79172	6.56034	17.9442	7.72066	7.62489	8.46705	4.55192	9.1737
-7.88579	-6.86603	-32.2212	-9.23369	-4.79002	-7.50723	-4.24136	-4.23611	-6.33895	-17.0641	-6.91515		7.88579	6.86603	32.2212	9.23369	4.79002	7.50723	4.24136	4.23611	6.33895	17.0641	6.91515
-8.91044	-7.42748	-13.2151	-10.9654	-4.84762	-7.38516	-5.3292	-7.08387	-6.71342	-4.73503	-26.446		8.91044	7.42748	13.2151	10.9654	4.84762	7.38516	5.3292	7.08387	6.71342	4.73503	26.446
-10.3938	-16.195	-8.0976	-12.3153	-12.0163	-8.42276	-4.77807	-4.0907	-14.1506	-5.34538	-15.0919		10.3938	16.195	8.0976	12.3153	12.0163	8.42276	4.77807	4.0907	14.1506	5.34538	15.0919
-7.50001	-8.55063	-12.2649	-15.0698	-8.87971	-10.8642	-11.1212	-6.46143	-7.91702	-9.3737	-10.9353		7.50001	8.55063	12.2649	15.0698	8.87971	10.8642	11.1212	6.46143	7.91702	9.3737	10.9353
-7.16657	-8.21106	-6.08079	-10.4032	-4.33698	-11.7187	-5.01721	-6.31991	-22.42	-4.49089	-20.0895		7.16657	8.21106	6.08079	10.4032	4.33698	11.7187	5.01721	6.31991	22.42	4.49089	20.0895
-10.4277	-20.5572	-6.21598	-12.1939	-4.08556	-9.82656	-4.63593	-7.37782	-17.0381	-14.3786	-20.6985		10.4277	20.5572	6.21598	12.1939	4.08556	9.82656	4.63593	7.37782	17.0381	14.3786	20.6985
-9.4977	-8.64802	-9.21304	-30.4353	-11.6252	-10.559	-10.0645	-8.84016	-13.7053	-6.62712	-11.7869		9.4977	8.64802	9.21304	30.4353	11.6252	10.559	10.0645	8.84016	13.7053	6.62712	11.7869
-8.15095	-7.30965	-10.4506	-76.8336	-14.8909	-25.0243	-5.11745	-4.27992	-8.14785	-17.3693	-8.73477		8.15095	7.30965	10.4506	76.8336	14.8909	25.0243	5.11745	4.27992	8.14785	17.3693	8.73477
-14.0491	-11.8261	-16.4384	-7.3244	-10.909	-8.23965	-4.24658	-4.73935	-32.2769	-16.2096	-6.7168		14.0491	11.8261	16.4384	7.3244	10.909	8.23965	4.24658	4.73935	32.2769	16.2096	6.7168
-6.05713	-7.87698	-17.628	-5.46418	-4.55731	-9.8876	-6.43621	-7.56262	-29.1875	-5.65055	-7.50949		6.05713	7.87698	17.628	5.46418	4.55731	9.8876	6.43621	7.56262	29.1875	5.65055	7.50949
-6.56266	-7.34591	-7.1223	-17.4992	-15.4203	-7.01895	-10.8067	-7.9056	-10.026	-4.30778	-9.15572		6.56266	7.34591	7.1223	17.4992	15.4203	7.01895	10.8067	7.9056	10.026	4.30778	9.15572
-6.3275	-10.7407	-12.8892	-18.6787	-6.01881	-10.498	-6.10058	-5.7631	-14.7989	-9.5568	-6.7751		6.3275	10.7407	12.8892	18.6787	6.01881	10.498	6.10058	5.7631	14.7989	9.5568	6.7751
-6.04083	-10.7758	-9.33655	-10.4881	-10.1688	-8.05654	-10.404	-4.12129	-25.9311	-18.4069	-6.83533		6.04083	10.7758	9.33655	10.4881	10.1688	8.05654	10.404	4.12129	25.9311	18.4069	6.83533
-13.4826	-6.05506	-15.971	-11.0394	-19.9943	-8.97207	-7.77252	-12.729	-13.5831	-4.67399	-16.9643		13.4826	6.05506	15.971	11.0394	19.9943	8.97207	7.77252	12.729	13.5831	4.67399	16.9643
-7.70196	-10.4247	-6.09931	-6.88215	-9.98391	-12.329	-18.4993	-5.52895	-22.5508	-5.34538	-11.8364		7.70196	10.4247	6.09931	6.88215	9.98391	12.329	18.4993	5.52895	22.5508	5.34538	11.8364
-6.84004	-8.84169	-9.00695	-18.3733	-9.18994	-12.5731	-4.26886	-11.053	-13.0268	-5.95573	-24.0427		6.84004	8.84169	9.00695	18.3733	9.18994	12.5731	4.26886	11.053	13.0268	5.95573	24.0427
-19.2445	-9.47967	-6.73434	-11.3021	-7.23583	-8.05654	-11.8359	-4.72021	-6.23702	-4.06364	-17.7533		19.2445	9.47967	6.73434	11.3021	7.23583	8.05654	11.8359	4.72021	6.23702	4.06364	17.7533
-8.6788	-14.2149	-13.3478	-25.8116	-7.17152	-7.14102	-9.93501	-6.07009	-8.20742	-6.01676	-9.75013		8.6788	14.2149	13.3478	25.8116	7.17152	7.14102	9.93501	6.07009	8.20742	6.01676	9.75013
-9.97608	-13.7793	-7.29485	-10.1675	-5.21561	-26.0619	-7.61347	-7.28076	-9.46419	-8.51921	-10.5379		9.97608	13.7793	7.29485	10.1675	5.21561	26.0619	7.61347	7.28076	9.46419	8.51921	10.5379
-9.57126	-13.7422	-7.49297	-12.2225	-4.97115	-12.6952	-7.47348	-4.96299	-7.74478	-4.18571	-6.44645		9.57126	13.7422	7.49297	12.2225	4.97115	12.6952	7.47348	4.96299	7.74478	4.18571	6.44645
-10.5162	-11.1781	-6.61866	-8.47435	-4.47989	-7.6293	-8.93302	-4.05551	-13.2365	-5.95573	-13.8921		10.5162	11.1781	6.61866	8.47435	4.47989	7.6293	8.93302	4.05551	13.2365	5.95573	13.8921
-6.0831	-6.66345	-7.86153	-5.36254	-4.72311	-10.0097	-6.24211	-22.5007	-10.5626	-4.18571	-7.97072		6.0831	6.66345	7.86153	5.36254	4.72311	10.0097	6.24211	22.5007	10.5626	4.18571	7.97072
-8.33885	-16.548	-13.7843	-15.5244	-5.45399	-14.099	-22.346	-5.2748	-16.3032	-4.12467	-8.39787		8.33885	16.548	13.7843	15.5244	5.45399	14.099	22.346	5.2748	16.3032	4.12467	8.39787
-8.10773	-9.66248	-6.11596	-10.7621	-4.9646	-9.8876	-16.2971	-11.0647	-14.1754	-4.79606	-13.8872		8.10773	9.66248	6.11596	10.7621	4.9646	9.8876	16.2971	11.0647	14.1754	4.79606	13.8872
-16.0927	-7.53658	-37.3434	-12.6339	-4.04806	-10.9862	-4.9424	-8.41983	-8.42574	-4.24674	-13.8215		16.0927	7.53658	37.3434	12.6339	4.04806	10.9862	4.9424	8.41983	8.42574	4.24674	13.8215
-9.55858	-14.1317	-6.89487	-10.8529	-5.63426	-8.6669	-4.55458	-17.0092	-12.2042	-4.18571	-9.12167		9.55858	14.1317	6.89487	10.8529	5.63426	8.6669	4.55458	17.0092	12.2042	4.18571	9.12167
-25.6552	-14.1036	-8.75162	-8.52535	-4.41162	-9.15518	-5.04267	-12.7373	-7.46402	-4.0026	-22.4216		25.6552	14.1036	8.75162	8.52535	4.41162	9.15518	5.04267	12.7373	7.46402	4.0026	22.4216
-6.57539	-6.01227	-14.0903	-6.40705	-8.54994	-7.87344	-4.73733	-21.171	-15.6445	-4.61296	-19.9764		6.57539	6.01227	14.0903	6.40705	8.54994	7.87344	4.73733	21.171	15.6445	4.61296	19.9764
-6.09497	-9.77454	-15.4463	-21.5097	-7.87445	-8.11758	-12.4265	-9.10557	-28.6269	-4.61296	-8.50156		6.09497	9.77454	15.4463	21.5097	7.87445	8.11758	12.4265	9.10557	28.6269	4.61296	8.50156
-7.62753	-13.1432	-11.4602	-9.31776	-13.1702	-9.94863	-5.52089	-9.9169	-16.0525	-5.0402	-10.0272		7.62753	13.1432	11.4602	9.31776	13.1702	9.94863	5.52089	9.9169	16.0525	5.0402	10.0272
-7.99944	-6.14697	-8.71521	-9.07769	-5.23151	-9.09414	-16.1396	-4.19373	-7.73108	-10.2282	-6.11233		7.99944	6.14697	8.71521	9.07769	5.23151	9.09414	16.1396	4.19373	7.73108	10.2282	6.11233
-7.8175	-7.93749	-13.7803	-46.1899	-20.1809	-14.2211	-4.6564	-5.73064	-10.151	-5.22331	-13.7417		7.8175	7.93749	13.7803	46.1899	20.1809	14.2211	4.6564	5.73064	10.151	5.22331	13.7417
-6.38374	-7.22185	-6.02769	-7.47721	-5.16421	-7.20205	-34.011	-5.15697	-8.10374	-36.0461	-6.23101		6.38374	7.22185	6.02769	7.47721	5.16421	7.20205	34.011	5.15697	8.10374	36.0461	6.23101
-9.17403	-16.9594	-24.0625	-41.3692	-4.30564	-27.1605	-8.91041	-5.63234	-37.1252	-4.24674	-13.5521		9.17403	16.9594	24.0625	41.3692	4.30564	27.1605	8.91041	5.63234	37.1252	4.24674	13.5521
-8.89591	-9.47265	-13.2421	-20.7085	-5.5253	-8.11758	-6.15874	-6.37546	-8.00854	-4.91813	-6.28761		8.89591	9.47265	13.2421	20.7085	5.5253	8.11758	6.15874	6.37546	8.00854	4.91813	6.28761
-6.33147	-10.7891	-10.3305	-5.25652	-8.27053	-7.07998	-4.38806	-6.63539	-11.756	-4.12467	-14.1526		6.33147	10.7891	10.3305	5.25652	8.27053	7.07998	4.38806	6.63539	11.756	4.12467	14.1526
-11.748	-6.02694	-12.2053	-11.8804	-6.56069	-12.8783	-6.45945	-4.85378	-15.9235	-12.6696	-6.94313		11.748	6.02694	12.2053	11.8804	6.56069	12.8783	6.45945	4.85378	15.9235	12.6696	6.94313
-6.06379	-10.4648	-12.2719	-8.57005	-4.97352	-9.64346	-4.5351	-4.33231	-7.20076	-19.2004	-19.1493		6.06379	10.4648	12.2719	8.57005	4.97352	9.64346	4.5351	4.33231	7.20076	19.2004	19.1493
-6.67844	-10.0709	-7.62373	-14.9611	-6.43256	-10.0097	-11.9152	-5.64459	-6.56966	-7.96989	-28.4867		6.67844	10.0709	7.62373	14.9611	6.43256	10.0097	11.9152	5.64459	6.56966	7.96989	28.4867
-20.5623	-7.31387	-6.03624	-6.24558	-4.17226	-10.4369	-4.46023	-9.66118	-6.16774	-4.67399	-6.81893		20.5623	7.31387	6.03624	6.24558	4.17226	10.4369	4.46023	9.66118	6.16774	4.67399	6.81893
-6.34704	-8.43197	-14.5583	-18.6476	-6.73235	-12.0849	-7.50364	-5.3282	-10.9556	-5.58952	-17.6827		6.34704	8.43197	14.5583	18.6476	6.73235	12.0849	7.50364	5.3282	10.9556	5.58952	17.6827
-7.62514	-8.46974	-9.36253	-7.99549	-6.18165	-8.23965	-4.37791	-4.73001	-8.3276	-8.64128	-13.288		7.62514	8.46974	9.36253	7.99549	6.18165	8.23965	4.37791	4.73001	8.3276	8.64128	13.288
-7.19891	-14.2685	-17.3117	-5.84881	-4.53172	-20.3856	-19.8749	-5.11189	-7.23072	-6.93229	-13.1635		7.19891	14.2685	17.3117	5.84881	4.53172	20.3856	19.8749	5.11189	7.23072	6.93229	13.1635
-13.2183	-13.0823	-10.2733	-7.00777	-7.76437	-18.5546	-4.85951	-5.13962	-8.59416	-4.79606	-11.2102		13.2183	13.0823	10.2733	7.00777	7.76437	18.5546	4.85951	5.13962	8.59416	4.79606	11.2102
-17.3055	-9.5453	-8.17577	-47.9478	-10.4373	-12.268	-5.83105	-6.11366	-17.5641	-4.0026	-9.37853		17.3055	9.5453	8.17577	47.9478	10.4373	12.268	5.83105	6.11366	17.5641	4.0026	9.37853
-27.6066	-11.5313	-8.80384	-7.5649	-5.00477	-12.39	-6.96135	-5.26424	-10.2791	-14.3175	-7.42306		27.6066	11.5313	8.80384	7.5649	5.00477	12.39	6.96135	5.26424	10.2791	14.3175	7.42306
-11.3682	-7.20365	-7.27715	-12.1825	-8.40785	-20.5077	-10.7323	-8.50538	-21.37	-12.6696	-14.0138		11.3682	7.20365	7.27715	12.1825	8.40785	20.5077	10.7323	8.50538	21.37	12.6696	14.0138
-7.41192	-6.84303	-16.5068	-10.1719	-6.39284	-16.9066	-4.31304	-4.36914	-15.8655	-7.48161	-6.32184		7.41192	6.84303	16.5068	10.1719	6.39284	16.9066	4.31304	4.36914	15.8655	7.48161	6.32184
-17.1947	-7.10047	-6.33303	-6.30713	-8.64338	-8.11758	-6.26555	-9.35548	-10.8254	-6.19987	-13.1479		17.1947	7.10047	6.33303	6.30713	8.64338	8.11758	6.26555	9.35548	10.8254	6.19987	13.1479
-8.99894	-29.2344	-6.44389	-11.466	-4.123	-13.6107	-4.92262	-9.73494	-11.8934	-5.0402	-11.0114		8.99894	29.2344	6.44389	11.466	4.123	13.6107	4.92262	9.73494	11.8934	5.0402	11.0114
-9.39874	-6.99425	-8.82541	-11.7205	-15.961	-25.3295	-4.4293	-6.78883	-21.5202	-5.40641	-7.03796		9.39874	6.99425	8.82541	11.7205	15.961	25.3295	4.4293	6.78883	21.5202	5.40641	7.03796
-8.14415	-16.838	-9.62477	-7.32803	-4.14795	-9.15518	-6.62574	-5.06535	-11.4153	-4.18571	-12.7721		8.14415	16.838	9.62477	7.32803	4.14795	9.15518	6.62574	5.06535	11.4153	4.18571	12.7721
-8.42411	-6.05901	-10.0336	-17.3365	-6.14573	-9.33828	-7.96742	-5.69137	-8.28217	-6.2609	-15.3956		8.42411	6.05901	10.0336	17.3365	6.14573	9.33828	7.96742	5.69137	8.28217	6.2609	15.3956
-16.6872	-7.17491	-24.6339	-11.8116	-4.06646	-7.6293	-12.4763	-6.04845	-9.84268	-5.16227	-8.25315		16.6872	7.17491	24.6339	11.8116	4.06646	7.6293	12.4763	6.04845	9.84268	5.16227	8.25315
-7.35807	-20.7896	-11.9842	-18.186	-5.03659	-12.268	-4.05328	-6.10127	-6.00879	-10.9606	-7.45542		7.35807	20.7896	11.9842	18.186	5.03659	12.268	4.05328	6.10127	6.00879	10.9606	7.45542
-7.48701	-8.47767	-8.79436	-5.38693	-5.03337	-10.3148	-9.36017	-8.52777	-6.59978	-5.16227	-14.8335		7.48701	8.47767	8.79436	5.38693	5.03337	10.3148	9.36017	8.52777	6.59978	5.16227	14.8335
-7.79859	-15.3503	-20.6517	-21.2656	-5.33822	-10.4369	-9.96567	-7.00066	-6.65805	-17.7355	-13.1844		7.79859	15.3503	20.6517	21.2656	5.33822	10.4369	9.96567	7.00066	6.65805	17.7355	13.1844
-9.25025	-12.1808	-10.7979	-8.63485	-12.3569	-7.44619	-7.03552	-4.57949	-10.6147	-11.5099	-14.2711		9.25025	12.1808	10.7979	8.63485	12.3569	7.44619	7.03552	4.57949	10.6147	11.5099	14.2711
-11.7275	-9.28592	-26.12	-5.50933	-28.7632	-8.11758	-7.21643	-4.35758	-8.35009	-9.19059	-14.9393		11.7275	9.28592	26.12	5.50933	28.7632	8.11758	7.21643	4.35758	8.35009	9.19059	14.9393
-6.13949	-10.212	-9.51003	-14.7136	-8.24881	-8.23965	-4.34328	-7.10837	-11.6582	-4.30778	-7.12254		6.13949	10.212	9.51003	14.7136	8.24881	8.23965	4.34328	7.10837	11.6582	4.30778	7.12254
-11.5707	-10.0057	-6.88074	-37.6952	-4.76937	-31.1889	-4.28026	-17.9019	-12.8857	-4.30778	-12.1856		11.5707	10.0057	6.88074	37.6952	4.76937	31.1889	4.28026	17.9019	12.8857	4.30778	12.1856
-11.8984	-7.82877	-7.60633	-8.1496	-4.39385	-17.0897	-4.11633	-6.00544	-11.1976	-5.16227	-7.72325		11.8984	7.82877	7.60633	8.1496	4.39385	17.0897	4.11633	6.00544	11.1976	5.16227	7.72325
-6.15883	-6.87441	-13.8902	-12.6424	-10.772	-9.52139	-14.895	-4.32761	-7.80083	-8.3361	-7.47833		6.15883	6.87441	13.8902	12.6424	10.772	9.52139	14.895	4.32761	7.80083	8.3361	7.47833
-8.8744	-6.96067	-6.97066	-5.02325	-5.15316	-10.3759	-12.0164	-4.14874	-13.5088	-6.56608	-9.79637		8.8744	6.96067	6.97066	5.02325	5.15316	10.3759	12.0164	4.14874	13.5088	6.56608	9.79637
-7.80861	-7.35933	-11.9176	-23.2457	-7.40522	-16.4184	-9.85279	-4.69412	-6.3769	-4.97917	-9.12463		7.80861	7.35933	11.9176	23.2457	7.40522	16.4184	9.85279	4.69412	6.3769	4.97917	9.12463
-6.01948	-10.1415	-8.59561	-14.8044	-4.10886	-10.3148	-17.034	-8.91092	-11.7195	-7.96989	-6.74395		6.01948	10.1415	8.59561	14.8044	4.10886	10.3148	17.034	8.91092	11.7195	7.96989	6.74395
-7.11642	-6.72411	-6.40588	-5.55877	-5.14473	-7.07998	-4.25777	-6.88835	-6.35973	-5.77262	-7.16788		7.11642	6.72411	6.40588	5.55877	5.14473	7.07998	4.25777	6.88835	6.35973	5.77262	7.16788
-11.5221	-6.7921	-7.11428	-5.87635	-5.083	-7.38516	-4.81094	-4.02455	-12.397	-4.30778	-8.07881		11.5221	6.7921	7.11428	5.87635	5.083	7.38516	4.81094	4.02455	12.397	4.30778	8.07881
-9.70317	-6.70988	-8.70018	-24.2607	-7.70708	-8.78897	-4.33721	-4.39885	-9.14007	-13.0968	-7.89455		9.70317	6.70988	8.70018	24.2607	7.70708	8.78897	4.33721	4.39885	9.14007	13.0968	7.89455
-8.58671	-20.6961	-6.47815	-8.85293	-8.74318	-19.8974	-7.42812	-5.76837	-8.15763	-4.12467	-10.6907		8.58671	20.6961	6.47815	8.85293	8.74318	19.8974	7.42812	5.76837	8.15763	4.12467	10.6907
-9.07744	-9.40692	-9.5788	-5.12134	-4.10411	-8.36172	-4.99936	-4.7397	-6.36945	-6.01676	-11.301		9.07744	9.40692	9.5788	5.12134	4.10411	8.36172	4.99936	4.7397	6.36945	6.01676	11.301
-8.62305	-8.06255	-6.89991	-6.99397	-7.511	-7.20205	-6.0787	-4.42282	-9.39533	-4.12467	-10.8733		8.62305	8.06255	6.89991	6.99397	7.511	7.20205	6.0787	4.42282	9.39533	4.12467	10.8733
-8.17494	-8.25371	-8.57932	-7.66753	-6.16638	-12.5731	-33.6345	-5.07751	-13.8881	-4.97917	-14.9622		8.17494	8.25371	8.57932	7.66753	6.16638	12.5731	33.6345	5.07751	13.8881	4.97917	14.9622
-6.06819	-9.11231	-12.6447	-9.61438	-9.33687	-7.20205	-5.23826	-11.8502	-9.55198	-11.5099	-6.23055		6.06819	9.11231	12.6447	9.61438	9.33687	7.20205	5.23826	11.8502	9.55198	11.5099	6.23055
-6.69521	-6.2632	-16.3084	-11.4819	-4.08679	-12.4511	-4.49528	-4.37613	-10.0778	-6.13883	-7.2674		6.69521	6.2632	16.3084	11.4819	4.08679	12.4511	4.49528	4.37613	10.0778	6.13883	7.2674
-10.7812	-9.18284	-12.9031	-24.2949	-5.79418	-9.15518	-7.14376	-4.02798	-15.8824	-5.34538	-9.34002		10.7812	9.18284	12.9031	24.2949	5.79418	9.15518	7.14376	4.02798	15.8824	5.34538	9.34002
-6.71131	-7.36757	-7.00923	-5.88644	-4.22614	-10.8031	-13.6978	-4.85931	-27.6232	-4.18571	-13.3033		6.71131	7.36757	7.00923	5.88644	4.22614	10.8031	13.6978	4.85931	27.6232	4.18571	13.3033
-7.06584	-7.98356	-6.0321	-20.7371	-12.0184	-28.7475	-10.8356	-4.94626	-14.7472	-11.0827	-8.60134		7.06584	7.98356	6.0321	20.7371	12.0184	28.7475	10.8356	4.94626	14.7472	11.0827	8.60134
-11.1535	-14.5744	-15.979	-23.1786	-5.53579	-7.20205	-4.23794	-4.08343	-9.30506	-4.42985	-12.4459		11.1535	14.5744	15.979	23.1786	5.53579	7.20205	4.23794	4.08343	9.30506	4.42985	12.4459
-9.40452	-9.42714	-6.14357	-7.54116	-4.06643	-10.4369	-12.2039	-4.89708	-6.24326	-5.16227	-15.8634		9.40452	9.42714	6.14357	7.54116	4.06643	10.4369	12.2039	4.89708	6.24326	5.16227	15.8634
-9.81786	-7.0127	-8.67656	-13.5753	-19.2612	-7.93447	-7.20931	-7.13095	-7.95383	-4.0026	-12.6268		9.81786	7.0127	8.67656	13.5753	19.2612	7.93447	7.20931	7.13095	7.95383	4.0026	12.6268
-6.23035	-6.43652	-6.67008	-7.72249	-14.7944	-12.8173	-4.7034	-7.50887	-11.6341	-6.56608	-10.6112		6.23035	6.43652	6.67008	7.72249	14.7944	12.8173	4.7034	7.50887	11.6341	6.56608	10.6112
-6.62248	-7.93544	-6.21736	-7.91209	-14.4194	-12.268	-9.4884	-7.20475	-13.0473	-7.1154	-8.22681		6.62248	7.93544	6.21736	7.91209	14.4194	12.268	9.4884	7.20475	13.0473	7.1154	8.22681
-10.2534	-7.30646	-7.00637	-8.89656	-12.3959	-8.48379	-4.19533	-6.54181	-7.35483	-8.94645	-20.9212		10.2534	7.30646	7.00637	8.89656	12.3959	8.48379	4.19533	6.54181	7.35483	8.94645	20.9212
-7.7738	-14.8232	-8.91646	-28.1616	-11.0774	-8.11758	-5.63053	-6.57257	-7.36241	-5.40641	-8.58815		7.7738	14.8232	8.91646	28.1616	11.0774	8.11758	5.63053	6.57257	7.36241	5.40641	8.58815
-10.8266	-6.90239	-8.39223	-23.9783	-5.81155	-7.38516	-4.70265	-5.48853	-13.6664	-4.97917	-7.12285		10.8266	6.90239	8.39223	23.9783	5.81155	7.38516	4.70265	5.48853	13.6664	4.97917	7.12285
-9.19907	-6.72696	-6.13257	-6.77661	-18.3691	-7.75137	-4.3504	-8.04227	-7.02469	-4.91813	-6.9378		9.19907	6.72696	6.13257	6.77661	18.3691	7.75137	4.3504	8.04227	7.02469	4.91813	6.9378
-7.49418	-9.44217	-8.98685	-19.2034	-4.14146	-7.07998	-5.22288	-9.95391	-9.15119	-4.06364	-7.73101		7.49418	9.44217	8.98685	19.2034	4.14146	7.07998	5.22288	9.95391	9.15119	4.06364	7.73101
-15.8172	-6.80694	-6.765	-10.179	-5.36158	-14.038	-6.84923	-7.06753	-10.4515	-5.22331	-8.33954		15.8172	6.80694	6.765	10.179	5.36158	14.038	6.84923	7.06753	10.4515	5.22331	8.33954
-6.36221	-8.83217	-11.8257	-11.3981	-4.07945	-7.44619	-8.11053	-15.7734	-6.73376	-4.24674	-7.48227		6.36221	8.83217	11.8257	11.3981	4.07945	7.44619	8.11053	15.7734	6.73376	4.24674	7.48227
-12.8803	-8.53312	-10.5776	-14.5964	-7.92439	-8.72793	-4.15175	-5.4738	-7.634	-4.0026	-10.4721		12.8803	8.53312	10.5776	14.5964	7.92439	8.72793	4.15175	5.4738	7.634	4.0026	10.4721
-17.6119	-21.6038	-6.61761	-14.8936	-5.26652	-7.8124	-17.2957	-5.2207	-6.92959	-17.3083	-9.73205		17.6119	21.6038	6.61761	14.8936	5.26652	7.8124	17.2957	5.2207	6.92959	17.3083	9.73205
-6.61194	-15.934	-7.46501	-10.1408	-7.15246	-7.56826	-5.00041	-9.29328	-9.36043	-9.31266	-27.6151		6.61194	15.934	7.46501	10.1408	7.15246	7.56826	5.00041	9.29328	9.36043	9.31266	27.6151
-7.24734	-7.23226	-9.41647	-8.41178	-9.8266	-13.8549	-4.62805	-4.19	-10.277	-21.0924	-20.7753		7.24734	7.23226	9.41647	8.41178	9.8266	13.8549	4.62805	4.19	10.277	21.0924	20.7753
-6.29525	-7.59926	-8.03945	-10.6792	-6.16325	-8.54483	-10.3417	-4.94292	-7.8447	-12.0592	-17.7189		6.29525	7.59926	8.03945	10.6792	6.16325	8.54483	10.3417	4.94292	7.8447	12.0592	17.7189
-9.9451	-6.49558	-10.3521	-42.7134	-4.32821	-9.27725	-7.41061	-6.70316	-12.4414	-11.4489	-10.4545		9.9451	6.49558	10.3521	42.7134	4.32821	9.27725	7.41061	6.70316	12.4414	11.4489	10.4545
-7.40923	-9.36847	-9.34311	-7.79833	-4.0222	-7.8124	-5.00739	-7.33678	-6.31426	-4.30778	-8.68147		7.40923	9.36847	9.34311	7.79833	4.0222	7.8124	5.00739	7.33678	6.31426	4.30778	8.68147
-7.47861	-9.6537	-7.8783	-8.85212	-4.44922	-18.0663	-6.09251	-4.69464	-15.4285	-9.12955	-15.4554		7.47861	9.6537	7.8783	8.85212	4.44922	18.0663	6.09251	4.69464	15.4285	9.12955	15.4554
-9.35562	-6.13359	-10.0156	-15.328	-4.81061	-14.2211	-5.47878	-5.33266	-21.6349	-27.7453	-12.8917		9.35562	6.13359	10.0156	15.328	4.81061	14.2211	5.47878	5.33266	21.6349	27.7453	12.8917
-6.20602	-7.84977	-11.3015	-7.19551	-4.38247	-8.54483	-4.30855	-7.42526	-6.60549	-4.0026	-7.45905		6.20602	7.84977	11.3015	7.19551	4.38247	8.54483	4.30855	7.42526	6.60549	4.0026	7.45905
-7.54824	-11.1513	-13.814	-36.1073	-5.45824	-12.6952	-5.87759	-8.85801	-9.68591	-4.42985	-21.4355		7.54824	11.1513	13.814	36.1073	5.45824	12.6952	5.87759	8.85801	9.68591	4.42985	21.4355
-9.52376	-12.9175	-7.96403	-9.72814	-4.53244	-8.72793	-4.52453	-4.21045	-9.30231	-6.87126	-8.06271		9.52376	12.9175	7.96403	9.72814	4.53244	8.72793	4.52453	4.21045	9.30231	6.87126	8.06271
-6.7575	-10.3756	-14.1597	-6.05483	-4.27634	-7.14102	-4.63272	-5.49091	-18.2486	-4.73503	-6.41274		6.7575	10.3756	14.1597	6.05483	4.27634	7.14102	4.63272	5.49091	18.2486	4.73503	6.41274
-13.8982	-11.6327	-9.82455	-11.5795	-12.6876	-9.58242	-6.92887	-4.36577	-6.94651	-4.06364	-14.7729		13.8982	11.6327	9.82455	11.5795	12.6876	9.58242	6.92887	4.36577	6.94651	4.06364	14.7729
-8.86514	-9.20751	-8.8258	-13.8252	-15.8596	-17.7001	-9.28923	-5.21907	-12.1269	-14.1955	-7.08198		8.86514	9.20751	8.8258	13.8252	15.8596	17.7001	9.28923	5.21907	12.1269	14.1955	7.08198
-15.4384	-7.64677	-14.6985	-5.59753	-6.57633	-7.6293	-11.4191	-5.73785	-16.4305	-7.35954	-7.50911		15.4384	7.64677	14.6985	5.59753	6.57633	7.6293	11.4191	5.73785	16.4305	7.35954	7.50911
-6.42109	-8.76013	-7.74304	-6.8195	-4.55489	-11.1083	-8.7697	-6.43671	-7.69422	-4.36881	-12.3268		6.42109	8.76013	7.74304	6.8195	4.55489	11.1083	8.7697	6.43671	7.69422	4.36881	12.3268
-11.0762	-9.28158	-12.4321	-6.53624	-33.7794	-10.498	-5.305	-5.16827	-8.47468	-22.3742	-7.80489		11.0762	9.28158	12.4321	6.53624	33.7794	10.498	5.305	5.16827	8.47468	22.3742	7.80489
-8.02264	-7.43276	-7.93358	-17.3081	-12.3406	-16.3573	-8.08431	-9.93911	-14.2926	-8.58024	-7.98381		8.02264	7.43276	7.93358	17.3081	12.3406	16.3573	8.08431	9.93911	14.2926	8.58024	7.98381
-14.2201	-12.2787	-7.02421	-21.7028	-8.33582	-7.07998	-4.92143	-16.8214	-6.10781	-20.1159	-7.25111		14.2201	12.2787	7.02421	21.7028	8.33582	7.07998	4.92143	16.8214	6.10781	20.1159	7.25111
-10.359	-7.97762	-7.53797	-5.44572	-6.86644	-8.11758	-8.27221	-5.40871	-11.1911	-5.71159	-7.30308		10.359	7.97762	7.53797	5.44572	6.86644	8.11758	8.27221	5.40871	11.1911	5.71159	7.30308
-12.9005	-6.65303	-12.7877	-12.7108	-5.15725	-15.9301	-4.00173	-11.8664	-11.9612	-10.8385	-13.4663		12.9005	6.65303	12.7877	12.7108	5.15725	15.9301	4.00173	11.8664	11.9612	10.8385	13.4663
-8.96552	-6.28109	-8.32174	-8.85053	-4.11076	-7.01895	-4.20792	-8.2925	-8.69378	-7.05436	-10.8416		8.96552	6.28109	8.32174	8.85053	4.11076	7.01895	4.20792	8.2925	8.69378	7.05436	10.8416
-13.8514	-14.6426	-9.75753	-23.8945	-5.45295	-28.5644	-7.69846	-6.10819	-10.1779	-5.16227	-13.8901		13.8514	14.6426	9.75753	23.8945	5.45295	28.5644	7.69846	6.10819	10.1779	5.16227	13.8901
-19.7724	-10.1166	-8.00673	-10.9456	-4.35398	-10.9252	-4.43471	-4.67066	-11.3425	-12.2423	-11.6299		19.7724	10.1166	8.00673	10.9456	4.35398	10.9252	4.43471	4.67066	11.3425	12.2423	11.6299
-7.40354	-6.00363	-8.74455	-22.2121	-4.63056	-9.76553	-9.64718	-5.43937	-16.7561	-5.16227	-7.66145		7.40354	6.00363	8.74455	22.2121	4.63056	9.76553	9.64718	5.43937	16.7561	5.16227	7.66145
-12.9606	-11.0507	-9.26335	-10.8095	-4.56591	-7.44619	-16.4267	-6.78553	-9.12706	-6.0778	-7.84222		12.9606	11.0507	9.26335	10.8095	4.56591	7.44619	16.4267	6.78553	9.12706	6.0778	7.84222
-7.46654	-7.49856	-10.8774	-5.04741	-5.71592	-12.0849	-4.90469	-7.16376	-6.47055	-5.28434	-6.31631		7.46654	7.49856	10.8774	5.04741	5.71592	12.0849	4.90469	7.16376	6.47055	5.28434	6.31631
-22.899	-10.9813	-9.61606	-5.07695	-4.3544	-8.60586	-7.35218	-7.00613	-9.09838	-4.06364	-7.71529		22.899	10.9813	9.61606	5.07695	4.3544	8.60586	7.35218	7.00613	9.09838	4.06364	7.71529
-8.51738	-15.7151	-6.67822	-9.29243	-4.35414	-7.69033	-4.93635	-7.89429	-19.941	-4.24674	-6.43344		8.51738	15.7151	6.67822	9.29243	4.35414	7.69033	4.93635	7.89429	19.941	4.24674	6.43344
-11.8841	-13.9907	-14.08	-16.7211	-4.29288	-9.94863	-10.4367	-5.13743	-6.28232	-12.6086	-10.7669		11.8841	13.9907	14.08	16.7211	4.29288	9.94863	10.4367	5.13743	6.28232	12.6086	10.7669
-11.4518	-10.695	-16.8617	-6.35561	-4.41465	-15.9911	-9.41687	-4.8829	-9.61625	-16.6369	-7.34798		11.4518	10.695	16.8617	6.35561	4.41465	15.9911	9.41687	4.8829	9.61625	16.6369	7.34798
-12.8518	-6.6178	-7.58906	-26.0062	-5.87288	-12.5121	-5.2541	-7.06045	-13.6924	-7.2985	-17.6615		12.8518	6.6178	7.58906	26.0062	5.87288	12.5121	5.2541	7.06045	13.6924	7.2985	17.6615
-8.56919	-10.5843	-12.8688	-5.53242	-4.52856	-8.60586	-4.51921	-6.00517	-7.72203	-27.6232	-16.5014		8.56919	10.5843	12.8688	5.53242	4.52856	8.60586	4.51921	6.00517	7.72203	27.6232	16.5014
-6.68776	-6.00303	-11.3053	-8.01225	-4.46414	-13.9159	-4.13254	-6.34123	-7.60185	-5.22331	-15.1581		6.68776	6.00303	11.3053	8.01225	4.46414	13.9159	4.13254	6.34123	7.60185	5.22331	15.1581
-23.9665	-13.4236	-17.0767	-9.53708	-4.46255	-14.5873	-4.43958	-6.01926	-8.19212	-5.95573	-11.1906		23.9665	13.4236	17.0767	9.53708	4.46255	14.5873	4.43958	6.01926	8.19212	5.95573	11.1906
[truncated: 358 more rows]

## Sheet: wt_DanNema
2022_09_13_0001	2022_09_13_0003	2022_09_13_0004	2022_09_13_0005	2022_09_06_0030	2022_09_06_0033	2022_09_06_0035	2022_09_08_0006	2022_09_08_0010	2022_09_08_0016	2022_09_08_0022
[truncated: 509 more rows]
