# Supplementary material for: CaV1 and CaV2 calcium channels mediate the release of distinct pools of synaptic vesicles
Source: eLife journal article supplement (doi:10.7554/elife.81407), 2023-02-23
Supplement: fig3-data1 [file cav_exp_record (1).xlsx]

## Sheet: Sheet1
	n2				unc-2				egl-19				double				u68
	no stim		50 ms		no stim		50 ms		no stim		50 ms		no stim		50 ms		no stim		50 ms
	# synapse	# micrographs	# synapse # micrographs		# synapse	# micrographs	# synapse # micrographs		# synapse	# micrographs	# synapse # micrographs		# synapse	# micrographs	# synapse # micrographs		# synapse	# micrographs	# synapse # micrographs
	8	21	3	14	2	7	4	13	7	26	5	33	6	33	3	10	2	12	3	14
	5	17	2	5	4	21	9	42	7	27	2	11	4	19	2	10	2	12	5	31
	8	41	9	40	1	10	3	16	3	7	4	16	9	42	5	7	3	14	5	18
	5	23	3	19	2	10	7	21	4	25	2	12	5	34	1	5	4	24	4	25
			5	24	3	19	4	21	8	36	1	3
			2	13	2	11					2	16
sum	26	102	24	115	14	78	27	113	29	121	16	91	24	128	11	32	11	62	17	88
