# Supplementary material for: CaV1 and CaV2 calcium channels mediate the release of distinct pools of synaptic vesicles
Source: eLife journal article supplement (doi:10.7554/elife.81407), 2023-02-23
Supplement: fig10-data1 [file counting channels spatial.xlsx]

## Sheet: Sheet1
cav1 clusters							blinks/channel
							2.7067
	number	count	particles in cluster	total particles	single particles		total channels	avg channel	variance	sem
w5_2 s1	1	128	232	283	51		104.555	78.5705	24.1144	9.84465
w5_2 s1	2	28
w5_2 s1	3	12
w5_2 s1	4	8
w5_2 s1	5	5
w5_2 s1	6	4
w5_2 s1	7	3
w5_2 s1	8	3
w5_2 s1	9	3
w5_2 s1	10	3
w5_2 s1	11	3
w5_2 s1	12	3
w5_2 s1	13	3
w5_2 s1	14	2
w5_2 s1	15	2
w5_2 s1	16	2
w5_2 s1	17	2
w5_2 s1	18	2
w5_2 s1	19	2
w5_2 s1	20	2
w5_2 s1	21	2
w5_2 s1	22	2
w5_2 s1	23	2
w5_2 s1	24	2
w5_2 s1	25	2
w5_2 s1	26	2
w5_2 s2	1	63	209	274	65		101.23
w5_2 s2	2	31
w5_2 s2	3	13
w5_2 s2	4	13
w5_2 s2	5	6
w5_2 s2	6	6
w5_2 s2	7	6
w5_2 s2	8	6
w5_2 s2	9	5
w5_2 s2	10	5
w5_2 s2	11	5
w5_2 s2	12	5
w5_2 s2	13	3
w5_2 s2	14	3
w5_2 s2	15	3
w5_2 s2	16	3
w5_2 s2	17	3
w5_2 s2	18	2
w5_2 s2	19	2
w5_2 s2	20	2
w5_2 s2	21	2
w5_2 s2	22	2
w5_2 s2	23	2
w5_2 s2	24	2
w5_2 s2	25	2
w5_2 s2	26	2
w5_2 s2	27	2
w5_2 s2	28	2
w5_2 s2	29	2
w5_2 s2	30	2
w5_2 s2	31	2
w5_2 s2	32	2
w1_1 s1	1	40	144	207	63		76.4769
w1_1 s1	2	14
w1_1 s1	3	13
w1_1 s1	4	11
w1_1 s1	5	8
w1_1 s1	6	7
w1_1 s1	7	7
w1_1 s1	8	4
w1_1 s1	9	4
w1_1 s1	10	4
w1_1 s1	11	3
w1_1 s1	12	3
w1_1 s1	13	3
w1_1 s1	14	3
w1_1 s1	15	3
w1_1 s1	16	3
w1_1 s1	17	2
w1_1 s1	18	2
w1_1 s1	19	2
w1_1 s1	20	2
w1_1 s1	21	2
w1_1 s1	22	2
w1_1 s1	23	2
w1_1 s2	1	77	183	214	31		79.0631
w1_1 s2	2	44
w1_1 s2	3	22
w1_1 s2	4	20
w1_1 s2	5	3
w1_1 s2	6	3
w1_1 s2	7	2
w1_1 s2	8	2
w1_1 s2	9	2
w1_1 s2	10	2
w1_1 s2	11	2
w1_1 s2	12	2
w1_1 s2	13	2
w3_3 s1	1	117	164	215	51		79.4325
w3_3 s1	2	12
w3_3 s1	3	5
w3_3 s1	4	5
w3_3 s1	5	4
w3_3 s1	6	4
w3_3 s1	7	4
w3_3 s1	8	3
w3_3 s1	9	2
w3_3 s1	10	2
w3_3 s1	11	2
w3_3 s1	12	2
w3_3 s1	13	2
w3_3 s2	1	30	54	83	29		30.6646
w3_3 s2	2	4
w3_3 s2	3	3
w3_3 s2	4	3
w3_3 s2	5	2
w3_3 s2	6	2
w3_3 s2	7	2
w3_3 s2	8	2
w3_3 s2	9	2
w3_3 s2	10	2
w3_3 s2	11	2
