# Supplementary material for: CaV1 and CaV2 calcium channels mediate the release of distinct pools of synaptic vesicles
Source: eLife journal article supplement (doi:10.7554/elife.81407), 2023-02-23
Supplement: fig10-data1 [file PHOTONCOUNT.xlsx]

## Sheet: Sheet1
cluster-ID	photon-count	cluster sum photon	sum all	sum/avg	cluster-ID	photon-count		sum all	sum/avg	cluster-ID	photon-count		sum all	sum/avg	cluster-ID	photon-count		sum all	sum/avg	cluster-ID	photon-count		sum all	sum/avg	cluster-ID	photon-count		sum all	sum/avg		all clusters
0	710.882	710.882	131259	65.7638	0	808.848	808.848	39070.4	19.5751	0	1217.99	1217.99	153308	76.8106	0	811.468	811.468	66673.2	33.4048	0	2745.65	2745.65	298440	149.525	0	1871.69	1871.69	207417	103.921		single blink	channel
0	853.707	853.707			0	619.785	619.785			0	974.656	974.656			0	699.046	699.046			0	976.611	976.611			0	1446.67	1446.67			total n	1170	449
0	892.854	892.854			0	835.585	835.585			0	939.667	939.667			0	814.46	814.46			0	749.777	749.777			0	1610.69	1610.69			mean	765.955	1995.92
0	847.956	847.956			0	438.28	438.28			0	981.837	981.837			0	887.401	887.401			0	691.477	691.477			0	1587.08	1587.08			stdev	389.915	10371.5
0	749.631	749.631			0	552.439	552.439			0	910.138	910.138			0	1241.52	1241.52			0	825.385	825.385			0	1858.79	1858.79			SEM	11.3993	489.459
0	657.942	657.942			0	630.541	630.541			0	678.728	678.728			0	1481.56	1481.56			0	1027.94	1027.94			0	1132.86	1132.86			SUM
0	862.682	862.682			0	547.301	547.301			0	829.601	829.601			0	1508.71	1508.71			0	775.161	775.161			0	1014.65	1014.65			avg avg	74.8333
0	606.289	606.289			0	529.239	529.239			0	762.502	762.502			0	749.881	749.881			0	562.475	562.475			0	965.591	965.591			st avg avg	47.4992
0	666.004	666.004			0	533.132	533.132			0	783.244	783.244			0	615.273	615.273			0	710.688	710.688			0	1112.28	1112.28			sem	19.3915
0	915.635	915.635			0	410.613	410.613			0	643.557	643.557			0	575.976	575.976			0	762.959	762.959			0	1085.07	1085.07
0	618.89	618.89			0	437.198	437.198			0	631.994	631.994			0	513.519	513.519			0	629.892	629.892			0	1186.87	1186.87
0	540.214	540.214			0	556.68	556.68			0	661.264	661.264			0	559.969	559.969			0	711.709	711.709			0	1145.85	1145.85
0	639.517	639.517			0	464.575	464.575			0	429.288	429.288			0	541.226	541.226			0	820.975	820.975			0	1367.49	1367.49
0	815.322	815.322			0	547.895	547.895			0	418.968	418.968			0	397.71	397.71			0	804.583	804.583			0	1376.7	1376.7
0	504.499	504.499			0	393.778	393.778			0	544.559	544.559			0	473.316	473.316			0	561.342	561.342			0	989.02	989.02
0	586.844	586.844			0	504.817	504.817			0	468.88	468.88			0	574.519	574.519			0	732.232	732.232			0	1095.2	1095.2
0	487.152	487.152			0	424.421	424.421			0	751.501	751.501			0	632.358	632.358			0	582.196	582.196			0	814.821	814.821
0	478.058	478.058			0	704.219	704.219			0	746.221	746.221			0	693.145	693.145			0	434.338	434.338			0	725.49	725.49
0	579.794	579.794			0	346.89	346.89			0	764.517	764.517			0	634.191	634.191			0	548.143	548.143			0	1094.56	1094.56
0	594.016	594.016			0	546.359	546.359			0	783.67	783.67			0	644.351	644.351			0	548.588	548.588			0	939.789	939.789
0	646.331	646.331			0	398.038	398.038			0	576.75	576.75			0	585.149	585.149			0	708.786	708.786			0	769.39	769.39
0	788.9	788.9			0	404.357	404.357			0	607.198	607.198			0	511.985	511.985			0	704.273	704.273			0	967.303	967.303
0	789.043	789.043			0	417.991	417.991			0	728.232	728.232			0	515.597	515.597			0	794.374	794.374			0	766.606	766.606
0	660.51	660.51			0	627.365	627.365			0	472.624	472.624			0	524.41	524.41			0	749.171	749.171			0	922.986	922.986
0	852.036	852.036			0	423.448	423.448			0	678.831	678.831			0	339.268	339.268			0	1219.89	1219.89			0	1020.61	1020.61
0	558.016	558.016			0	613.147	613.147			0	700.66	700.66			0	343.834	343.834			0	756.301	756.301			0	1418.59	1418.59
0	669.587	669.587			0	614.331	614.331			0	551.308	551.308			0	429.336	429.336			0	520.261	520.261			0	976.272	976.272
0	655.02	655.02			0	685.389	685.389			0	632.046	632.046			0	429.901	429.901			0	463.816	463.816			0	844	844
0	697.448	697.448			0	639.281	639.281			0	681.815	681.815			0	477.121	477.121			0	582.062	582.062			0	858.444	858.444
0	645.459	645.459			0	457.2	457.2			0	761.92	761.92			1	1060.17	32489.6			0	570.876	570.876			0	1033.02	1033.02
0	505.459	505.459			0	418.426	418.426			0	585.639	585.639			1	904.546				0	857.857	857.857			0	781.178	781.178
0	513.483	513.483			0	407.454	407.454			0	639.006	639.006			1	971.294				0	904.559	904.559			0	824.818	824.818
0	511.274	511.274			0	339.308	339.308			0	648.19	648.19			1	1020.54				0	542.424	542.424			0	681.007	681.007
0	609.264	609.264			0	516.931	516.931			0	410.249	410.249			1	928.733				0	725.125	725.125			0	920.457	920.457
0	524.187	524.187			0	371.472	371.472			0	499.674	499.674			1	896.965				0	547.966	547.966			0	871.504	871.504
0	822.343	822.343			0	456.292	456.292			0	383.889	383.889			1	897.129				0	576.121	576.121			0	674.237	674.237
0	582.681	582.681			0	363.383	363.383			0	372.452	372.452			1	795.651				0	727.242	727.242			0	943.21	943.21
0	802.393	802.393			0	426.955	426.955			0	558.609	558.609			1	841.834				0	569.117	569.117			0	768.072	768.072
0	587.058	587.058			0	326.795	326.795			0	369.173	369.173			1	1003.14				0	547.293	547.293			0	539.517	539.517
0	697.846	697.846			0	315.287	315.287			0	325.699	325.699			1	1099.18				0	556.661	556.661			0	798.666	798.666
0	546.851	546.851			0	452.955	452.955			0	325.892	325.892			1	1105.68				0	451.143	451.143			0	833.405	833.405
0	632.078	632.078			0	416.842	416.842			0	421.264	421.264			1	1007.38				0	491.151	491.151			0	883.212	883.212
0	361.792	361.792			0	442.569	442.569			0	372.626	372.626			1	723.531				0	458.51	458.51			0	811.4	811.4
0	435.177	435.177			0	409.508	409.508			0	308.995	308.995			1	1093.59				0	445.412	445.412			0	849.507	849.507
0	510.947	510.947			0	359.257	359.257			0	379.936	379.936			1	1202.27				0	424.521	424.521			0	513.678	513.678
0	434.103	434.103			0	299.18	299.18			0	367.91	367.91			1	1347.09				0	509.669	509.669			0	525.552	525.552
0	431.086	431.086			0	361.855	361.855			0	307.072	307.072			1	1451.21				0	572.088	572.088			0	533.367	533.367
0	408.448	408.448			0	340.086	340.086			0	345.761	345.761			1	1493.81				0	542.211	542.211			0	642.286	642.286
0	400.487	400.487			0	378.325	378.325			0	395.903	395.903			1	1147.33				0	545.252	545.252			0	668.168	668.168
0	520.54	520.54			1	502.092	2262.87			0	349.811	349.811			1	1225.59				0	422.708	422.708			0	489.2	489.2
0	390.44	390.44			1	531.438				0	365.433	365.433			1	1136.38				0	651.201	651.201			0	548.463	548.463
0	461.53	461.53			1	555.846				0	368.717	368.717			1	1270.56				1	2460.4	196499			0	543.605	543.605
0	351.432	351.432			1	673.494				0	293.308	293.308			1	1386.49				1	2291.77				0	641.166	641.166
0	373.438	373.438			2	704.123	1811.81			0	361.18	361.18			1	1005.73				1	3090.61				0	411.524	411.524
0	381.173	381.173			2	628.09				0	290.844	290.844			1	1270.2				1	2740.4				0	531.366	531.366
0	366.231	366.231			2	479.6				0	322.265	322.265			1	1269.85				1	2328.83				0	625.889	625.889
0	374.846	374.846			3	600.998	1327.88			0	356.375	356.375			1	1250.94				1	2003.34				0	705.583	705.583
0	467.574	467.574			3	369.511				0	366.307	366.307			1	1152.45				1	1877.32				0	558.381	558.381
0	403.12	403.12			3	357.376				0	234.288	234.288			1	530.373				1	2072.77				0	531.13	531.13
0	319.912	319.912			4	417.137	1509.66			0	215.699	215.699			2	1370.42	3247.69			1	2023.14				0	526.364	526.364
0	377.528	377.528			4	544.263				0	353.3	353.3			2	1174.06				1	2195.52				0	464.125	464.125
0	398.958	398.958			4	548.257				0	299.079	299.079			2	344.402				1	2033.44				0	776.86	776.86
0	451.17	451.17			5	631.587	1238.93			0	241.607	241.607			2	358.807				1	2006.4				0	791.198	791.198
0	364.861	364.861			5	607.341				0	296.609	296.609			3	1387.27	1985.11			1	2074.46				0	617.711	617.711
1	835.196	25049.9			6	527.876	988.837			0	268.969	268.969			3	310.865				1	2339.16				0	517.708	517.708
1	816.229				6	460.961				0	253.76	253.76			3	286.977				1	2261.56				1	1122.08	36922.8
1	585.536				7	441.174	849.293			0	291.758	291.758			4	703.062	1882.62			1	2064.95				1	1079.15
1	746.96				7	408.119				0	289.075	289.075			4	721.187				1	1997.76				1	1041.81
1	675.921				8	444.313	991.453			1	1198.89	77670.1			4	458.37				1	2125.07				1	515.94
1	486.525				8	547.14				1	1190.49				5	1097.56	2023.7			1	2214.46				1	571.221
1	616.466				9	436.547	906.813			1	1190.3				5	926.145				1	1758.72				1	717.868
1	704.662				9	470.266				1	1008.26				6	605.278	1146.32			1	2179.53				1	549.938
1	593.717				10	448.52	905.836			1	1377.68				6	541.038				1	1658.48				1	712.818
1	717.295				10	457.316				1	1077.5				7	537.38	1142.52			1	1666.71				1	543.947
1	752.064				11	514.568	1095.96			1	1244.48				7	605.137				1	1886.71				1	534.804
1	650.941				11	581.394				1	1180.04				8	579.47	1331.24			1	1815.73				1	405.448
1	600.201				12	380.114	835.487			1	1074.93				8	751.772				1	1485.55				1	590.164
1	702.803				12	455.373				1	1055.27				9	477.615	752.569			1	1782.06				1	622.57
1	532.652				13	489.736	829.522			1	1250.34				9	274.954				1	1638.82				1	608.466
1	525.67				13	339.786				1	1182.02				10	383.488	743.793			1	1650.9				1	576.92
1	583.174									1	1125.06				10	360.305				1	1860.45				1	573.696
1	504.736									1	1076.73				11	352.567	721.839			1	2049.05				1	549.399
1	503.909									1	1199.41				11	369.272				1	2009.5				1	567.568
1	615.071									1	1326.49									1	1634.91				1	527.757
1	560.935									1	1003.57									1	1890.13				1	725.506
1	682.712									1	841.596									1	2238.87				1	601.405
1	668.032									1	879.362									1	1756.95				1	555.662
1	795.603									1	1002.25									1	1555.98				1	547.157
1	739.9									1	1165.14									1	1425.48				1	610.551
1	582.295									1	1050.56									1	1703.33				1	715.976
1	692.871									1	865.987									1	1457.99				1	422.738
1	595.968									1	1055.94									1	1609.33				1	458.543
1	587.488									1	1080.39									1	1570.67				1	531.326
1	567.192									1	987.529									1	1655.04				1	615.06
1	700.022									1	996.622									1	1513.18				1	496.005
1	702.733									1	1087.05									1	1574.07				1	513.427
1	460.067									1	1192.45									1	1744.09				1	549.136
1	508.862									1	790.359									1	1668.16				1	514.265
1	601.006									1	1153.82									1	1741.38				1	567.605
1	636.29									1	1069.61									1	1650.85				1	571.221
1	598.898									1	959.551									1	1764.18				1	570.841
1	563.457									1	791.209									1	1700.93				1	512.722
1	520.233									1	946.172									1	1633.36				1	693.108
1	535.585									1	1081.78									1	1501.94				1	566.912
2	1099.65	12376								1	580.755									1	1596.93				1	487.304
2	1035.82									1	787.153									1	1538.27				1	601.571
2	936.284									1	508.721									1	1661.08				1	620.188
2	1013.38									1	544.672									1	1619.91				1	592.342
2	970.268									1	426.243									1	1508.38				1	554.091
2	963.001									1	538.447									1	1579.85				1	575.988
2	949.716									1	426.671									1	1432.26				1	680.829
2	861.864									1	597.001									1	1820.26				1	597.978
2	890.832									1	513.484									1	1573.1				1	472.956
2	936.227									1	455.442									1	1358.01				1	478.667
2	750.526									1	594.586									1	1258.71				1	562.837
2	650.705									1	483.897									1	1554.59				1	477.232
2	710.989									1	399.607									1	1502.71				1	454.493
2	606.783									1	557.567									1	1505.09				1	482.302
3	898.067	10624.5								1	509.126									1	1786.29				1	554.507
3	1127.67									1	406.306									1	1539.38				1	476.203
3	878.257									1	515.722									1	1682.77				1	647.563
3	691.542									1	505.425									1	1847.02				1	648.026
3	896.343									1	588.148									1	1576.61				1	473.988
3	828.881									1	456.882									1	1258.85				1	600.692
3	960.629									1	540.23									1	1435.39				1	563.999
3	982.791									1	503.002									1	1513.95				1	502.363
3	636.103									1	454.125									1	1234.02				1	568.517
3	538.104									1	522.089									1	1347.8				1	497.473
3	700.573									1	458.329									1	1809.52				2	687.137	24541
3	870.027									1	513.774									1	1294.05				2	920.043
3	615.552									1	571.873									1	1264.15				2	861.649
4	890.634	9282.95								1	436.397									1	1598.19				2	1148.9
4	824.285									1	602.41									1	1417.26				2	759
4	854.694									1	537.377									1	1479.24				2	798.355
4	935.39									1	544.783									1	1359.38				2	860.926
4	831.191									1	449.332									1	1332.6				2	1218.08
4	970.003									1	583.308									1	1333.86				2	1136.11
4	858.728									1	557.642									1	1299.87				2	818.555
4	804.811									1	620.338									1	1416.26				2	942.827
4	634.602									1	580.003									1	1268.9				2	913.589
4	754.606									1	525.785									1	1287.94				2	879.531
4	924.008									1	595.247									1	1422.84				2	731.128
5	690.503	4869.21								1	495.159									1	1292.88				2	1182.38
5	584.478									1	448.826									1	1268.92				2	718.044
5	667.266									1	536.933									1	1288.6				2	813.606
5	579.644									1	481.527									1	1115.72				2	732.843
5	500.538									1	450.776									1	1007.28				2	1011.07
5	615.993									1	482.206									1	938.18				2	748.885
5	604.849									1	417.21									1	1143.4				2	436.7
5	625.939									1	539.99									1	1166.82				2	660.436
6	531.17	3893.86								1	522.222									1	1132.62				2	761.37
6	662.905									1	555.292									1	1374.69				2	590.025
6	428.777									1	559.258									1	1308.77				2	567.38
6	533.532									1	523.404									1	1349.77				2	670.693
6	503.217									1	525.317									1	1322.96				2	596.813
6	677.232									1	352.623									1	1409.09				2	757.25
6	557.027									1	437.217									1	1369.48				2	571.864
7	590.054	4221.98								1	478.512									1	1245.47				2	498.794
7	630.557									1	403.297									1	1232.35				2	547.061
7	565.041									1	448.329									1	1575.16				3	1307.92	9146.6
7	636.2									1	509.382									1	1594.03				3	900.387
7	615.582									1	589.15									1	1020.94				3	899.459
7	575.302									1	476.247									1	899.466				3	552.319
7	609.245									1	438.973									1	837.834				3	621.606
8	586.115	2498.49								1	567.481									1	772.68				3	726.157
8	666.885									1	496.898									1	775.655				3	527.162
8	509.26									1	460.803									1	1243.96				3	594.087
8	736.228									1	446.715									1	1230.83				3	645.51
9	647.336	2438.35								1	524.391									1	1027.88				3	729.27
9	550.066									1	392.436									1	795.722				3	569.757
9	743.305									1	384.907									1	763.464				3	564.455
9	497.641									1	469.801									1	798.995				3	508.509
10	660.389	1757.43								1	448.326									1	877.05				4	679.269	10047.7
10	320.875									1	447.675									1	936.663				4	740.692
10	396.405									1	475.478									1	690.369				4	688.971
10	379.763									1	395.823									1	659.379				4	830.355
11	713.848	1916.12								1	447.35									1	790.442				4	941.038
11	579.867									1	392.419									1	644.734				4	706.957
11	622.407									1	260.18									1	647.489				4	810.889
12	618.749	1602.68								1	310.15									2	718.971	15571.4			4	751.095
12	515.712									1	245.637									2	520.829				4	782.269
12	468.216									1	247.185									2	527.72				4	648.57
13	527.38	1767.03								1	340.281									2	622.724				4	787.64
13	637.562									1	235.978									2	530.158				4	730.604
13	602.088									1	257.589									2	588.328				4	949.369
14	568.857	1707.3								2	1042.42	10670.5								2	618.972				5	806.595	5452.44
14	544.424									2	1215.17									2	539.041				5	986.424
14	594.021									2	1253.17									2	368.36				5	973.768
15	617.919	1832.53								2	966.414									2	582.771				5	1165.08
15	632.632									2	901.654									2	655.01				5	745.17
15	581.975									2	756.36									2	568.226				5	775.401
16	349.509	1166.96								2	695.259									2	553.324				6	1035.65	5493.8
16	401.047									2	657.112									2	573.785				6	947.116
16	416.408									2	715.505									2	568.488				6	868.684
17	624.634	1142.31								2	828.054									2	502.693				6	1053.95
17	517.671									2	884.654									2	651.088				6	781.625
18	624.672	1244.88								2	754.755									2	570.256				6	806.776
18	620.205									3	728.468	3687.47								2	421.256				7	1259.58	5901.54
19	509.506	1096.33								3	789.165									2	683.202				7	1460.51
19	586.825									3	791.806									2	580.047				7	885.496
20	571.554	1102.88								3	617.799									2	511.332				7	849.325
20	531.321									3	760.234									2	468.765				7	684.421
21	593.464	1162.88								4	590.356	3247.92								2	501.553				7	762.208
21	569.42									4	639.717									2	462.941				8	737.996	4722.54
22	498.67	887.976								4	796.021									2	496.929				8	740.891
22	389.306									4	607.323									2	545.606				8	697.3
23	331.017	726.788								4	614.499									2	639.004				8	1050.95
23	395.771									5	982.321	2936.11								3	1346.05	9263.68			8	802.557
										5	823.925									3	1248.39				8	692.844
										5	776.732									3	1281.75				9	1076.5	5966.8
										5	353.132									3	628.367				9	1534.04
										6	734.468	2997.43								3	570.833				9	1280.5
										6	788.318									3	475.538				9	1061.37
										6	798.286									3	849.504				9	1014.39
										6	676.355									3	608.37				10	758.11	3487.64
										7	631.313	2608.24								3	624.174				10	556.415
										7	712.157									3	590.614				10	736.948
										7	616.726									3	498.65				10	656.615
										7	648.04									3	541.442				10	779.55
										8	594.166	2003.2								4	503.862	4571			11	721.321	3400.68
										8	668.021									4	646.895				11	650.015
										8	741.014									4	462.385				11	822.095
										9	887.241	1260.85								4	447.696				11	699.209
										9	373.608									4	660.305				11	508.039
										10	768.622	1878.45								4	557.572				12	1070.95	3317.24
										10	1109.83									4	563.208				12	545.859
										11	632.395	973.613								4	729.074				12	525.489
										11	341.218									5	465.651	3131.8			12	630.327
										12	738.784	1457.76								5	704.507				12	544.61
										12	718.978									5	716.893				13	814.95	2149.86
										13	745.259	1297.2								5	537.211				13	840.895
										13	551.946									5	707.534				13	494.015
										14	724.043	1366.76								6	605.439	2437.04			14	685.096	2083.5
										14	642.72									6	643.695				14	730.133
										15	546.216	922.675								6	629.272				14	668.274
										15	376.459									6	558.634				15	715.428	1959.81
										16	643.141	1329.04								7	1228.53	2625.71			15	721.537
										16	685.897									7	707.993				15	522.844
										17	592.954	1171.77								7	689.185				16	727.485	1891.82
										17	578.814									8	623.297	2053.6			16	585.557
										18	343.059	678.155								8	814.847				16	578.778
										18	335.096									8	615.454				17	514.968	1565.51
																				9	562.13	1989.33			17	570.321
																				9	667.948				17	480.22
																				9	759.253				18	716.732	1534.46
																				10	1165.23	2639.76			18	817.729
																				10	864.127				19	1265.04	2097.08
																				10	610.406				19	832.04
																				11	705.069	2071.63			20	996.148	1548.48
																				11	574.143				20	552.335
																				11	792.42				21	974.306	1858.54
																				12	575.042	1733.94			21	884.238
																				12	526.578				22	909.892	1482.57
																				12	632.319				22	572.682
																				13	503.286	1637.45			23	1164.18	1769.4
																				13	563.584				23	605.224
																				13	570.576				24	869.633	1499.25
																				14	1141.75	2192.04			24	629.62
																				14	1050.29				25	1040.39	1693.12
																				15	602.618	1208.81			25	652.729
																				15	606.188				26	658.426	1112.59
																				16	606.886	1090.55			26	454.167
																				16	483.665				27	1060.31	1791.45
																				17	764.53	1296.26			27	731.136
																				17	531.726				28	671.958	1174.88
																				18	577.405	1116.75			28	502.926
																				18	539.347				29	583.127	1071.01
																				19	1382.67	2057.54			29	487.879
																				19	674.866				30	687.008	1268.27
																				20	535.545	1210.24			30	581.264
																				20	674.7				31	461.833	951.917
																				21	664.548	1189.85			31	490.084
																				21	525.3				32	733.742	1171.14
																				22	522.508	1128.35			32	437.396
																				22	605.846
																				23	754.591	1393.81
																				23	639.219
																				24	522.041	1017.85
																				24	495.81
																				25	497.372	1025.6
																				25	528.223
																				26	484.4	946.239
																				26	461.839
